# Supplementary material for: Micropillar-induced changes in cell nucleus morphology enhance bone regeneration by modulating the secretome
Source: Research Square preprint supplement (doi:10.21203/rs.3.rs-5530535/v1), 2025-01-06
Supplement: Supplementary file 1 [file 75d93189425e866dab8b181e.pdf]

# **Supplementary information**

**Microtopography-induced changes in cell  
nucleus morphology enhance bone  
regeneration by modulating the cellular  
secretome**

**Supplementary Table S1.** [List of Proteins Differentially Secreted by MSCS on Micropillars compared to Flat Surface \(Secretome\).](#)

**Supplementary Table S2.** [List of Proteins Differentially Expressed by MSCS on Micropillars compared to Flat Surface \(Proteomic\).](#)

**Supplementary Table S3.** [Gene Ontology Analysis on Genes Differentially Expressed in Tissues Regenerated with Flat and Micropillar Implants.](#)

**Supplementary Table S4.** [Top 20 Ontology Gene Sets Enriched in LMPs compared to other cell lineages.](#)

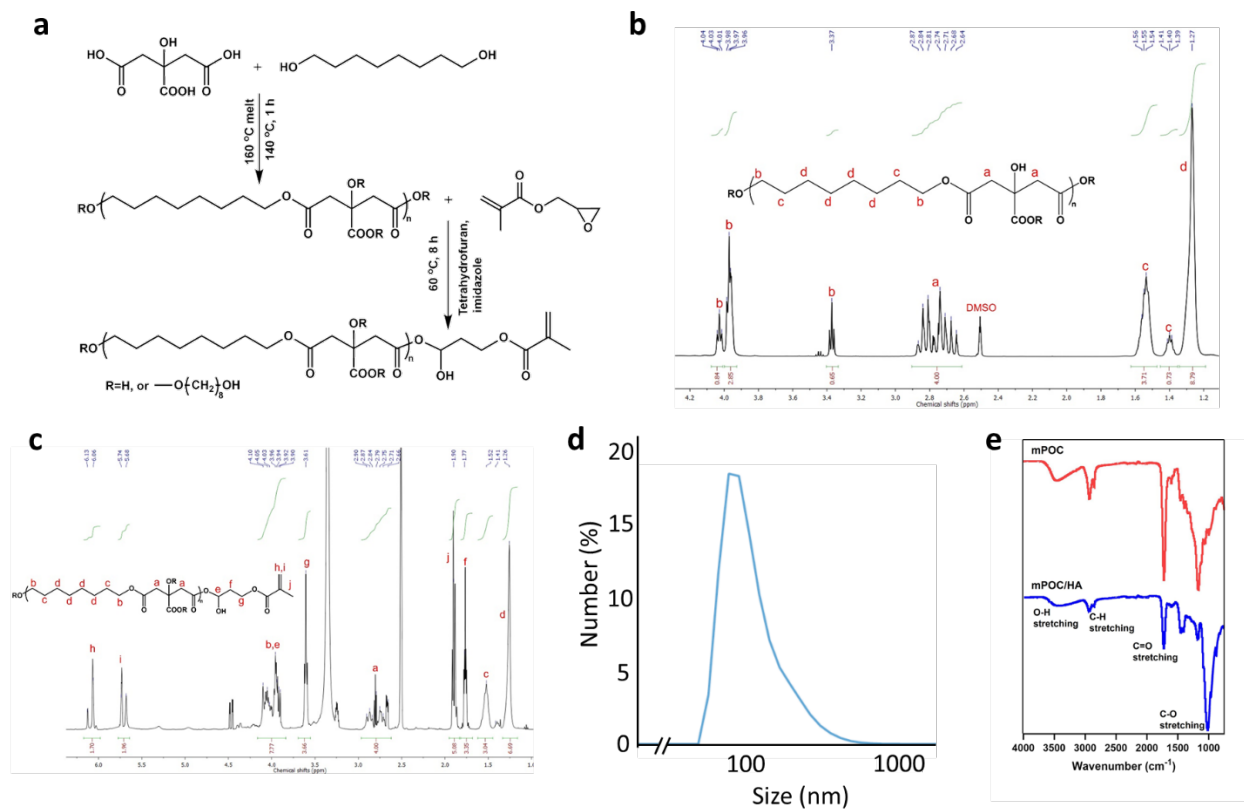

**Supplementary Figure S1. Characterization of mPOC ploymers.** **a.** Synthesis scheme of mPOC prepolymer.  $^1\text{H}$ NMR spectrum of **b.** POC prepolymer and **c.** mPOC prepolymer. **d.** Analysis of size distribution of HA nanoparticles using DLS. **e.** FTIR spectrum of mPOC and mPOC/HA films.

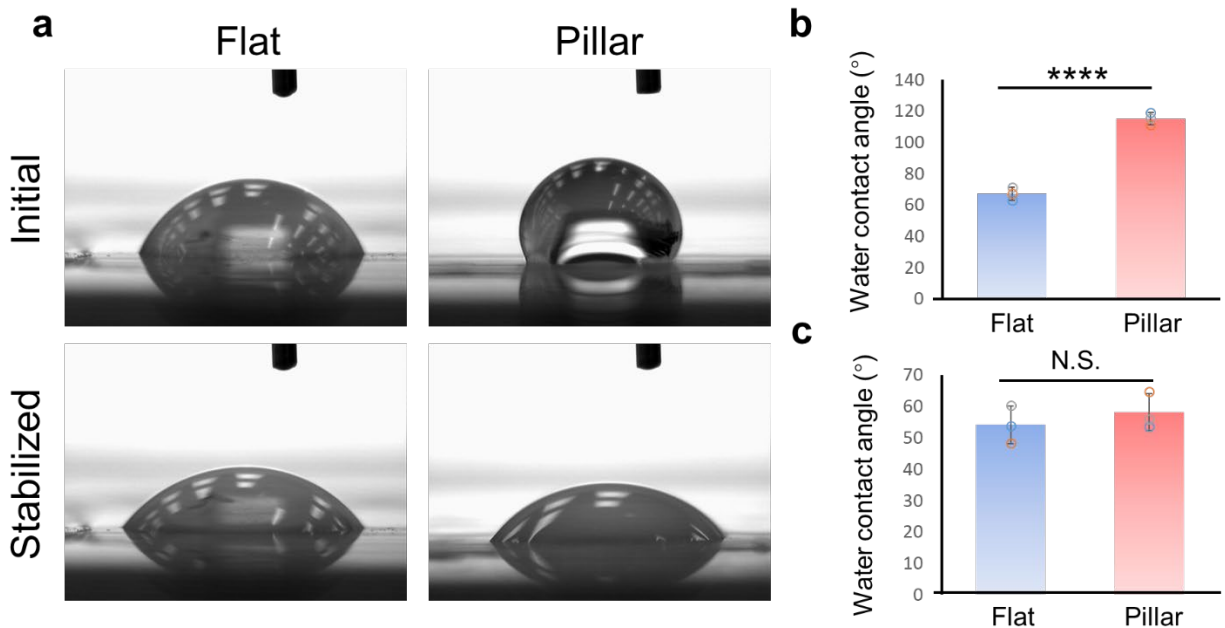

**Supplementary Figure S2. Characterization of hydrophilicity of the mPOC/HA implants.** **a.** Representative images show a water droplet on a flat or micropillar surface captured at the initial state or after stabilization (5 min). Analysis of water contact angle at **b.** initial and **c.** stabilized state. N.S., no significant difference, \*\*\*\* $p < 0.0001$ ,  $n = 3$ .

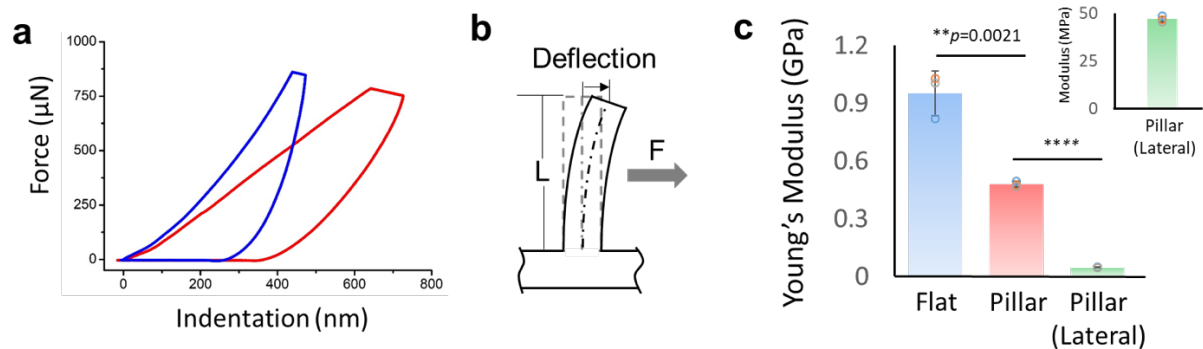

**Supplementary Figure S3. Mechanical test of flat and micropillar mPOC/HA implants.** **a.** Representative indentation-force curves collected from flat and micropillar implants. **b.** illustration of lateral deflection. **c.** Young's Modulus of flat and micropillar implants, as well as the calculated lateral modulus of micropillars. Insert: enlarged plot of later modulus of micropillars, \*\*\*\* $p < 0.0001$ ,  $n = 3$ .

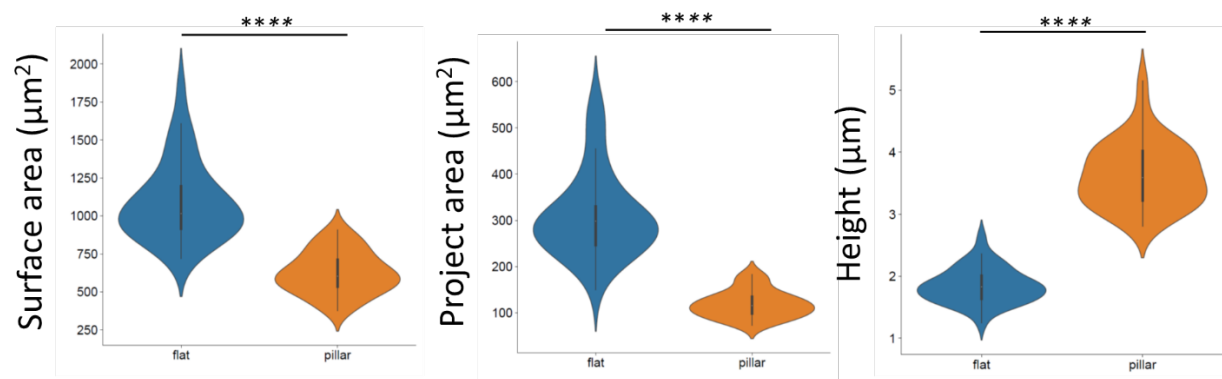

**Supplementary Figure S4. 3D morphological features on cell nuclei.** a. Surface area, b. project area, and c. height of cell nuclei on flat and micropillar mPOC/HA surfaces.  $n=35$ , \*\*\*\*  $p<0.0001$ .

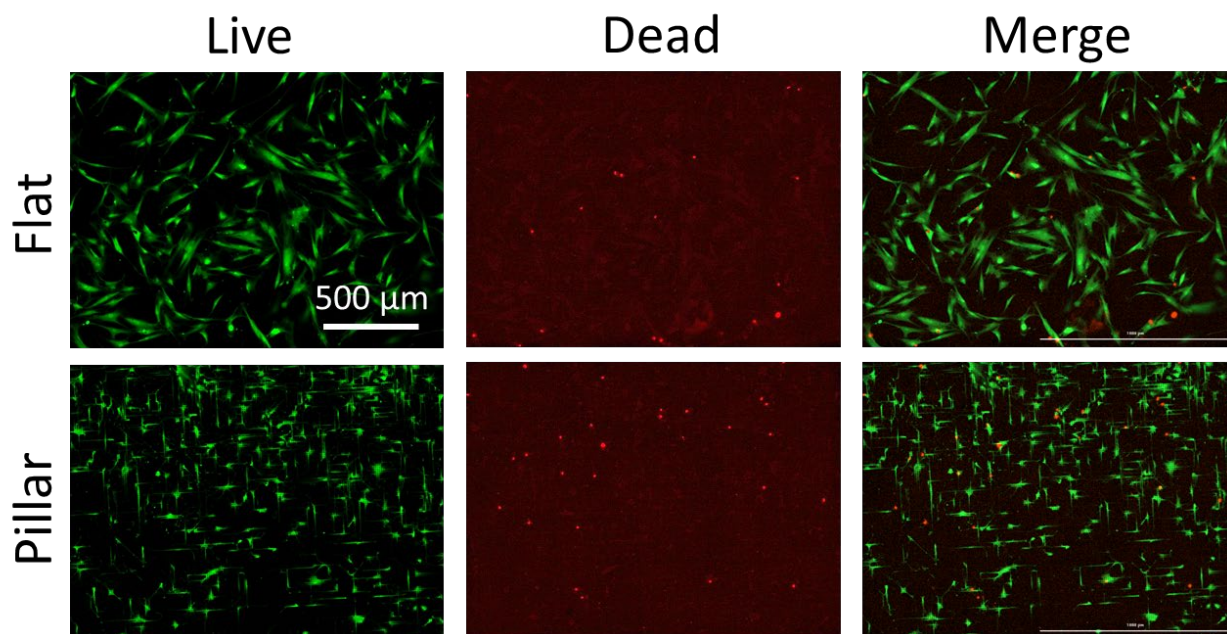

**Supplementary Figure S5.** Live/dead staining of hMSCs on flat and micropillar mPOC/HA surfaces after 24 h culture.

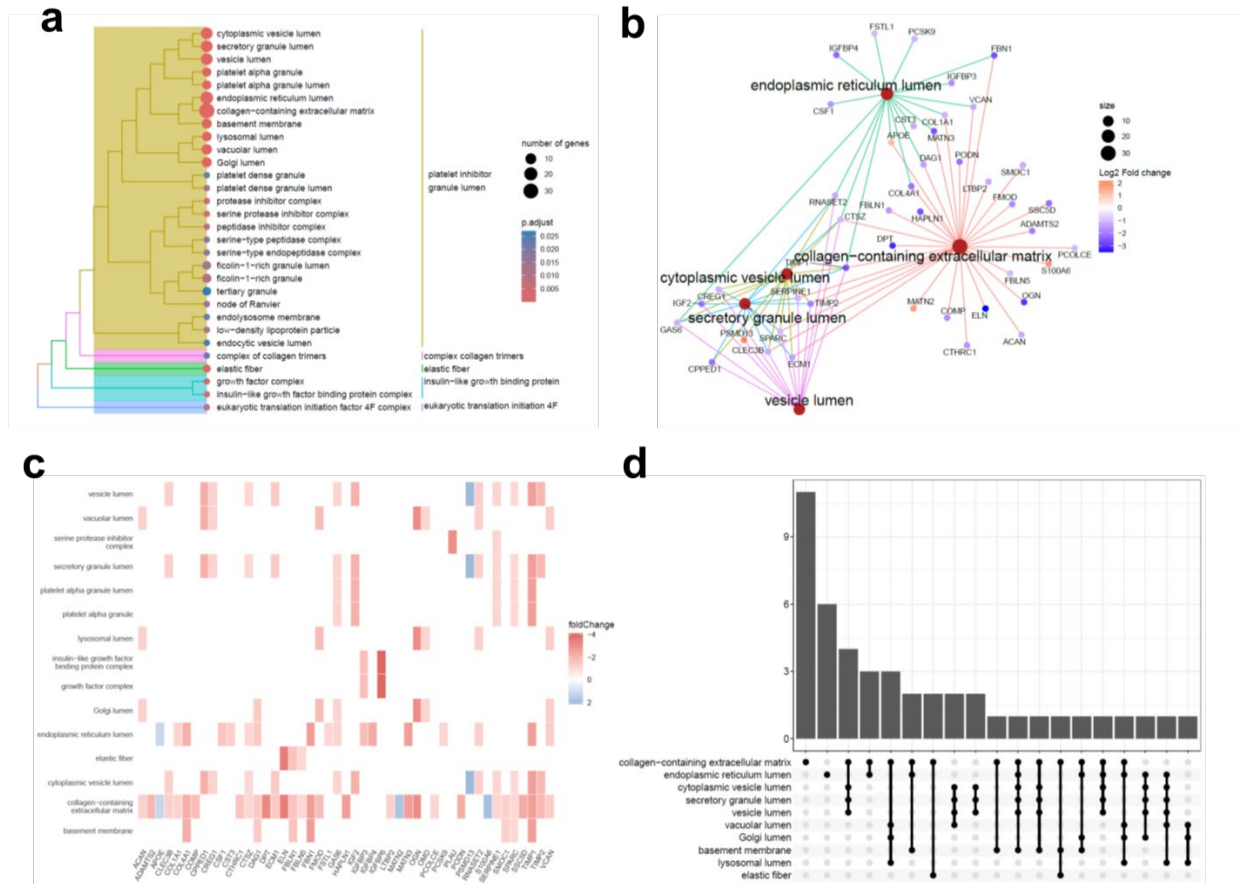

**Supplementary Figure S6. GO analysis shows the biological domain with respect to the cellular component. a.** Hierarchical clustering of enriched terms. It relies on the pairwise similarities of the enriched terms. The agglomeration method was average. **b.** The linkages of proteins and GO terms as a network. **c.** The heat-plot display the relationships between proteins and enriched terms. **d.** the protein overlapping among different GO gene sets.

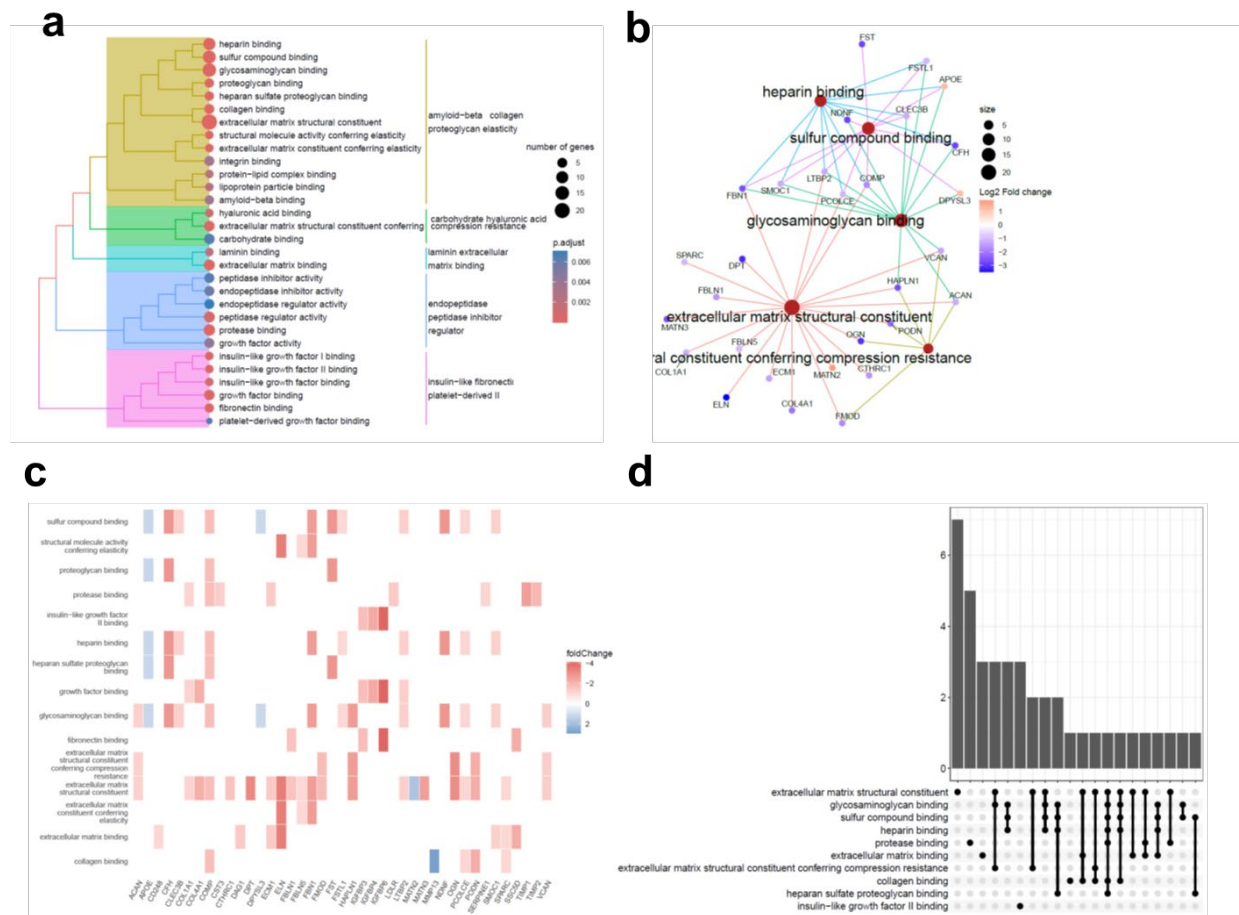

**Supplementary Figure S7. GO analysis shows the biological domain with respect to the molecular function. a.** Hierarchical clustering of enriched terms. **b.** The linkages of proteins and GO terms as a network. **c.** The heat-plot display the relationships between proteins and enriched terms. **d.** the protein overlapping among different GO gene sets.

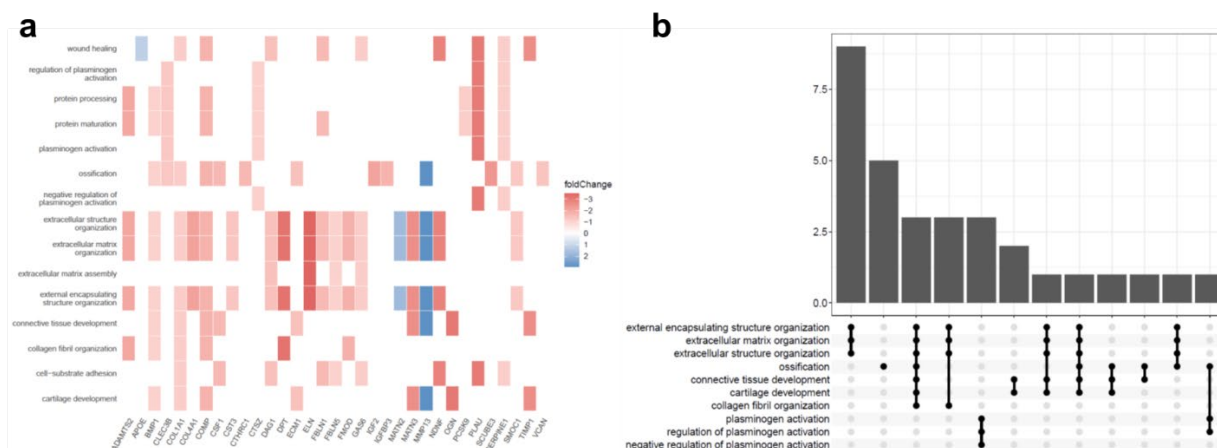

**Supplementary Figure S8. GO analysis shows the biological domain with respect to the biological process. a.** The heat-plot display the relationships between proteins and enriched terms. **b.** the protein overlapping among different GO gene sets.

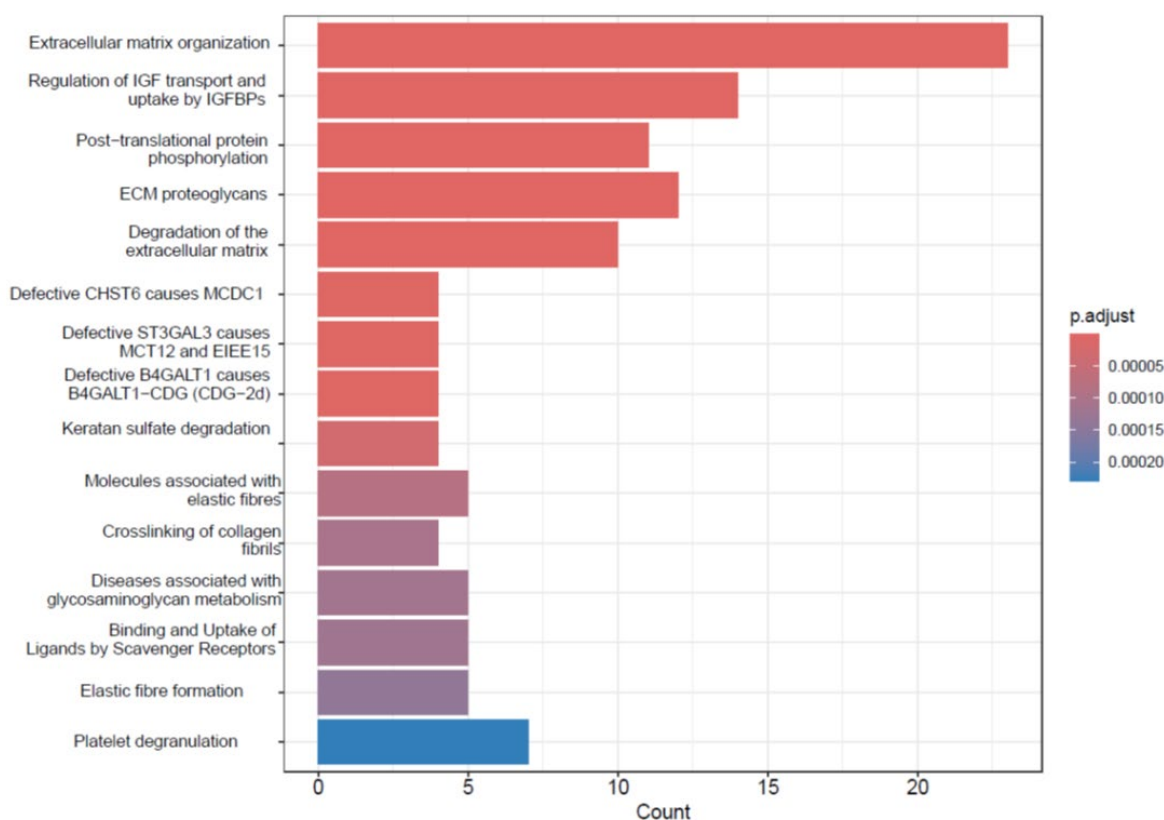

**Supplementary Figure S9. Reactome pathway analysis. Top 15 most significant enriched pathways.**



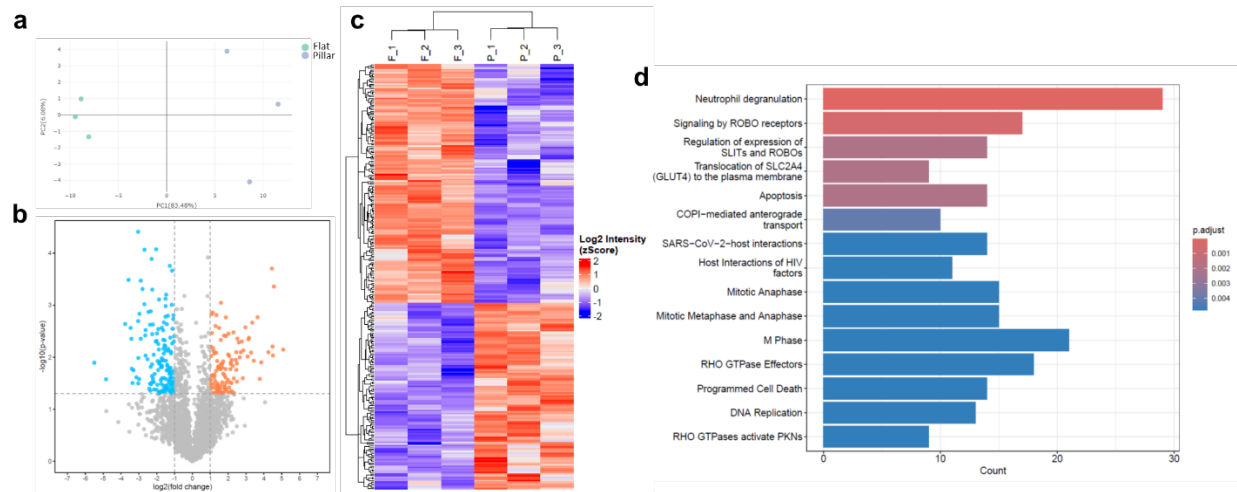

**Supplementary Figure S10. Proteome analysis of cells cultured on flat and micropillar mPOC/HA scaffolds. a.** PCA plot and **b.** volcano plot of the proteins collected inside cells. **c.** Heatmap of all significantly differently expressed proteins on flat and micropillar samples. **d.** Plot of the top 15 most significant enriched pathways based on reactome pathway analysis.

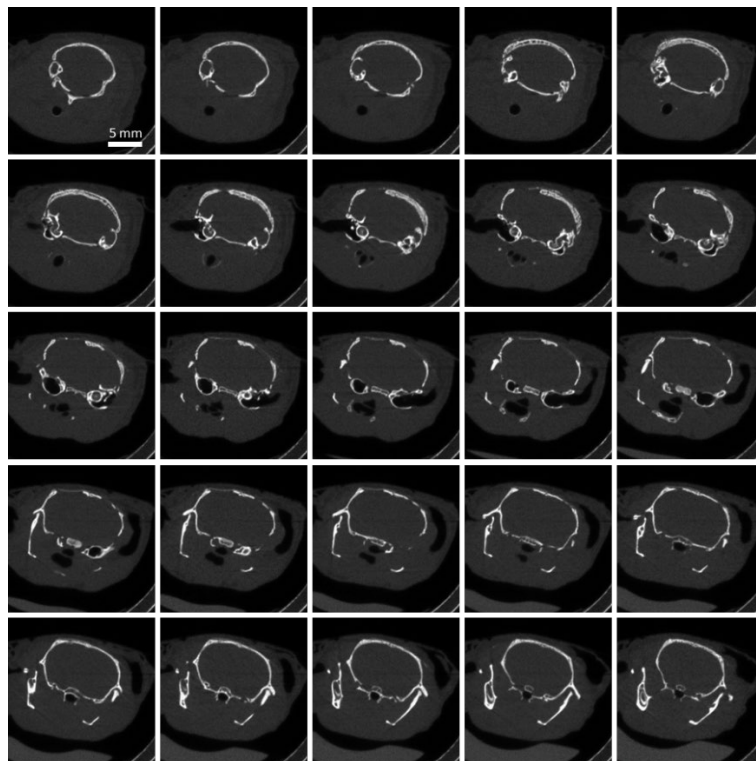

**Supplementary Figure S11.** Stack images show the regenerated tissue treated with flat (left) and micropillar (right) implants.

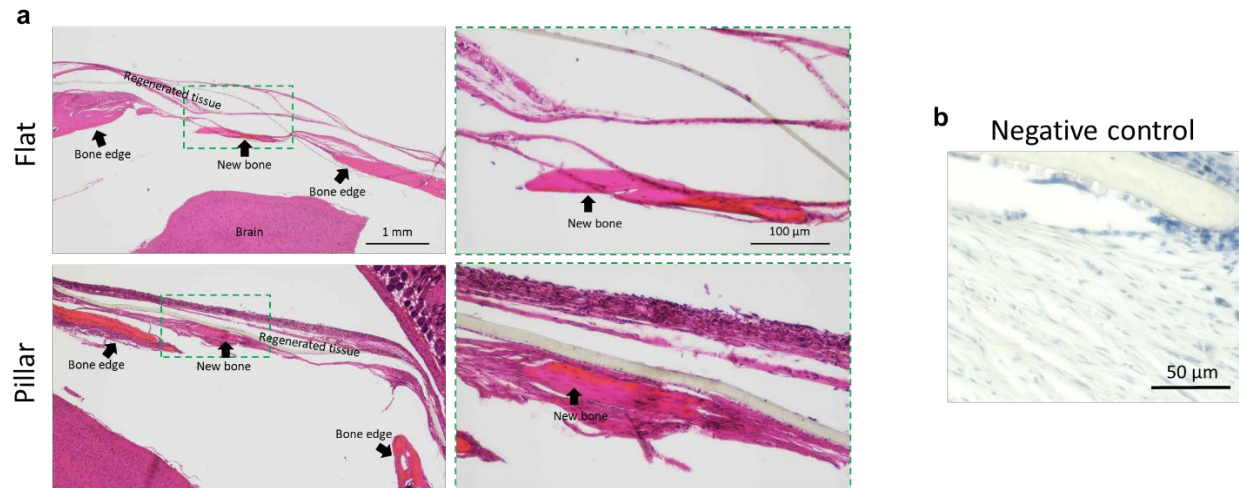

**Supplementary Figure S12. a.** H&E staining of the defect tissue treated with flat and micropillar implants. **b.** Negative control of IHC staining without primary antibody incubation.

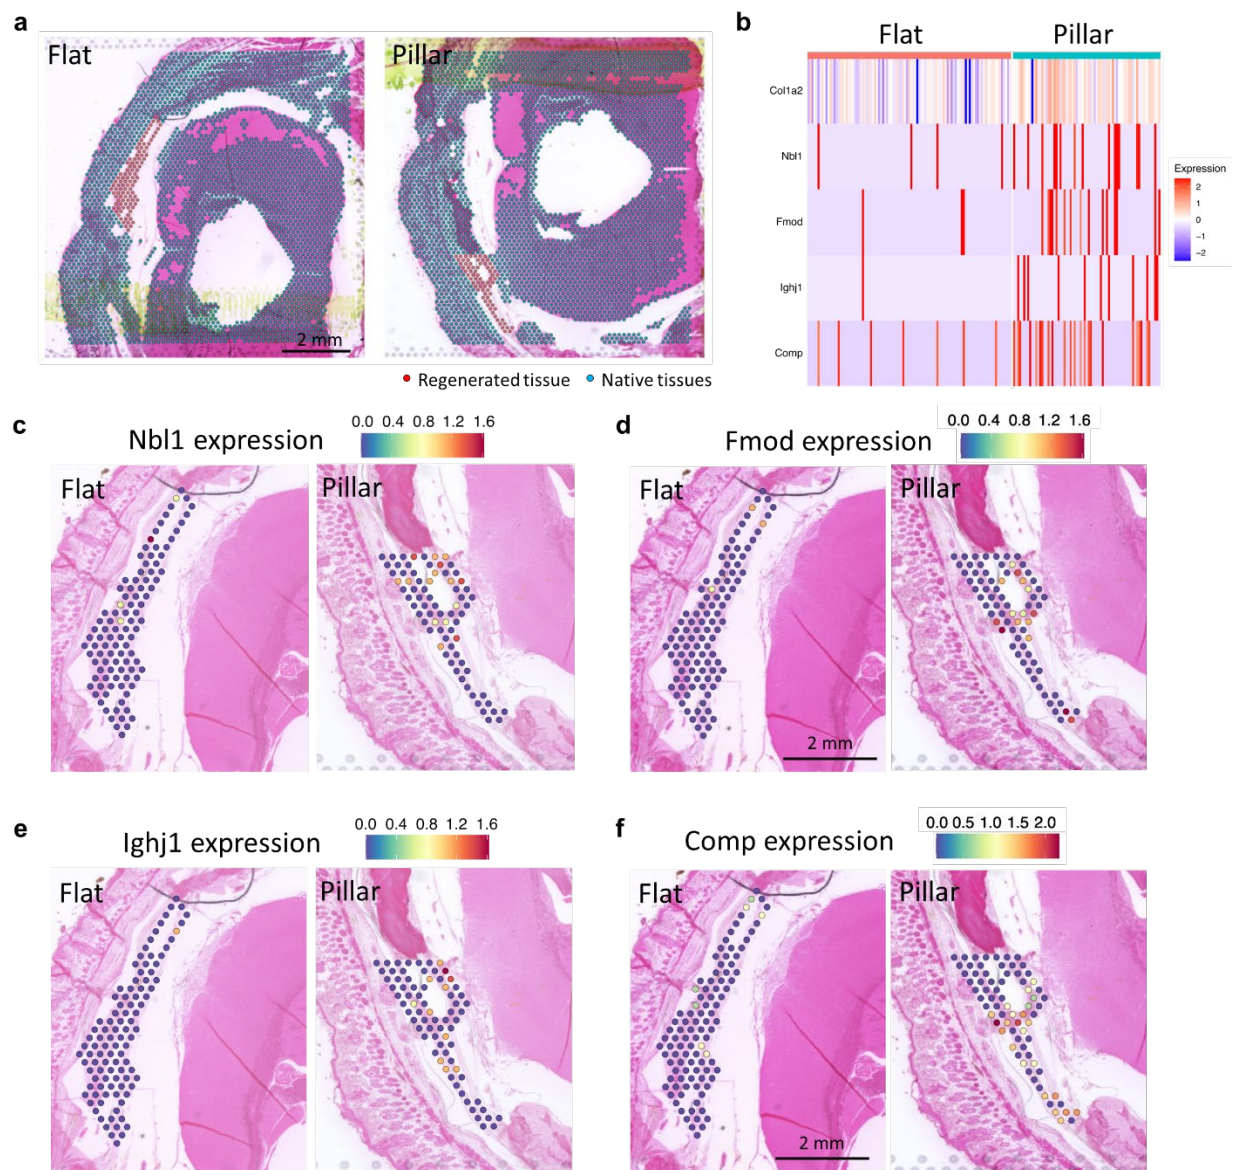

**Supplementary Figure S13. Spatial transcriptomic (ST) analysis of regenerated tissues. a.** Spatial distribution and clustering of ST spots in flat and pillar group. Blue: ST spots in non-ROI (region of interest); red: ST spots in ROI. **b.** Heatmap shows the expression of the significantly differentially expressed genes. Spatial plots of **c.** Nbl1 expression profile, **d.** Fmod expression profile, **e.** Ighj1 expression profile, and **f.** Comp expression profile in tissues regenerated with flat mPOC/HA implant and micropillar mPOC/HA implant. Nbl1: neuroblastoma suppressor of tumorigenicity 1; Fmod: fibromodulin; Ighj1: Immunoglobulin Heavy Joining 1; Comp: cartilage oligomeric matrix protein.
