# Supplementary material for: Micropillar-induced changes in cell nucleus morphology enhance bone regeneration by modulating the secretome
Source: Research Square preprint supplement (doi:10.21203/rs.3.rs-5530535/v1), 2025-01-06
Supplement: Supplementary file 1 [file 0183f5fad981b30f341dc125.xlsx]

## Sheet: MR of flat vs pillar D_ipp
Protein IDs	Gene names	Protein names	p-value	Q-value	Log2 FoldChange (D/C)	Significant Proteins
A1L4H1	SSC5D	Soluble scavenger receptor cysteine-rich domain-containing protein SSC5D	0.0129989	0.187697	-2.22825	+
A6NIZ1;P61224;P62834	RAP1B;RAP1A	Ras-related protein Rap-1b-like protein;Ras-related protein Rap-1b;Ras-related protein Rap-1A	0.038774	0.205353	0.617636
Q99613;B5ME19	EIF3C;EIF3CL	Eukaryotic translation initiation factor 3 subunit C;Eukaryotic translation initiation factor 3 subunit C-like protein	0.771977	0.884164	-0.300479
O00115	DNASE2	Deoxyribonuclease-2-alpha	0.281389	0.513088	0.469184
O00151	PDLIM1	PDZ and LIM domain protein 1	0.552422	0.739304	0.694545
O00159	MYO1C	Unconventional myosin-Ic	0.920717	0.959874	0.0839299
O00231	PSMD11	26S proteasome non-ATPase regulatory subunit 11	0.613611	0.777891	0.472077
O00232	PSMD12	26S proteasome non-ATPase regulatory subunit 12	0.328035	0.550479	-1.55338
O00299	CLIC1	Chloride intracellular channel protein 1	0.539798	0.730219	0.442085
O00300	TNFRSF11B	Tumor necrosis factor receptor superfamily member 11B	0.373672	0.599044	-0.47017
O00303	EIF3F	Eukaryotic translation initiation factor 3 subunit F	0.0817002	0.251496	2.11536
O00339	MATN2	Matrilin-2	0.00978015	0.158357	1.78217	+
O00391	QSOX1	Sulfhydryl oxidase 1	0.02019	0.186316	-0.517445
O00410	IPO5	Importin-5	0.299169	0.520465	0.857238
O00462	MANBA	Beta-mannosidase	0.0753477	0.242278	-0.462743
O00468	AGRN	Agrin;Agrin N-terminal 110 kDa subunit;Agrin C-terminal 110 kDa subunit;Agrin C-terminal 90 kDa fragment;Agrin C-terminal 22 kDa fragment	0.153541	0.359207	-1.08915
O00469	PLOD2	Procollagen-lysine,2-oxoglutarate 5-dioxygenase 2	0.671168	0.829671	-0.501603
O00505	KPNA3	Importin subunit alpha-4	0.282275	0.513385	1.26379
O00560	SDCBP	Syntenin-1	0.922244	0.960289	-0.0388699
O00584	RNASET2	Ribonuclease T2	0.043585	0.2105	-1.29631	+
O00625	PIR	Pirin	0.573881	0.754188	0.305819
O00754	MAN2B1	Lysosomal alpha-mannosidase;Lysosomal alpha-mannosidase A peptide;Lysosomal alpha-mannosidase B peptide;Lysosomal alpha-mannosidase C peptide;Lysosomal alpha-mannosidase D peptide;Lysosomal alpha-mannosidase E peptide	0.113923	0.306418	-0.317507
O00764	PDXK	Pyridoxal kinase	0.334142	0.555486	0.671017
O14498	ISLR	Immunoglobulin superfamily containing leucine-rich repeat protein	0.428713	0.658007	-0.173091
O14579	COPE	Coatomer subunit epsilon	0.19714	0.413665	1.29701
O14657	TOR1B	Torsin-1B	0.723862	0.855186	0.265086
O14672	ADAM10	Disintegrin and metalloproteinase domain-containing protein 10	0.0302969	0.194533	-0.757881
O14773	TPP1	Tripeptidyl-peptidase 1	0.258659	0.491717	-0.26491
O14786	NRP1	Neuropilin-1	0.533944	0.729938	-0.158641
O14818;Q8TAA3	PSMA7;PSMA8	Proteasome subunit alpha type-7;Proteasome subunit alpha type-7-like	0.236858	0.464286	-1.05657
P19105;O14950	MYL12A;MYL12B	Myosin regulatory light chain 12A;Myosin regulatory light chain 12B	0.3202	0.5419	-1.20348
O14974	PPP1R12A	Protein phosphatase 1 regulatory subunit 12A	0.503806	0.718277	-1.246
O15031	PLXNB2	Plexin-B2	0.0168017	0.191077	-1.66707	+
O15143	ARPC1B	Actin-related protein 2/3 complex subunit 1B	0.949241	0.976152	-0.0360991
O15144	ARPC2	Actin-related protein 2/3 complex subunit 2	0.119907	0.309309	0.71638
O15232	MATN3	Matrilin-3	0.0024525	0.130154	-2.58218	+
O15460	P4HA2	Prolyl 4-hydroxylase subunit alpha-2	0.10349	0.28661	-1.35799
O43175	PHGDH	D-3-phosphoglycerate dehydrogenase	0.173113	0.38581	1.1756
O43184	ADAM12	Disintegrin and metalloproteinase domain-containing protein 12	0.0688665	0.239098	-1.02654
O43242	PSMD3	26S proteasome non-ATPase regulatory subunit 3	0.232399	0.462065	-0.736621
O43286;Q9UBX8	B4GALT5	Beta-1,4-galactosyltransferase 5	0.000440696	0.1928	-0.719475
O43396	TXNL1	Thioredoxin-like protein 1	0.2177	0.440933	1.11658
O43399	TPD52L2	Tumor protein D54	0.277832	0.50905	1.20741
O43505	B4GAT1	Beta-1,4-glucuronyltransferase 1	0.525733	0.728019	-0.162273
O43570	CA12	Carbonic anhydrase 12	0.295464	0.521048	-0.284093
O43707;Q9H254	ACTN4	Alpha-actinin-4	0.794751	0.891693	-0.0559025
O43747	AP1G1	AP-1 complex subunit gamma-1	0.515209	0.725076	0.546855
O43852	CALU	Calumenin	0.0679997	0.24205	-0.764907
O43854	EDIL3	EGF-like repeat and discoidin I-like domain-containing protein 3	0.456558	0.679834	-0.132352
O60506	SYNCRIP	Heterogeneous nuclear ribonucleoprotein Q	0.26117	0.490998	0.282296
O60568	PLOD3	Procollagen-lysine,2-oxoglutarate 5-dioxygenase 3	0.00809391	0.15096	-0.429949
O60664	PLIN3	Perilipin-3	0.858371	0.934459	-0.105347
O60684;O15131	KPNA6;KPNA5	Importin subunit alpha-7;Importin subunit alpha-6	0.788304	0.89572	0.174965
O60687	SRPX2	Sushi repeat-containing protein SRPX2	0.376402	0.600069	-0.0997473
O60701	UGDH	UDP-glucose 6-dehydrogenase	0.451982	0.676618	0.336327
O60763;REV__Q5VZ89	USO1	General vesicular transport factor p115	0.10349	0.285508	1.03431
O60784	TOM1	Target of Myb protein 1	0.334973	0.55657	0.476131
O60841	EIF5B	Eukaryotic translation initiation factor 5B	0.0654062	0.234444	0.806291
O60888	CUTA	Protein CutA	0.121315	0.309836	-0.388462
O75083	WDR1	WD repeat-containing protein 1	0.43658	0.665423	0.186335
O75094	SLIT3	Slit homolog 3 protein	0.216816	0.440229	-0.79661
O75116;Q13464	ROCK2	Rho-associated protein kinase 2	0.0382704	0.205072	0.831361
O75131	CPNE3	Copine-3	0.338577	0.557032	0.849537
O75326	SEMA7A	Semaphorin-7A	0.0736229	0.243472	-0.667107
O75368	SH3BGRL	SH3 domain-binding glutamic acid-rich-like protein	0.474728	0.696929	0.795259
O75369	FLNB	Filamin-B	0.540247	0.729642	0.101205
O75436;Q4G0F5	VPS26A	Vacuolar protein sorting-associated protein 26A	0.969313	0.981595	0.00712713
O75462	CRLF1	Cytokine receptor-like factor 1	0.0417778	0.206055	-0.437276
O75487	GPC4	Glypican-4;Secreted glypican-4	0.896403	0.949779	-0.0360794
O75503	CLN5	Ceroid-lipofuscinosis neuronal protein 5	0.0196787	0.18713	-0.512875
O75629	CREG1	Protein CREG1	0.0159377	0.191211	-1.15665	+
O75718	CRTAP	Cartilage-associated protein	0.862341	0.937723	0.181099
O75752	B3GALNT1	UDP-GalNAc:beta-1,3-N-acetylgalactosaminyltransferase 1	0.0876876	0.259884	-0.488111
O75787	ATP6AP2	Renin receptor	0.638286	0.79827	0.197845
O75874;P48735	IDH1	Isocitrate dehydrogenase [NADP] cytoplasmic	0.0367256	0.202147	0.91229
O75882	ATRN	Attractin	0.0681444	0.240851	-0.708817
O76003	GLRX3	Glutaredoxin-3	0.195132	0.412721	0.918386
O76061	STC2	Stanniocalcin-2	0.0672628	0.240804	-6.5105
O76076	WISP2	WNT1-inducible-signaling pathway protein 2	0.342515	0.55894	-1.91053
O94766	B3GAT3	Galactosylgalactosylxylosylprotein 3-beta-glucuronosyltransferase 3	0.136456	0.332579	2.71521
O94769	ECM2	Extracellular matrix protein 2	0.0685517	0.240276	-0.746023
O94856	NFASC	Neurofascin	0.0407042	0.207915	-2.16839	+
O94907;Q9UBU2	DKK1	Dickkopf-related protein 1	0.073742	0.242329	-3.23552
O94979	SEC31A	Protein transport protein Sec31A	0.950199	0.975495	-0.0776323
O94985	CLSTN1	Calsyntenin-1;Soluble Alc-alpha;CTF1-alpha	0.00133274	0.145412	-1.33592	+
O95084	PRSS23	Serine protease 23	0.0106518	0.157333	-0.704772
O95302;Q75LS8	FKBP9	Peptidyl-prolyl cis-trans isomerase FKBP9	0.163533	0.374823	-1.35989
O95336	PGLS	6-phosphogluconolactonase	0.728595	0.856402	0.354091
O95373;O15397	IPO7;IPO8	Importin-7;Importin-8	0.0217395	0.193253	1.21306	+
O95394	PGM3	Phosphoacetylglucosamine mutase	0.480239	0.697311	0.782725
O95433	AHSA1	Activator of 90 kDa heat shock protein ATPase homolog 1	0.398365	0.628893	-1.04462
O95450	ADAMTS2	A disintegrin and metalloproteinase with thrombospondin motifs 2	0.0178121	0.183952	-1.99398	+
O95602	POLR1A	DNA-directed RNA polymerase I subunit RPA1	0.491752	0.709139	1.68105
O95633	FSTL3	Follistatin-related protein 3	0.0602751	0.233643	-4.35341
O95671	ASMTL	N-acetylserotonin O-methyltransferase-like protein	0.1724	0.384312	-3.12428
O95747	OXSR1	Serine/threonine-protein kinase OSR1	0.48458	0.703613	-0.571484
O95782	AP2A1	AP-2 complex subunit alpha-1	0.848436	0.928083	0.144087
O95817	BAG3	BAG family molecular chaperone regulator 3	0.436094	0.665996	0.595786
O95831	AIFM1	Apoptosis-inducing factor 1, mitochondrial	0.374199	0.596567	0.258034
O95834	EML2	Echinoderm microtubule-associated protein-like 2	0.791523	0.89302	0.254627
O95841	ANGPTL1	Angiopoietin-related protein 1	0.253183	0.487827	-1.20572
O95965	ITGBL1	Integrin beta-like protein 1	0.0564236	0.226472	-6.03353
O95967	EFEMP2	EGF-containing fibulin-like extracellular matrix protein 2	0.0405299	0.208511	-0.570304
P00325;P07327	ADH1B;ADH1A	Alcohol dehydrogenase 1B;Alcohol dehydrogenase 1A	0.321708	0.542833	0.383732
P00338	LDHA	L-lactate dehydrogenase A chain	0.508018	0.721717	0.152611
P00390	GSR	Glutathione reductase, mitochondrial	0.0678625	0.24136	0.747781
P00441	SOD1	Superoxide dismutase [Cu-Zn]	0.337527	0.556719	-0.944421
P00491	PNP	Purine nucleoside phosphorylase	0.116841	0.303058	0.425126
P00505	GOT2	Aspartate aminotransferase, mitochondrial	0.433399	0.664386	-0.889992
P00558;P07205	PGK1	Phosphoglycerate kinase 1	0.438771	0.664734	0.289855
P00568	AK1	Adenylate kinase isoenzyme 1	0.883518	0.950981	0.102983
P00736	C1R	Complement C1r subcomponent;Complement C1r subcomponent heavy chain;Complement C1r subcomponent light chain	0.00326309	0.132258	-0.720619
P00738;P00739	HP	Haptoglobin;Haptoglobin alpha chain;Haptoglobin beta chain	0.189974	0.407933	-0.510338
P00746	CFD	Complement factor D	0.0172059	0.184	-0.800011
P00749	PLAU	Urokinase-type plasminogen activator;Urokinase-type plasminogen activator long chain A;Urokinase-type plasminogen activator short chain A;Urokinase-type plasminogen activator chain B	0.0155599	0.189892	-3.0267	+
P00751	CFB	Complement factor B;Complement factor B Ba fragment;Complement factor B Bb fragment	0.0628052	0.233853	-0.933957
P00966	ASS1	Argininosuccinate synthase	0.151743	0.360478	2.0004
P01009	SERPINA1	Alpha-1-antitrypsin;Short peptide from AAT	0.654305	0.808985	-0.184663
P01011	SERPINA3	Alpha-1-antichymotrypsin;Alpha-1-antichymotrypsin His-Pro-less	0.153515	0.360323	-0.507893
P01023	A2M	Alpha-2-macroglobulin	0.961855	0.976427	-0.0272742
P01024	C3	Complement C3;Complement C3 beta chain;C3-beta-c;Complement C3 alpha chain;C3a anaphylatoxin;Acylation stimulating protein;Complement C3b alpha chain;Complement C3c alpha chain fragment 1;Complement C3dg fragment;Complement C3g fragment;Complement C3d fragment;Complement C3f fragment;Complement C3c alpha chain fragment 2	0.0286656	0.197509	-0.790546
P01033	TIMP1	Metalloproteinase inhibitor 1	0.0181167	0.182047	-2.59711	+
P01034	CST3	Cystatin-C	0.00242373	0.13536	-1.30327	+
P01130	LDLR	Low-density lipoprotein receptor	0.0337284	0.198574	-1.41907	+
P01137	TGFB1	Transforming growth factor beta-1;Latency-associated peptide	0.0276904	0.197658	0.369537
P01344	IGF2	Insulin-like growth factor II;Insulin-like growth factor II;Insulin-like growth factor II Ala-25 Del;Preptin	0.0118202	0.171313	-2.08594	+
P02452;CON__Q862S4	COL1A1	Collagen alpha-1(I) chain	0.00991877	0.155579	-1.1488	+
P02458	COL2A1	Collagen alpha-1(II) chain;Collagen alpha-1(II) chain;Chondrocalcin	0.308629	0.529038	1.91149
P02461	COL3A1	Collagen alpha-1(III) chain	0.289147	0.516497	-0.493339
P02462	COL4A1	Collagen alpha-1(IV) chain;Arresten	0.0331789	0.202176	-2.14325	+
P02511	CRYAB	Alpha-crystallin B chain	0.253452	0.487292	0.562551
P02545	LMNA	Prelamin-A/C;Lamin-A/C	0.1203	0.309443	-0.233532
P02649	APOE	Apolipoprotein E	0.0402578	0.209114	1.21767	+
P02751	FN1	Fibronectin;Anastellin;Ugl-Y1;Ugl-Y2;Ugl-Y3	0.212473	0.434524	-0.447079
P02753	RBP4	Retinol-binding protein 4;Plasma retinol-binding protein(1-182);Plasma retinol-binding protein(1-181);Plasma retinol-binding protein(1-179);Plasma retinol-binding protein(1-176)	0.06317	0.235104	-1.91076
P02786	TFRC	Transferrin receptor protein 1;Transferrin receptor protein 1, serum form	0.0437594	0.209039	0.881874
P02787	TF	Serotransferrin	0.923167	0.960414	-0.217898
P04062	GBA	Glucosylceramidase	0.235753	0.46397	-1.35088
P04066	FUCA1	Tissue alpha-L-fucosidase	0.217905	0.439793	-0.296048
P04075	ALDOA	Fructose-bisphosphate aldolase A	0.477661	0.695987	-0.282752
P04083	ANXA1	Annexin A1	0.564128	0.749039	-0.407779
P04179	SOD2	Superoxide dismutase [Mn], mitochondrial	0.677015	0.834311	0.146345
P04216	THY1	Thy-1 membrane glycoprotein	0.122596	0.311675	-1.77354
P04406	GAPDH	Glyceraldehyde-3-phosphate dehydrogenase	0.18768	0.406532	0.56783
P04632;Q96L46	CAPNS1;CAPNS2	Calpain small subunit 1;Calpain small subunit 2	0.691245	0.845278	0.186683
P04792	HSPB1	Heat shock protein beta-1	0.437096	0.66557	0.264797
P04844	RPN2	Dolichyl-diphosphooligosaccharide--protein glycosyltransferase subunit 2	0.295503	0.520166	-0.0979424
P04899;P11488;P63096;P19087;P09471;P08754;A8MTJ3;P38405	GNAI2	Guanine nucleotide-binding protein G(i) subunit alpha-2	0.290488	0.515392	1.51055
P05067	APP	Amyloid beta A4 protein;N-APP;Soluble APP-alpha;Soluble APP-beta;C99;Beta-amyloid protein 42;Beta-amyloid protein 40;C83;P3(42);P3(40);C80;Gamma-secretase C-terminal fragment 59;Gamma-secretase C-terminal fragment 57;Gamma-secretase C-terminal fragment 50;C31	0.0764898	0.242294	-0.475697
P05090	APOD	Apolipoprotein D	0.848151	0.928905	0.116035
P05121	SERPINE1	Plasminogen activator inhibitor 1	0.00013512	0.116	-1.117	+
P05155	SERPING1	Plasma protease C1 inhibitor	0.461935	0.685478	-0.232393
P05156	CFI	Complement factor I;Complement factor I heavy chain;Complement factor I light chain	0.248208	0.47901	-1.85033
P05186	ALPL	Alkaline phosphatase, tissue-nonspecific isozyme	0.610018	0.774167	-0.644877
P05386	RPLP1	60S acidic ribosomal protein P1	0.572924	0.754455	-0.385999
P05387	RPLP2	60S acidic ribosomal protein P2	0.322243	0.542495	-0.273724
P05388;Q8NHW5	RPLP0	60S acidic ribosomal protein P0	0.523059	0.729809	0.167317
P05452	CLEC3B	Tetranectin	0.0114374	0.168581	-1.25678	+
P05556	ITGB1	Integrin beta-1	0.209116	0.430762	-0.806736
P05997	COL5A2	Collagen alpha-2(V) chain	0.0170698	0.188658	-0.917322
P06280	GLA	Alpha-galactosidase A	0.0807634	0.24978	-1.47193
P06396	GSN	Gelsolin	0.189541	0.40839	-0.253267
P06576	ATP5B	ATP synthase subunit beta, mitochondrial	0.401016	0.627933	-0.097496
P06703	S100A6	Protein S100-A6	0.0143342	0.188522	1.90982	+
P06733;P13929	ENO1	Alpha-enolase	0.437408	0.663823	0.204432
P06737	PYGL	Glycogen phosphorylase, liver form	0.116499	0.303418	2.1734
P06744;CON__Q3ZBD7	GPI	Glucose-6-phosphate isomerase	0.337266	0.557563	0.239464
P06748	NPM1	Nucleophosmin	0.274301	0.505462	-0.956904
P06756	ITGAV	Integrin alpha-V;Integrin alpha-V heavy chain;Integrin alpha-V light chain	0.841634	0.921443	-0.168125
P06865	HEXA	Beta-hexosaminidase subunit alpha	0.577204	0.756703	-0.0804113
P07093	SERPINE2	Glia-derived nexin	0.00727269	0.131667	-0.507604
P07195	LDHB	L-lactate dehydrogenase B chain	0.164393	0.375881	0.347202
P07225	PROS1	Vitamin K-dependent protein S	0.188098	0.405911	-0.339287
P07237	P4HB	Protein disulfide-isomerase	0.197075	0.414786	-0.312252
P07339	CTSD	Cathepsin D;Cathepsin D light chain;Cathepsin D heavy chain	0.0310737	0.19643	-0.492889
P07355;A6NMY6	ANXA2;ANXA2P2	Annexin A2;Putative annexin A2-like protein	0.518367	0.725363	0.140522
P07384	CAPN1	Calpain-1 catalytic subunit	0.785203	0.894556	0.324647
P07437;P68371;A6NNZ2;CON__ENSEMBL:ENSBTAP00000025008;Q9H4B7	TUBB;TUBB4B	Tubulin beta chain;Tubulin beta-4B chain	0.228662	0.459595	0.687105
P07585	DCN	Decorin	0.0188105	0.189045	-0.764273
P07602	PSAP	Prosaposin;Saposin-A;Saposin-B-Val;Saposin-B;Saposin-C;Saposin-D	0.176157	0.389937	-0.833731
P07686	HEXB	Beta-hexosaminidase subunit beta;Beta-hexosaminidase subunit beta chain B;Beta-hexosaminidase subunit beta chain A	0.0335847	0.200125	-0.400046
P07711	CTSL	Cathepsin L1;Cathepsin L1 heavy chain;Cathepsin L1 light chain	0.0416444	0.206648	-0.444703
P07737	PFN1	Profilin-1	0.576222	0.755958	-0.0897942
P07814	EPRS	Bifunctional glutamate/proline--tRNA ligase;Glutamate--tRNA ligase;Proline--tRNA ligase	0.559819	0.744714	0.790015
P07858	CTSB	Cathepsin B;Cathepsin B light chain;Cathepsin B heavy chain	0.0556981	0.227073	-0.574202
P07900;Q58FG0	HSP90AA1	Heat shock protein HSP 90-alpha	0.945405	0.975221	-0.021382
P07910;P0DMR1;O60812;B7ZW38;B2RXH8	HNRNPC;HNRNPCL4;HNRNPCL1;HNRNPCL3;HNRNPCL2	Heterogeneous nuclear ribonucleoproteins C1/C2;Heterogeneous nuclear ribonucleoprotein C-like 4;Heterogeneous nuclear ribonucleoprotein C-like 1;Heterogeneous nuclear ribonucleoprotein C-like 3;Heterogeneous nuclear ribonucleoprotein C-like 2	0.588801	0.753293	0.189592
P07942	LAMB1	Laminin subunit beta-1	0.0141795	0.191294	-0.656795
P07954	FH	Fumarate hydratase, mitochondrial	0.982273	0.98924	0.0347483
P08123;Q6P1N0	COL1A2	Collagen alpha-2(I) chain	0.0457094	0.210481	-0.801201
P08133	ANXA6	Annexin A6	0.828155	0.911433	0.0992101
P08195	SLC3A2	4F2 cell-surface antigen heavy chain	0.097282	0.279032	-0.157696
P08236	GUSB	Beta-glucuronidase	0.146656	0.353936	-0.779635
P08238;Q58FF7;Q14568;Q58FG1	HSP90AB1	Heat shock protein HSP 90-beta	0.798213	0.894304	0.0453269
P08253	MMP2	72 kDa type IV collagenase;PEX	0.0839979	0.259517	-0.480769
P08254;P09238	MMP3	Stromelysin-1	0.799039	0.893332	0.0930659
P08294	SOD3	Extracellular superoxide dismutase [Cu-Zn]	0.327531	0.550294	-0.368658
P08476	INHBA	Inhibin beta A chain	0.288775	0.517156	-0.312568
P08571	CD14	Monocyte differentiation antigen CD14;Monocyte differentiation antigen CD14, urinary form;Monocyte differentiation antigen CD14, membrane-bound form	0.101835	0.287844	-1.60988
P08572	COL4A2	Collagen alpha-2(IV) chain;Canstatin	0.0342729	0.197727	-0.662882
P08603;Q03591;Q02985	CFH	Complement factor H	0.0204338	0.185667	-2.83816	+
P08648	ITGA5	Integrin alpha-5;Integrin alpha-5 heavy chain;Integrin alpha-5 light chain	0.909588	0.953376	-0.1395
P08670;P41219;P17661;Q16352;P07197;CON__Q9H552;P07196;P12036	VIM	Vimentin	0.548194	0.739446	-0.216209
P08758	ANXA5	Annexin A5	0.437308	0.664816	0.447565
P08865	RPSA	40S ribosomal protein SA	0.704838	0.852543	0.23473
P08949	NMB	Neuromedin-B;Neuromedin-B-32;Neuromedin-B	0.957383	0.976634	-0.0536764
P09211	GSTP1	Glutathione S-transferase P	0.524358	0.729838	0.374624
P09382	LGALS1	Galectin-1	0.354495	0.578107	-0.173282
P09486	SPARC	SPARC	0.00698971	0.134468	-1.05626	+
P09493	TPM1	Tropomyosin alpha-1 chain	0.646491	0.803876	-0.568164
P09603	CSF1	Macrophage colony-stimulating factor 1;Processed macrophage colony-stimulating factor 1	0.0219025	0.1938	-1.60183	+
P09619	PDGFRB	Platelet-derived growth factor receptor beta	0.77835	0.889673	-0.107361
P09622	DLD	Dihydrolipoyl dehydrogenase, mitochondrial	0.00411566	0.133257	-3.11879	+
P09651;Q32P51;A0A2R8Y4L2	HNRNPA1;HNRNPA1L2	Heterogeneous nuclear ribonucleoprotein A1;Heterogeneous nuclear ribonucleoprotein A1, N-terminally processed;Heterogeneous nuclear ribonucleoprotein A1-like 2	0.700136	0.84842	-0.153879
P09871	C1S	Complement C1s subcomponent;Complement C1s subcomponent heavy chain;Complement C1s subcomponent light chain	0.00636326	0.132	-0.803343
P09936	UCHL1	Ubiquitin carboxyl-terminal hydrolase isozyme L1	0.726021	0.855745	0.315933
P09960	LTA4H	Leukotriene A-4 hydrolase	0.453099	0.675896	0.526711
P0C0L4;P0C0L5	C4A;C4B	Complement C4-A;Complement C4 beta chain;Complement C4-A alpha chain;C4a anaphylatoxin;C4b-A;C4d-A;Complement C4 gamma chain;Complement C4-B;Complement C4 beta chain;Complement C4-B alpha chain;C4a anaphylatoxin;C4b-B;C4d-B;Complement C4 gamma chain	0.768665	0.885608	0.137761
P62987;P62979;P0CG47;P0CG48	UBA52;RPS27A;UBB;UBC	Ubiquitin-60S ribosomal protein L40;Ubiquitin;60S ribosomal protein L40;Ubiquitin-40S ribosomal protein S27a;Ubiquitin;40S ribosomal protein S27a;Polyubiquitin-B;Ubiquitin;Polyubiquitin-C;Ubiquitin	0.0437209	0.210405	-0.779811
P0DJI8	SAA1	Serum amyloid A-1 protein;Amyloid protein A;Serum amyloid protein A(2-104);Serum amyloid protein A(3-104);Serum amyloid protein A(2-103);Serum amyloid protein A(2-102);Serum amyloid protein A(4-101)	0.0801549	0.249813	-2.35933
P0DMV9;P0DMV8	HSPA1B;HSPA1A	Heat shock 70 kDa protein 1B;Heat shock 70 kDa protein 1A	0.370465	0.597217	0.303356
P0DP25;P0DP24;P0DP23			0.453019	0.677068	1.19813
P10124	SRGN	Serglycin	0.063294	0.233886	-1.48178
P10253	GAA	Lysosomal alpha-glucosidase;76 kDa lysosomal alpha-glucosidase;70 kDa lysosomal alpha-glucosidase	0.168319	0.378839	-0.248796
P10321	HLA-C	HLA class I histocompatibility antigen, Cw-7 alpha chain	0.873362	0.945978	-0.0954158
P10599	TXN	Thioredoxin	0.477129	0.6985	-0.426093
P10619	CTSA	Lysosomal protective protein;Lysosomal protective protein 32 kDa chain;Lysosomal protective protein 20 kDa chain	0.220539	0.446375	-0.367222
P10644	PRKAR1A	cAMP-dependent protein kinase type I-alpha regulatory subunit;cAMP-dependent protein kinase type I-alpha regulatory subunit, N-terminally processed	0.423904	0.65563	1.16694
P10646	TFPI	Tissue factor pathway inhibitor	0.385732	0.612806	-0.279162
P10809	HSPD1	60 kDa heat shock protein, mitochondrial	0.0625468	0.233418	-1.32555
P10909	CLU	Clusterin;Clusterin beta chain;Clusterin alpha chain	0.484661	0.702676	-0.154964
P10915	HAPLN1	Hyaluronan and proteoglycan link protein 1	0.0465551	0.210882	-2.65866	+
P11021	HSPA5	78 kDa glucose-regulated protein	0.0464476	0.2122	-0.308911
P11047;Q9Y6N6	LAMC1	Laminin subunit gamma-1	0.00762132	0.141388	-0.761993
P11142	HSPA8	Heat shock cognate 71 kDa protein	0.309744	0.528864	0.304668
P11216;P11217	PYGB	Glycogen phosphorylase, brain form	0.0519125	0.221977	0.84388
P11279	LAMP1	Lysosome-associated membrane glycoprotein 1	0.227218	0.459003	-0.481823
P11413	G6PD	Glucose-6-phosphate 1-dehydrogenase	0.0410047	0.207301	1.02391	+
P11766	ADH5	Alcohol dehydrogenase class-3	0.48203	0.699846	-0.633501
P11940;Q4VXU2;Q9H361;Q5JQF8;Q96DU9	PABPC1	Polyadenylate-binding protein 1	0.19537	0.411935	-0.675948
P12081;P49590	HARS	Histidine--tRNA ligase, cytoplasmic	0.0706559	0.238423	1.91731
P12107;P13942	COL11A1	Collagen alpha-1(XI) chain	0.0205774	0.183753	-0.946272
P12109	COL6A1	Collagen alpha-1(VI) chain	0.00877321	0.153509	-0.436232
P12110	COL6A2	Collagen alpha-2(VI) chain	0.585679	0.7559	-0.0997944
P12111	COL6A3	Collagen alpha-3(VI) chain	0.459318	0.683339	0.154432
P12277	CKB	Creatine kinase B-type	0.496596	0.715703	-0.667113
P12814;P35609;Q08043	ACTN1	Alpha-actinin-1	0.336904	0.557996	-0.150665
P12955	PEPD	Xaa-Pro dipeptidase	0.320371	0.540768	0.440716
P12956	XRCC6	X-ray repair cross-complementing protein 6	0.280862	0.513245	0.83655
P13010	XRCC5	X-ray repair cross-complementing protein 5	0.630839	0.790966	0.48838
P13473	LAMP2	Lysosome-associated membrane glycoprotein 2	0.126223	0.32221	-1.65962
P13489	RNH1	Ribonuclease inhibitor	0.362628	0.588634	-1.32352
P13497;Q9Y6L7;O43897	BMP1	Bone morphogenetic protein 1	0.00289157	0.127867	-1.03773	+
P13521	SCG2	Secretogranin-2;Secretoneurin;Manserin	0.301217	0.521268	-0.342389
P13611	VCAN	Versican core protein	0.0179729	0.183247	-1.33563	+
P13639	EEF2	Elongation factor 2	0.519157	0.725169	0.301027
P13667	PDIA4	Protein disulfide-isomerase A4	0.723418	0.855973	-0.555731
P13693	TPT1	Translationally-controlled tumor protein	0.142229	0.347065	-1.83528
P13797;P13796;Q14651	PLS3	Plastin-3	0.984117	0.98977	0.0191727
P13798	APEH	Acylamino-acid-releasing enzyme	0.132194	0.333891	-1.78101
P14174	MIF	Macrophage migration inhibitory factor	0.694739	0.846272	-0.877595
P14384	CPM	Carboxypeptidase M	0.241322	0.469663	-0.331186
P14543	NID1	Nidogen-1	0.125636	0.321746	-0.414715
P14550	AKR1A1	Alcohol dehydrogenase [NADP(+)]	0.454629	0.677416	1.21357
P14618;P30613	PKM	Pyruvate kinase PKM	0.243481	0.471727	0.385836
P14625;Q58FF3	HSP90B1	Endoplasmin	0.086086	0.258403	-0.462166
P14868	DARS	Aspartate--tRNA ligase, cytoplasmic	0.285505	0.514978	1.28367
P14923	JUP	Junction plakoglobin	0.131619	0.333706	-0.839659
P15104	GLUL	Glutamine synthetase	0.331719	0.554889	-1.18808
P15144	ANPEP	Aminopeptidase N	0.471393	0.694664	0.123287
P15170	GSPT1	Eukaryotic peptide chain release factor GTP-binding subunit ERF3A	0.958649	0.976893	0.0756575
P15289	ARSA	Arylsulfatase A;Arylsulfatase A component B;Arylsulfatase A component C	0.0011586	0.155467	-0.70882
P15291	B4GALT1	Beta-1,4-galactosyltransferase 1;Lactose synthase A protein;N-acetyllactosamine synthase;Beta-N-acetylglucosaminylglycopeptide beta-1,4-galactosyltransferase;Beta-N-acetylglucosaminyl-glycolipid beta-1,4-galactosyltransferase;Processed beta-1,4-galactosyltransferase 1	0.00055919	0.1088	-0.945946
P15311	EZR	Ezrin	0.583758	0.758556	-0.277693
P15374	UCHL3	Ubiquitin carboxyl-terminal hydrolase isozyme L3	0.411607	0.64127	0.868374
P15502	ELN	Elastin	0.0192749	0.190292	-3.47874	+
P15531	NME1	Nucleoside diphosphate kinase A	0.0432895	0.208768	0.980879
P15586	GNS	N-acetylglucosamine-6-sulfatase	0.215224	0.438726	-0.514415
P15848	ARSB	Arylsulfatase B	0.000280161	0.201333	-0.823075
P15880	RPS2	40S ribosomal protein S2	0.445237	0.670211	-1.14316
P15924	DSP	Desmoplakin	0.88684	0.947986	-0.144832
P16035	TIMP2	Metalloproteinase inhibitor 2	0.0269446	0.1984	-1.92145	+
P16070	CD44	CD44 antigen	0.333837	0.556409	0.486546
P16112	ACAN	Aggrecan core protein;Aggrecan core protein 2	0.041947	0.20327	-1.25301	+
P16152;O75828	CBR1	Carbonyl reductase [NADPH] 1	0.904048	0.953615	0.0863037
P16234	PDGFRA	Platelet-derived growth factor receptor alpha	0.649186	0.806676	0.197884
P16278	GLB1	Beta-galactosidase	0.726489	0.855004	-0.105324
P16403;P10412;P16402	HIST1H1C;HIST1H1E;HIST1H1D	Histone H1.2;Histone H1.4;Histone H1.3	0.588317	0.755492	1.31947
P16930	FAH	Fumarylacetoacetase	0.329814	0.553146	0.355942
P17050	NAGA	Alpha-N-acetylgalactosaminidase	0.0808999	0.249193	-2.88947
P17174	GOT1	Aspartate aminotransferase, cytoplasmic	0.927643	0.96334	-0.129595
P17342	NPR3	Atrial natriuretic peptide receptor 3	0.908032	0.952992	-0.0148754
P17405	SMPD1	Sphingomyelin phosphodiesterase	0.0806399	0.250354	-0.483
P17655	CAPN2	Calpain-2 catalytic subunit	0.227087	0.460173	0.736718
P17813	ENG	Endoglin	0.881624	0.951234	-0.135269
P17900	GM2A	Ganglioside GM2 activator;Ganglioside GM2 activator isoform short	0.057167	0.227732	-0.452913
P17931	LGALS3	Galectin-3	0.9877	0.9933	-0.006368
P17936	IGFBP3	Insulin-like growth factor-binding protein 3	0.0101494	0.156414	-1.727	+
P17980	PSMC3	26S protease regulatory subunit 6A	0.349442	0.568784	1.19326
P17987	TCP1	T-complex protein 1 subunit alpha	0.822701	0.90682	-0.220203
P18065	IGFBP2	Insulin-like growth factor-binding protein 2	0.0604003	0.232387	-2.72219
P18084	ITGB5	Integrin beta-5	0.159111	0.365426	0.612698
P18085	ARF4	ADP-ribosylation factor 4	0.394892	0.622511	0.870485
P18124	RPL7	60S ribosomal protein L7	0.233323	0.462175	0.812985
P18206	VCL	Vinculin	0.907435	0.953496	0.0277627
P18428	LBP	Lipopolysaccharide-binding protein	0.0441607	0.20849	-0.579321
P18669;Q8N0Y7;P15259	PGAM1	Phosphoglycerate mutase 1	0.13462	0.330954	1.09338
P19021	PAM	Peptidyl-glycine alpha-amidating monooxygenase;Peptidylglycine alpha-hydroxylating monooxygenase;Peptidyl-alpha-hydroxyglycine alpha-amidating lyase	0.00362413	0.1395	-0.416247
P19022	CDH2	Cadherin-2	0.0211542	0.188122	-0.908422
P19320	VCAM1	Vascular cell adhesion protein 1	0.00548635	0.136381	-0.677226
P19338	NCL	Nucleolin	0.0850802	0.258481	-0.616942
P19367;P52789	HK1	Hexokinase-1	0.554918	0.741339	0.167742
P19623	SRM	Spermidine synthase	0.0929767	0.272813	1.44751
P19883	FST	Follistatin	0.000499164	0.137714	-2.8318	+
P20774	OGN	Mimecan	0.0171148	0.1863	-3.0737	+
P20810	CAST	Calpastatin	0.725336	0.856037	0.372681
P20908	COL5A1	Collagen alpha-1(V) chain	0.00839481	0.157255	-0.678893
P21281;P15313	ATP6V1B2	V-type proton ATPase subunit B, brain isoform	0.187443	0.40709	1.01588
P21291	CSRP1	Cysteine and glycine-rich protein 1	0.962794	0.975927	-0.0116374
P21333	FLNA	Filamin-A	0.530827	0.729287	-0.146904
P21399	ACO1	Cytoplasmic aconitate hydratase	0.79198	0.892464	0.170136
P21583	KITLG	Kit ligand;Soluble KIT ligand	0.232202	0.463035	0.351293
P21589	NT5E	5-nucleotidase	0.145067	0.350688	1.54872
P21810	BGN	Biglycan	0.00848578	0.154231	-0.907043
P21980	TGM2	Protein-glutamine gamma-glutamyltransferase 2	0.211788	0.433323	-0.791466
P22234	PAICS	Multifunctional protein ADE2;Phosphoribosylaminoimidazole-succinocarboxamide synthase;Phosphoribosylaminoimidazole carboxylase	0.247964	0.479566	0.539602
P22314	UBA1	Ubiquitin-like modifier-activating enzyme 1	0.244975	0.474359	0.710213
P22392;O60361	NME2	Nucleoside diphosphate kinase B	0.284237	0.515721	0.417665
P22413	ENPP1	Ectonucleotide pyrophosphatase/phosphodiesterase family member 1;Alkaline phosphodiesterase I;Nucleotide pyrophosphatase	0.439033	0.663923	0.378496
P22626	HNRNPA2B1	Heterogeneous nuclear ribonucleoproteins A2/B1	0.227512	0.458041	-0.339657
P22692	IGFBP4	Insulin-like growth factor-binding protein 4	0.0113737	0.16741	-2.30764	+
P22792	CPN2	Carboxypeptidase N subunit 2	0.130464	0.332137	-0.758984
P22894	MMP8	Neutrophil collagenase	0.285411	0.515856	-1.09454
P23142	FBLN1	Fibulin-1	0.0246085	0.198991	-1.58507	+
P23246	SFPQ	Splicing factor, proline- and glutamine-rich	0.883614	0.949839	-0.108647
P23284	PPIB	Peptidyl-prolyl cis-trans isomerase B	0.450258	0.678601	0.457216
P23381	WARS	Tryptophan--tRNA ligase, cytoplasmic;T1-TrpRS;T2-TrpRS	0.494279	0.713534	0.404655
P23396	RPS3	40S ribosomal protein S3	0.555681	0.742024	0.162186
P23470	PTPRG	Receptor-type tyrosine-protein phosphatase gamma	0.503824	0.717107	-0.140951
P23526	AHCY	Adenosylhomocysteinase	0.96558	0.978703	0.0264626
P23528	CFL1	Cofilin-1	0.311057	0.530241	0.465989
P23588	EIF4B	Eukaryotic translation initiation factor 4B	0.000506181	0.1205	2.37016	+
P24043	LAMA2	Laminin subunit alpha-2	0.53279	0.730034	0.136585
P24534	EEF1B2	Elongation factor 1-beta	0.556426	0.7419	-0.388784
P24592	IGFBP6	Insulin-like growth factor-binding protein 6	0.0459376	0.213031	-4.08624	+
P24821	TNC	Tenascin	0.0622367	0.23466	-0.416134
P25398	RPS12	40S ribosomal protein S12	0.642051	0.801966	-0.735006
P25705	ATP5A1	ATP synthase subunit alpha, mitochondrial	0.411467	0.642235	-1.04174
P25774	CTSS	Cathepsin S	0.877418	0.949052	-0.210269
P25787	PSMA2	Proteasome subunit alpha type-2	0.14871	0.356217	-0.40889
P25789	PSMA4	Proteasome subunit alpha type-4	0.589358	0.753337	-0.609203
P25940	COL5A3	Collagen alpha-3(V) chain	0.0285241	0.199257	-0.803064
P26022	PTX3	Pentraxin-related protein PTX3	0.00449556	0.129405	-0.82296
P26038	MSN	Moesin	0.260735	0.491568	0.0784289
P26572	MGAT1	Alpha-1,3-mannosyl-glycoprotein 2-beta-N-acetylglucosaminyltransferase	0.190602	0.408964	-0.892203
P26599	PTBP1	Polypyrimidine tract-binding protein 1	0.771208	0.885923	0.254389
P26640	VARS	Valine--tRNA ligase	0.0150495	0.192563	2.22271	+
P26641	EEF1G	Elongation factor 1-gamma	0.247736	0.480261	0.467813
P27348;P31947	YWHAQ	14-3-3 protein theta	0.586251	0.756094	-0.597698
P27658	COL8A1	Collagen alpha-1(VIII) chain;Vastatin	0.211001	0.433105	-0.438142
P27708	CAD	CAD protein;Glutamine-dependent carbamoyl-phosphate synthase;Aspartate carbamoyltransferase;Dihydroorotase	0.19371	0.412341	0.764128
P27797	CALR	Calreticulin	0.00106447	0.160923	-0.570143
P27816	MAP4	Microtubule-associated protein 4	0.914967	0.955167	-0.129152
P28300	LOX	Protein-lysine 6-oxidase	0.00215781	0.141	-0.69958
P28799	GRN	Granulins;Acrogranin;Paragranulin;Granulin-1;Granulin-2;Granulin-3;Granulin-4;Granulin-5;Granulin-6;Granulin-7	0.184737	0.402377	-3.24443
P28838	LAP3	Cytosol aminopeptidase	0.579972	0.757706	-0.564984
P29279	CTGF	Connective tissue growth factor	0.0629207	0.233759	-4.61175
P29401	TKT	Transketolase	0.583655	0.75968	0.0850868
P29692	EEF1D	Elongation factor 1-delta	0.994074	0.995852	-0.00469017
P30040	ERP29	Endoplasmic reticulum resident protein 29	0.594812	0.757181	0.567895
P30041	PRDX6	Peroxiredoxin-6	0.790489	0.894733	-0.118162
P30043	BLVRB	Flavin reductase (NADPH)	0.590127	0.753086	0.590654
P30044	PRDX5	Peroxiredoxin-5, mitochondrial	0.826675	0.910575	-0.169448
P30048	PRDX3	Thioredoxin-dependent peroxide reductase, mitochondrial	0.335808	0.556528	0.790372
P30050	RPL12	60S ribosomal protein L12	0.75085	0.875404	0.0758953
P30085	CMPK1	UMP-CMP kinase	0.23671	0.465089	1.82526
P30086	PEBP1	Phosphatidylethanolamine-binding protein 1;Hippocampal cholinergic neurostimulating peptide	0.136905	0.333731	-0.36688
P30101	PDIA3	Protein disulfide-isomerase A3	0.0702437	0.239575	-0.482796
P30153;P30154	PPP2R1A	Serine/threonine-protein phosphatase 2A 65 kDa regulatory subunit A alpha isoform	0.973439	0.984443	-0.0505479
P30530	AXL	Tyrosine-protein kinase receptor UFO	0.719234	0.855213	-0.171251
P30740;P50452;P50453;O75830	SERPINB1	Leukocyte elastase inhibitor	0.539577	0.73135	0.257104
P31150	GDI1	Rab GDP dissociation inhibitor alpha	0.356783	0.580086	-1.35088
P31939	ATIC	Bifunctional purine biosynthesis protein PURH;Phosphoribosylaminoimidazolecarboxamide formyltransferase;IMP cyclohydrolase	0.158041	0.363673	0.962994
P31946	YWHAB	14-3-3 protein beta/alpha;14-3-3 protein beta/alpha, N-terminally processed	0.793335	0.892166	0.294464
P31949	S100A11	Protein S100-A11;Protein S100-A11, N-terminally processed	0.179537	0.39314	-1.99497
P32119	PRDX2	Peroxiredoxin-2	0.812464	0.904479	-0.048282
P33176;O60282;Q12840	KIF5B	Kinesin-1 heavy chain	0.756818	0.878533	0.21574
P33908	MAN1A1	Mannosyl-oligosaccharide 1,2-alpha-mannosidase IA	0.129236	0.329141	-0.312901
P34059	GALNS	N-acetylgalactosamine-6-sulfatase	0.16515	0.375169	-0.491121
P34096	RNASE4	Ribonuclease 4	0.0475752	0.209767	-0.923743
P34932	HSPA4	Heat shock 70 kDa protein 4	0.194061	0.411704	0.412882
P35052	GPC1	Glypican-1;Secreted glypican-1	0.266485	0.49613	-0.221197
P35080	PFN2	Profilin-2	0.219304	0.444577	1.6803
P35222	CTNNB1	Catenin beta-1	0.515712	0.724887	0.446023
P35237	SERPINB6	Serpin B6	0.109347	0.300151	0.706643
P35241	RDX	Radixin	0.618975	0.780819	0.45453
P35442	THBS2	Thrombospondin-2	0.0115593	0.170095	-0.464177
P35475	IDUA	Alpha-L-iduronidase	0.0413705	0.207222	-0.409755
P35555	FBN1	Fibrillin-1	0.0355279	0.200361	-2.6494	+
P35556	FBN2	Fibrillin-2	0.0827238	0.25342	-2.60767
P35579;P35749	MYH9	Myosin-9	0.141302	0.343961	-0.244822
P35606	COPB2	Coatomer subunit beta	0.133102	0.330702	0.454297
P35611	ADD1	Alpha-adducin	0.760389	0.879819	0.296793
P35754	GLRX	Glutaredoxin-1	0.413015	0.643377	1.29691
P35998	PSMC2	26S protease regulatory subunit 7	0.338758	0.556354	1.24045
P36222	CHI3L1	Chitinase-3-like protein 1	0.582866	0.760178	0.157444
P36578	RPL4	60S ribosomal protein L4	0.695938	0.845828	-0.470185
P36871	PGM1	Phosphoglucomutase-1	0.0595031	0.236177	1.04306
P36873;P62140;P62136	PPP1CC;PPP1CB;PPP1CA	Serine/threonine-protein phosphatase PP1-gamma catalytic subunit;Serine/threonine-protein phosphatase PP1-beta catalytic subunit;Serine/threonine-protein phosphatase PP1-alpha catalytic subunit	0.839632	0.919666	-0.248573
P36955	SERPINF1	Pigment epithelium-derived factor	0.279531	0.510296	-0.376454
P37802	TAGLN2	Transgelin-2	0.891329	0.94881	0.199879
P37837	TALDO1	Transaldolase	0.437476	0.66265	0.90401
P38571	LIPA	Lysosomal acid lipase/cholesteryl ester hydrolase	0.363402	0.588359	-0.559888
P38606	ATP6V1A	V-type proton ATPase catalytic subunit A	0.41654	0.64867	-1.12608
P38646	HSPA9	Stress-70 protein, mitochondrial	0.414225	0.645024	0.368115
P39060	COL18A1	Collagen alpha-1(XVIII) chain;Endostatin	0.37386	0.596745	0.31355
P40121	CAPG	Macrophage-capping protein	0.706828	0.851897	0.122396
P40227;Q92526	CCT6A	T-complex protein 1 subunit zeta	0.0650265	0.236837	0.596998
P40261	NNMT	Nicotinamide N-methyltransferase	0.693699	0.845555	0.306882
P40925	MDH1	Malate dehydrogenase, cytoplasmic	0.931419	0.964719	-0.0210107
P40926	MDH2	Malate dehydrogenase, mitochondrial	0.94323	0.973619	-0.0171432
P40939	HADHA	Trifunctional enzyme subunit alpha, mitochondrial;Long-chain enoyl-CoA hydratase;Long chain 3-hydroxyacyl-CoA dehydrogenase	0.155937	0.361693	-1.65133
Q2VIR3;P41091	EIF2S3L;EIF2S3	Putative eukaryotic translation initiation factor 2 subunit 3-like protein;Eukaryotic translation initiation factor 2 subunit 3	0.191171	0.409691	1.15841
P41221;O00755	WNT5A	Protein Wnt-5a	0.0944602	0.27441	-1.79741
P41222	PTGDS	Prostaglandin-H2 D-isomerase	0.0768488	0.241164	-0.664355
P41250	GARS	Glycine--tRNA ligase	0.679938	0.831873	0.153918
P41252	IARS	Isoleucine--tRNA ligase, cytoplasmic	0.703201	0.850824	0.472229
P42224	STAT1	Signal transducer and activator of transcription 1-alpha/beta	0.854183	0.931396	0.249501
P42330;P17516	AKR1C3	Aldo-keto reductase family 1 member C3	0.113953	0.305279	1.64488
P42785	PRCP	Lysosomal Pro-X carboxypeptidase	0.00513433	0.136683	-0.620196
P43026	GDF5	Growth/differentiation factor 5	0.538002	0.733337	-0.49975
P43034	PAFAH1B1	Platelet-activating factor acetylhydrolase IB subunit alpha	0.315956	0.536756	1.40126
P43121	MCAM	Cell surface glycoprotein MUC18	0.127626	0.327377	1.21508
P43234	CTSO	Cathepsin O	0.00110513	0.158286	-3.09798	+
P43235	CTSK	Cathepsin K	0.215546	0.437906	0.541498
P43251	BTD	Biotinidase	0.450554	0.675242	-0.213201
P43490	NAMPT	Nicotinamide phosphoribosyltransferase	0.21059	0.433636	0.457018
P43686	PSMC4	26S protease regulatory subunit 6B	0.128018	0.327297	0.949069
P45452	MMP13	Collagenase 3	0.0420555	0.201253	2.93203	+
P45877	PPIC	Peptidyl-prolyl cis-trans isomerase C	0.763618	0.882846	0.0514062
P45974;Q92995	USP5	Ubiquitin carboxyl-terminal hydrolase 5	0.517961	0.727114	0.513366
P46108	CRK	Adapter molecule crk	0.47728	0.697518	-0.488128
P46777	RPL5	60S ribosomal protein L5	0.232772	0.46192	-1.41406
P46781	RPS9	40S ribosomal protein S9	0.258131	0.490355	1.30255
P46783;Q9NQ39	RPS10;RPS10P5	40S ribosomal protein S10;Putative 40S ribosomal protein S10-like	0.885959	0.948388	0.220113
P46821	MAP1B	Microtubule-associated protein 1B;MAP1B heavy chain;MAP1 light chain LC1	0.0800655	0.250929	0.497313
P46940	IQGAP1	Ras GTPase-activating-like protein IQGAP1	0.476302	0.698267	0.198771
P46976	GYG1	Glycogenin-1	0.319709	0.541493	-1.14928
P47755	CAPZA2	F-actin-capping protein subunit alpha-2	0.491358	0.709725	0.351029
P47756	CAPZB	F-actin-capping protein subunit beta	0.17862	0.392994	-3.09467
P47897	QARS	Glutamine--tRNA ligase	0.112645	0.304779	1.22437
P48147	PREP	Prolyl endopeptidase	0.672904	0.830598	0.0843086
P48163	ME1	NADP-dependent malic enzyme	0.149877	0.358578	0.482752
P48444	ARCN1	Coatomer subunit delta	0.3393	0.555711	0.701036
P48507	GCLM	Glutamate--cysteine ligase regulatory subunit	0.114478	0.303469	1.63182
P48643	CCT5	T-complex protein 1 subunit epsilon	0.778364	0.888536	0.176359
P48723	HSPA13	Heat shock 70 kDa protein 13	0.0943821	0.275516	-0.374179
P48739	PITPNB	Phosphatidylinositol transfer protein beta isoform	0.3772	0.600771	-0.828652
P49327	FASN	Fatty acid synthase;[Acyl-carrier-protein] S-acetyltransferase;[Acyl-carrier-protein] S-malonyltransferase;3-oxoacyl-[acyl-carrier-protein] synthase;3-oxoacyl-[acyl-carrier-protein] reductase;3-hydroxyacyl-[acyl-carrier-protein] dehydratase;Enoyl-[acyl-carrier-protein] reductase;Oleoyl-[acyl-carrier-protein] hydrolase	0.198252	0.415547	1.47186
P49368	CCT3	T-complex protein 1 subunit gamma	0.900424	0.951915	0.0501633
P49588	AARS	Alanine--tRNA ligase, cytoplasmic	0.943186	0.974513	0.0748146
P49589	CARS	Cysteine--tRNA ligase, cytoplasmic	0.0551974	0.226773	1.56808
P49591	SARS	Serine--tRNA ligase, cytoplasmic	0.0809142	0.248105	1.13395
P49746	THBS3	Thrombospondin-3	0.00281155	0.142074	-0.971746
P49747	COMP	Cartilage oligomeric matrix protein	0.00142042	0.1298	-1.75286	+
P50395	GDI2	Rab GDP dissociation inhibitor beta	0.821421	0.907856	0.0480525
P50454	SERPINH1	Serpin H1	0.0419549	0.201906	-0.525958
P50479	PDLIM4	PDZ and LIM domain protein 4	0.514828	0.726123	0.81707
P50552	VASP	Vasodilator-stimulated phosphoprotein	0.68124	0.832646	-0.170698
P50990	CCT8	T-complex protein 1 subunit theta	0.206904	0.426907	0.666332
P50991	CCT4	T-complex protein 1 subunit delta	0.394686	0.623307	0.309206
P51149	RAB7A	Ras-related protein Rab-7a	0.623232	0.785086	0.201689
P51665	PSMD7	26S proteasome non-ATPase regulatory subunit 7	0.567357	0.750099	0.609199
P51688	SGSH	N-sulphoglucosamine sulphohydrolase	0.102498	0.286093	-0.467241
P51858	HDGF	Hepatoma-derived growth factor	0.0700733	0.240738	-0.781714
P51884	LUM	Lumican	0.114113	0.304148	-0.564041
P51888	PRELP	Prolargin	0.290667	0.514532	-1.25939
P52209	PGD	6-phosphogluconate dehydrogenase, decarboxylating	0.0445453	0.210359	1.03153	+
P52294	KPNA1	Importin subunit alpha-5;Importin subunit alpha-5, N-terminally processed	0.00610953	0.132545	1.09674	+
P52434	POLR2H	DNA-directed RNA polymerases I, II, and III subunit RPABC3	0.028784	0.197009	1.26575	+
P52565	ARHGDIA	Rho GDP-dissociation inhibitor 1	0.693218	0.846014	-0.124143
P52907	CAPZA1	F-actin-capping protein subunit alpha-1	0.468176	0.69241	-1.04961
P52943	CRIP2	Cysteine-rich protein 2	0.382688	0.609097	1.45548
P53396	ACLY	ATP-citrate synthase	0.736061	0.86448	0.260836
P53618	COPB1	Coatomer subunit beta	0.229467	0.459657	1.36189
P53621	COPA	Coatomer subunit alpha;Xenin;Proxenin	0.622041	0.784504	0.421092
P53634	CTSC	Dipeptidyl peptidase 1;Dipeptidyl peptidase 1 exclusion domain chain;Dipeptidyl peptidase 1 heavy chain;Dipeptidyl peptidase 1 light chain	0.570982	0.754781	-0.514963
P54727	RAD23B	UV excision repair protein RAD23 homolog B	0.76423	0.882848	-0.141051
P54802	NAGLU	Alpha-N-acetylglucosaminidase;Alpha-N-acetylglucosaminidase 82 kDa form;Alpha-N-acetylglucosaminidase 77 kDa form	0.72146	0.855915	-0.0501417
P54803	GALC	Galactocerebrosidase	0.627039	0.786896	0.82919
P55058	PLTP	Phospholipid transfer protein	0.0160407	0.190338	0.725388
P55060	CSE1L	Exportin-2	0.168049	0.3792	1.11609
P55072	VCP	Transitional endoplasmic reticulum ATPase	0.911831	0.954664	0.0190913
P55083	MFAP4	Microfibril-associated glycoprotein 4	0.0712578	0.240191	-1.15842
P55209	NAP1L1	Nucleosome assembly protein 1-like 1	0.885899	0.949523	-0.204334
P55263	ADK	Adenosine kinase	0.757392	0.878005	-0.447432
P55268	LAMB2	Laminin subunit beta-2	0.0242162	0.203538	-0.754011
P55287	CDH11	Cadherin-11	0.0297691	0.196102	-0.613202
P55290	CDH13	Cadherin-13	0.283281	0.514582	0.456529
P55735	SEC13	Protein SEC13 homolog	0.888725	0.94885	-0.151323
P55786;A6NEC2	NPEPPS	Puromycin-sensitive aminopeptidase	0.0750982	0.241805	1.75026
P56537	EIF6	Eukaryotic translation initiation factor 6	0.819778	0.907485	0.121021
P58215	LOXL3	Lysyl oxidase homolog 3	0.0862727	0.257808	-2.44542
P59998	ARPC4	Actin-related protein 2/3 complex subunit 4	0.198838	0.414742	0.386949
P60033	CD81	CD81 antigen	0.554856	0.742311	-0.150337
P60174	TPI1	Triosephosphate isomerase	0.287267	0.515482	0.32191
P60660;P14649	MYL6	Myosin light polypeptide 6	0.721478	0.854773	0.109319
P60842	EIF4A1	Eukaryotic initiation factor 4A-I	0.0486861	0.213415	1.13367	+
P60900	PSMA6	Proteasome subunit alpha type-6	0.206355	0.426426	1.94959
P60953	CDC42	Cell division control protein 42 homolog	0.132885	0.331396	-1.24218
P60981	DSTN	Destrin	0.314237	0.536726	0.541587
P61026;P51153;Q92930;P61006;P59190	RAB10	Ras-related protein Rab-10	0.540502	0.728678	-0.645705
P61086	UBE2K	Ubiquitin-conjugating enzyme E2 K	0.444243	0.669912	-0.700004
P61158;Q9C0K3;Q9P1U1	ACTR3	Actin-related protein 3	0.753157	0.875115	-0.292605
P61160	ACTR2	Actin-related protein 2	0.142611	0.346188	1.28493
P61201	COPS2	COP9 signalosome complex subunit 2	0.52593	0.72497	0.847661
P61204;P84077;P84085	ARF3;ARF1;ARF5	ADP-ribosylation factor 3;ADP-ribosylation factor 1;ADP-ribosylation factor 5	0.297926	0.520406	0.535178
P61247	RPS3A	40S ribosomal protein S3a	0.088352	0.262975	2.09947
P61313	RPL15	60S ribosomal protein L15	0.567327	0.751018	0.472691
P61604	HSPE1	10 kDa heat shock protein, mitochondrial	0.0845325	0.259402	0.580613
P61769	B2M	Beta-2-microglobulin;Beta-2-microglobulin form pI 5.3	0.0514699	0.218129	-4.59528
P61812	TGFB2	Transforming growth factor beta-2;Latency-associated peptide	0.814004	0.903473	-0.0588233
P61916	NPC2	Epididymal secretory protein E1	0.0748806	0.242935	-1.98335
P61923	COPZ1	Coatomer subunit zeta-1	0.653237	0.80892	0.305854
P61960	UFM1	Ubiquitin-fold modifier 1	0.27568	0.505428	0.268344
P61970	NUTF2	Nuclear transport factor 2	0.430506	0.660251	-0.667467
P61978	HNRNPK	Heterogeneous nuclear ribonucleoprotein K	0.951438	0.975313	0.0316594
P61981	YWHAG	14-3-3 protein gamma;14-3-3 protein gamma, N-terminally processed	0.791502	0.894149	0.191118
P62081	RPS7	40S ribosomal protein S7	0.0756964	0.242304	1.67819
P62191	PSMC1	26S protease regulatory subunit 4	0.225253	0.456605	1.01562
P62195	PSMC5	26S protease regulatory subunit 8	0.132468	0.331635	0.51299
P62241	RPS8	40S ribosomal protein S8	0.108537	0.300669	-0.369032
P62249	RPS16	40S ribosomal protein S16	0.269722	0.500926	0.47108
P62258	YWHAE	14-3-3 protein epsilon	0.821488	0.906863	0.143833
P62266	RPS23	40S ribosomal protein S23	0.901863	0.952303	-0.150932
P62333	PSMC6	26S protease regulatory subunit 10B	0.418225	0.649578	-1.27539
P62491;Q15907	RAB11A;RAB11B	Ras-related protein Rab-11A;Ras-related protein Rab-11B	0.226108	0.458353	1.95343
P62495	ETF1	Eukaryotic peptide chain release factor subunit 1	0.135077	0.331076	1.40908
P62701	RPS4X	40S ribosomal protein S4, X isoform	0.169558	0.379464	2.28013
P62805	HIST1H4A	Histone H4	0.164416	0.374762	-2.09127
P62820;Q9H0U4;Q92928	RAB1A;RAB1B;RAB1C	Ras-related protein Rab-1A;Ras-related protein Rab-1B;Putative Ras-related protein Rab-1C	0.389649	0.616445	0.323877
P62826	RAN	GTP-binding nuclear protein Ran	0.364157	0.589591	1.60602
P62857	RPS28	40S ribosomal protein S28	0.372227	0.597985	-1.52754
P62873	GNB1	Guanine nucleotide-binding protein G(I)/G(S)/G(T) subunit beta-1	0.231819	0.463889	1.56513
P62937;P0DN26;A0A0B4J2A2;A0A075B767;A0A075B759;Q9Y536;F5H284	PPIA	Peptidyl-prolyl cis-trans isomerase A;Peptidyl-prolyl cis-trans isomerase A, N-terminally processed	0.0520758	0.222012	0.522837
P62993	GRB2	Growth factor receptor-bound protein 2	0.309638	0.529987	0.970752
P63010	AP2B1	AP-2 complex subunit beta	0.236898	0.463143	1.57143
P63104	YWHAZ	14-3-3 protein zeta/delta	0.518098	0.726141	0.281174
Q66LE6;P63151;Q00005	PPP2R2D;PPP2R2A;PPP2R2B	Serine/threonine-protein phosphatase 2A 55 kDa regulatory subunit B delta isoform;Serine/threonine-protein phosphatase 2A 55 kDa regulatory subunit B alpha isoform;Serine/threonine-protein phosphatase 2A 55 kDa regulatory subunit B beta isoform	0.869971	0.944518	0.159173
P63241;Q6IS14;Q9GZV4	EIF5A;EIF5AL1	Eukaryotic translation initiation factor 5A-1;Eukaryotic translation initiation factor 5A-1-like	0.894274	0.95035	0.0805709
P63244	GNB2L1	Guanine nucleotide-binding protein subunit beta-2-like 1;Guanine nucleotide-binding protein subunit beta-2-like 1, N-terminally processed	0.67893	0.832199	0.287589
P67775;P62714	PPP2CA;PPP2CB	Serine/threonine-protein phosphatase 2A catalytic subunit alpha isoform;Serine/threonine-protein phosphatase 2A catalytic subunit beta isoform	0.435448	0.666829	0.641565
P68032;P63267;P62736;P68133	ACTC1;ACTG2;ACTA2;ACTA1	Actin, alpha cardiac muscle 1;Actin, gamma-enteric smooth muscle;Actin, aortic smooth muscle;Actin, alpha skeletal muscle	0.431074	0.660287	0.41486
P68036;A0A1B0GUS4	UBE2L3	Ubiquitin-conjugating enzyme E2 L3	0.828229	0.910312	-0.134634
P68104;Q5VTE0;Q05639	EEF1A1;EEF1A1P5;EEF1A2	Elongation factor 1-alpha 1;Putative elongation factor 1-alpha-like 3;Elongation factor 1-alpha 2	0.260366	0.491906	0.37171
P68402	PAFAH1B2	Platelet-activating factor acetylhydrolase IB subunit beta	0.47754	0.697158	0.371847
P78371	CCT2	T-complex protein 1 subunit beta	0.446444	0.671804	0.351784
P78417	GSTO1	Glutathione S-transferase omega-1	0.2563	0.488542	1.16955
P78527	PRKDC	DNA-dependent protein kinase catalytic subunit	0.535386	0.729445	-0.225005
P78536	ADAM17	Disintegrin and metalloproteinase domain-containing protein 17	0.36831	0.593033	-0.466413
P78539	SRPX	Sushi repeat-containing protein SRPX	0.415166	0.646796	-0.215509
P78559	MAP1A	Microtubule-associated protein 1A;MAP1A heavy chain;MAP1 light chain LC2	0.294252	0.520245	0.928547
P80303	NUCB2	Nucleobindin-2;Nesfatin-1	0.0619135	0.234717	-0.91428
P80723	BASP1	Brain acid soluble protein 1	0.303373	0.522769	-0.726967
P83731	RPL24	60S ribosomal protein L24	0.651344	0.807	0.328064
P98066	TNFAIP6	Tumor necrosis factor-inducible gene 6 protein	0.170121	0.378875	1.27705
P98095	FBLN2	Fibulin-2	0.404767	0.634778	-0.379333
P98160	HSPG2	Basement membrane-specific heparan sulfate proteoglycan core protein;Endorepellin;LG3 peptide	0.473761	0.695701	-0.190123
P98179	RBM3	RNA-binding protein 3	0.0902762	0.264475	-2.41256
Q00610;P53675	CLTC	Clathrin heavy chain 1	0.17421	0.386862	0.535889
Q00688	FKBP3	Peptidyl-prolyl cis-trans isomerase FKBP3	0.398557	0.628075	1.18065
Q01082;O15020	SPTBN1	Spectrin beta chain, non-erythrocytic 1	0.272298	0.503806	0.270505
Q01105;P0DME0	SET;SETSIP	Protein SET;Protein SETSIP	0.884617	0.949285	0.0572611
Q01459	CTBS	Di-N-acetylchitobiase	0.0788982	0.247135	-0.616764
Q01469	FABP5	Fatty acid-binding protein, epidermal	0.156783	0.362037	1.9185
Q01518	CAP1	Adenylyl cyclase-associated protein 1	0.107633	0.300061	2.16413
Q01995	TAGLN	Transgelin	0.300689	0.521468	-0.360826
Q02388	COL7A1	Collagen alpha-1(VII) chain	0.478332	0.69555	-0.384254
Q02742	GCNT1	Beta-1,3-galactosyl-O-glycosyl-glycoprotein beta-1,6-N-acetylglucosaminyltransferase	0.370517	0.596062	-1.07631
Q02809	PLOD1	Procollagen-lysine,2-oxoglutarate 5-dioxygenase 1	0.0332839	0.200571	-0.503272
Q02818	NUCB1	Nucleobindin-1	0.0601203	0.234863	-0.868266
Q02952	AKAP12	A-kinase anchor protein 12	0.645078	0.802887	-0.122235
Q03167	TGFBR3	Transforming growth factor beta receptor type 3	0.0288069	0.19531	0.906641
Q04446	GBE1	1,4-alpha-glucan-branching enzyme	0.702101	0.850894	0.136288
Q04637;O43432	EIF4G1	Eukaryotic translation initiation factor 4 gamma 1	0.325326	0.547585	0.677324
Q04760	GLO1	Lactoylglutathione lyase	0.45046	0.676418	0.795975
Q04828;P52895	AKR1C1;AKR1C2	Aldo-keto reductase family 1 member C1;Aldo-keto reductase family 1 member C2	0.157449	0.363611	1.24454
Q04917	YWHAH	14-3-3 protein eta	0.42293	0.655564	-0.922566
Q05682	CALD1	Caldesmon	0.894816	0.949411	0.0439593
Q05707	COL14A1	Collagen alpha-1(XIV) chain	0.256123	0.489095	0.169675
Q06210;O94808	GFPT1	Glutamine--fructose-6-phosphate aminotransferase [isomerizing] 1	0.115563	0.302336	1.84733
Q06278	AOX1	Aldehyde oxidase	0.789641	0.896051	-0.23178
Q06323	PSME1	Proteasome activator complex subunit 1	0.957005	0.978546	0.0609824
Q06481	APLP2	Amyloid-like protein 2	0.623415	0.784223	-0.251224
Q06828	FMOD	Fibromodulin	0.0252503	0.197505	-1.78791	+
Q06830	PRDX1	Peroxiredoxin-1	0.712433	0.853889	0.0816797
Q07020	RPL18	60S ribosomal protein L18	0.411119	0.64319	-0.240266
Q07021	C1QBP	Complement component 1 Q subcomponent-binding protein, mitochondrial	0.286241	0.514586	1.53568
Q07065	CKAP4	Cytoskeleton-associated protein 4	0.468786	0.691782	0.612014
Q07092	COL16A1	Collagen alpha-1(XVI) chain	0.160562	0.366024	-1.089
Q07507	DPT	Dermatopontin	0.000977831	0.164	-3.1782	+
Q07954	LRP1	Prolow-density lipoprotein receptor-related protein 1;Low-density lipoprotein receptor-related protein 1 85 kDa subunit;Low-density lipoprotein receptor-related protein 1 515 kDa subunit;Low-density lipoprotein receptor-related protein 1 intracellular domain	0.399355	0.62753	-0.124917
Q07960	ARHGAP1	Rho GTPase-activating protein 1	0.2741	0.506341	1.34801
Q08257	CRYZ	Quinone oxidoreductase	0.127329	0.326569	-1.54616
Q08380	LGALS3BP	Galectin-3-binding protein	0.132466	0.332759	-0.457932
Q08397	LOXL1	Lysyl oxidase homolog 1	0.0154953	0.192493	-0.671218
Q08431	MFGE8	Lactadherin;Lactadherin short form;Medin	0.00443735	0.133	-0.819757
Q08629;Q9BQ16	SPOCK1	Testican-1	0.065154	0.235635	-0.91362
Q09328	MGAT5	Alpha-1,6-mannosylglycoprotein 6-beta-N-acetylglucosaminyltransferase A	0.0472905	0.211062	-1.52765	+
Q09666	AHNAK	Neuroblast differentiation-associated protein AHNAK	0.548459	0.738955	-0.340965
Q10471	GALNT2	Polypeptide N-acetylgalactosaminyltransferase 2;Polypeptide N-acetylgalactosaminyltransferase 2 soluble form	0.0173307	0.183024	-0.622134
Q10472	GALNT1	Polypeptide N-acetylgalactosaminyltransferase 1;Polypeptide N-acetylgalactosaminyltransferase 1 soluble form	0.0900805	0.265564	-0.378524
Q10567	AP1B1	AP-1 complex subunit beta-1	0.000422068	0.241	2.01351	+
Q12792	TWF1	Twinfilin-1	0.0154555	0.195167	1.7599	+
Q12797	ASPH	Aspartyl/asparaginyl beta-hydroxylase	0.296621	0.522009	-1.49664
Q12805	EFEMP1	EGF-containing fibulin-like extracellular matrix protein 1	0.00139038	0.136632	-0.89437
Q12841	FSTL1	Follistatin-related protein 1	0.00584352	0.135628	-1.05044	+
Q12884	FAP	Prolyl endopeptidase FAP;Antiplasmin-cleaving enzyme FAP, soluble form	0.28831	0.516641	-0.998927
Q12905	ILF2	Interleukin enhancer-binding factor 2	0.426001	0.657859	0.265392
Q12906	ILF3	Interleukin enhancer-binding factor 3	0.539499	0.732484	0.178838
Q12907	LMAN2	Vesicular integral-membrane protein VIP36	0.0597845	0.236154	-0.716424
Q13126	MTAP	S-methyl-5-thioadenosine phosphorylase	0.564988	0.749315	0.560056
Q13162	PRDX4	Peroxiredoxin-4	0.0502019	0.218922	-0.177981
Q13200	PSMD2	26S proteasome non-ATPase regulatory subunit 2	0.588652	0.754391	0.23619
Q13219	PAPPA	Pappalysin-1	0.274765	0.504587	-0.506239
Q13228	SELENBP1	Selenium-binding protein 1	0.929755	0.964376	0.0523853
Q13263	TRIM28	Transcription intermediary factor 1-beta	0.239725	0.466245	1.24013
Q13283	G3BP1	Ras GTPase-activating protein-binding protein 1	0.807581	0.90116	-0.242825
Q13308	PTK7	Inactive tyrosine-protein kinase 7	0.79085	0.894263	-0.067105
Q13361	MFAP5	Microfibrillar-associated protein 5	0.0505619	0.216331	-3.56865
Q13404;Q15819	UBE2V1;UBE2V2	Ubiquitin-conjugating enzyme E2 variant 1;Ubiquitin-conjugating enzyme E2 variant 2	8.75716e-05	0.116	4.34147	+
Q13443	ADAM9	Disintegrin and metalloproteinase domain-containing protein 9	0.125717	0.320618	-0.639798
Q13492;O60641	PICALM	Phosphatidylinositol-binding clathrin assembly protein	0.100744	0.287075	0.77617
Q13510	ASAH1	Acid ceramidase;Acid ceramidase subunit alpha;Acid ceramidase subunit beta	0.388322	0.615644	-0.290225
Q13557;Q13555;Q13554;Q9UQM7	CAMK2D;CAMK2G;CAMK2B	Calcium/calmodulin-dependent protein kinase type II subunit delta;Calcium/calmodulin-dependent protein kinase type II subunit gamma;Calcium/calmodulin-dependent protein kinase type II subunit beta	0.818395	0.907588	0.144801
Q13740	ALCAM	CD166 antigen	0.0543068	0.22331	-0.329886
Q13813	SPTAN1	Spectrin alpha chain, non-erythrocytic 1	0.613584	0.77901	-0.138487
Q13822	ENPP2	Ectonucleotide pyrophosphatase/phosphodiesterase family member 2	0.0418286	0.204653	-0.7904
Q13838;O00148	DDX39B;DDX39A	Spliceosome RNA helicase DDX39B;ATP-dependent RNA helicase DDX39A	0.373746	0.597892	1.37446
Q14019	COTL1	Coactosin-like protein	0.154057	0.360593	0.502775
Q14112	NID2	Nidogen-2	0.1639	0.375006	-0.318682
Q14118	DAG1	Dystroglycan;Alpha-dystroglycan;Beta-dystroglycan	0.00495524	0.137	-1.42251	+
Q14152	EIF3A	Eukaryotic translation initiation factor 3 subunit A	0.584056	0.756643	-0.43076
Q14157	UBAP2L	Ubiquitin-associated protein 2-like	0.557569	0.742939	0.785859
Q14195;Q14117	DPYSL3	Dihydropyrimidinase-related protein 3	0.0327742	0.203545	1.15914	+
Q14203	DCTN1	Dynactin subunit 1	0.38587	0.61203	0.997519
Q14204	DYNC1H1	Cytoplasmic dynein 1 heavy chain 1	0.539022	0.733503	0.647254
Q14240	EIF4A2	Eukaryotic initiation factor 4A-II;Eukaryotic initiation factor 4A-II, N-terminally processed	0.76965	0.885627	0.37298
Q14247	CTTN	Src substrate cortactin	0.551017	0.738728	0.496546
Q14315	FLNC	Filamin-C	0.154629	0.359865	0.448937
Q14393	GAS6	Growth arrest-specific protein 6	0.0283416	0.200321	-1.14933	+
Q14515	SPARCL1	SPARC-like protein 1	0.291443	0.516219	0.799538
Q14517	FAT1	Protocadherin Fat 1;Protocadherin Fat 1, nuclear form	0.588199	0.756158	0.23684
Q14697	GANAB	Neutral alpha-glucosidase AB	0.0186098	0.189885	0.848577
Q14703	MBTPS1	Membrane-bound transcription factor site-1 protease	0.0500156	0.217928	-1.21841
Q14764	MVP	Major vault protein	0.912437	0.95415	-0.0312335
Q14766	LTBP1	Latent-transforming growth factor beta-binding protein 1	0.0550454	0.226766	-2.72417
Q14767	LTBP2	Latent-transforming growth factor beta-binding protein 2	0.034232	0.198321	-1.2781	+
Q14914	PTGR1	Prostaglandin reductase 1	0.728973	0.855609	0.388035
Q14974	KPNB1	Importin subunit beta-1	0.488907	0.707402	0.385402
Q15019	2023-09-02	Septin-2	0.450342	0.677417	0.534424
Q15046	KARS	Lysine--tRNA ligase	0.138591	0.338536	0.95484
Q15063	POSTN	Periostin	0.0232457	0.202019	-0.405357
Q15084	PDIA6	Protein disulfide-isomerase A6	0.991082	0.994097	-0.00394567
Q15113	PCOLCE	Procollagen C-endopeptidase enhancer 1	0.00138927	0.144222	-1.09282	+
Q15121	PEA15	Astrocytic phosphoprotein PEA-15	0.108943	0.300818	0.828618
Q15149	PLEC	Plectin	0.745138	0.873351	0.0819416
Q15198	PDGFRL	Platelet-derived growth factor receptor-like protein	0.156767	0.363144	-1.2878
Q15238;Q00888;Q9UQ72;P11465;Q13046;P11464	PSG5;PSG4	Pregnancy-specific beta-1-glycoprotein 5;Pregnancy-specific beta-1-glycoprotein 4	0.169126	0.379871	-1.58163
Q15262	PTPRK	Receptor-type tyrosine-protein phosphatase kappa	0.426322	0.657545	0.297502
Q15293	RCN1	Reticulocalbin-1	0.499822	0.717036	-0.481263
Q15365	PCBP1	Poly(rC)-binding protein 1	0.93927	0.971209	-0.0568275
Q15366;P57721	PCBP2	Poly(rC)-binding protein 2	0.789874	0.895269	0.284898
Q15389	ANGPT1	Angiopoietin-1	0.79862	0.893825	-0.0522931
Q15393	SF3B3	Splicing factor 3B subunit 3	0.550354	0.739461	0.404239
Q15404	RSU1	Ras suppressor protein 1	0.718791	0.855866	-0.279499
Q15417	CNN3	Calponin-3	0.151964	0.360025	-2.54023
Q15435	PPP1R7	Protein phosphatase 1 regulatory subunit 7	0.51204	0.723296	0.590064
Q15436;Q15437	SEC23A	Protein transport protein Sec23A	0.341087	0.557341	0.342575
Q15582	TGFBI	Transforming growth factor-beta-induced protein ig-h3	0.0119389	0.168677	-0.814903
Q15631	TSN	Translin	0.017437	0.182313	1.71179	+
Q15782	CHI3L2	Chitinase-3-like protein 2	0.255454	0.489041	0.678663
Q15843	NEDD8	NEDD8	0.600762	0.762874	0.510427
Q15904	ATP6AP1	V-type proton ATPase subunit S1	0.191925	0.409455	-0.427825
Q15942	ZYX	Zyxin	0.315045	0.536472	-0.788431
Q16181;Q6ZU15	2023-09-07	Septin-7	0.501707	0.717026	0.345832
Q16222;Q3KQV9	UAP1	UDP-N-acetylhexosamine pyrophosphorylase;UDP-N-acetylgalactosamine pyrophosphorylase;UDP-N-acetylglucosamine pyrophosphorylase	0.332562	0.557355	0.612829
Q16270	IGFBP7	Insulin-like growth factor-binding protein 7	0.0330436	0.202839	-0.771411
Q16363	LAMA4	Laminin subunit alpha-4	0.0340684	0.199846	-0.536698
Q16394	EXT1	Exostosin-1	0.00942076	0.156727	-0.310674
Q16401	PSMD5	26S proteasome non-ATPase regulatory subunit 5	0.297121	0.521597	1.26285
Q16531	DDB1	DNA damage-binding protein 1	0.678331	0.832942	-0.543514
Q16555	DPYSL2	Dihydropyrimidinase-related protein 2	0.511129	0.722744	-0.234314
Q16610	ECM1	Extracellular matrix protein 1	0.0038981	0.137697	-1.40762	+
Q16658	FSCN1	Fascin	0.0314668	0.197475	0.680325
Q16706	MAN2A1	Alpha-mannosidase 2	0.718267	0.856413	-0.121084
Q16769	QPCT	Glutaminyl-peptide cyclotransferase	0.865489	0.941042	0.0670274
Q16851	UGP2	UTP--glucose-1-phosphate uridylyltransferase	0.844768	0.923447	0.0662454
Q16881;Q9NNW7	TXNRD1	Thioredoxin reductase 1, cytoplasmic	0.572312	0.754819	0.172162
Q27J81	INF2	Inverted formin-2	0.766372	0.884212	0.267833
Q32P28	LEPRE1	Prolyl 3-hydroxylase 1	0.182866	0.398893	-1.18874
Q4LDE5	SVEP1	Sushi, von Willebrand factor type A, EGF and pentraxin domain-containing protein 1	0.000559741	0.0989091	-1.21783	+
Q4ZHG4	FNDC1	Fibronectin type III domain-containing protein 1	0.0770619	0.240072	-0.798909
Q53RD9	FBLN7	Fibulin-7	0.132583	0.330519	-1.38613
Q5VYK3	ECM29	Proteasome-associated protein ECM29 homolog	0.616874	0.779593	0.546232
Q9Y4E1;Q641Q2	FAM21C;FAM21A	WASH complex subunit FAM21C;WASH complex subunit FAM21A	0.495739	0.715637	0.51719
Q641Q3	METRNL	Meteorin-like protein	0.49845	0.717757	-0.827556
Q66K74	MAP1S	Microtubule-associated protein 1S;MAP1S heavy chain;MAP1S light chain	0.498844	0.717228	-0.514467
Q68BL7	OLFML2A	Olfactomedin-like protein 2A	0.00616794	0.132356	0.533422
Q68BL8	OLFML2B	Olfactomedin-like protein 2B	0.751389	0.87483	-0.101294
Q6EMK4	VASN	Vasorin	0.268082	0.498645	-0.163944
Q6IBS0	TWF2	Twinfilin-2	0.668098	0.825902	-0.222831
Q6NZI2	PTRF	Polymerase I and transcript release factor	0.695538	0.846405	0.14657
Q6PCB0	VWA1	von Willebrand factor A domain-containing protein 1	0.585593	0.757012	0.213745
Q6UVK1	CSPG4	Chondroitin sulfate proteoglycan 4	0.0454321	0.210293	-0.391419
Q6UWH4	FAM198B	Protein FAM198B	0.0333905	0.200598	-1.51565	+
Q6UX71	PLXDC2	Plexin domain-containing protein 2	0.169899	0.379674	1.5652
Q6UXI7	VIT	Vitrin	0.126627	0.322244	0.660662
Q6V0I7	FAT4	Protocadherin Fat 4	0.479677	0.696482	-0.330645
Q6YHK3	CD109	CD109 antigen	0.340109	0.555528	-0.123545
Q76M96	CCDC80	Coiled-coil domain-containing protein 80	0.0602563	0.234913	-0.623454
Q7KZF4	SND1	Staphylococcal nuclease domain-containing protein 1	0.819593	0.908223	0.281626
Q7L2H7	EIF3M	Eukaryotic translation initiation factor 3 subunit M	0.71779	0.857253	-0.0926286
Q7LGC8	CHST3	Carbohydrate sulfotransferase 3	0.120062	0.308703	1.55332
Q7Z304	MAMDC2	MAM domain-containing protein 2	0.841754	0.920456	0.190892
Q7Z3B1	NEGR1	Neuronal growth regulator 1	0.152604	0.359726	-2.11472
Q7Z5L0	VMO1	Vitelline membrane outer layer protein 1 homolog	0.0865037	0.25725	-1.23559
Q7Z5L7	PODN	Podocan	0.00284748	0.137	-2.18327	+
Q7Z6Z7	HUWE1	E3 ubiquitin-protein ligase HUWE1	0.204978	0.423392	1.46195
Q7Z7G0	ABI3BP	Target of Nesh-SH3	0.00463275	0.135385	-0.543671
Q7Z7M0	MEGF8	Multiple epidermal growth factor-like domains protein 8	0.994589	0.99505	0.00742185
Q7Z7M9	GALNT5	Polypeptide N-acetylgalactosaminyltransferase 5	0.00193033	0.136348	-0.674264
Q86SR1	GALNT10	Polypeptide N-acetylgalactosaminyltransferase 10	0.029856	0.194454	-2.45989	+
Q86UD1	OAF	Out at first protein homolog	0.0502801	0.217619	-1.17494
Q86UP2	KTN1	Kinectin	0.719362	0.854679	-0.204978
Q86VP6	CAND1	Cullin-associated NEDD8-dissociated protein 1	0.0970003	0.279124	1.13357
Q86X55	CARM1	Histone-arginine methyltransferase CARM1	0.237615	0.463263	1.19966
Q86Y38	XYLT1	Xylosyltransferase 1	0.0592442	0.237489	-0.567226
Q8IUX7	AEBP1	Adipocyte enhancer-binding protein 1	0.714454	0.856717	-0.116321
Q8IV08	PLD3	Phospholipase D3	0.808614	0.901608	-0.0530713
Q8IWE2	FAM114A1	Protein NOXP20	0.465852	0.689938	-0.241254
Q8IWU6	SULF1	Extracellular sulfatase Sulf-1	0.579709	0.757857	-0.28627
Q8IWZ6	BBS7	Bardet-Biedl syndrome 7 protein	0.657971	0.814469	0.912864
Q8IX30	SCUBE3	Signal peptide, CUB and EGF-like domain-containing protein 3	0.0146469	0.191829	-2.37	+
Q8IXL6	FAM20C	Extracellular serine/threonine protein kinase FAM20C	0.915511	0.954561	0.0717538
Q8IZ83	ALDH16A1	Aldehyde dehydrogenase family 16 member A1	0.717413	0.858083	-0.316291
Q8N6G6	ADAMTSL1	ADAMTS-like protein 1	0.099188	0.283134	-0.67711
Q8N8S7	ENAH	Protein enabled homolog	0.406605	0.637523	0.29075
Q8NBJ4	GOLM1	Golgi membrane protein 1	0.0979715	0.281834	-0.854857
Q8NBP7	PCSK9	Proprotein convertase subtilisin/kexin type 9	0.0222189	0.193804	-1.13579	+
Q8NBS9	TXNDC5	Thioredoxin domain-containing protein 5	0.332939	0.556844	-0.326342
Q8NC51	SERBP1	Plasminogen activator inhibitor 1 RNA-binding protein	0.849304	0.927732	0.191608
Q8NCC3	PLA2G15	Group XV phospholipase A2	0.16749	0.379456	-1.0472
Q8NF91	SYNE1	Nesprin-1	0.150848	0.359418	1.66667
Q8NHP8	PLBD2	Putative phospholipase B-like 2;Putative phospholipase B-like 2 32 kDa form;Putative phospholipase B-like 2 45 kDa form	0.0842883	0.25885	-0.426029
Q8TB73	NDNF	Protein NDNF	0.000554469	0.120889	-2.84673	+
Q8TER0	SNED1	Sushi, nidogen and EGF-like domain-containing protein 1	0.389428	0.617467	0.338442
Q8WUA8	TSKU	Tsukushin	0.407755	0.637203	0.884296
Q8WUJ3	CEMIP	Cell migration-inducing and hyaluronan-binding protein	0.951574	0.97433	-0.0143522
Q8WUM4	PDCD6IP	Programmed cell death 6-interacting protein	0.346309	0.564239	0.35802
Q8WWI1	LMO7	LIM domain only protein 7	0.708103	0.852005	-0.351568
Q8WX93	PALLD	Palladin	0.347633	0.566833	1.12363
Q8WZ42	TTN	Titin	0.0689829	0.238537	-0.610018
Q92484	SMPDL3A	Acid sphingomyelinase-like phosphodiesterase 3a	0.00934211	0.157407	-1.01175	+
Q92520	FAM3C	Protein FAM3C	0.400833	0.628171	0.186385
Q92530	PSMF1	Proteasome inhibitor PI31 subunit	0.534666	0.72898	-0.690559
Q92598	HSPH1	Heat shock protein 105 kDa	0.519689	0.725601	-0.890409
Q92616	GCN1L1	Translational activator GCN1	0.593497	0.756313	0.310154
Q92626	PXDN	Peroxidasin homolog	0.30458	0.522883	-0.276177
Q92743	HTRA1	Serine protease HTRA1	0.0015273	0.123619	-0.789808
Q92747	ARPC1A	Actin-related protein 2/3 complex subunit 1A	0.508499	0.721416	-1.12179
Q92820	GGH	Gamma-glutamyl hydrolase	0.00457247	0.135789	-0.79486
Q92823	NRCAM	Neuronal cell adhesion molecule	0.115538	0.303443	-1.07687
Q92824	PCSK5	Proprotein convertase subtilisin/kexin type 5	0.339243	0.556827	-0.991629
Q92859	NEO1	Neogenin	0.471822	0.694082	-0.100948
Q92954	PRG4	Proteoglycan 4;Proteoglycan 4 C-terminal part	0.677922	0.833798	0.219489
Q92973;O14787	TNPO1	Transportin-1	0.180166	0.393159	0.855038
Q93063	EXT2	Exostosin-2	0.0919444	0.268637	-0.322474
Q96AC1;Q9BQL6	FERMT2	Fermitin family homolog 2	0.744642	0.873537	0.242085
Q96AY3	FKBP10	Peptidyl-prolyl cis-trans isomerase FKBP10	0.624859	0.78547	-0.161127
Q96C23	GALM	Aldose 1-epimerase	0.149437	0.358535	1.82461
Q96CG8	CTHRC1	Collagen triple helix repeat-containing protein 1	0.0221876	0.195723	-1.60916	+
Q96CX2;Q68DU8	KCTD12	BTB/POZ domain-containing protein KCTD12	0.933092	0.96438	0.0335922
Q96D15	RCN3	Reticulocalbin-3	0.0252223	0.199333	-0.505736
Q96FW1	OTUB1	Ubiquitin thioesterase OTUB1	0.297839	0.521281	1.14583
Q96G03	PGM2	Phosphoglucomutase-2	0.931697	0.964162	0.033968
Q96HC4	PDLIM5	PDZ and LIM domain protein 5	0.88991	0.948172	-0.0610905
Q96IU4	ABHD14B	Alpha/beta hydrolase domain-containing protein 14B	0.8762	0.94856	0.167063
Q96KP4	CNDP2	Cytosolic non-specific dipeptidase	0.35504	0.578283	0.404416
Q96M27	PRRC1	Protein PRRC1	0.257449	0.489858	1.5117
Q96MK3	FAM20A	Protein FAM20A	0.584877	0.756772	0.539407
Q96P44	COL21A1	Collagen alpha-1(XXI) chain	0.133743	0.331187	-4.91158
Q96P70	IPO9	Importin-9	0.264273	0.493399	0.61014
Q96QK1	VPS35	Vacuolar protein sorting-associated protein 35	0.289895	0.514711	0.70676
Q96RW7	HMCN1	Hemicentin-1	0.881974	0.950479	0.0304311
Q96TA1	FAM129B	Niban-like protein 1	0.246439	0.477356	0.457186
Q99439	CNN2	Calponin-2	0.947666	0.975986	0.0351982
Q99460	PSMD1	26S proteasome non-ATPase regulatory subunit 1	0.525907	0.727261	0.701974
Q99497	PARK7	Protein deglycase DJ-1	0.144112	0.349755	0.861787
Q99519	NEU1	Sialidase-1	0.20436	0.423273	-0.414218
Q99538	LGMN	Legumain	0.0194286	0.189911	-0.670483
Q99542	MMP19	Matrix metalloproteinase-19	0.182126	0.397586	-1.52886
Q99574	SERPINI1	Neuroserpin	0.899142	0.952218	-0.0673074
Q99715	COL12A1	Collagen alpha-1(XII) chain	0.152408	0.360025	-0.377492
Q99832	CCT7	T-complex protein 1 subunit eta	0.771876	0.885202	-0.541808
Q99983	OMD	Osteomodulin	0.0197817	0.186409	-1.14393	+
Q9BR76	CORO1B	Coronin-1B	0.235514	0.464776	0.558707
Q9BRA2	TXNDC17	Thioredoxin domain-containing protein 17	0.501017	0.717473	0.780612
Q9BRF8	CPPED1	Serine/threonine-protein phosphatase CPPED1	0.0012119	0.14575	-2.15864	+
Q9BRK3	MXRA8	Matrix-remodeling-associated protein 8	0.988926	0.993762	0.00330416
Q9BRK5	SDF4	45 kDa calcium-binding protein	0.00178403	0.132545	-0.891127
Q9BS26	ERP44	Endoplasmic reticulum resident protein 44	0.906732	0.954087	0.134992
Q9BTY2	FUCA2	Plasma alpha-L-fucosidase	0.0632941	0.23268	-0.507276
Q9BU40	CHRDL1	Chordin-like protein 1	0.134158	0.33087	-2.64064
Q9BUD6	SPON2	Spondin-2	0.53001	0.729113	0.756298
Q9BUJ0	ABHD14A	Alpha/beta hydrolase domain-containing protein 14A	0.0290881	0.193641	-2.15327	+
Q9BVA1;Q13885	TUBB2B;TUBB2A	Tubulin beta-2B chain;Tubulin beta-2A chain	0.365705	0.590498	0.850603
Q9BWS9	CHID1	Chitinase domain-containing protein 1	0.0362833	0.200948	-0.647196
Q9BY76	ANGPTL4	Angiopoietin-related protein 4	0.642715	0.801448	-0.626968
Q9GZP0	PDGFD	Platelet-derived growth factor D;Platelet-derived growth factor D, latent form;Platelet-derived growth factor D, receptor-binding form	0.0242662	0.2016	-0.60394
Q9H173	SIL1	Nucleotide exchange factor SIL1	0.350455	0.569779	0.419425
Q9H1J7	WNT5B	Protein Wnt-5b	0.110955	0.302782	-1.33386
Q9H299	SH3BGRL3	SH3 domain-binding glutamic acid-rich-like protein 3	0.654132	0.809776	-0.460244
Q9H4A4	RNPEP	Aminopeptidase B	0.426798	0.656764	1.07742
Q9H4F8	SMOC1	SPARC-related modular calcium-binding protein 1	0.00049766	0.160667	-1.25506	+
Q9H4M9;Q9NZN3	EHD1;EHD3	EH domain-containing protein 1;EH domain-containing protein 3	0.710033	0.852189	-0.376313
Q9H6B4	CLMP	CXADR-like membrane protein	0.151139	0.360025	-0.525753
Q9H8Y8	GORASP2	Golgi reassembly-stacking protein 2	0.35771	0.580729	0.292523
Q9HAT2	SIAE	Sialate O-acetylesterase	0.167798	0.379257	-0.387188
Q9HB40	SCPEP1	Retinoid-inducible serine carboxypeptidase	0.289256	0.515584	0.938651
Q9HCU0	CD248	Endosialin	0.00286848	0.132276	-1.06119	+
Q9NQC3	RTN4	Reticulon-4	0.698991	0.848038	-0.424437
Q9NQW7	XPNPEP1	Xaa-Pro aminopeptidase 1	0.750102	0.875419	-0.298724
Q9NR12	PDLIM7	PDZ and LIM domain protein 7	0.745947	0.872892	0.47329
Q9NR99	MXRA5	Matrix-remodeling-associated protein 5	0.11464	0.302794	-2.01903
Q9NRA1	PDGFC	Platelet-derived growth factor C;Platelet-derived growth factor C, latent form;Platelet-derived growth factor C, receptor-binding form	0.243433	0.472878	-0.165413
Q9NRN5	OLFML3	Olfactomedin-like protein 3	0.203426	0.42133	-0.365602
Q9NRV9	HEBP1	Heme-binding protein 1	0.102455	0.287206	1.88201
Q9NRX4	PHPT1	14 kDa phosphohistidine phosphatase	0.0719451	0.240571	0.573436
Q9NTK5	OLA1	Obg-like ATPase 1	0.549911	0.740061	-0.716377
Q9NVA2	2023-09-11	Septin-11	0.0723429	0.240607	1.06375
Q9NVD7;Q9HBI1	PARVA	Alpha-parvin	0.587956	0.756726	0.84578
Q9NY33	DPP3	Dipeptidyl peptidase 3	0.0157382	0.188907	1.21764	+
Q9NYL9	TMOD3	Tropomodulin-3	0.195925	0.412457	1.23357
Q9NYU2	UGGT1	UDP-glucose:glycoprotein glucosyltransferase 1	0.981676	0.98972	0.0316779
Q9NZ08	ERAP1	Endoplasmic reticulum aminopeptidase 1	0.957093	0.977571	0.0272879
Q9NZN4	EHD2	EH domain-containing protein 2	0.583867	0.757436	0.821
Q9NZP8	C1RL	Complement C1r subcomponent-like protein	0.117651	0.304029	-0.526988
Q9NZV1	CRIM1	Cysteine-rich motor neuron 1 protein;Processed cysteine-rich motor neuron 1 protein	0.649411	0.806076	-0.395393
Q9P2E9	RRBP1	Ribosome-binding protein 1	0.794157	0.892418	-0.154087
Q9UBG0	MRC2	C-type mannose receptor 2	0.978777	0.988908	-0.00555484
Q9UBP4	DKK3	Dickkopf-related protein 3	0.0850578	0.259576	-3.8687
Q9UBQ6	EXTL2	Exostosin-like 2;Processed exostosin-like 2	0.0244962	0.200868	-0.563188
Q9UBR2	CTSZ	Cathepsin Z	0.0373449	0.201577	-1.07863	+
Q9UBX1	CTSF	Cathepsin F	0.07893	0.246027	-0.252546
Q9UBX5	FBLN5	Fibulin-5	0.0360182	0.202448	-1.04448	+
Q9UEE5	STK17A	Serine/threonine-protein kinase 17A	0.0766672	0.241187	3.38007
Q9UHD8	2023-09-09	Septin-9	0.855888	0.932526	0.20835
Q9UHI8	ADAMTS1	A disintegrin and metalloproteinase with thrombospondin motifs 1	0.749944	0.876467	-0.0861975
Q9UHL4	DPP7	Dipeptidyl peptidase 2	0.706547	0.852738	0.0739683
Q9UHY1	NRBP1	Nuclear receptor-binding protein	0.52591	0.726114	0.645036
Q9UHY7	ENOPH1	Enolase-phosphatase E1	0.739073	0.867573	-0.3995
Q9UI42	CPA4	Carboxypeptidase A4	0.464562	0.688611	-0.598883
Q9UJ70	NAGK	N-acetyl-D-glucosamine kinase	0.906701	0.955212	-0.127852
Q9UJJ9	GNPTG	N-acetylglucosamine-1-phosphotransferase subunit gamma	0.0634523	0.232718	-0.66563
Q9UKK9	NUDT5	ADP-sugar pyrophosphatase	0.787434	0.896183	-0.0607192
Q9UKP4	ADAMTS7	A disintegrin and metalloproteinase with thrombospondin motifs 7	0.121694	0.309376	-0.512267
Q9UKU9;Q8NI99	ANGPTL2	Angiopoietin-related protein 2	0.0969623	0.28024	-0.955463
Q9UKZ9	PCOLCE2	Procollagen C-endopeptidase enhancer 2	0.946933	0.976226	-0.0210826
Q9UL46	PSME2	Proteasome activator complex subunit 2	0.525218	0.727899	-0.766048
Q9ULV4	CORO1C	Coronin-1C	0.509287	0.720895	-0.209468
Q9UM22	EPDR1	Mammalian ependymin-related protein 1	0.013913	0.194149	-0.722384
Q9UNM6	PSMD13	26S proteasome non-ATPase regulatory subunit 13	0.0490097	0.2136	2.12403	+
Q9UNN8	PROCR	Endothelial protein C receptor	0.532183	0.730226	-0.192852
Q9UNW1	MINPP1	Multiple inositol polyphosphate phosphatase 1	0.597516	0.759382	0.47075
Q9UNZ2	NSFL1C	NSFL1 cofactor p47	0.812635	0.903497	-0.205797
Q9Y240	CLEC11A	C-type lectin domain family 11 member A	0.00403689	0.137176	-0.685441
Q9Y265	RUVBL1	RuvB-like 1	0.399083	0.627933	0.556421
Q9Y281	CFL2	Cofilin-2	0.758214	0.878241	-0.156759
Q9Y287	ITM2B	Integral membrane protein 2B;BRI2, membrane form;BRI2 intracellular domain;BRI2C, soluble form;Bri23 peptide	0.959887	0.976546	-0.0830154
Q9Y2D5	AKAP2	A-kinase anchor protein 2	0.298597	0.520078	-1.15058
Q9Y2E5	MAN2B2	Epididymis-specific alpha-mannosidase	0.0850128	0.259643	-0.609475
Q9Y3F4	STRAP	Serine-threonine kinase receptor-associated protein	0.0940445	0.27566	1.50627
Q9Y490	TLN1	Talin-1	0.524965	0.729054	0.256342
Q9Y4G6	TLN2	Talin-2	0.0103408	0.157898	0.78033
Q9Y4K0	LOXL2	Lysyl oxidase homolog 2	0.0196581	0.189187	-0.86972
Q9Y4L1	HYOU1	Hypoxia up-regulated protein 1	0.400279	0.628052	-0.503625
Q9Y5Z4	HEBP2	Heme-binding protein 2	0.776739	0.888584	0.369948
Q9Y617	PSAT1	Phosphoserine aminotransferase	0.752311	0.875202	-0.199413
Q9Y625	GPC6	Glypican-6;Secreted glypican-6	0.0509181	0.216494	-0.714015
Q9Y646	CPQ	Carboxypeptidase Q	0.108085	0.299206	-0.499922
Q9Y678;Q9UBF2	COPG1	Coatomer subunit gamma-1	0.262877	0.491972	0.927421
Q9Y696;O15247;Q9NZA1;Q96NY7	CLIC4	Chloride intracellular channel protein 4	0.996148	0.995606	0.00764592
Q9Y6C2	EMILIN1	EMILIN-1	0.0199731	0.184426	-0.79587
