# Supplementary material for: Micropillar-induced changes in cell nucleus morphology enhance bone regeneration by modulating the secretome
Source: Research Square preprint supplement (doi:10.21203/rs.3.rs-5530535/v1), 2025-01-06
Supplement: Supplementary file 2 [file 72a3197ffa65f9be5f84c30d.xlsx]

## Sheet: Annotation
MyList	Gene ID	Type	Tax ID	Homologene Gene ID	Homologene Gene Tax ID	Gene Symbol	Description	Biological Process (GO)	Kinase Class (UniProt)	mmu05016 Huntington disease - Mus muscu	GO:0030198 extracellular matrix organizat	CORUM:38 20S proteasome	WP2902 p53 signaling	GO:0060485 mesenchyme development	GO:0050680 negative regulation of epithel	GO:0010812 negative regulation of cell-su	GO:0031647 regulation of protein stabilit	GO:0090288 negative regulation of cellula	GO:0070201 regulation of establishment of	GO:0018193 peptidyl-amino acid modificati	GO:0034250 positive regulation of amide m	GO:1904705 regulation of vascular associa	R-MMU-9837999 Mitochondrial protein degradat	GO:2001233 regulation of apoptotic signal	GO:0010975 regulation of neuron projectio	GO:0009110 vitamin biosynthetic process	GO:0006892 post-Golgi vesicle-mediated tr	GO:0051881 regulation of mitochondrial me	GO:1905517 macrophage migration
Lgals1	16852	symbol	M. musculus	16852	M. musculus	Lgals1	lectin, galactose binding, soluble 1	GO:0034120 positive regulation of erythrocyte aggregation;GO:0034118 regulation of erythrocyte aggregation;GO:0002317 plasma cell differentiation		0	0	0	0	0	0	1	0	0	0	0	0	0	0	0	1	0	0	0	0
Rack1	14694	symbol	M. musculus	14694	M. musculus	Rack1	receptor for activated C kinase 1	GO:0051343 positive regulation of cyclic-nucleotide phosphodiesterase activity;GO:1903750 regulation of intrinsic apoptotic signaling pathway in response to hydrogen peroxide;GO:1903751 negative regulation of intrinsic apoptotic signaling pathway in response to hydrogen peroxide		0	0	0	0	0	1	0	0	0	1	0	1	0	0	1	1	0	0	1	0
Sfrp2	20319	symbol	M. musculus	20319	M. musculus	Sfrp2	secreted frizzled-related protein 2	GO:0061185 negative regulation of dermatome development;GO:0045992 negative regulation of embryonic development;GO:0042662 negative regulation of mesodermal cell fate specification		0	1	0	0	1	1	0	0	1	0	0	0	1	0	1	1	0	0	1	0
Thbs2	21826	symbol	M. musculus	21826	M. musculus	Thbs2	thrombospondin 2	GO:0051965 positive regulation of synapse assembly;GO:0016525 negative regulation of angiogenesis;GO:2000181 negative regulation of blood vessel morphogenesis		0	0	0	1	0	0	0	0	1	0	0	0	0	0	0	0	0	0	0	0
Aebp1	11568	symbol	M. musculus	11568	M. musculus	Aebp1	AE binding protein 1	GO:1904026 regulation of collagen fibril organization;GO:1903053 regulation of extracellular matrix organization;GO:0016485 protein processing		0	0	0	0	0	0	0	0	0	0	0	0	0	0	0	0	0	0	0	0
Col5a1	12831	symbol	M. musculus	12831	M. musculus	Col5a1	collagen, type V, alpha 1	GO:0045112 integrin biosynthetic process;GO:1903225 negative regulation of endodermal cell differentiation;GO:0035989 tendon development		0	1	0	0	0	0	0	0	0	0	0	0	1	0	0	0	0	1	0	0
Mmp2	17390	symbol	M. musculus	17390	M. musculus	Mmp2	matrix metallopeptidase 2	GO:0014012 peripheral nervous system axon regeneration;GO:1903378 positive regulation of oxidative stress-induced neuron intrinsic apoptotic signaling pathway;GO:0001957 intramembranous ossification		1	1	1	1	0	0	1	0	0	0	0	0	1	0	1	0	0	0	1	1
Selenof	93684	symbol	M. musculus	93684	M. musculus	Selenof	selenoprotein F	GO:0035092 sperm DNA condensation;GO:0007289 spermatid nucleus differentiation;GO:0051084 'de novo' post-translational protein folding		0	0	0	0	0	0	0	0	0	0	0	0	0	0	0	0	0	0	0	0
Cdkn2a	12578	symbol	M. musculus	12578	M. musculus	Cdkn2a	cyclin dependent kinase inhibitor 2A	GO:1904750 negative regulation of protein localization to nucleolus;GO:0060057 apoptotic process involved in mammary gland involution;GO:2000111 positive regulation of macrophage apoptotic process		0	1	0	1	0	1	1	1	0	1	0	0	0	0	0	0	0	0	1	0
Postn	50706	symbol	M. musculus	50706	M. musculus	Postn	periostin, osteoblast specific factor	GO:0071307 cellular response to vitamin K;GO:0032571 response to vitamin K;GO:0071295 cellular response to vitamin		0	1	0	0	0	0	1	0	0	0	0	0	0	0	0	0	0	0	0	0
Vkorc1	27973	symbol	M. musculus	27973	M. musculus	Vkorc1	vitamin K epoxide reductase complex, subunit 1	GO:0042371 vitamin K biosynthetic process;GO:0017187 peptidyl-glutamic acid carboxylation;GO:0018214 protein carboxylation		0	0	0	0	0	0	0	0	0	0	1	0	0	0	0	0	1	0	0	0
Atp6v1g1	66290	symbol	M. musculus	66290	M. musculus	Atp6v1g1	ATPase, H+ transporting, lysosomal V1 subunit G1	GO:0036295 cellular response to increased oxygen levels;GO:0036296 response to increased oxygen levels;GO:0097401 synaptic vesicle lumen acidification		1	0	1	1	0	0	0	0	0	0	0	0	0	0	0	0	0	0	0	0
Grk2	110355	symbol	M. musculus	110355	M. musculus	Grk2	G protein-coupled receptor kinase 2	GO:0003108 negative regulation of the force of heart contraction by chemical signal;GO:1901081 negative regulation of relaxation of smooth muscle;GO:1901080 regulation of relaxation of smooth muscle	yes	0	0	1	0	0	1	0	0	0	0	1	0	1	0	0	0	0	0	1	0
Pkm	18746	symbol	M. musculus	18746	M. musculus	Pkm	pyruvate kinase, muscle	GO:0042866 pyruvate biosynthetic process;GO:2000767 positive regulation of cytoplasmic translation;GO:0006735 NADH regeneration	yes	1	0	0	1	0	0	0	0	1	0	0	1	0	0	0	0	0	0	0	0
Thbs1	21825	symbol	M. musculus	21825	M. musculus	Thbs1	thrombospondin 1	GO:0002581 negative regulation of antigen processing and presentation of peptide or polysaccharide antigen via MHC class II;GO:0002605 negative regulation of dendritic cell antigen processing and presentation;GO:0010751 negative regulation of nitric oxide mediated signal transduction		0	1	0	1	1	1	1	0	1	0	0	1	1	0	1	0	0	1	1	0
Mdm2	17246	symbol	M. musculus	17246	M. musculus	Mdm2	transformed mouse 3T3 cell double minute 2	GO:1990785 response to water-immersion restraint stress;GO:0007089 traversing start control point of mitotic cell cycle;GO:0072717 cellular response to actinomycin D		0	1	1	1	1	0	0	1	0	1	0	0	1	0	1	1	0	0	0	0
Gstp1	14870	symbol	M. musculus	14870	M. musculus	Gstp1	glutathione S-transferase, pi 1	GO:2000428 regulation of neutrophil aggregation;GO:2000429 negative regulation of neutrophil aggregation;GO:2000469 negative regulation of peroxidase activity		0	0	1	1	0	1	1	0	0	0	0	0	1	0	1	0	1	0	0	0
Selenow	20364	symbol	M. musculus	20364	M. musculus	Selenow	selenoprotein W	GO:0010269 response to selenium ion;GO:0010035 response to inorganic substance;GO:0042221 response to chemical		0	0	0	0	0	0	0	0	0	0	0	0	0	0	0	0	0	0	0	0
Dad1	13135	symbol	M. musculus	13135	M. musculus	Dad1	defender against cell death 1	GO:0018279 protein N-linked glycosylation via asparagine;GO:0006487 protein N-linked glycosylation;GO:0001824 blastocyst development		1	0	0	0	0	0	0	1	0	0	0	0	0	0	0	0	0	0	0	0
Plekho1	67220	symbol	M. musculus	67220	M. musculus	Plekho1	pleckstrin homology domain containing, family O member 1	GO:0072673 lamellipodium morphogenesis;GO:0051451 myoblast migration;GO:1901739 regulation of myoblast fusion		0	0	0	0	0	0	0	0	0	0	0	0	0	0	0	1	0	0	0	0
Pgam1	18648	symbol	M. musculus	18648	M. musculus	Pgam1	phosphoglycerate mutase 1	GO:0046166 glyceraldehyde-3-phosphate biosynthetic process;GO:0019682 glyceraldehyde-3-phosphate metabolic process;GO:0046184 aldehyde biosynthetic process		1	0	0	0	0	0	0	0	0	0	0	0	0	0	0	0	0	0	0	0
Snu13	20826	symbol	M. musculus	20826	M. musculus	Snu13	SNU13 homolog, small nuclear ribonucleoprotein (U4/U6.U5)	GO:0000492 box C/D snoRNP assembly;GO:0000491 small nucleolar ribonucleoprotein complex assembly;GO:0000470 maturation of LSU-rRNA		0	0	0	0	0	0	0	1	0	0	0	0	0	0	0	0	0	0	0	0
Ap3d1	11776	symbol	M. musculus	11776	M. musculus	Ap3d1	adaptor-related protein complex 3, delta 1 subunit	GO:0016182 synaptic vesicle budding from endosome;GO:0032607 interferon-alpha production;GO:0048003 antigen processing and presentation of lipid antigen via MHC class Ib		0	0	0	0	0	0	0	0	0	0	0	0	0	0	0	0	0	1	0	0
Slc25a4	11739	symbol	M. musculus	11739	M. musculus	Slc25a4	solute carrier family 25 (mitochondrial carrier, adenine nucleotide translocator), member 4	GO:0140021 mitochondrial ADP transmembrane transport;GO:1902109 negative regulation of mitochondrial membrane permeability involved in apoptotic process;GO:1990544 mitochondrial ATP transmembrane transport		1	0	1	0	0	0	0	0	0	0	0	0	0	0	1	0	0	1	0	0
Dmac1	66928	symbol	M. musculus	66928	M. musculus	Dmac1	distal membrane arm assembly complex 1	GO:0010257 NADH dehydrogenase complex assembly;GO:0032981 mitochondrial respiratory chain complex I assembly;GO:0033108 mitochondrial respiratory chain complex assembly		1	0	0	0	0	0	0	0	0	0	0	0	0	0	0	0	0	0	0	0
Megf6	230971	symbol	M. musculus	230971	M. musculus	Megf6	multiple EGF-like-domains 6	GO:0008150 biological_process		0	0	0	0	0	0	0	0	0	0	0	0	0	0	0	0	0	0	0	0
Myo1c	17913	symbol	M. musculus	17913	M. musculus	Myo1c	myosin IC	GO:1900748 positive regulation of vascular endothelial growth factor signaling pathway;GO:0030050 vesicle transport along actin filament;GO:0038089 positive regulation of cell migration by vascular endothelial growth factor signaling pathway		0	1	0	0	0	0	0	0	1	1	0	0	0	0	0	0	0	1	0	0
Atp5a1	11946	gene_synonym	M. musculus	11946	M. musculus	Atp5f1a	ATP synthase F1 subunit alpha	GO:0001937 negative regulation of endothelial cell proliferation;GO:0043536 positive regulation of blood vessel endothelial cell migration;GO:0042776 proton motive force-driven mitochondrial ATP synthesis		1	0	0	0	0	1	0	0	0	0	0	0	0	1	0	0	0	0	0	0
Rex1bd	66462	symbol	M. musculus	66462	M. musculus	Rex1bd	required for excision 1-B domain containing	GO:0008150 biological_process		0	0	0	0	0	0	0	0	0	0	0	0	0	0	0	0	0	0	0	0
Ywhag	22628	symbol	M. musculus	22628	M. musculus	Ywhag	tyrosine 3-monooxygenase/tryptophan 5-monooxygenase activation protein, gamma polypeptide	GO:1904262 negative regulation of TORC1 signaling;GO:0042149 cellular response to glucose starvation;GO:0032007 negative regulation of TOR signaling		0	0	1	1	0	0	0	0	0	0	0	0	0	0	1	0	0	1	0	0
Psmb4	19172	symbol	M. musculus	19172	M. musculus	Psmb4	proteasome (prosome, macropain) subunit, beta type 4	GO:0002862 negative regulation of inflammatory response to antigenic stimulus;GO:0002861 regulation of inflammatory response to antigenic stimulus;GO:0050728 negative regulation of inflammatory response		1	0	1	0	0	0	0	0	0	0	0	0	0	0	0	0	0	0	0	0
Atp5g3	228033	gene_synonym	M. musculus	228033	M. musculus	Atp5mc3	ATP synthase membrane subunit c locus 3	GO:0046931 pore complex assembly;GO:0015986 proton motive force-driven ATP synthesis;GO:0006754 ATP biosynthetic process		1	0	0	0	0	0	0	0	0	0	0	0	0	0	0	0	0	0	0	0
Plxnb2	140570	symbol	M. musculus	140570	M. musculus	Plxnb2	plexin B2	GO:1904861 excitatory synapse assembly;GO:0071526 semaphorin-plexin signaling pathway;GO:2001222 regulation of neuron migration		0	0	0	0	0	0	1	0	0	0	0	1	0	0	0	1	0	0	0	0
Gsto1	14873	symbol	M. musculus	14873	M. musculus	Gsto1	glutathione S-transferase omega 1	GO:0019853 L-ascorbic acid biosynthetic process;GO:1901336 lactone biosynthetic process;GO:0060316 positive regulation of ryanodine-sensitive calcium-release channel activity		1	0	0	1	0	0	0	0	0	0	0	0	0	0	0	0	1	0	0	0
Epha3	13837	symbol	M. musculus	13837	M. musculus	Epha3	Eph receptor A3	GO:0097156 fasciculation of motor neuron axon;GO:0097155 fasciculation of sensory neuron axon;GO:0071372 cellular response to follicle-stimulating hormone stimulus		0	0	0	0	1	0	1	0	0	1	1	0	1	0	0	1	0	0	0	0
Mcrip1	192173	symbol	M. musculus	192173	M. musculus	Mcrip1	MAPK regulated corepressor interacting protein 1	GO:0010717 regulation of epithelial to mesenchymal transition;GO:0045595 regulation of cell differentiation;GO:0050793 regulation of developmental process		0	0	0	0	0	0	0	0	0	0	0	0	0	0	0	0	0	0	0	0
Ftl1-ps1	634386	symbol	M. musculus	634386	M. musculus	Ftl1-ps1	ferritin light polypeptide 1, pseudogene 1			0	0	0	0	0	0	0	0	0	0	0	0	0	0	0	0	0	0	0	0
Ndufa12	66414	symbol	M. musculus	66414	M. musculus	Ndufa12	NADH:ubiquinone oxidoreductase subunit A12	GO:0042776 proton motive force-driven mitochondrial ATP synthesis;GO:0010257 NADH dehydrogenase complex assembly;GO:0032981 mitochondrial respiratory chain complex I assembly		1	0	0	0	0	0	0	0	0	0	0	0	0	0	0	0	0	0	0	0
Timp3	21859	symbol	M. musculus	21859	M. musculus	Timp3	tissue inhibitor of metalloproteinase 3	GO:1901706 mesenchymal cell differentiation involved in bone development;GO:1904684 negative regulation of metalloendopeptidase activity;GO:1905049 negative regulation of metallopeptidase activity		0	0	0	1	1	1	0	0	0	0	0	0	1	0	0	0	0	0	0	0
Asna1	56495	gene_synonym	M. musculus	56495	M. musculus	Get3	guided entry of tail-anchored proteins factor 3, ATPase	GO:0071816 tail-anchored membrane protein insertion into ER membrane;GO:0006620 post-translational protein targeting to endoplasmic reticulum membrane;GO:0045048 protein insertion into ER membrane		0	0	0	0	0	0	0	0	0	0	0	0	0	0	0	0	0	1	0	0
Pdlim5	56376	symbol	M. musculus	56376	M. musculus	Pdlim5	PDZ and LIM domain 5	GO:0003298 physiological muscle hypertrophy;GO:0003301 physiological cardiac muscle hypertrophy;GO:0061049 cell growth involved in cardiac muscle cell development		0	0	0	0	0	0	0	0	0	0	0	0	1	0	0	1	0	0	0	0
Banf1	23825	symbol	M. musculus	23825	M. musculus	Banf1	BAF nuclear assembly factor 1	GO:0075713 establishment of integrated proviral latency;GO:0019043 establishment of viral latency;GO:0010836 negative regulation of protein ADP-ribosylation		0	0	1	0	0	1	0	0	0	0	0	0	0	0	0	0	0	1	0	0
Aprt	11821	symbol	M. musculus	11821	M. musculus	Aprt	adenine phosphoribosyl transferase	GO:0006168 adenine salvage;GO:0046084 adenine biosynthetic process;GO:0043096 purine nucleobase salvage		1	0	0	0	0	0	0	0	0	0	0	0	0	0	0	0	0	0	0	0
Cavin1	19285	symbol	M. musculus	19285	M. musculus	Cavin1	caveolae associated 1	GO:0006363 termination of RNA polymerase I transcription;GO:0006361 transcription initiation at RNA polymerase I promoter;GO:0006353 DNA-templated transcription termination		0	0	0	0	0	0	0	1	0	0	0	0	0	0	0	0	0	0	0	0
Eif2s2	67204	symbol	M. musculus	67204	M. musculus	Eif2s2	eukaryotic translation initiation factor 2 subunit 2 beta	GO:0002176 male germ cell proliferation;GO:0036093 germ cell proliferation;GO:0001731 formation of translation preinitiation complex		0	0	1	0	0	0	0	1	0	0	0	0	0	0	0	0	0	0	0	0
Gpx7	67305	symbol	M. musculus	67305	M. musculus	Gpx7	glutathione peroxidase 7	GO:0006979 response to oxidative stress;GO:0006950 response to stress;GO:0050896 response to stimulus		1	0	1	0	0	0	0	0	0	0	0	0	0	0	0	0	0	0	0	0
Mtpn	14489	symbol	M. musculus	14489	M. musculus	Mtpn	myotrophin	GO:2000812 regulation of barbed-end actin filament capping;GO:0010613 positive regulation of cardiac muscle hypertrophy;GO:0014742 positive regulation of muscle hypertrophy		0	0	0	0	0	0	0	0	0	0	0	0	0	0	0	0	0	0	0	0
Uqcr10	66152	symbol	M. musculus	66152	M. musculus	Uqcr10	ubiquinol-cytochrome c reductase, complex III subunit X	GO:0006122 mitochondrial electron transport, ubiquinol to cytochrome c;GO:0019646 aerobic electron transport chain;GO:0042775 mitochondrial ATP synthesis coupled electron transport		1	0	0	0	0	0	0	0	0	0	0	0	0	0	0	0	0	0	0	0
Psmb3	26446	symbol	M. musculus	26446	M. musculus	Psmb3	proteasome (prosome, macropain) subunit, beta type 3	GO:0043161 proteasome-mediated ubiquitin-dependent protein catabolic process;GO:0010498 proteasomal protein catabolic process;GO:0006511 ubiquitin-dependent protein catabolic process		1	0	1	0	0	0	0	0	0	0	0	0	0	0	0	0	0	0	0	0
Scfd1	76983	symbol	M. musculus	76983	M. musculus	Scfd1	Sec1 family domain containing 1	GO:0060628 regulation of ER to Golgi vesicle-mediated transport;GO:1902902 negative regulation of autophagosome assembly;GO:0016242 negative regulation of macroautophagy		0	0	0	0	0	0	0	0	0	1	0	0	0	0	0	0	0	1	0	0
Hspe1	15528	symbol	M. musculus	15528	M. musculus	Hspe1	heat shock protein 1 (chaperonin 10)	GO:0051085 chaperone cofactor-dependent protein refolding;GO:0051084 'de novo' post-translational protein folding;GO:0006458 'de novo' protein folding		0	0	0	0	0	0	0	0	0	0	0	0	0	0	0	0	0	0	0	0
Lman1	70361	symbol	M. musculus	70361	M. musculus	Lman1	lectin, mannose-binding, 1	GO:0007029 endoplasmic reticulum organization;GO:0006888 endoplasmic reticulum to Golgi vesicle-mediated transport;GO:0007030 Golgi organization		0	0	0	0	0	0	0	0	0	0	0	0	0	0	0	0	0	0	0	0
Fam129b	227737	gene_synonym	M. musculus	227737	M. musculus	Niban2	niban apoptosis regulator 2	GO:0032274 gonadotropin secretion;GO:0060986 endocrine hormone secretion;GO:2000679 positive regulation of transcription regulatory region DNA binding		0	0	0	0	0	1	0	0	0	0	0	0	0	0	0	0	0	0	1	0
Gcnt1	14537	symbol	M. musculus	14537	M. musculus	Gcnt1	glucosaminyl (N-acetyl) transferase 1, core 2	GO:0016268 O-glycan processing, core 2;GO:0060352 cell adhesion molecule production;GO:0016266 O-glycan processing		1	0	0	0	0	0	0	0	0	0	0	0	0	0	0	0	0	0	0	1
Mfsd1	66868	symbol	M. musculus	66868	M. musculus	Mfsd1	major facilitator superfamily domain containing 1	GO:0061462 protein localization to lysosome;GO:0072665 protein localization to vacuole;GO:0050821 protein stabilization		0	0	0	0	0	0	0	1	0	0	0	0	0	0	0	0	0	0	0	0
Cnn3	71994	symbol	M. musculus	71994	M. musculus	Cnn3	calponin 3, acidic	GO:0031032 actomyosin structure organization;GO:0007015 actin filament organization;GO:0030036 actin cytoskeleton organization		0	1	0	0	0	0	0	0	0	0	0	0	0	0	0	0	0	0	0	0
Exoc4	20336	symbol	M. musculus	20336	M. musculus	Exoc4	exocyst complex component 4	GO:0055108 Golgi to transport vesicle transport;GO:0048341 paraxial mesoderm formation;GO:0090522 vesicle tethering involved in exocytosis		0	0	0	1	1	0	0	0	0	1	0	0	0	0	0	0	0	1	0	0
Mif	17319	symbol	M. musculus	17319	M. musculus	Mif	macrophage migration inhibitory factor (glycosylation-inhibiting factor)	GO:0061078 positive regulation of prostaglandin secretion involved in immune response;GO:0002905 regulation of mature B cell apoptotic process;GO:0002906 negative regulation of mature B cell apoptotic process		0	0	0	1	0	1	0	1	0	0	0	0	0	0	1	0	0	0	1	0
Cct5	12465	symbol	M. musculus	12465	M. musculus	Cct5	chaperonin containing TCP1 subunit 5	GO:1904851 positive regulation of establishment of protein localization to telomere;GO:0070203 regulation of establishment of protein localization to telomere;GO:0070202 regulation of establishment of protein localization to chromosome		0	0	0	0	0	0	0	1	0	1	0	0	0	0	0	0	0	0	0	0
Myo9b	17925	symbol	M. musculus	17925	M. musculus	Myo9b	myosin IXb	GO:0035385 Roundabout signaling pathway;GO:0072673 lamellipodium morphogenesis;GO:0033275 actin-myosin filament sliding		0	0	0	0	0	0	0	0	0	0	0	0	0	0	0	1	0	0	0	1
Lyz1	17110	symbol	M. musculus	17110	M. musculus	Lyz1	lysozyme 1	GO:0031640 killing of cells of another organism;GO:0141061 disruption of cell in another organism;GO:0050829 defense response to Gram-negative bacterium		0	0	0	0	0	0	0	0	0	0	0	0	0	0	0	0	0	0	0	0
Tnn	329278	symbol	M. musculus	329278	M. musculus	Tnn	tenascin N	GO:1905899 regulation of smooth muscle tissue development;GO:1903010 regulation of bone development;GO:2001223 negative regulation of neuron migration		0	1	0	1	0	1	0	0	1	0	0	0	0	0	0	1	0	0	0	0
Creb3l1	26427	symbol	M. musculus	26427	M. musculus	Creb3l1	cAMP responsive element binding protein 3-like 1	GO:0070278 extracellular matrix constituent secretion;GO:1903671 negative regulation of sprouting angiogenesis;GO:1902236 negative regulation of endoplasmic reticulum stress-induced intrinsic apoptotic signaling pathway		1	1	0	1	0	0	0	0	1	0	0	0	0	0	1	0	0	0	0	0
Slpi	20568	symbol	M. musculus	20568	M. musculus	Slpi	secretory leukocyte peptidase inhibitor	GO:0035821 modulation of process of another organism;GO:0045071 negative regulation of viral genome replication;GO:0032091 negative regulation of protein binding		0	0	0	0	0	1	0	0	0	0	0	0	0	0	0	0	0	0	1	0
Selenot	69227	symbol	M. musculus	69227	M. musculus	Selenot	selenoprotein T	GO:0060124 positive regulation of growth hormone secretion;GO:0035773 insulin secretion involved in cellular response to glucose stimulus;GO:0060123 regulation of growth hormone secretion		0	0	0	0	0	0	0	0	0	0	0	0	0	0	0	0	0	0	0	0
Arhgap29	214137	symbol	M. musculus	214137	M. musculus	Arhgap29	Rho GTPase activating protein 29	GO:0090630 activation of GTPase activity;GO:0043547 positive regulation of GTPase activity;GO:0043087 regulation of GTPase activity		0	0	0	0	0	0	0	0	0	0	0	0	0	0	0	1	0	0	0	0
Eri3	140546	symbol	M. musculus	140546	M. musculus	Eri3	exoribonuclease 3	GO:0000467 exonucleolytic trimming to generate mature 3'-end of 5.8S rRNA from tricistronic rRNA transcript (SSU-rRNA, 5.8S rRNA, LSU-rRNA);GO:0031125 rRNA 3'-end processing;GO:0000466 maturation of 5.8S rRNA from tricistronic rRNA transcript (SSU-rRNA, 5.8S rRNA, LSU-rRNA)		0	0	0	0	0	0	0	1	0	0	0	0	0	0	0	0	0	0	0	0
1500011B03Rik	66236	symbol	M. musculus	66236	M. musculus	1500011B03Rik	RIKEN cDNA 1500011B03 gene	GO:0008150 biological_process		0	0	0	0	0	0	0	0	0	0	0	0	0	0	0	0	0	0	0	0
Timm50	66525	symbol	M. musculus	66525	M. musculus	Timm50	translocase of inner mitochondrial membrane 50	GO:0030150 protein import into mitochondrial matrix;GO:0001836 release of cytochrome c from mitochondria;GO:0044743 protein transmembrane import into intracellular organelle		0	0	0	0	0	0	0	0	0	0	0	0	0	0	0	0	0	1	0	0
Pigs	276846	symbol	M. musculus	276846	M. musculus	Pigs	phosphatidylinositol glycan anchor biosynthesis, class S	GO:0016255 attachment of GPI anchor to protein;GO:0006506 GPI anchor biosynthetic process;GO:0006505 GPI anchor metabolic process		1	0	0	0	0	0	0	0	0	0	0	0	0	0	0	0	0	0	0	0
Aamp	227290	symbol	M. musculus	227290	M. musculus	Aamp	angio-associated migratory protein			0	0	0	0	0	0	0	0	0	0	0	0	0	0	0	0	0	0	0	0
Rbfox2	93686	symbol	M. musculus	93686	M. musculus	Rbfox2	RNA binding protein, fox-1 homolog (C. elegans) 2	GO:1902631 negative regulation of membrane hyperpolarization;GO:0010724 regulation of definitive erythrocyte differentiation;GO:0110104 mRNA alternative polyadenylation		0	0	0	0	0	0	0	0	0	0	0	0	0	0	0	0	0	0	1	0
Ndufa2	17991	symbol	M. musculus	17991	M. musculus	Ndufa2	NADH:ubiquinone oxidoreductase subunit A2	GO:0001835 blastocyst hatching;GO:0035188 hatching;GO:0071684 organism emergence from protective structure		1	0	0	0	0	0	0	0	0	0	0	0	0	1	0	0	0	0	0	0
Npm1	18148	symbol	M. musculus	18148	M. musculus	Npm1	nucleophosmin 1	GO:0060735 regulation of eIF2 alpha phosphorylation by dsRNA;GO:1902629 regulation of mRNA stability involved in cellular response to UV;GO:0000448 cleavage in ITS2 between 5.8S rRNA and LSU-rRNA of tricistronic rRNA transcript (SSU-rRNA, 5.8S rRNA, LSU-rRNA)		0	0	1	1	0	1	0	1	0	1	0	1	0	0	0	0	0	0	0	0
Alas1	11655	symbol	M. musculus	11655	M. musculus	Alas1	aminolevulinic acid synthase 1	GO:1903412 response to bile acid;GO:0006785 heme B biosynthetic process;GO:0046492 heme B metabolic process		0	0	0	0	0	0	0	0	0	0	0	0	0	1	0	0	0	0	0	0
Psmb2	26445	symbol	M. musculus	26445	M. musculus	Psmb2	proteasome (prosome, macropain) subunit, beta type 2	GO:0043161 proteasome-mediated ubiquitin-dependent protein catabolic process;GO:0010498 proteasomal protein catabolic process;GO:0006511 ubiquitin-dependent protein catabolic process		1	0	1	0	0	0	0	0	0	0	0	0	0	0	0	0	0	0	0	0
Pebp1	23980	symbol	M. musculus	23980	M. musculus	Pebp1	phosphatidylethanolamine binding protein 1	GO:0060409 positive regulation of acetylcholine metabolic process;GO:1905921 regulation of acetylcholine biosynthetic process;GO:1905923 positive regulation of acetylcholine biosynthetic process		0	0	1	1	0	1	0	0	0	0	0	0	0	0	1	0	0	0	0	0
Ndufab1	70316	symbol	M. musculus	70316	M. musculus	Ndufab1	NADH:ubiquinone oxidoreductase subunit AB1	GO:0009249 protein lipoylation;GO:0044571 [2Fe-2S] cluster assembly;GO:0016226 iron-sulfur cluster assembly		1	0	0	0	0	0	0	0	0	0	1	0	0	0	0	0	0	0	0	0
Ndufa11	69875	symbol	M. musculus	69875	M. musculus	Ndufa11	NADH:ubiquinone oxidoreductase subunit A11	GO:0042776 proton motive force-driven mitochondrial ATP synthesis;GO:0010257 NADH dehydrogenase complex assembly;GO:0032981 mitochondrial respiratory chain complex I assembly		1	0	0	0	0	0	0	0	0	0	0	0	0	0	0	0	0	0	0	0
Vti1a	53611	symbol	M. musculus	53611	M. musculus	Vti1a	vesicle transport through interaction with t-SNAREs 1A	GO:0016189 synaptic vesicle to endosome fusion;GO:0050882 voluntary musculoskeletal movement;GO:0048280 vesicle fusion with Golgi apparatus		0	0	0	0	0	0	0	0	0	0	0	0	0	0	0	0	0	1	0	0
B4galt1	14595	symbol	M. musculus	14595	M. musculus	B4galt1	UDP-Gal:betaGlcNAc beta 1,4- galactosyltransferase, polypeptide 1	GO:0061755 positive regulation of circulating fibrinogen levels;GO:0005989 lactose biosynthetic process;GO:0044537 regulation of circulating fibrinogen levels		1	1	0	0	0	1	0	0	0	0	0	0	0	0	0	0	0	0	0	1
Mindy3	66960	symbol	M. musculus	66960	M. musculus	Mindy3	MINDY lysine 48 deubiquitinase 3	GO:0071108 protein K48-linked deubiquitination;GO:0016579 protein deubiquitination;GO:0070646 protein modification by small protein removal		0	0	0	0	0	0	0	0	0	0	0	0	0	0	0	0	0	0	0	0
Rab21	216344	symbol	M. musculus	216344	M. musculus	Rab21	RAB21, member RAS oncogene family	GO:2000643 positive regulation of early endosome to late endosome transport;GO:0032482 Rab protein signal transduction;GO:2000641 regulation of early endosome to late endosome transport		0	0	0	0	0	0	0	1	0	1	0	0	0	0	0	1	0	0	0	0
Jpt1	15374	symbol	M. musculus	15374	M. musculus	Jpt1	Jupiter microtubule associated homolog 1	GO:0008150 biological_process		0	0	0	0	0	0	0	0	0	0	0	0	0	0	0	0	0	0	0	0
Dcxr	67880	symbol	M. musculus	67880	M. musculus	Dcxr	dicarbonyl L-xylulose reductase	GO:0005997 xylulose metabolic process;GO:0042732 D-xylose metabolic process;GO:0006064 glucuronate catabolic process		1	0	0	0	0	0	0	0	0	0	0	0	0	0	0	0	0	0	0	0
Lox	16948	symbol	M. musculus	16948	M. musculus	Lox	lysyl oxidase	GO:0035906 descending aorta development;GO:0018057 peptidyl-lysine oxidation;GO:0035905 ascending aorta development		0	1	0	0	0	0	0	0	1	0	1	0	1	0	1	0	0	0	1	0
Mical2	320878	symbol	M. musculus	320878	M. musculus	Mical2	microtubule associated monooxygenase, calponin and LIM domain containing 2	GO:0019417 sulfur oxidation;GO:0030042 actin filament depolymerization;GO:0051261 protein depolymerization		0	1	0	0	0	0	0	0	0	0	0	0	0	0	0	0	1	0	0	0
Vps28	66914	symbol	M. musculus	66914	M. musculus	Vps28	vacuolar protein sorting 28	GO:2000395 regulation of ubiquitin-dependent endocytosis;GO:2000397 positive regulation of ubiquitin-dependent endocytosis;GO:0043328 protein transport to vacuole involved in ubiquitin-dependent protein catabolic process via the multivesicular body sorting pathway		0	0	1	0	0	1	0	0	0	1	0	0	0	0	0	0	0	0	0	0
Gpc1	14733	symbol	M. musculus	14733	M. musculus	Gpc1	glypican 1	GO:2001016 positive regulation of skeletal muscle cell differentiation;GO:0030200 heparan sulfate proteoglycan catabolic process;GO:0030167 proteoglycan catabolic process		0	0	1	1	0	0	0	0	1	0	0	0	0	0	0	0	1	0	0	0
Phlda3	27280	symbol	M. musculus	27280	M. musculus	Phlda3	pleckstrin homology like domain, family A, member 3	GO:0042771 intrinsic apoptotic signaling pathway in response to DNA damage by p53 class mediator;GO:0051898 negative regulation of phosphatidylinositol 3-kinase/protein kinase B signal transduction;GO:0072332 intrinsic apoptotic signaling pathway by p53 class mediator		0	0	0	1	0	0	0	0	0	0	0	0	0	0	1	0	0	0	0	0
Serf2	378702	symbol	M. musculus	378702	M. musculus	Serf2	small EDRK-rich factor 2	GO:0031648 protein destabilization;GO:0031647 regulation of protein stability;GO:0065008 regulation of biological quality		0	0	0	0	0	0	0	1	0	0	0	0	0	0	0	0	0	0	0	0
Tpst2	22022	symbol	M. musculus	22022	M. musculus	Tpst2	protein-tyrosine sulfotransferase 2	GO:0006478 peptidyl-tyrosine sulfation;GO:0006477 protein sulfation;GO:0060467 negative regulation of fertilization		0	0	0	0	0	0	0	0	0	0	1	0	0	0	0	0	1	1	0	0
Loxl3	16950	symbol	M. musculus	16950	M. musculus	Loxl3	lysyl oxidase-like 3	GO:1905590 fibronectin fibril organization;GO:2000329 negative regulation of T-helper 17 cell lineage commitment;GO:0018057 peptidyl-lysine oxidation		0	1	0	0	1	0	1	0	0	0	1	0	0	0	0	0	0	0	0	0
Gga2	74105	symbol	M. musculus	74105	M. musculus	Gga2	golgi associated, gamma adaptin ear containing, ARF binding protein 2	GO:0043001 Golgi to plasma membrane protein transport;GO:0034394 protein localization to cell surface;GO:0006893 Golgi to plasma membrane transport		0	0	0	0	0	0	0	0	0	0	0	0	0	0	0	0	0	1	0	0
Hk1	15275	symbol	M. musculus	15275	M. musculus	Hk1	hexokinase 1	GO:0072656 maintenance of protein location in mitochondrion;GO:0006013 mannose metabolic process;GO:0006002 fructose 6-phosphate metabolic process	yes	1	0	0	0	0	0	0	0	0	0	0	0	0	0	0	0	0	0	0	0
Tnks	21951	symbol	M. musculus	21951	M. musculus	Tnks	tankyrase, TRF1-interacting ankyrin-related ADP-ribose polymerase	GO:1904743 negative regulation of telomeric DNA binding;GO:1904907 regulation of maintenance of mitotic sister chromatid cohesion, telomeric;GO:1904908 negative regulation of maintenance of mitotic sister chromatid cohesion, telomeric		0	0	1	1	0	1	0	0	0	0	1	0	0	0	0	0	0	0	1	0
Samd1	666704	symbol	M. musculus	666704	M. musculus	Samd1	sterile alpha motif domain containing 1	GO:0034439 lipoprotein lipid oxidation;GO:0042160 lipoprotein modification;GO:0042161 lipoprotein oxidation		0	0	0	0	0	0	0	0	0	0	0	0	0	0	0	0	0	0	0	0
Vcl	22330	symbol	M. musculus	22330	M. musculus	Vcl	vinculin	GO:1904702 regulation of protein localization to adherens junction;GO:0150106 regulation of protein localization to cell-cell junction;GO:0034333 adherens junction assembly		0	0	1	0	0	0	1	0	0	0	0	0	0	0	0	0	0	0	1	0
Ccng1	12450	symbol	M. musculus	12450	M. musculus	Ccng1	cyclin G1	GO:0007095 mitotic G2 DNA damage checkpoint signaling;GO:0006949 syncytium formation;GO:0044818 mitotic G2/M transition checkpoint		0	0	0	1	0	1	0	0	0	0	0	0	0	0	0	0	0	0	0	0
Med11	66172	symbol	M. musculus	66172	M. musculus	Med11	mediator complex subunit 11	GO:0051123 RNA polymerase II preinitiation complex assembly;GO:0032968 positive regulation of transcription elongation by RNA polymerase II;GO:0070897 transcription preinitiation complex assembly		0	0	0	0	0	0	0	0	0	0	0	0	0	0	0	0	0	0	0	0
Nsa2	59050	symbol	M. musculus	59050	M. musculus	Nsa2	NSA2 ribosome biogenesis homolog	GO:0000470 maturation of LSU-rRNA;GO:0000460 maturation of 5.8S rRNA;GO:0042273 ribosomal large subunit biogenesis		0	0	0	0	0	0	0	1	0	0	0	0	0	0	0	0	0	0	0	0
Col8a1	12837	symbol	M. musculus	12837	M. musculus	Col8a1	collagen, type VIII, alpha 1	GO:0001935 endothelial cell proliferation;GO:0010811 positive regulation of cell-substrate adhesion;GO:0048593 camera-type eye morphogenesis		0	1	0	0	0	0	1	0	0	0	0	0	0	0	0	0	0	0	0	0
Tubb6	67951	symbol	M. musculus	67951	M. musculus	Tubb6	tubulin, beta 6 class V	GO:0000226 microtubule cytoskeleton organization;GO:0000278 mitotic cell cycle;GO:0007017 microtubule-based process		1	0	1	0	0	0	0	0	0	0	0	0	0	0	0	0	0	0	0	0
Rcc2	108911	symbol	M. musculus	108911	M. musculus	Rcc2	regulator of chromosome condensation 2	GO:0072356 chromosome passenger complex localization to kinetochore;GO:0051987 positive regulation of attachment of spindle microtubules to kinetochore;GO:0034501 protein localization to kinetochore		0	0	1	1	0	1	1	0	0	0	0	0	0	0	0	1	0	0	0	0
Hnrnpu	51810	symbol	M. musculus	51810	M. musculus	Hnrnpu	heterogeneous nuclear ribonucleoprotein U	GO:1990280 RNA localization to chromatin;GO:1902889 protein localization to spindle microtubule;GO:0098961 dendritic transport of ribonucleoprotein complex		0	0	0	1	0	1	0	0	0	0	0	1	1	0	0	0	0	0	0	0
Atp6v0d1	11972	symbol	M. musculus	11972	M. musculus	Atp6v0d1	ATPase, H+ transporting, lysosomal V0 subunit D1	GO:0036295 cellular response to increased oxygen levels;GO:0036296 response to increased oxygen levels;GO:0097401 synaptic vesicle lumen acidification		1	0	1	1	0	0	0	0	0	0	0	0	0	0	0	0	0	0	0	0
Cul7	66515	symbol	M. musculus	66515	M. musculus	Cul7	cullin 7	GO:0045601 regulation of endothelial cell differentiation;GO:0050775 positive regulation of dendrite morphogenesis;GO:0010770 positive regulation of cell morphogenesis		0	0	1	1	1	0	0	0	0	0	0	0	0	0	0	1	0	0	0	0
Snrpg	68011	symbol	M. musculus	68011	M. musculus	Snrpg	small nuclear ribonucleoprotein polypeptide G	GO:0000387 spliceosomal snRNP assembly;GO:0022618 protein-RNA complex assembly;GO:0071826 protein-RNA complex organization		0	0	0	0	0	0	0	1	0	0	0	0	0	0	0	0	0	0	0	0
Wls	68151	symbol	M. musculus	68151	M. musculus	Wls	wntless WNT ligand secretion mediator	GO:0061355 Wnt protein secretion;GO:0061357 positive regulation of Wnt protein secretion;GO:0061356 regulation of Wnt protein secretion		0	0	1	0	0	0	0	0	0	1	0	0	0	0	0	1	0	0	0	0
Atpif1	11983	gene_synonym	M. musculus	11983	M. musculus	Atp5if1	ATP synthase inhibitory factor subunit 1	GO:0051882 mitochondrial depolarization;GO:1901030 positive regulation of mitochondrial outer membrane permeabilization involved in apoptotic signaling pathway;GO:1904925 positive regulation of autophagy of mitochondrion in response to mitochondrial depolarization		1	0	0	0	0	1	0	0	0	1	0	0	0	1	0	0	0	1	1	0
Fbxo6	50762	symbol	M. musculus	50762	M. musculus	Fbxo6	F-box protein 6	GO:0006516 glycoprotein catabolic process;GO:0031146 SCF-dependent proteasomal ubiquitin-dependent protein catabolic process;GO:0036503 ERAD pathway		0	0	1	1	0	0	0	0	1	0	0	0	0	0	0	0	0	0	0	0
Trim28	21849	symbol	M. musculus	21849	M. musculus	Trim28	tripartite motif-containing 28	GO:1901536 negative regulation of DNA demethylation;GO:0060028 convergent extension involved in axis elongation;GO:0090309 positive regulation of DNA methylation-dependent heterochromatin formation		0	0	0	1	1	0	0	0	0	1	1	0	0	0	0	0	0	0	1	0
Crtap	56693	symbol	M. musculus	56693	M. musculus	Crtap	cartilage associated protein	GO:0018400 peptidyl-proline hydroxylation to 3-hydroxy-L-proline;GO:0019511 peptidyl-proline hydroxylation;GO:0018126 protein hydroxylation		0	1	0	0	0	1	0	1	0	0	1	0	0	0	0	0	0	0	0	0
Nudt3	56409	symbol	M. musculus	56409	M. musculus	Nudt3	nudix hydrolase 3	GO:0071544 diphosphoinositol polyphosphate catabolic process;GO:0071543 diphosphoinositol polyphosphate metabolic process;GO:0071545 inositol phosphate catabolic process		1	0	0	0	0	0	0	0	0	0	0	0	0	0	0	0	0	0	0	0
Ntmt1	66617	symbol	M. musculus	66617	M. musculus	Ntmt1	N-terminal Xaa-Pro-Lys N-methyltransferase 1	GO:0018011 N-terminal peptidyl-alanine methylation;GO:0018194 peptidyl-alanine modification;GO:0018012 N-terminal peptidyl-alanine trimethylation		0	0	0	0	0	0	0	0	0	0	1	0	0	0	0	0	0	0	0	0
Ccnd1	12443	symbol	M. musculus	12443	M. musculus	Ccnd1	cyclin D1	GO:0000320 re-entry into mitotic cell cycle;GO:0033601 positive regulation of mammary gland epithelial cell proliferation;GO:0033327 Leydig cell differentiation		0	0	1	1	0	1	0	0	1	0	0	0	0	0	0	0	0	0	0	0
Hpf1	72612	symbol	M. musculus	72612	M. musculus	Hpf1	histone PARylation factor 1	GO:0010835 regulation of protein ADP-ribosylation;GO:0140861 DNA repair-dependent chromatin remodeling;GO:0006302 double-strand break repair		0	0	0	1	0	1	0	0	0	0	0	0	0	0	0	0	0	0	0	0
Kremen1	84035	symbol	M. musculus	84035	M. musculus	Kremen1	kringle containing transmembrane protein 1	GO:0048681 negative regulation of axon regeneration;GO:0070571 negative regulation of neuron projection regeneration;GO:0048679 regulation of axon regeneration		0	0	1	0	0	0	0	0	0	0	0	0	0	0	0	1	0	0	0	0
Adamts12	239337	symbol	M. musculus	239337	M. musculus	Adamts12	ADAM metallopeptidase with thrombospondin type 1 motif 12	GO:1902203 negative regulation of hepatocyte growth factor receptor signaling pathway;GO:2001112 regulation of cellular response to hepatocyte growth factor stimulus;GO:2001113 negative regulation of cellular response to hepatocyte growth factor stimulus		0	1	1	0	0	0	0	0	1	0	0	0	0	0	0	0	0	0	0	0
Pcnx3	104401	symbol	M. musculus	104401	M. musculus	Pcnx3	pecanex homolog 3	GO:0008150 biological_process		0	0	0	0	0	0	0	0	0	0	0	0	0	0	0	0	0	0	0	0
Csrp1	13007	symbol	M. musculus	13007	M. musculus	Csrp1	cysteine and glycine-rich protein 1	GO:0045214 sarcomere organization;GO:0030239 myofibril assembly;GO:0055002 striated muscle cell development		0	1	0	0	0	0	0	0	0	0	0	0	0	0	0	0	0	0	0	0
Qsox1	104009	symbol	M. musculus	104009	M. musculus	Qsox1	quiescin Q6 sulfhydryl oxidase 1	GO:0016242 negative regulation of macroautophagy;GO:0085029 extracellular matrix assembly;GO:0010507 negative regulation of autophagy		0	1	0	0	0	0	0	0	0	0	0	0	0	0	0	0	0	0	0	0
Slc19a2	116914	symbol	M. musculus	116914	M. musculus	Slc19a2	solute carrier family 19 (thiamine transporter), member 2	GO:0031919 vitamin B6 transport;GO:0031923 pyridoxine transport;GO:0009229 thiamine diphosphate biosynthetic process		1	0	0	0	0	0	0	0	0	0	0	0	0	0	0	0	1	0	0	0
Ephx1	13849	symbol	M. musculus	13849	M. musculus	Ephx1	epoxide hydrolase 1, microsomal	GO:0097176 epoxide metabolic process;GO:0034312 diol biosynthetic process;GO:0018904 ether metabolic process		1	0	0	0	0	0	0	0	0	0	0	0	0	0	0	0	0	0	0	0
Paxx	227622	symbol	M. musculus	227622	M. musculus	Paxx	non-homologous end joining factor	GO:0006303 double-strand break repair via nonhomologous end joining;GO:0006302 double-strand break repair;GO:0006281 DNA repair		0	0	0	1	0	0	0	0	0	0	0	0	0	0	0	0	0	0	0	0
Pmpca	66865	symbol	M. musculus	66865	M. musculus	Pmpca	peptidase (mitochondrial processing) alpha	GO:0006627 protein processing involved in protein targeting to mitochondrion;GO:0034982 mitochondrial protein processing;GO:0006626 protein targeting to mitochondrion		0	0	0	0	0	0	0	0	0	0	0	0	0	1	0	0	0	1	0	0
Dab2ip	69601	symbol	M. musculus	69601	M. musculus	Dab2ip	disabled 2 interacting protein	GO:0070317 negative regulation of G0 to G1 transition;GO:0021814 cell motility involved in cerebral cortex radial glia guided migration;GO:0036324 vascular endothelial growth factor receptor-2 signaling pathway		0	0	1	1	0	1	0	0	1	0	0	0	0	0	1	1	0	0	1	0
Rem1	19700	symbol	M. musculus	19700	M. musculus	Rem1	rad and gem related GTP binding protein 1	GO:0014722 regulation of skeletal muscle contraction by calcium ion signaling;GO:1904878 negative regulation of calcium ion transmembrane transport via high voltage-gated calcium channel;GO:1901842 negative regulation of high voltage-gated calcium channel activity		0	0	0	0	0	0	0	0	0	0	0	0	0	0	0	0	0	0	0	0
Pgrmc2	70804	symbol	M. musculus	70804	M. musculus	Pgrmc2	progesterone receptor membrane component 2	GO:0015886 heme transport;GO:1901678 iron coordination entity transport;GO:0006826 iron ion transport		0	1	1	0	0	0	0	0	0	0	0	0	0	0	0	0	0	0	0	0
Penk	18619	symbol	M. musculus	18619	M. musculus	Penk	preproenkephalin	GO:0038003 G protein-coupled opioid receptor signaling pathway;GO:0099538 synaptic signaling via neuropeptide;GO:2000987 positive regulation of behavioral fear response		0	0	0	0	0	0	0	0	0	0	0	0	0	0	0	0	0	0	0	0
Ube2j1	56228	symbol	M. musculus	56228	M. musculus	Ube2j1	ubiquitin-conjugating enzyme E2J 1	GO:1904153 negative regulation of retrograde protein transport, ER to cytosol;GO:0070862 negative regulation of protein exit from endoplasmic reticulum;GO:1904152 regulation of retrograde protein transport, ER to cytosol		1	0	1	0	0	0	0	0	1	1	0	0	0	0	0	0	0	0	0	0
Noc4l	100608	symbol	M. musculus	100608	M. musculus	Noc4l	NOC4 like	GO:0042254 ribosome biogenesis;GO:0022613 ribonucleoprotein complex biogenesis;GO:0044085 cellular component biogenesis		0	0	0	0	0	0	0	1	0	0	0	0	0	0	0	0	0	0	0	0
Grcc10	14790	symbol	M. musculus	14790	M. musculus	Grcc10	gene rich cluster, C10 gene	GO:0021678 third ventricle development;GO:0036343 psychomotor behavior;GO:0021540 corpus callosum morphogenesis		0	0	0	0	0	0	0	0	0	0	0	0	0	0	0	0	0	0	0	0
Atn1	13498	symbol	M. musculus	13498	M. musculus	Atn1	atrophin 1	GO:0030011 maintenance of cell polarity;GO:0032094 response to food;GO:0008340 determination of adult lifespan		0	0	0	0	0	0	0	0	0	0	0	0	0	0	0	0	0	0	0	0
Cpt1c	78070	symbol	M. musculus	78070	M. musculus	Cpt1c	carnitine palmitoyltransferase 1c	GO:0009437 carnitine metabolic process;GO:0006577 amino-acid betaine metabolic process;GO:0099072 regulation of postsynaptic membrane neurotransmitter receptor levels		1	0	0	0	0	0	0	0	0	0	0	0	0	0	0	0	0	0	0	0
Bax	12028	symbol	M. musculus	12028	M. musculus	Bax	BCL2-associated X protein	GO:0032976 release of matrix enzymes from mitochondria;GO:0001777 T cell homeostatic proliferation;GO:0002352 B cell negative selection		1	1	0	1	0	1	0	0	1	0	1	0	0	1	1	0	0	1	1	0
Lsm7	66094	symbol	M. musculus	66094	M. musculus	Lsm7	LSM7 homolog, U6 small nuclear RNA and mRNA degradation associated	GO:0000956 nuclear-transcribed mRNA catabolic process;GO:0006402 mRNA catabolic process;GO:0006401 RNA catabolic process		0	0	0	0	0	0	0	0	0	0	0	0	0	0	0	0	0	0	0	0
Ctxn1	330695	symbol	M. musculus	330695	M. musculus	Ctxn1	cortexin 1	GO:0008150 biological_process		0	0	0	0	0	0	0	0	0	0	0	0	0	0	0	0	0	0	0	0
Psmb5	19173	symbol	M. musculus	19173	M. musculus	Psmb5	proteasome (prosome, macropain) subunit, beta type 5	GO:0043161 proteasome-mediated ubiquitin-dependent protein catabolic process;GO:0006979 response to oxidative stress;GO:0010498 proteasomal protein catabolic process		1	0	1	0	0	0	0	0	0	0	0	0	0	0	0	0	0	0	0	0
Wdr61	66317	gene_synonym	M. musculus	66317	M. musculus	Skic8	SKI8 subunit of superkiller complex	GO:0070478 nuclear-transcribed mRNA catabolic process, 3'-5' exonucleolytic nonsense-mediated decay;GO:0034427 nuclear-transcribed mRNA catabolic process, exonucleolytic, 3'-5';GO:0000291 nuclear-transcribed mRNA catabolic process, exonucleolytic		0	0	0	0	0	0	0	0	0	0	0	0	0	0	0	0	0	0	0	0
Trpv2	22368	symbol	M. musculus	22368	M. musculus	Trpv2	transient receptor potential cation channel, subfamily V, member 2	GO:0098703 calcium ion import across plasma membrane;GO:1902656 calcium ion import into cytosol;GO:0090280 positive regulation of calcium ion import		0	0	0	0	0	1	0	0	0	0	0	0	0	0	0	1	0	0	0	0
Naa38	78304	symbol	M. musculus	78304	M. musculus	Naa38	N(alpha)-acetyltransferase 38, NatC auxiliary subunit	GO:0043066 negative regulation of apoptotic process;GO:0043069 negative regulation of programmed cell death;GO:0042981 regulation of apoptotic process		0	0	0	0	0	0	0	0	0	0	0	0	0	0	0	0	0	0	0	0
Acadvl	11370	symbol	M. musculus	11370	M. musculus	Acadvl	acyl-Coenzyme A dehydrogenase, very long chain	GO:0033539 fatty acid beta-oxidation using acyl-CoA dehydrogenase;GO:0046322 negative regulation of fatty acid oxidation;GO:0045717 negative regulation of fatty acid biosynthetic process		0	0	0	0	0	0	0	0	0	0	0	0	0	0	0	0	0	0	0	0
Dynll2	68097	symbol	M. musculus	68097	M. musculus	Dynll2	dynein light chain LC8-type 2	GO:0007017 microtubule-based process;GO:0009987 cellular process;GO:0008150 biological_process		0	0	1	0	0	0	0	0	0	0	0	0	0	0	0	0	0	0	0	0
Lrrc59	98238	symbol	M. musculus	98238	M. musculus	Lrrc59	leucine rich repeat containing 59			0	0	0	0	0	0	0	0	0	0	0	0	0	0	0	0	0	0	0	0
Ddx41	72935	symbol	M. musculus	72935	M. musculus	Ddx41	DEAD box helicase 41	GO:0035458 cellular response to interferon-beta;GO:0035456 response to interferon-beta;GO:0000375 RNA splicing, via transesterification reactions		0	0	0	0	0	0	0	0	0	0	0	0	0	0	0	0	0	0	0	0
Nek9	217718	symbol	M. musculus	217718	M. musculus	Nek9	NIMA (never in mitosis gene a)-related expressed kinase 9	GO:0051301 cell division;GO:0007346 regulation of mitotic cell cycle;GO:0000278 mitotic cell cycle	yes	0	0	1	1	0	0	0	0	0	0	0	0	0	0	0	0	0	0	0	0
Ighm	16019	symbol	M. musculus	16019	M. musculus	Ighm	immunoglobulin heavy constant mu	GO:0002331 pre-B cell allelic exclusion;GO:0002343 peripheral B cell selection;GO:0002344 B cell affinity maturation		0	0	0	0	0	0	0	0	0	0	1	0	0	0	0	1	0	0	0	0
Eif3e	16341	symbol	M. musculus	16341	M. musculus	Eif3e	eukaryotic translation initiation factor 3, subunit E	GO:1902415 regulation of mRNA binding;GO:1902416 positive regulation of mRNA binding;GO:1905216 positive regulation of RNA binding		0	0	0	0	0	0	0	0	0	1	0	1	0	0	0	0	0	0	1	0
Ext1	14042	symbol	M. musculus	14042	M. musculus	Ext1	exostosin glycosyltransferase 1	GO:0036339 lymphocyte adhesion to endothelial cell of high endothelial venule;GO:0060506 smoothened signaling pathway involved in lung development;GO:0060792 sweat gland development		1	1	1	1	1	0	0	0	0	0	0	0	1	0	0	0	1	0	0	1
Fam91a1	210998	symbol	M. musculus	210998	M. musculus	Fam91a1	family with sequence similarity 91, member A1	GO:0099041 vesicle tethering to Golgi;GO:0099022 vesicle tethering;GO:0006903 vesicle targeting		0	0	0	0	0	0	0	0	0	0	0	0	0	0	0	0	0	0	0	0
Exosc4	109075	symbol	M. musculus	109075	M. musculus	Exosc4	exosome component 4	GO:0034475 U4 snRNA 3'-end processing;GO:0045006 DNA deamination;GO:0071051 polyadenylation-dependent snoRNA 3'-end processing		0	0	1	0	0	0	0	1	0	0	0	0	0	0	0	0	0	0	0	0
Dvl3	13544	symbol	M. musculus	13544	M. musculus	Dvl3	dishevelled segment polarity protein 3	GO:0150012 positive regulation of neuron projection arborization;GO:1904948 midbrain dopaminergic neuron differentiation;GO:0090179 planar cell polarity pathway involved in neural tube closure		1	0	1	1	0	0	0	1	0	0	0	0	1	0	0	1	0	0	0	0
Hspa9	15526	symbol	M. musculus	15526	M. musculus	Hspa9	heat shock protein 9	GO:1902037 negative regulation of hematopoietic stem cell differentiation;GO:0045647 negative regulation of erythrocyte differentiation;GO:1901533 negative regulation of hematopoietic progenitor cell differentiation		0	0	1	0	0	0	0	0	0	0	0	0	0	1	0	0	0	0	0	0
Dctn4	67665	symbol	M. musculus	67665	M. musculus	Dctn4	dynactin 4			1	0	1	0	0	0	0	0	0	0	0	0	0	0	0	0	0	0	0	0
Anxa1	16952	symbol	M. musculus	16952	M. musculus	Anxa1	annexin A1	GO:0070459 prolactin secretion;GO:0014839 myoblast migration involved in skeletal muscle regeneration;GO:0033031 positive regulation of neutrophil apoptotic process		0	0	0	1	0	0	1	0	0	1	0	0	0	1	0	1	0	0	0	1

## Sheet: Enrichment
GroupID	Category	Term	Description	LogP	Log(q-value)	Genes	Symbols	InTerm_InList
1_Summary	KEGG Pathway	mmu05016	Huntington disease - Mus musculus (house mouse)	-10.1894	-5.92945	11739,11946,12028,17991,19172,19173,26427,26445,26446,66152,66414,67305,67665,67951,69875,70316,228033,56228,13544,11983,11972,66290,15275,18648,18746,13849,14873,11821,13135,14042,14537,14595,67880,276846,17390,78070,56409,66928,116914	Slc25a4,Atp5f1a,Bax,Ndufa2,Psmb4,Psmb5,Creb3l1,Psmb2,Psmb3,Uqcr10,Ndufa12,Gpx7,Dctn4,Tubb6,Ndufa11,Ndufab1,Atp5mc3,Ube2j1,Dvl3,Atp5if1,Atp6v0d1,Atp6v1g1,Hk1,Pgam1,Pkm,Ephx1,Gsto1,Aprt,Dad1,Ext1,Gcnt1,B4galt1,Dcxr,Pigs,Mmp2,Cpt1c,Nudt3,Dmac1,Slc19a2	39/-
1_Member	KEGG Pathway	mmu05016	Huntington disease - Mus musculus (house mouse)	-10.1894	-5.92945	11739,11946,12028,17991,19172,19173,26427,26445,26446,66152,66414,67305,67665,67951,69875,70316,228033	Slc25a4,Atp5f1a,Bax,Ndufa2,Psmb4,Psmb5,Creb3l1,Psmb2,Psmb3,Uqcr10,Ndufa12,Gpx7,Dctn4,Tubb6,Ndufa11,Ndufab1,Atp5mc3	17/303
1_Member	KEGG Pathway	mmu05012	Parkinson disease - Mus musculus (house mouse)	-9.07059	-5.24297	11739,11946,12028,17991,19172,19173,26445,26446,56228,66152,66414,67951,69875,70316,228033	Slc25a4,Atp5f1a,Bax,Ndufa2,Psmb4,Psmb5,Psmb2,Psmb3,Ube2j1,Uqcr10,Ndufa12,Tubb6,Ndufa11,Ndufab1,Atp5mc3	15/266
1_Member	KEGG Pathway	mmu05020	Prion disease - Mus musculus (house mouse)	-9.02576	-5.24297	11739,11946,12028,17991,19172,19173,26427,26445,26446,66152,66414,67951,69875,70316,228033	Slc25a4,Atp5f1a,Bax,Ndufa2,Psmb4,Psmb5,Creb3l1,Psmb2,Psmb3,Uqcr10,Ndufa12,Tubb6,Ndufa11,Ndufab1,Atp5mc3	15/268
1_Member	KEGG Pathway	mmu05022	Pathways of neurodegeneration - multiple diseases - Mus musculus (house mouse)	-8.06342	-4.40558	11739,11946,12028,13544,17991,19172,19173,26445,26446,56228,66152,66414,67305,67665,67951,69875,70316,228033	Slc25a4,Atp5f1a,Bax,Dvl3,Ndufa2,Psmb4,Psmb5,Psmb2,Psmb3,Ube2j1,Uqcr10,Ndufa12,Gpx7,Dctn4,Tubb6,Ndufa11,Ndufab1,Atp5mc3	18/473
1_Member	KEGG Pathway	mmu05014	Amyotrophic lateral sclerosis - Mus musculus (house mouse)	-7.14655	-3.58561	11946,12028,17991,19172,19173,26445,26446,66152,66414,67305,67665,67951,69875,70316,228033	Atp5f1a,Bax,Ndufa2,Psmb4,Psmb5,Psmb2,Psmb3,Uqcr10,Ndufa12,Gpx7,Dctn4,Tubb6,Ndufa11,Ndufab1,Atp5mc3	15/370
1_Member	WikiPathways	WP295	Electron transport chain	-6.4593	-3.19939	11739,11946,11983,17991,66152,66414,70316,228033	Slc25a4,Atp5f1a,Atp5if1,Ndufa2,Uqcr10,Ndufa12,Ndufab1,Atp5mc3	8/93
1_Member	KEGG Pathway	mmu00190	Oxidative phosphorylation - Mus musculus (house mouse)	-6.22332	-3.00481	11946,11972,17991,66152,66290,66414,69875,70316,228033	Atp5f1a,Atp6v0d1,Ndufa2,Uqcr10,Atp6v1g1,Ndufa12,Ndufa11,Ndufab1,Atp5mc3	9/136
1_Member	KEGG Pathway	mmu05010	Alzheimer disease - Mus musculus (house mouse)	-6.14672	-2.966	11739,11946,13544,17991,19172,19173,26445,26446,66152,66414,67951,69875,70316,228033	Slc25a4,Atp5f1a,Dvl3,Ndufa2,Psmb4,Psmb5,Psmb2,Psmb3,Uqcr10,Ndufa12,Tubb6,Ndufa11,Ndufab1,Atp5mc3	14/384
1_Member	GO Biological Processes	GO:0046034	ATP metabolic process	-5.61095	-2.49717	11946,15275,17991,18648,18746,66414,69875,70316,228033	Atp5f1a,Hk1,Ndufa2,Pgam1,Pkm,Ndufa12,Ndufa11,Ndufab1,Atp5mc3	9/161
1_Member	KEGG Pathway	mmu05208	Chemical carcinogenesis - reactive oxygen species - Mus musculus (house mouse)	-5.2967	-2.26725	11739,11946,13849,14873,17991,66152,66414,69875,70316,228033	Slc25a4,Atp5f1a,Ephx1,Gsto1,Ndufa2,Uqcr10,Ndufa12,Ndufa11,Ndufab1,Atp5mc3	10/224
1_Member	GO Biological Processes	GO:0009205	purine ribonucleoside triphosphate metabolic process	-5.09899	-2.09436	11946,15275,17991,18648,18746,66414,69875,70316,228033	Atp5f1a,Hk1,Ndufa2,Pgam1,Pkm,Ndufa12,Ndufa11,Ndufab1,Atp5mc3	9/186
1_Member	GO Biological Processes	GO:0015986	proton motive force-driven ATP synthesis	-5.03526	-2.07639	11946,17991,66414,69875,70316,228033	Atp5f1a,Ndufa2,Ndufa12,Ndufa11,Ndufab1,Atp5mc3	6/68
1_Member	GO Biological Processes	GO:0009199	ribonucleoside triphosphate metabolic process	-4.96985	-2.05709	11946,15275,17991,18648,18746,66414,69875,70316,228033	Atp5f1a,Hk1,Ndufa2,Pgam1,Pkm,Ndufa12,Ndufa11,Ndufab1,Atp5mc3	9/193
1_Member	GO Biological Processes	GO:0009144	purine nucleoside triphosphate metabolic process	-4.93395	-2.05426	11946,15275,17991,18648,18746,66414,69875,70316,228033	Atp5f1a,Hk1,Ndufa2,Pgam1,Pkm,Ndufa12,Ndufa11,Ndufab1,Atp5mc3	9/195
1_Member	GO Biological Processes	GO:1901137	carbohydrate derivative biosynthetic process	-4.90823	-2.04627	11821,11946,13135,14042,14537,14595,17991,18648,56228,66414,67880,69875,70316,228033,276846	Aprt,Atp5f1a,Dad1,Ext1,Gcnt1,B4galt1,Ndufa2,Pgam1,Ube2j1,Ndufa12,Dcxr,Ndufa11,Ndufab1,Atp5mc3,Pigs	15/560
1_Member	GO Biological Processes	GO:0009141	nucleoside triphosphate metabolic process	-4.67779	-1.86505	11946,15275,17991,18648,18746,66414,69875,70316,228033	Atp5f1a,Hk1,Ndufa2,Pgam1,Pkm,Ndufa12,Ndufa11,Ndufab1,Atp5mc3	9/210
1_Member	KEGG Pathway	mmu05415	Diabetic cardiomyopathy - Mus musculus (house mouse)	-4.64527	-1.84777	11739,11946,17390,17991,66152,66414,69875,70316,228033	Slc25a4,Atp5f1a,Mmp2,Ndufa2,Uqcr10,Ndufa12,Ndufa11,Ndufab1,Atp5mc3	9/212
1_Member	GO Biological Processes	GO:0006754	ATP biosynthetic process	-4.62726	-1.84448	11946,17991,66414,69875,70316,228033	Atp5f1a,Ndufa2,Ndufa12,Ndufa11,Ndufab1,Atp5mc3	6/80
1_Member	KEGG Pathway	mmu04714	Thermogenesis - Mus musculus (house mouse)	-4.33888	-1.62304	11946,17991,26427,66152,66414,69875,70316,78070,228033	Atp5f1a,Ndufa2,Creb3l1,Uqcr10,Ndufa12,Ndufa11,Ndufab1,Cpt1c,Atp5mc3	9/232
1_Member	GO Biological Processes	GO:0009206	purine ribonucleoside triphosphate biosynthetic process	-4.28255	-1.59085	11946,17991,66414,69875,70316,228033	Atp5f1a,Ndufa2,Ndufa12,Ndufa11,Ndufab1,Atp5mc3	6/92
1_Member	GO Biological Processes	GO:0009145	purine nucleoside triphosphate biosynthetic process	-4.25613	-1.58729	11946,17991,66414,69875,70316,228033	Atp5f1a,Ndufa2,Ndufa12,Ndufa11,Ndufab1,Atp5mc3	6/93
1_Member	GO Biological Processes	GO:0009150	purine ribonucleotide metabolic process	-4.15839	-1.52714	11821,11946,15275,17991,18648,18746,56409,66414,69875,70316,228033	Aprt,Atp5f1a,Hk1,Ndufa2,Pgam1,Pkm,Nudt3,Ndufa12,Ndufa11,Ndufab1,Atp5mc3	11/367
1_Member	GO Biological Processes	GO:0009201	ribonucleoside triphosphate biosynthetic process	-4.15358	-1.52714	11946,17991,66414,69875,70316,228033	Atp5f1a,Ndufa2,Ndufa12,Ndufa11,Ndufab1,Atp5mc3	6/97
1_Member	GO Biological Processes	GO:0042776	proton motive force-driven mitochondrial ATP synthesis	-4.05418	-1.46638	11946,17991,66414,69875,70316	Atp5f1a,Ndufa2,Ndufa12,Ndufa11,Ndufab1	5/63
1_Member	GO Biological Processes	GO:0009142	nucleoside triphosphate biosynthetic process	-4.00839	-1.46157	11946,17991,66414,69875,70316,228033	Atp5f1a,Ndufa2,Ndufa12,Ndufa11,Ndufab1,Atp5mc3	6/103
1_Member	GO Biological Processes	GO:0006163	purine nucleotide metabolic process	-4.0053	-1.46157	11821,11946,15275,17991,18648,18746,56409,66414,67880,69875,70316,228033	Aprt,Atp5f1a,Hk1,Ndufa2,Pgam1,Pkm,Nudt3,Ndufa12,Dcxr,Ndufa11,Ndufab1,Atp5mc3	12/450
1_Member	GO Biological Processes	GO:0010257	NADH dehydrogenase complex assembly	-3.98908	-1.46157	17991,66414,66928,69875,70316	Ndufa2,Ndufa12,Dmac1,Ndufa11,Ndufab1	5/65
1_Member	GO Biological Processes	GO:0032981	mitochondrial respiratory chain complex I assembly	-3.98908	-1.46157	17991,66414,66928,69875,70316	Ndufa2,Ndufa12,Dmac1,Ndufa11,Ndufab1	5/65
1_Member	GO Biological Processes	GO:0009259	ribonucleotide metabolic process	-3.96422	-1.45097	11821,11946,15275,17991,18648,18746,56409,66414,69875,70316,228033	Aprt,Atp5f1a,Hk1,Ndufa2,Pgam1,Pkm,Nudt3,Ndufa12,Ndufa11,Ndufab1,Atp5mc3	11/386
1_Member	GO Biological Processes	GO:0019693	ribose phosphate metabolic process	-3.82881	-1.39498	11821,11946,15275,17991,18648,18746,56409,66414,69875,70316,228033	Aprt,Atp5f1a,Hk1,Ndufa2,Pgam1,Pkm,Nudt3,Ndufa12,Ndufa11,Ndufab1,Atp5mc3	11/400
1_Member	GO Biological Processes	GO:0006119	oxidative phosphorylation	-3.7449	-1.33158	11946,17991,66152,66414,69875,70316	Atp5f1a,Ndufa2,Uqcr10,Ndufa12,Ndufa11,Ndufab1	6/115
1_Member	CORUM	CORUM:382	Respiratory chain complex I, mitochondrial	-3.72515	-1.32857	17991,66414,69875,70316	Ndufa2,Ndufa12,Ndufa11,Ndufab1	4/40
1_Member	GO Biological Processes	GO:0072521	purine-containing compound metabolic process	-3.71122	-1.32055	11821,11946,15275,17991,18648,18746,56409,66414,67880,69875,70316,228033	Aprt,Atp5f1a,Hk1,Ndufa2,Pgam1,Pkm,Nudt3,Ndufa12,Dcxr,Ndufa11,Ndufab1,Atp5mc3	12/484
1_Member	GO Biological Processes	GO:0009152	purine ribonucleotide biosynthetic process	-3.5979	-1.25707	11821,11946,17991,66414,69875,70316,228033	Aprt,Atp5f1a,Ndufa2,Ndufa12,Ndufa11,Ndufab1,Atp5mc3	7/173
1_Member	GO Biological Processes	GO:0006091	generation of precursor metabolites and energy	-3.5705	-1.24808	11946,12028,15275,17991,18648,18746,66152,66414,69875,70316	Atp5f1a,Bax,Hk1,Ndufa2,Pgam1,Pkm,Uqcr10,Ndufa12,Ndufa11,Ndufab1	10/359
1_Member	GO Biological Processes	GO:0009117	nucleotide metabolic process	-3.55859	-1.24808	11821,11946,15275,17991,18648,18746,56409,66414,67880,69875,70316,228033	Aprt,Atp5f1a,Hk1,Ndufa2,Pgam1,Pkm,Nudt3,Ndufa12,Dcxr,Ndufa11,Ndufab1,Atp5mc3	12/503
1_Member	GO Biological Processes	GO:0006753	nucleoside phosphate metabolic process	-3.50431	-1.21003	11821,11946,15275,17991,18648,18746,56409,66414,67880,69875,70316,228033	Aprt,Atp5f1a,Hk1,Ndufa2,Pgam1,Pkm,Nudt3,Ndufa12,Dcxr,Ndufa11,Ndufab1,Atp5mc3	12/510
1_Member	Reactome Gene Sets	R-MMU-163200	Respiratory electron transport, ATP synthesis by chemiosmotic coupling, and heat production by uncoupling proteins.	-3.49291	-1.20613	11946,17991,66152,66414,70316,228033	Atp5f1a,Ndufa2,Uqcr10,Ndufa12,Ndufab1,Atp5mc3	6/128
1_Member	GO Biological Processes	GO:0009260	ribonucleotide biosynthetic process	-3.42139	-1.18268	11821,11946,17991,66414,69875,70316,228033	Aprt,Atp5f1a,Ndufa2,Ndufa12,Ndufa11,Ndufab1,Atp5mc3	7/185
1_Member	GO Biological Processes	GO:0045333	cellular respiration	-3.33821	-1.12362	11946,12028,17991,66152,66414,69875,70316	Atp5f1a,Bax,Ndufa2,Uqcr10,Ndufa12,Ndufa11,Ndufab1	7/191
1_Member	GO Biological Processes	GO:0046390	ribose phosphate biosynthetic process	-3.31117	-1.11573	11821,11946,17991,66414,69875,70316,228033	Aprt,Atp5f1a,Ndufa2,Ndufa12,Ndufa11,Ndufab1,Atp5mc3	7/193
1_Member	WikiPathways	WP1248	Oxidative phosphorylation	-3.21971	-1.06647	11946,17991,69875,228033	Atp5f1a,Ndufa2,Ndufa11,Atp5mc3	4/54
1_Member	GO Biological Processes	GO:0006164	purine nucleotide biosynthetic process	-3.21916	-1.06647	11821,11946,17991,66414,69875,70316,228033	Aprt,Atp5f1a,Ndufa2,Ndufa12,Ndufa11,Ndufab1,Atp5mc3	7/200
1_Member	Reactome Gene Sets	R-MMU-1428517	Aerobic respiration and respiratory electron transport	-3.16832	-1.03552	11946,17991,18746,66152,66414,70316,228033	Atp5f1a,Ndufa2,Pkm,Uqcr10,Ndufa12,Ndufab1,Atp5mc3	7/204
1_Member	GO Biological Processes	GO:0072522	purine-containing compound biosynthetic process	-3.13098	-1.02577	11821,11946,17991,66414,69875,70316,228033	Aprt,Atp5f1a,Ndufa2,Ndufa12,Ndufa11,Ndufab1,Atp5mc3	7/207
1_Member	GO Biological Processes	GO:0055086	nucleobase-containing small molecule metabolic process	-3.12394	-1.0224	11821,11946,15275,17991,18648,18746,56409,66414,67880,69875,70316,228033	Aprt,Atp5f1a,Hk1,Ndufa2,Pgam1,Pkm,Nudt3,Ndufa12,Dcxr,Ndufa11,Ndufab1,Atp5mc3	12/563
1_Member	GO Biological Processes	GO:0090407	organophosphate biosynthetic process	-3.11477	-1.01623	11821,11946,17991,18648,66414,67880,69875,70316,116914,228033,276846	Aprt,Atp5f1a,Ndufa2,Pgam1,Ndufa12,Dcxr,Ndufa11,Ndufab1,Slc19a2,Atp5mc3,Pigs	11/486
1_Member	GO Biological Processes	GO:0033108	mitochondrial respiratory chain complex assembly	-3.03935	-0.97535	17991,66414,66928,69875,70316	Ndufa2,Ndufa12,Dmac1,Ndufa11,Ndufab1	5/104
1_Member	KEGG Pathway	mmu04932	Non-alcoholic fatty liver disease - Mus musculus (house mouse)	-3.02458	-0.963338	12028,17991,66152,66414,69875,70316	Bax,Ndufa2,Uqcr10,Ndufa12,Ndufa11,Ndufab1	6/157
1_Member	GO Biological Processes	GO:0009060	aerobic respiration	-3.0103	-0.954516	11946,17991,66152,66414,69875,70316	Atp5f1a,Ndufa2,Uqcr10,Ndufa12,Ndufa11,Ndufab1	6/158
1_Member	GO Biological Processes	GO:0009165	nucleotide biosynthetic process	-2.82232	-0.846674	11821,11946,17991,66414,69875,70316,228033	Aprt,Atp5f1a,Ndufa2,Ndufa12,Ndufa11,Ndufab1,Atp5mc3	7/234
1_Member	GO Biological Processes	GO:1901293	nucleoside phosphate biosynthetic process	-2.80124	-0.845227	11821,11946,17991,66414,69875,70316,228033	Aprt,Atp5f1a,Ndufa2,Ndufa12,Ndufa11,Ndufab1,Atp5mc3	7/236
1_Member	CORUM	CORUM:381	Respiratory chain complex I, mitochondrial	-2.63197	-0.762996	17991,66414,70316	Ndufa2,Ndufa12,Ndufab1	3/37
1_Member	GO Biological Processes	GO:0015980	energy derivation by oxidation of organic compounds	-2.55533	-0.715266	11946,12028,17991,66152,66414,69875,70316	Atp5f1a,Bax,Ndufa2,Uqcr10,Ndufa12,Ndufa11,Ndufab1	7/261
1_Member	Reactome Gene Sets	R-MMU-611105	Respiratory electron transport	-2.17665	-0.47305	17991,66152,66414,70316	Ndufa2,Uqcr10,Ndufa12,Ndufab1	4/104
1_Member	Reactome Gene Sets	R-MMU-6799198	Complex I biogenesis	-2.10127	-0.417318	17991,66414,70316	Ndufa2,Ndufa12,Ndufab1	3/57
2_Summary	GO Biological Processes	GO:0030198	extracellular matrix organization	-6.9666	-3.57372	12831,12837,14042,14595,16948,16950,17390,20319,26427,50706,56693,104009,239337,12028,12578,13007,17246,17913,71994,320878,21825,70804,329278	Col5a1,Col8a1,Ext1,B4galt1,Lox,Loxl3,Mmp2,Sfrp2,Creb3l1,Postn,Crtap,Qsox1,Adamts12,Bax,Cdkn2a,Csrp1,Mdm2,Myo1c,Cnn3,Mical2,Thbs1,Pgrmc2,Tnn	23/-
2_Member	GO Biological Processes	GO:0030198	extracellular matrix organization	-6.9666	-3.57372	12831,12837,14042,14595,16948,16950,17390,20319,26427,50706,56693,104009,239337	Col5a1,Col8a1,Ext1,B4galt1,Lox,Loxl3,Mmp2,Sfrp2,Creb3l1,Postn,Crtap,Qsox1,Adamts12	13/278
2_Member	GO Biological Processes	GO:0045229	external encapsulating structure organization	-6.94853	-3.57372	12831,12837,14042,14595,16948,16950,17390,20319,26427,50706,56693,104009,239337	Col5a1,Col8a1,Ext1,B4galt1,Lox,Loxl3,Mmp2,Sfrp2,Creb3l1,Postn,Crtap,Qsox1,Adamts12	13/279
2_Member	GO Biological Processes	GO:0043062	extracellular structure organization	-6.93054	-3.57372	12831,12837,14042,14595,16948,16950,17390,20319,26427,50706,56693,104009,239337	Col5a1,Col8a1,Ext1,B4galt1,Lox,Loxl3,Mmp2,Sfrp2,Creb3l1,Postn,Crtap,Qsox1,Adamts12	13/280
2_Member	GO Biological Processes	GO:0030199	collagen fibril organization	-6.78631	-3.48065	12831,14042,16948,16950,20319,56693,239337	Col5a1,Ext1,Lox,Loxl3,Sfrp2,Crtap,Adamts12	7/57
2_Member	GO Biological Processes	GO:0097435	supramolecular fiber organization	-4.10068	-1.49399	12028,12578,12831,13007,14042,16948,16950,17246,17913,20319,56693,71994,239337,320878	Bax,Cdkn2a,Col5a1,Csrp1,Ext1,Lox,Loxl3,Mdm2,Myo1c,Sfrp2,Crtap,Cnn3,Adamts12,Mical2	14/583
2_Member	Reactome Gene Sets	R-MMU-2022090	Assembly of collagen fibrils and other multimeric structures	-3.48782	-1.20564	12831,12837,16948,16950	Col5a1,Col8a1,Lox,Loxl3	4/46
2_Member	Reactome Gene Sets	R-MMU-1474290	Collagen formation	-2.7958	-0.845227	12831,12837,16948,16950	Col5a1,Col8a1,Lox,Loxl3	4/70
2_Member	GO Biological Processes	GO:0061448	connective tissue development	-2.58322	-0.73156	12831,14042,16948,20319,21825,70804,239337	Col5a1,Ext1,Lox,Sfrp2,Thbs1,Pgrmc2,Adamts12	7/258
2_Member	Reactome Gene Sets	R-MMU-1442490	Collagen degradation	-2.25952	-0.520664	12831,12837,17390	Col5a1,Col8a1,Mmp2	3/50
2_Member	Reactome Gene Sets	R-MMU-1474244	Extracellular matrix organization	-2.10457	-0.418699	12831,12837,16948,16950,17390,329278	Col5a1,Col8a1,Lox,Loxl3,Mmp2,Tnn	6/241
3_Summary	CORUM	CORUM:38	20S proteasome	-5.62279	-2.49717	19172,19173,26445,26446,11972,14870,15526,17246,66290,67204,67305,67665,67951,68097,70804,12443,21951,13544,84035,69601,23825,108911,68151,110355,109075,18148,22628,217718,14042,14733,17390,50762,56228,66515,66914,239337,22330,23980,11739	Psmb4,Psmb5,Psmb2,Psmb3,Atp6v0d1,Gstp1,Hspa9,Mdm2,Atp6v1g1,Eif2s2,Gpx7,Dctn4,Tubb6,Dynll2,Pgrmc2,Ccnd1,Tnks,Dvl3,Kremen1,Dab2ip,Banf1,Rcc2,Wls,Grk2,Exosc4,Npm1,Ywhag,Nek9,Ext1,Gpc1,Mmp2,Fbxo6,Ube2j1,Cul7,Vps28,Adamts12,Vcl,Pebp1,Slc25a4	39/-
3_Member	CORUM	CORUM:38	20S proteasome	-5.62279	-2.49717	19172,19173,26445,26446	Psmb4,Psmb5,Psmb2,Psmb3	4/14
3_Member	Reactome Gene Sets	R-MMU-2262752	Cellular responses to stress	-5.44466	-2.36807	11972,14870,15526,17246,19172,19173,26445,26446,66290,67204,67305,67665,67951,68097,70804	Atp6v0d1,Gstp1,Hspa9,Mdm2,Psmb4,Psmb5,Psmb2,Psmb3,Atp6v1g1,Eif2s2,Gpx7,Dctn4,Tubb6,Dynll2,Pgrmc2	15/505
3_Member	Reactome Gene Sets	R-MMU-8953897	Cellular responses to stimuli	-5.42386	-2.36807	11972,14870,15526,17246,19172,19173,26445,26446,66290,67204,67305,67665,67951,68097,70804	Atp6v0d1,Gstp1,Hspa9,Mdm2,Psmb4,Psmb5,Psmb2,Psmb3,Atp6v1g1,Eif2s2,Gpx7,Dctn4,Tubb6,Dynll2,Pgrmc2	15/507
3_Member	Reactome Gene Sets	R-MMU-8878159	Transcriptional regulation by RUNX3	-4.75522	-1.92668	12443,17246,19172,19173,26445,26446	Ccnd1,Mdm2,Psmb4,Psmb5,Psmb2,Psmb3	6/76
3_Member	Reactome Gene Sets	R-MMU-75815	Ubiquitin-dependent degradation of Cyclin D	-4.50024	-1.74548	12443,19172,19173,26445,26446	Ccnd1,Psmb4,Psmb5,Psmb2,Psmb3	5/51
3_Member	Reactome Gene Sets	R-MMU-8941858	Regulation of RUNX3 expression and activity	-4.41829	-1.6769	17246,19172,19173,26445,26446	Mdm2,Psmb4,Psmb5,Psmb2,Psmb3	5/53
3_Member	Reactome Gene Sets	R-MMU-4641257	Degradation of AXIN	-4.33969	-1.62304	19172,19173,21951,26445,26446	Psmb4,Psmb5,Tnks,Psmb2,Psmb3	5/55
3_Member	Reactome Gene Sets	R-MMU-69541	Stabilization of p53	-4.30157	-1.59797	17246,19172,19173,26445,26446	Mdm2,Psmb4,Psmb5,Psmb2,Psmb3	5/56
3_Member	Reactome Gene Sets	R-MMU-4641258	Degradation of DVL	-4.26419	-1.58729	13544,19172,19173,26445,26446	Dvl3,Psmb4,Psmb5,Psmb2,Psmb3	5/57
3_Member	Reactome Gene Sets	R-MMU-187577	SCF(Skp2)-mediated degradation of p27/p21	-4.15627	-1.52714	12443,19172,19173,26445,26446	Ccnd1,Psmb4,Psmb5,Psmb2,Psmb3	5/60
3_Member	Reactome Gene Sets	R-MMU-8878166	Transcriptional regulation by RUNX2	-4.05418	-1.46638	12443,19172,19173,26445,26446	Ccnd1,Psmb4,Psmb5,Psmb2,Psmb3	5/63
3_Member	Reactome Gene Sets	R-MMU-69563	p53-Dependent G1 DNA Damage Response	-4.02135	-1.46157	17246,19172,19173,26445,26446	Mdm2,Psmb4,Psmb5,Psmb2,Psmb3	5/64
3_Member	Reactome Gene Sets	R-MMU-69580	p53-Dependent G1/S DNA damage checkpoint	-4.02135	-1.46157	17246,19172,19173,26445,26446	Mdm2,Psmb4,Psmb5,Psmb2,Psmb3	5/64
3_Member	Reactome Gene Sets	R-MMU-69615	G1/S DNA Damage Checkpoints	-3.95735	-1.45097	17246,19172,19173,26445,26446	Mdm2,Psmb4,Psmb5,Psmb2,Psmb3	5/66
3_Member	Reactome Gene Sets	R-MMU-201681	TCF dependent signaling in response to WNT	-3.9447	-1.44822	13544,19172,19173,21951,26445,26446,84035	Dvl3,Psmb4,Psmb5,Tnks,Psmb2,Psmb3,Kremen1	7/152
3_Member	Reactome Gene Sets	R-MMU-5658442	Regulation of RAS by GAPs	-3.92616	-1.43711	19172,19173,26445,26446,69601	Psmb4,Psmb5,Psmb2,Psmb3,Dab2ip	5/67
3_Member	CORUM	CORUM:39	Immunoproteasome	-3.90897	-1.4344	19172,26445,26446	Psmb4,Psmb2,Psmb3	3/14
3_Member	Reactome Gene Sets	R-MMU-8948751	Regulation of PTEN stability and activity	-3.89549	-1.42797	19172,19173,21951,26445,26446	Psmb4,Psmb5,Tnks,Psmb2,Psmb3	5/68
3_Member	Reactome Gene Sets	R-MMU-69202	Cyclin E associated events during G1/S transition	-3.83561	-1.39498	12443,19172,19173,26445,26446	Ccnd1,Psmb4,Psmb5,Psmb2,Psmb3	5/70
3_Member	Reactome Gene Sets	R-MMU-69656	Cyclin A:Cdk2-associated events at S phase entry	-3.77762	-1.35023	12443,19172,19173,26445,26446	Ccnd1,Psmb4,Psmb5,Psmb2,Psmb3	5/72
3_Member	Reactome Gene Sets	R-MMU-68882	Mitotic Anaphase	-3.74771	-1.33158	19172,19173,23825,26445,26446,67951,68097,108911	Psmb4,Psmb5,Banf1,Psmb2,Psmb3,Tubb6,Dynll2,Rcc2	8/218
3_Member	Reactome Gene Sets	R-MMU-2555396	Mitotic Metaphase and Anaphase	-3.73415	-1.33158	19172,19173,23825,26445,26446,67951,68097,108911	Psmb4,Psmb5,Banf1,Psmb2,Psmb3,Tubb6,Dynll2,Rcc2	8/219
3_Member	Reactome Gene Sets	R-MMU-8852276	The role of GTSE1 in G2/M progression after G2 checkpoint	-3.69393	-1.31188	19172,19173,26445,26446,67951	Psmb4,Psmb5,Psmb2,Psmb3,Tubb6	5/75
3_Member	Reactome Gene Sets	R-MMU-195721	Signaling by WNT	-3.57706	-1.24808	13544,19172,19173,21951,26445,26446,68151,84035	Dvl3,Psmb4,Psmb5,Tnks,Psmb2,Psmb3,Wls,Kremen1	8/231
3_Member	Reactome Gene Sets	R-MMU-5632684	Hedgehog 'on' state	-3.53727	-1.23161	19172,19173,26445,26446,110355	Psmb4,Psmb5,Psmb2,Psmb3,Grk2	5/81
3_Member	Reactome Gene Sets	R-MMU-2467813	Separation of Sister Chromatids	-3.46421	-1.18658	19172,19173,26445,26446,67951,68097,108911	Psmb4,Psmb5,Psmb2,Psmb3,Tubb6,Dynll2,Rcc2	7/182
3_Member	KEGG Pathway	mmu03050	Proteasome - Mus musculus (house mouse)	-3.4516	-1.18398	19172,19173,26445,26446	Psmb4,Psmb5,Psmb2,Psmb3	4/47
3_Member	Reactome Gene Sets	R-MMU-450531	Regulation of mRNA stability by proteins that bind AU-rich elements	-3.43993	-1.18398	19172,19173,26445,26446,109075	Psmb4,Psmb5,Psmb2,Psmb3,Exosc4	5/85
3_Member	Reactome Gene Sets	R-MMU-1640170	Cell Cycle	-3.43853	-1.18398	12443,17246,18148,19172,19173,22628,23825,26445,26446,67951,68097,108911,217718	Ccnd1,Mdm2,Npm1,Psmb4,Psmb5,Ywhag,Banf1,Psmb2,Psmb3,Tubb6,Dynll2,Rcc2,Nek9	13/596
3_Member	Reactome Gene Sets	R-MMU-4086400	PCP/CE pathway	-3.39318	-1.15858	13544,19172,19173,26445,26446	Dvl3,Psmb4,Psmb5,Psmb2,Psmb3	5/87
3_Member	Reactome Gene Sets	R-MMU-1236978	Cross-presentation of soluble exogenous antigens (endosomes)	-3.38164	-1.15112	19172,19173,26445,26446	Psmb4,Psmb5,Psmb2,Psmb3	4/49
3_Member	Reactome Gene Sets	R-MMU-5358351	Signaling by Hedgehog	-3.35214	-1.13363	19172,19173,26445,26446,67951,110355	Psmb4,Psmb5,Psmb2,Psmb3,Tubb6,Grk2	6/136
3_Member	Reactome Gene Sets	R-MMU-350562	Regulation of ornithine decarboxylase (ODC)	-3.31476	-1.11573	19172,19173,26445,26446	Psmb4,Psmb5,Psmb2,Psmb3	4/51
3_Member	Reactome Gene Sets	R-MMU-9762114	GSK3B and BTRC:CUL1-mediated-degradation of NFE2L2	-3.31476	-1.11573	19172,19173,26445,26446	Psmb4,Psmb5,Psmb2,Psmb3	4/51
3_Member	Reactome Gene Sets	R-MMU-349425	Autodegradation of the E3 ubiquitin ligase COP1	-3.28241	-1.10529	19172,19173,26445,26446	Psmb4,Psmb5,Psmb2,Psmb3	4/52
3_Member	Reactome Gene Sets	R-MMU-69601	Ubiquitin Mediated Degradation of Phosphorylated Cdc25A	-3.28241	-1.10529	19172,19173,26445,26446	Psmb4,Psmb5,Psmb2,Psmb3	4/52
3_Member	Reactome Gene Sets	R-MMU-69610	p53-Independent DNA Damage Response	-3.28241	-1.10529	19172,19173,26445,26446	Psmb4,Psmb5,Psmb2,Psmb3	4/52
3_Member	Reactome Gene Sets	R-MMU-69613	p53-Independent G1/S DNA damage checkpoint	-3.28241	-1.10529	19172,19173,26445,26446	Psmb4,Psmb5,Psmb2,Psmb3	4/52
3_Member	Reactome Gene Sets	R-MMU-8939902	Regulation of RUNX2 expression and activity	-3.28241	-1.10529	19172,19173,26445,26446	Psmb4,Psmb5,Psmb2,Psmb3	4/52
3_Member	Reactome Gene Sets	R-MMU-68886	M Phase	-3.2536	-1.08712	19172,19173,22628,23825,26445,26446,67951,68097,108911,217718	Psmb4,Psmb5,Ywhag,Banf1,Psmb2,Psmb3,Tubb6,Dynll2,Rcc2,Nek9	10/394
3_Member	Reactome Gene Sets	R-MMU-8854050	FBXL7 down-regulates AURKA during mitotic entry and in early mitosis	-3.21971	-1.06647	19172,19173,26445,26446	Psmb4,Psmb5,Psmb2,Psmb3	4/54
3_Member	Reactome Gene Sets	R-MMU-6807070	PTEN Regulation	-3.19692	-1.0476	19172,19173,21951,26445,26446	Psmb4,Psmb5,Tnks,Psmb2,Psmb3	5/96
3_Member	Reactome Gene Sets	R-MMU-9759194	Nuclear events mediated by NFE2L2	-3.18932	-1.04402	19172,19173,26445,26446	Psmb4,Psmb5,Psmb2,Psmb3	4/55
3_Member	Reactome Gene Sets	R-MMU-450408	AUF1 (hnRNP D0) binds and destabilizes mRNA	-3.15954	-1.03317	19172,19173,26445,26446	Psmb4,Psmb5,Psmb2,Psmb3	4/56
3_Member	Reactome Gene Sets	R-MMU-5610780	Degradation of GLI1 by the proteasome	-3.15954	-1.03317	19172,19173,26445,26446	Psmb4,Psmb5,Psmb2,Psmb3	4/56
3_Member	Reactome Gene Sets	R-MMU-382556	ABC-family proteins mediated transport	-3.13613	-1.02577	19172,19173,26445,26446,67204	Psmb4,Psmb5,Psmb2,Psmb3,Eif2s2	5/99
3_Member	Reactome Gene Sets	R-MMU-5607761	Dectin-1 mediated noncanonical NF-kB signaling	-3.13034	-1.02577	19172,19173,26445,26446	Psmb4,Psmb5,Psmb2,Psmb3	4/57
3_Member	Reactome Gene Sets	R-MMU-5610785	GLI3 is processed to GLI3R by the proteasome	-3.13034	-1.02577	19172,19173,26445,26446	Psmb4,Psmb5,Psmb2,Psmb3	4/57
3_Member	Reactome Gene Sets	R-MMU-5676590	NIK-->noncanonical NF-kB signaling	-3.13034	-1.02577	19172,19173,26445,26446	Psmb4,Psmb5,Psmb2,Psmb3	4/57
3_Member	Reactome Gene Sets	R-MMU-351202	Metabolism of polyamines	-3.07362	-0.983977	19172,19173,26445,26446	Psmb4,Psmb5,Psmb2,Psmb3	4/59
3_Member	GO Biological Processes	GO:0030163	protein catabolic process	-3.05884	-0.97535	14042,14733,17246,17390,19172,19173,26445,26446,50762,56228,66515,66914,69601,239337	Ext1,Gpc1,Mdm2,Mmp2,Psmb4,Psmb5,Psmb2,Psmb3,Fbxo6,Ube2j1,Cul7,Vps28,Dab2ip,Adamts12	14/739
3_Member	Reactome Gene Sets	R-MMU-69620	Cell Cycle Checkpoints	-3.04652	-0.97535	17246,19172,19173,22628,26445,26446,68097,108911	Mdm2,Psmb4,Psmb5,Ywhag,Psmb2,Psmb3,Dynll2,Rcc2	8/278
3_Member	Reactome Gene Sets	R-MMU-5610787	Hedgehog 'off' state	-3.03935	-0.97535	19172,19173,26445,26446,67951	Psmb4,Psmb5,Psmb2,Psmb3,Tubb6	5/104
3_Member	Reactome Gene Sets	R-MMU-69206	G1/S Transition	-3.03935	-0.97535	12443,19172,19173,26445,26446	Ccnd1,Psmb4,Psmb5,Psmb2,Psmb3	5/104
3_Member	Reactome Gene Sets	R-MMU-9711123	Cellular response to chemical stress	-2.99612	-0.949027	14870,19172,19173,26445,26446,67305	Gstp1,Psmb4,Psmb5,Psmb2,Psmb3,Gpx7	6/159
3_Member	Reactome Gene Sets	R-MMU-4608870	Asymmetric localization of PCP proteins	-2.99244	-0.949027	19172,19173,26445,26446	Psmb4,Psmb5,Psmb2,Psmb3	4/62
3_Member	Reactome Gene Sets	R-MMU-5358346	Hedgehog ligand biogenesis	-2.96635	-0.931124	19172,19173,26445,26446	Psmb4,Psmb5,Psmb2,Psmb3	4/63
3_Member	Reactome Gene Sets	R-MMU-1169091	Activation of NF-kappaB in B cells	-2.94072	-0.924117	19172,19173,26445,26446	Psmb4,Psmb5,Psmb2,Psmb3	4/64
3_Member	Reactome Gene Sets	R-MMU-174084	Autodegradation of Cdh1 by Cdh1:APC/C	-2.94072	-0.924117	19172,19173,26445,26446	Psmb4,Psmb5,Psmb2,Psmb3	4/64
3_Member	Reactome Gene Sets	R-MMU-69278	Cell Cycle, Mitotic	-2.93861	-0.924117	12443,19172,19173,22628,23825,26445,26446,67951,68097,108911,217718	Ccnd1,Psmb4,Psmb5,Ywhag,Banf1,Psmb2,Psmb3,Tubb6,Dynll2,Rcc2,Nek9	11/511
3_Member	Reactome Gene Sets	R-MMU-1234176	Oxygen-dependent proline hydroxylation of Hypoxia-inducible Factor Alpha	-2.89077	-0.898715	19172,19173,26445,26446	Psmb4,Psmb5,Psmb2,Psmb3	4/66
3_Member	Reactome Gene Sets	R-MMU-8939236	RUNX1 regulates transcription of genes involved in differentiation of HSCs	-2.89077	-0.898715	19172,19173,26445,26446	Psmb4,Psmb5,Psmb2,Psmb3	4/66
3_Member	Reactome Gene Sets	R-MMU-174154	APC/C:Cdc20 mediated degradation of Securin	-2.8425	-0.861353	19172,19173,26445,26446	Psmb4,Psmb5,Psmb2,Psmb3	4/68
3_Member	Reactome Gene Sets	R-MMU-69275	G2/M Transition	-2.80822	-0.845227	19172,19173,22628,26445,26446,67951	Psmb4,Psmb5,Ywhag,Psmb2,Psmb3,Tubb6	6/173
3_Member	Reactome Gene Sets	R-MMU-1234174	Cellular response to hypoxia	-2.7958	-0.845227	19172,19173,26445,26446	Psmb4,Psmb5,Psmb2,Psmb3	4/70
3_Member	Reactome Gene Sets	R-MMU-68949	Orc1 removal from chromatin	-2.7958	-0.845227	19172,19173,26445,26446	Psmb4,Psmb5,Psmb2,Psmb3	4/70
3_Member	Reactome Gene Sets	R-MMU-453274	Mitotic G2-G2/M phases	-2.78287	-0.840821	19172,19173,22628,26445,26446,67951	Psmb4,Psmb5,Ywhag,Psmb2,Psmb3,Tubb6	6/175
3_Member	Reactome Gene Sets	R-MMU-9006925	Intracellular signaling by second messengers	-2.77002	-0.8385	17246,19172,19173,21951,26445,26446,110355	Mdm2,Psmb4,Psmb5,Tnks,Psmb2,Psmb3,Grk2	7/239
3_Member	Reactome Gene Sets	R-MMU-174184	Cdc20:Phospho-APC/C mediated degradation of Cyclin A	-2.7285	-0.814954	19172,19173,26445,26446	Psmb4,Psmb5,Psmb2,Psmb3	4/73
3_Member	Reactome Gene Sets	R-MMU-5687128	MAPK6/MAPK4 signaling	-2.7285	-0.814954	19172,19173,26445,26446	Psmb4,Psmb5,Psmb2,Psmb3	4/73
3_Member	Reactome Gene Sets	R-MMU-69017	CDK-mediated phosphorylation and removal of Cdc6	-2.7285	-0.814954	19172,19173,26445,26446	Psmb4,Psmb5,Psmb2,Psmb3	4/73
3_Member	Reactome Gene Sets	R-MMU-174178	APC/C:Cdh1 mediated degradation of Cdc20 and other APC/C:Cdh1 targeted proteins in late mitosis/early G1	-2.70676	-0.800968	19172,19173,26445,26446	Psmb4,Psmb5,Psmb2,Psmb3	4/74
3_Member	Reactome Gene Sets	R-MMU-179419	APC:Cdc20 mediated degradation of cell cycle proteins prior to satisfation of the cell cycle checkpoint	-2.70676	-0.800968	19172,19173,26445,26446	Psmb4,Psmb5,Psmb2,Psmb3	4/74
3_Member	Reactome Gene Sets	R-MMU-3858494	Beta-catenin independent WNT signaling	-2.69998	-0.799009	13544,19172,19173,26445,26446	Dvl3,Psmb4,Psmb5,Psmb2,Psmb3	5/124
3_Member	Reactome Gene Sets	R-MMU-5689880	Ub-specific processing proteases	-2.69688	-0.798699	17246,19172,19173,21951,26445,26446	Mdm2,Psmb4,Psmb5,Tnks,Psmb2,Psmb3	6/182
3_Member	Reactome Gene Sets	R-MMU-1168372	Downstream signaling events of B Cell Receptor (BCR)	-2.66426	-0.778168	19172,19173,26445,26446	Psmb4,Psmb5,Psmb2,Psmb3	4/76
3_Member	Reactome Gene Sets	R-MMU-176409	APC/C:Cdc20 mediated degradation of mitotic proteins	-2.66426	-0.778168	19172,19173,26445,26446	Psmb4,Psmb5,Psmb2,Psmb3	4/76
3_Member	Reactome Gene Sets	R-MMU-9755511	KEAP1-NFE2L2 pathway	-2.66426	-0.778168	19172,19173,26445,26446	Psmb4,Psmb5,Psmb2,Psmb3	4/76
3_Member	Reactome Gene Sets	R-MMU-176814	Activation of APC/C and APC/C:Cdc20 mediated degradation of mitotic proteins	-2.64349	-0.770973	19172,19173,26445,26446	Psmb4,Psmb5,Psmb2,Psmb3	4/77
3_Member	Reactome Gene Sets	R-MMU-195253	Degradation of beta-catenin by the destruction complex	-2.64349	-0.770973	19172,19173,26445,26446	Psmb4,Psmb5,Psmb2,Psmb3	4/77
3_Member	Reactome Gene Sets	R-MMU-2871837	FCERI mediated NF-kB activation	-2.64349	-0.770973	19172,19173,26445,26446	Psmb4,Psmb5,Psmb2,Psmb3	4/77
3_Member	Reactome Gene Sets	R-MMU-453279	Mitotic G1 phase and G1/S transition	-2.63979	-0.769052	12443,19172,19173,26445,26446	Ccnd1,Psmb4,Psmb5,Psmb2,Psmb3	5/128
3_Member	Reactome Gene Sets	R-MMU-68867	Assembly of the pre-replicative complex	-2.54402	-0.707359	19172,19173,26445,26446	Psmb4,Psmb5,Psmb2,Psmb3	4/82
3_Member	Reactome Gene Sets	R-MMU-5673001	RAF/MAP kinase cascade	-2.50077	-0.681775	19172,19173,22330,23980,26445,26446,69601	Psmb4,Psmb5,Vcl,Pebp1,Psmb2,Psmb3,Dab2ip	7/267
3_Member	Reactome Gene Sets	R-MMU-202424	Downstream TCR signaling	-2.48761	-0.673305	19172,19173,26445,26446	Psmb4,Psmb5,Psmb2,Psmb3	4/85
3_Member	KEGG Pathway	mmu05017	Spinocerebellar ataxia - Mus musculus (house mouse)	-2.4586	-0.652018	11739,19172,19173,26445,26446	Slc25a4,Psmb4,Psmb5,Psmb2,Psmb3	5/141
3_Member	Reactome Gene Sets	R-MMU-174143	APC/C-mediated degradation of cell cycle proteins	-2.45125	-0.647714	19172,19173,26445,26446	Psmb4,Psmb5,Psmb2,Psmb3	4/87
3_Member	Reactome Gene Sets	R-MMU-453276	Regulation of mitotic cell cycle	-2.45125	-0.647714	19172,19173,26445,26446	Psmb4,Psmb5,Psmb2,Psmb3	4/87
3_Member	Reactome Gene Sets	R-MMU-5684996	MAPK1/MAPK3 signaling	-2.44777	-0.645747	19172,19173,22330,23980,26445,26446,69601	Psmb4,Psmb5,Vcl,Pebp1,Psmb2,Psmb3,Dab2ip	7/273
3_Member	Reactome Gene Sets	R-MMU-69242	S Phase	-2.41962	-0.625765	12443,19172,19173,26445,26446	Ccnd1,Psmb4,Psmb5,Psmb2,Psmb3	5/144
3_Member	Reactome Gene Sets	R-MMU-1236975	Antigen processing-Cross presentation	-2.41585	-0.625765	19172,19173,26445,26446	Psmb4,Psmb5,Psmb2,Psmb3	4/89
3_Member	Reactome Gene Sets	R-MMU-5607764	CLEC7A (Dectin-1) signaling	-2.39849	-0.614255	19172,19173,26445,26446	Psmb4,Psmb5,Psmb2,Psmb3	4/90
3_Member	Reactome Gene Sets	R-MMU-69052	Switching of origins to a post-replicative state	-2.38135	-0.601452	19172,19173,26445,26446	Psmb4,Psmb5,Psmb2,Psmb3	4/91
3_Member	Reactome Gene Sets	R-MMU-983168	Antigen processing: Ubiquitination & Proteasome degradation	-2.35443	-0.584487	19172,19173,26445,26446,50762,56228,66515	Psmb4,Psmb5,Psmb2,Psmb3,Fbxo6,Ube2j1,Cul7	7/284
3_Member	Reactome Gene Sets	R-MMU-1257604	PIP3 activates AKT signaling	-2.34015	-0.573006	17246,19172,19173,21951,26445,26446	Mdm2,Psmb4,Psmb5,Tnks,Psmb2,Psmb3	6/215
3_Member	Reactome Gene Sets	R-MMU-5668541	TNFR2 non-canonical NF-kB pathway	-2.29881	-0.545411	19172,19173,26445,26446	Psmb4,Psmb5,Psmb2,Psmb3	4/96
3_Member	Reactome Gene Sets	R-MMU-5689603	UCH proteinases	-2.2829	-0.537546	19172,19173,26445,26446	Psmb4,Psmb5,Psmb2,Psmb3	4/97
3_Member	Reactome Gene Sets	R-MMU-69002	DNA Replication Pre-Initiation	-2.26718	-0.524475	19172,19173,26445,26446	Psmb4,Psmb5,Psmb2,Psmb3	4/98
3_Member	Reactome Gene Sets	R-MMU-5683057	MAPK family signaling cascades	-2.25788	-0.520664	19172,19173,22330,23980,26445,26446,69601	Psmb4,Psmb5,Vcl,Pebp1,Psmb2,Psmb3,Dab2ip	7/296
3_Member	WikiPathways	WP519	Proteasome degradation	-2.23545	-0.509568	19172,19173,26445	Psmb4,Psmb5,Psmb2	3/51
3_Member	Reactome Gene Sets	R-MMU-69481	G2/M Checkpoints	-2.2271	-0.502492	19172,19173,22628,26445,26446	Psmb4,Psmb5,Ywhag,Psmb2,Psmb3	5/160
3_Member	Reactome Gene Sets	R-MMU-983705	Signaling by the B Cell Receptor (BCR)	-2.22113	-0.497784	19172,19173,26445,26446	Psmb4,Psmb5,Psmb2,Psmb3	4/101
3_Member	Reactome Gene Sets	R-MMU-202403	TCR signaling	-2.20613	-0.495477	19172,19173,26445,26446	Psmb4,Psmb5,Psmb2,Psmb3	4/102
3_Member	Reactome Gene Sets	R-MMU-9020702	Interleukin-1 signaling	-2.20613	-0.495477	19172,19173,26445,26446	Psmb4,Psmb5,Psmb2,Psmb3	4/102
3_Member	Reactome Gene Sets	R-MMU-5621481	C-type lectin receptors (CLRs)	-2.11964	-0.431447	19172,19173,26445,26446	Psmb4,Psmb5,Psmb2,Psmb3	4/108
3_Member	Reactome Gene Sets	R-MMU-5688426	Deubiquitination	-2.05485	-0.393732	17246,19172,19173,21951,26445,26446	Mdm2,Psmb4,Psmb5,Tnks,Psmb2,Psmb3	6/247
3_Member	Reactome Gene Sets	R-MMU-69239	Synthesis of DNA	-2.00004	-0.360274	19172,19173,26445,26446	Psmb4,Psmb5,Psmb2,Psmb3	4/117
4_Summary	WikiPathways	WP2902	p53 signaling	-5.07283	-2.09168	12028,12443,12450,12578,17246,21825,17390,11972,13544,18746,21826,26427,66290,329278,22628,18148,108911,14870,14873,16952,23980,51810,66515,217718,14042,21951,69601,14733,21859,17319,20336,27280,21849,50762,72612,227622	Bax,Ccnd1,Ccng1,Cdkn2a,Mdm2,Thbs1,Mmp2,Atp6v0d1,Dvl3,Pkm,Thbs2,Creb3l1,Atp6v1g1,Tnn,Ywhag,Npm1,Rcc2,Gstp1,Gsto1,Anxa1,Pebp1,Hnrnpu,Cul7,Nek9,Ext1,Tnks,Dab2ip,Gpc1,Timp3,Mif,Exoc4,Phlda3,Trim28,Fbxo6,Hpf1,Paxx	36/-
4_Member	WikiPathways	WP2902	p53 signaling	-5.07283	-2.09168	12028,12443,12450,12578,17246,21825	Bax,Ccnd1,Ccng1,Cdkn2a,Mdm2,Thbs1	6/67
4_Member	KEGG Pathway	mmu05219	Bladder cancer - Mus musculus (house mouse)	-4.97143	-2.05709	12443,12578,17246,17390,21825	Ccnd1,Cdkn2a,Mdm2,Mmp2,Thbs1	5/41
4_Member	KEGG Pathway	mmu04115	p53 signaling pathway - Mus musculus (house mouse)	-4.82204	-1.97711	12028,12443,12450,12578,17246,21825	Bax,Ccnd1,Ccng1,Cdkn2a,Mdm2,Thbs1	6/74
4_Member	KEGG Pathway	mmu05165	Human papillomavirus infection - Mus musculus (house mouse)	-4.244	-1.58616	11972,12028,12443,13544,17246,18746,21825,21826,26427,66290,329278	Atp6v0d1,Bax,Ccnd1,Dvl3,Mdm2,Pkm,Thbs1,Thbs2,Creb3l1,Atp6v1g1,Tnn	11/359
4_Member	KEGG Pathway	mmu05203	Viral carcinogenesis - Mus musculus (house mouse)	-3.64128	-1.28338	11972,12028,12443,12578,17246,18746,22628,26427	Atp6v0d1,Bax,Ccnd1,Cdkn2a,Mdm2,Pkm,Ywhag,Creb3l1	8/226
4_Member	GO Biological Processes	GO:1902749	regulation of cell cycle G2/M phase transition	-3.62472	-1.2733	12443,12450,12578,18148,26427,108911	Ccnd1,Ccng1,Cdkn2a,Npm1,Creb3l1,Rcc2	6/121
4_Member	KEGG Pathway	mmu01524	Platinum drug resistance - Mus musculus (house mouse)	-3.56246	-1.24808	12028,12578,14870,14873,17246	Bax,Cdkn2a,Gstp1,Gsto1,Mdm2	5/80
4_Member	GO Biological Processes	GO:0033599	regulation of mammary gland epithelial cell proliferation	-3.42686	-1.18398	12028,12443,12578	Bax,Ccnd1,Cdkn2a	3/20
4_Member	KEGG Pathway	mmu01522	Endocrine resistance - Mus musculus (house mouse)	-3.25992	-1.08992	12028,12443,12578,17246,17390	Bax,Ccnd1,Cdkn2a,Mdm2,Mmp2	5/93
4_Member	WikiPathways	WP3654	Novel Jun Dmp1 pathway	-3.13342	-1.02577	12443,12578,17246	Ccnd1,Cdkn2a,Mdm2	3/25
4_Member	GO Biological Processes	GO:0010389	regulation of G2/M transition of mitotic cell cycle	-2.96572	-0.931124	12443,12450,12578,26427,108911	Ccnd1,Ccng1,Cdkn2a,Creb3l1,Rcc2	5/108
4_Member	GO Biological Processes	GO:0007346	regulation of mitotic cell cycle	-2.8981	-0.898715	12443,12450,12578,16952,17246,23980,26427,51810,66515,108911,217718	Ccnd1,Ccng1,Cdkn2a,Anxa1,Mdm2,Pebp1,Creb3l1,Hnrnpu,Cul7,Rcc2,Nek9	11/517
4_Member	GO Biological Processes	GO:1902751	positive regulation of cell cycle G2/M phase transition	-2.81557	-0.845227	12443,18148,108911	Ccnd1,Npm1,Rcc2	3/32
4_Member	KEGG Pathway	mmu05225	Hepatocellular carcinoma - Mus musculus (house mouse)	-2.7955	-0.845227	12028,12443,12578,13544,14870,14873	Bax,Ccnd1,Cdkn2a,Dvl3,Gstp1,Gsto1	6/174
4_Member	GO Biological Processes	GO:1901989	positive regulation of cell cycle phase transition	-2.7785	-0.840821	12443,16952,17246,18148,108911	Ccnd1,Anxa1,Mdm2,Npm1,Rcc2	5/119
4_Member	KEGG Pathway	mmu05218	Melanoma - Mus musculus (house mouse)	-2.75059	-0.827141	12028,12443,12578,17246	Bax,Ccnd1,Cdkn2a,Mdm2	4/72
4_Member	KEGG Pathway	mmu05214	Glioma - Mus musculus (house mouse)	-2.70676	-0.800968	12028,12443,12578,17246	Bax,Ccnd1,Cdkn2a,Mdm2	4/74
4_Member	KEGG Pathway	mmu05220	Chronic myeloid leukemia - Mus musculus (house mouse)	-2.66426	-0.778168	12028,12443,12578,17246	Bax,Ccnd1,Cdkn2a,Mdm2	4/76
4_Member	GO Biological Processes	GO:0044773	mitotic DNA damage checkpoint signaling	-2.56335	-0.716743	12443,12450,17246,26427	Ccnd1,Ccng1,Mdm2,Creb3l1	4/81
4_Member	GO Biological Processes	GO:0048771	tissue remodeling	-2.52584	-0.693185	12028,12578,14042,17246,17390	Bax,Cdkn2a,Ext1,Mdm2,Mmp2	5/136
4_Member	GO Biological Processes	GO:0010564	regulation of cell cycle process	-2.50286	-0.682284	12443,12450,12578,16952,17246,18148,21951,23980,26427,51810,66515,69601,108911	Ccnd1,Ccng1,Cdkn2a,Anxa1,Mdm2,Npm1,Tnks,Pebp1,Creb3l1,Hnrnpu,Cul7,Dab2ip,Rcc2	13/757
4_Member	GO Biological Processes	GO:0044774	mitotic DNA integrity checkpoint signaling	-2.48761	-0.673305	12443,12450,17246,26427	Ccnd1,Ccng1,Mdm2,Creb3l1	4/85
4_Member	KEGG Pathway	mmu05205	Proteoglycans in cancer - Mus musculus (house mouse)	-2.46146	-0.652018	12443,14733,17246,17390,21825,21859	Ccnd1,Gpc1,Mdm2,Mmp2,Thbs1,Timp3	6/203
4_Member	GO Biological Processes	GO:0042770	signal transduction in response to DNA damage	-2.4455	-0.644988	12443,12450,17246,17319,26427	Ccnd1,Ccng1,Mdm2,Mif,Creb3l1	5/142
4_Member	GO Biological Processes	GO:0090068	positive regulation of cell cycle process	-2.43044	-0.631431	12443,16952,17246,18148,23980,51810,108911	Ccnd1,Anxa1,Mdm2,Npm1,Pebp1,Hnrnpu,Rcc2	7/275
4_Member	GO Biological Processes	GO:0051301	cell division	-2.4137	-0.625635	12443,12450,12578,14042,20336,21951,51810,66515,108911,217718	Ccnd1,Ccng1,Cdkn2a,Ext1,Exoc4,Tnks,Hnrnpu,Cul7,Rcc2,Nek9	10/512
4_Member	GO Biological Processes	GO:0010948	negative regulation of cell cycle process	-2.33797	-0.572221	12443,12450,17246,18148,21951,26427,69601	Ccnd1,Ccng1,Mdm2,Npm1,Tnks,Creb3l1,Dab2ip	7/286
4_Member	GO Biological Processes	GO:0072331	signal transduction by p53 class mediator	-2.31491	-0.55522	12028,17246,17319,27280	Bax,Mdm2,Mif,Phlda3	4/95
4_Member	GO Biological Processes	GO:1900087	positive regulation of G1/S transition of mitotic cell cycle	-2.28414	-0.537546	12443,16952,17246	Ccnd1,Anxa1,Mdm2	3/49
4_Member	GO Biological Processes	GO:0045786	negative regulation of cell cycle	-2.25938	-0.520664	12443,12450,12578,17246,18148,21951,26427,69601	Ccnd1,Ccng1,Cdkn2a,Mdm2,Npm1,Tnks,Creb3l1,Dab2ip	8/373
4_Member	GO Biological Processes	GO:1901992	positive regulation of mitotic cell cycle phase transition	-2.25165	-0.520664	12443,16952,17246,108911	Ccnd1,Anxa1,Mdm2,Rcc2	4/99
4_Member	KEGG Pathway	mmu05215	Prostate cancer - Mus musculus (house mouse)	-2.25165	-0.520664	12443,14870,17246,26427	Ccnd1,Gstp1,Mdm2,Creb3l1	4/99
4_Member	GO Biological Processes	GO:0001974	blood vessel remodeling	-2.23545	-0.509568	12028,14042,17246	Bax,Ext1,Mdm2	3/51
4_Member	KEGG Pathway	mmu05206	MicroRNAs in cancer - Mus musculus (house mouse)	-2.20393	-0.495477	12443,12450,12578,17246,21825,21859,329278	Ccnd1,Ccng1,Cdkn2a,Mdm2,Thbs1,Timp3,Tnn	7/303
4_Member	GO Biological Processes	GO:0006974	DNA damage response	-2.09702	-0.414606	12028,12443,12450,17246,17319,18148,21849,26427,27280,50762,72612,227622	Bax,Ccnd1,Ccng1,Mdm2,Mif,Npm1,Trim28,Creb3l1,Phlda3,Fbxo6,Hpf1,Paxx	12/753
4_Member	GO Biological Processes	GO:0000077	DNA damage checkpoint signaling	-2.06508	-0.395122	12443,12450,17246,26427	Ccnd1,Ccng1,Mdm2,Creb3l1	4/112
4_Member	WikiPathways	WP413	G1 to S cell cycle control	-2.04001	-0.388636	12443,12578,17246	Ccnd1,Cdkn2a,Mdm2	3/60
5_Summary	GO Biological Processes	GO:0060485	mesenchyme development	-4.95526	-2.05709	13837,14042,16950,17246,20319,20336,21825,21849,21859,66515	Epha3,Ext1,Loxl3,Mdm2,Sfrp2,Exoc4,Thbs1,Trim28,Timp3,Cul7	10/-
5_Member	GO Biological Processes	GO:0060485	mesenchyme development	-4.95526	-2.05709	13837,14042,16950,17246,20319,20336,21825,21849,21859,66515	Epha3,Ext1,Loxl3,Mdm2,Sfrp2,Exoc4,Thbs1,Trim28,Timp3,Cul7	10/245
5_Member	GO Biological Processes	GO:0048762	mesenchymal cell differentiation	-2.02709	-0.378909	14042,16950,21849,21859,66515	Ext1,Loxl3,Trim28,Timp3,Cul7	5/179
6_Summary	GO Biological Processes	GO:0050680	negative regulation of epithelial cell proliferation	-4.52125	-1.75271	11946,11983,12578,14595,18148,20319,21825,69601,12028,14694,14870,23980,51810,110355,20568,21859,23825,108911,56693,66914,12443,12450,17319,22368,227737,329278,21951,72612	Atp5f1a,Atp5if1,Cdkn2a,B4galt1,Npm1,Sfrp2,Thbs1,Dab2ip,Bax,Rack1,Gstp1,Pebp1,Hnrnpu,Grk2,Slpi,Timp3,Banf1,Rcc2,Crtap,Vps28,Ccnd1,Ccng1,Mif,Trpv2,Niban2,Tnn,Tnks,Hpf1	28/-
6_Member	GO Biological Processes	GO:0050680	negative regulation of epithelial cell proliferation	-4.52125	-1.75271	11946,11983,12578,14595,18148,20319,21825,69601	Atp5f1a,Atp5if1,Cdkn2a,B4galt1,Npm1,Sfrp2,Thbs1,Dab2ip	8/169
6_Member	GO Biological Processes	GO:0042326	negative regulation of phosphorylation	-3.66846	-1.29505	12028,12578,14694,14870,18148,20319,23980,51810,69601,110355	Bax,Cdkn2a,Rack1,Gstp1,Npm1,Sfrp2,Pebp1,Hnrnpu,Dab2ip,Grk2	10/349
6_Member	GO Biological Processes	GO:0043086	negative regulation of catalytic activity	-3.44546	-1.18398	11983,12578,14870,18148,20319,20568,21825,21859,23825,23980,51810,69601,108911	Atp5if1,Cdkn2a,Gstp1,Npm1,Sfrp2,Slpi,Thbs1,Timp3,Banf1,Pebp1,Hnrnpu,Dab2ip,Rcc2	13/595
6_Member	GO Biological Processes	GO:0031400	negative regulation of protein modification process	-3.36726	-1.14478	12028,12578,14694,14870,18148,20319,23980,56693,66914,69601,110355	Bax,Cdkn2a,Rack1,Gstp1,Npm1,Sfrp2,Pebp1,Crtap,Vps28,Dab2ip,Grk2	11/453
6_Member	GO Biological Processes	GO:0001933	negative regulation of protein phosphorylation	-3.23566	-1.07267	12028,12578,14694,14870,18148,20319,23980,69601,110355	Bax,Cdkn2a,Rack1,Gstp1,Npm1,Sfrp2,Pebp1,Dab2ip,Grk2	9/326
6_Member	GO Biological Processes	GO:0010563	negative regulation of phosphorus metabolic process	-3.04909	-0.97535	12028,12578,14694,14870,18148,20319,23980,51810,69601,110355	Bax,Cdkn2a,Rack1,Gstp1,Npm1,Sfrp2,Pebp1,Hnrnpu,Dab2ip,Grk2	10/419
6_Member	GO Biological Processes	GO:0045936	negative regulation of phosphate metabolic process	-3.04909	-0.97535	12028,12578,14694,14870,18148,20319,23980,51810,69601,110355	Bax,Cdkn2a,Rack1,Gstp1,Npm1,Sfrp2,Pebp1,Hnrnpu,Dab2ip,Grk2	10/419
6_Member	GO Biological Processes	GO:0050678	regulation of epithelial cell proliferation	-2.99473	-0.949027	11946,11983,12028,12443,12578,14595,18148,20319,21825,69601	Atp5f1a,Atp5if1,Bax,Ccnd1,Cdkn2a,B4galt1,Npm1,Sfrp2,Thbs1,Dab2ip	10/426
6_Member	GO Biological Processes	GO:0071900	regulation of protein serine/threonine kinase activity	-2.89113	-0.898715	12443,12450,12578,14870,17319,20319,21825,69601	Ccnd1,Ccng1,Cdkn2a,Gstp1,Mif,Sfrp2,Thbs1,Dab2ip	8/294
6_Member	GO Biological Processes	GO:0008285	negative regulation of cell population proliferation	-2.85744	-0.872606	11946,11983,12028,12578,14595,14870,18148,20319,21825,21859,22368,69601,227737,329278	Atp5f1a,Atp5if1,Bax,Cdkn2a,B4galt1,Gstp1,Npm1,Sfrp2,Thbs1,Timp3,Trpv2,Dab2ip,Niban2,Tnn	14/776
6_Member	GO Biological Processes	GO:0051348	negative regulation of transferase activity	-2.83295	-0.85408	12578,14870,18148,20319,23825,51810,69601	Cdkn2a,Gstp1,Npm1,Sfrp2,Banf1,Hnrnpu,Dab2ip	7/233
6_Member	GO Biological Processes	GO:0051338	regulation of transferase activity	-2.78664	-0.840821	12443,12450,12578,14870,17319,18148,20319,21825,21951,23825,51810,69601,72612	Ccnd1,Ccng1,Cdkn2a,Gstp1,Mif,Npm1,Sfrp2,Thbs1,Tnks,Banf1,Hnrnpu,Dab2ip,Hpf1	13/702
6_Member	GO Biological Processes	GO:0048145	regulation of fibroblast proliferation	-2.65463	-0.774933	12028,14870,17319,69601,110355	Bax,Gstp1,Mif,Dab2ip,Grk2	5/127
6_Member	GO Biological Processes	GO:0051346	negative regulation of hydrolase activity	-2.5864	-0.73304	11983,20319,20568,21825,21859,23980,69601,108911	Atp5if1,Sfrp2,Slpi,Thbs1,Timp3,Pebp1,Dab2ip,Rcc2	8/329
6_Member	GO Biological Processes	GO:0033673	negative regulation of kinase activity	-2.5039	-0.682284	12578,14870,18148,20319,51810,69601	Cdkn2a,Gstp1,Npm1,Sfrp2,Hnrnpu,Dab2ip	6/199
6_Member	GO Biological Processes	GO:0048147	negative regulation of fibroblast proliferation	-2.36148	-0.590121	12028,14870,69601	Bax,Gstp1,Dab2ip	3/46
6_Member	GO Biological Processes	GO:0071901	negative regulation of protein serine/threonine kinase activity	-2.25165	-0.520664	12578,14870,20319,69601	Cdkn2a,Gstp1,Sfrp2,Dab2ip	4/99
6_Member	GO Biological Processes	GO:0043407	negative regulation of MAP kinase activity	-2.16627	-0.466273	14870,20319,69601	Gstp1,Sfrp2,Dab2ip	3/54
6_Member	GO Biological Processes	GO:0043405	regulation of MAP kinase activity	-2.13947	-0.44777	14870,17319,20319,21825,69601	Gstp1,Mif,Sfrp2,Thbs1,Dab2ip	5/168
6_Member	GO Biological Processes	GO:0050922	negative regulation of chemotaxis	-2.08046	-0.401793	14870,17319,21825	Gstp1,Mif,Thbs1	3/58
7_Summary	GO Biological Processes	GO:0010812	negative regulation of cell-substrate adhesion	-4.12163	-1.50517	12578,16852,21825,50706,108911,14870,16950,16952,17390,140570,12837,13837,22330	Cdkn2a,Lgals1,Thbs1,Postn,Rcc2,Gstp1,Loxl3,Anxa1,Mmp2,Plxnb2,Col8a1,Epha3,Vcl	13/-
7_Member	GO Biological Processes	GO:0010812	negative regulation of cell-substrate adhesion	-4.12163	-1.50517	12578,16852,21825,50706,108911	Cdkn2a,Lgals1,Thbs1,Postn,Rcc2	5/61
7_Member	GO Biological Processes	GO:0001953	negative regulation of cell-matrix adhesion	-3.85898	-1.40525	12578,21825,50706,108911	Cdkn2a,Thbs1,Postn,Rcc2	4/37
7_Member	GO Biological Processes	GO:0007162	negative regulation of cell adhesion	-3.7392	-1.33158	12578,14870,16852,16950,16952,17390,21825,50706,108911,140570	Cdkn2a,Gstp1,Lgals1,Loxl3,Anxa1,Mmp2,Thbs1,Postn,Rcc2,Plxnb2	10/342
7_Member	GO Biological Processes	GO:0010810	regulation of cell-substrate adhesion	-3.58977	-1.25414	12578,12837,13837,16852,21825,22330,50706,108911	Cdkn2a,Col8a1,Epha3,Lgals1,Thbs1,Vcl,Postn,Rcc2	8/230
7_Member	GO Biological Processes	GO:0001952	regulation of cell-matrix adhesion	-3.45677	-1.18398	12578,13837,21825,22330,50706,108911	Cdkn2a,Epha3,Thbs1,Vcl,Postn,Rcc2	6/130
8_Summary	GO Biological Processes	GO:0031647	regulation of protein stability	-3.99639	-1.46157	12465,12578,13135,13544,17246,18148,56693,66868,216344,378702,59050,109075,140546,17319,20826,19285,67204,68011,100608	Cct5,Cdkn2a,Dad1,Dvl3,Mdm2,Npm1,Crtap,Mfsd1,Rab21,Serf2,Nsa2,Exosc4,Eri3,Mif,Snu13,Cavin1,Eif2s2,Snrpg,Noc4l	19/-
8_Member	GO Biological Processes	GO:0031647	regulation of protein stability	-3.99639	-1.46157	12465,12578,13135,13544,17246,18148,56693,66868,216344,378702	Cct5,Cdkn2a,Dad1,Dvl3,Mdm2,Npm1,Crtap,Mfsd1,Rab21,Serf2	10/318
8_Member	GO Biological Processes	GO:0000460	maturation of 5.8S rRNA	-3.95499	-1.45097	18148,59050,109075,140546	Npm1,Nsa2,Exosc4,Eri3	4/35
8_Member	GO Biological Processes	GO:0043516	regulation of DNA damage response, signal transduction by p53 class mediator	-3.85898	-1.40525	12578,17246,17319,18148	Cdkn2a,Mdm2,Mif,Npm1	4/37
8_Member	GO Biological Processes	GO:0050821	protein stabilization	-3.16832	-1.03552	12465,12578,13544,18148,56693,66868,216344	Cct5,Cdkn2a,Dvl3,Npm1,Crtap,Mfsd1,Rab21	7/204
8_Member	GO Biological Processes	GO:0031648	protein destabilization	-3.13034	-1.02577	12578,17246,18148,378702	Cdkn2a,Mdm2,Npm1,Serf2	4/57
8_Member	GO Biological Processes	GO:0000470	maturation of LSU-rRNA	-2.89798	-0.898715	18148,20826,59050	Npm1,Snu13,Nsa2	3/30
8_Member	GO Biological Processes	GO:0009303	rRNA transcription	-2.89798	-0.898715	12578,18148,19285	Cdkn2a,Npm1,Cavin1	3/30
8_Member	GO Biological Processes	GO:0016072	rRNA metabolic process	-2.72917	-0.814954	12578,18148,19285,20826,59050,109075,140546	Cdkn2a,Npm1,Cavin1,Snu13,Nsa2,Exosc4,Eri3	7/243
8_Member	GO Biological Processes	GO:1901796	regulation of signal transduction by p53 class mediator	-2.46931	-0.656561	12578,17246,17319,18148	Cdkn2a,Mdm2,Mif,Npm1	4/86
8_Member	GO Biological Processes	GO:0022613	ribonucleoprotein complex biogenesis	-2.41278	-0.625635	12578,18148,20826,59050,67204,68011,100608,109075,140546	Cdkn2a,Npm1,Snu13,Nsa2,Eif2s2,Snrpg,Noc4l,Exosc4,Eri3	9/430
8_Member	GO Biological Processes	GO:0006364	rRNA processing	-2.39971	-0.614255	12578,18148,20826,59050,109075,140546	Cdkn2a,Npm1,Snu13,Nsa2,Exosc4,Eri3	6/209
8_Member	GO Biological Processes	GO:0090398	cellular senescence	-2.21189	-0.495477	12578,17319,18148	Cdkn2a,Mif,Npm1	3/52
8_Member	GO Biological Processes	GO:0042254	ribosome biogenesis	-2.15162	-0.455198	12578,18148,20826,59050,100608,109075,140546	Cdkn2a,Npm1,Snu13,Nsa2,Noc4l,Exosc4,Eri3	7/310
8_Member	GO Biological Processes	GO:0098781	ncRNA transcription	-2.14416	-0.451286	12578,18148,19285	Cdkn2a,Npm1,Cavin1	3/55
9_Summary	GO Biological Processes	GO:0090288	negative regulation of cellular response to growth factor stimulus	-3.91684	-1.43508	14733,20319,21825,26427,69601,239337,18746,329278,12443,50762,12028,56228,16948,17913,21826	Gpc1,Sfrp2,Thbs1,Creb3l1,Dab2ip,Adamts12,Pkm,Tnn,Ccnd1,Fbxo6,Bax,Ube2j1,Lox,Myo1c,Thbs2	15/-
9_Member	GO Biological Processes	GO:0090288	negative regulation of cellular response to growth factor stimulus	-3.91684	-1.43508	14733,20319,21825,26427,69601,239337	Gpc1,Sfrp2,Thbs1,Creb3l1,Dab2ip,Adamts12	6/107
9_Member	GO Biological Processes	GO:1903670	regulation of sprouting angiogenesis	-3.56294	-1.24808	18746,21825,26427,329278	Pkm,Thbs1,Creb3l1,Tnn	4/44
9_Member	GO Biological Processes	GO:0040037	negative regulation of fibroblast growth factor receptor signaling pathway	-3.42686	-1.18398	14733,21825,26427	Gpc1,Thbs1,Creb3l1	3/20
9_Member	GO Biological Processes	GO:0006986	response to unfolded protein	-3.17642	-1.03709	12443,21825,26427,50762,69601	Ccnd1,Thbs1,Creb3l1,Fbxo6,Dab2ip	5/97
9_Member	GO Biological Processes	GO:0034976	response to endoplasmic reticulum stress	-2.95375	-0.924117	12028,12443,21825,26427,50762,56228,69601	Bax,Ccnd1,Thbs1,Creb3l1,Fbxo6,Ube2j1,Dab2ip	7/222
9_Member	GO Biological Processes	GO:0035966	response to topologically incorrect protein	-2.87799	-0.889931	12443,21825,26427,50762,69601	Ccnd1,Thbs1,Creb3l1,Fbxo6,Dab2ip	5/113
9_Member	GO Biological Processes	GO:0040036	regulation of fibroblast growth factor receptor signaling pathway	-2.70194	-0.799009	14733,21825,26427	Gpc1,Thbs1,Creb3l1	3/35
9_Member	GO Biological Processes	GO:0090287	regulation of cellular response to growth factor stimulus	-2.60265	-0.741731	14733,16948,17913,20319,21825,26427,69601,239337	Gpc1,Lox,Myo1c,Sfrp2,Thbs1,Creb3l1,Dab2ip,Adamts12	8/327
9_Member	GO Biological Processes	GO:0045765	regulation of angiogenesis	-2.15162	-0.455198	18746,20319,21825,21826,26427,69601,329278	Pkm,Sfrp2,Thbs1,Thbs2,Creb3l1,Dab2ip,Tnn	7/310
9_Member	GO Biological Processes	GO:1901342	regulation of vasculature development	-2.10088	-0.417318	18746,20319,21825,21826,26427,69601,329278	Pkm,Sfrp2,Thbs1,Thbs2,Creb3l1,Dab2ip,Tnn	7/317
9_Member	GO Biological Processes	GO:0016525	negative regulation of angiogenesis	-2.06508	-0.395122	21825,21826,26427,69601	Thbs1,Thbs2,Creb3l1,Dab2ip	4/112
9_Member	GO Biological Processes	GO:2000181	negative regulation of blood vessel morphogenesis	-2.03866	-0.388345	21825,21826,26427,69601	Thbs1,Thbs2,Creb3l1,Dab2ip	4/114
9_Member	GO Biological Processes	GO:1901343	negative regulation of vasculature development	-2.02565	-0.37853	21825,21826,26427,69601	Thbs1,Thbs2,Creb3l1,Dab2ip	4/115
10_Summary	GO Biological Processes	GO:0070201	regulation of establishment of protein localization	-3.83528	-1.39498	11983,12465,12578,14694,16341,16952,17246,17913,20336,21849,56228,66914,68151,76983,13837,18148,216344	Atp5if1,Cct5,Cdkn2a,Rack1,Eif3e,Anxa1,Mdm2,Myo1c,Exoc4,Trim28,Ube2j1,Vps28,Wls,Scfd1,Epha3,Npm1,Rab21	17/-
10_Member	GO Biological Processes	GO:0070201	regulation of establishment of protein localization	-3.83528	-1.39498	11983,12465,12578,14694,16341,16952,17246,17913,20336,21849,56228,66914,68151,76983	Atp5if1,Cct5,Cdkn2a,Rack1,Eif3e,Anxa1,Mdm2,Myo1c,Exoc4,Trim28,Ube2j1,Vps28,Wls,Scfd1	14/618
10_Member	GO Biological Processes	GO:0051223	regulation of protein transport	-2.77408	-0.840511	12578,14694,16341,16952,17246,20336,21849,56228,66914,68151,76983	Cdkn2a,Rack1,Eif3e,Anxa1,Mdm2,Exoc4,Trim28,Ube2j1,Vps28,Wls,Scfd1	11/536
10_Member	GO Biological Processes	GO:1903829	positive regulation of protein localization	-2.75506	-0.829578	12465,12578,13837,14694,16341,17246,17913,18148,21849,66914,68151	Cct5,Cdkn2a,Epha3,Rack1,Eif3e,Mdm2,Myo1c,Npm1,Trim28,Vps28,Wls	11/539
10_Member	GO Biological Processes	GO:1904951	positive regulation of establishment of protein localization	-2.32187	-0.558892	12465,14694,16341,17246,17913,21849,66914,68151	Cct5,Rack1,Eif3e,Mdm2,Myo1c,Trim28,Vps28,Wls	8/364
10_Member	GO Biological Processes	GO:0032386	regulation of intracellular transport	-2.28153	-0.537499	12578,16341,17246,21849,56228,76983,216344	Cdkn2a,Eif3e,Mdm2,Trim28,Ube2j1,Scfd1,Rab21	7/293
10_Member	GO Biological Processes	GO:0033157	regulation of intracellular protein transport	-2.04687	-0.388636	12578,16341,17246,21849,56228	Cdkn2a,Eif3e,Mdm2,Trim28,Ube2j1	5/177
11_Summary	GO Biological Processes	GO:0018193	peptidyl-amino acid modification	-3.69097	-1.31188	12028,13837,16019,16948,16950,21849,21951,22022,27973,56693,66617,70316,110355	Bax,Epha3,Ighm,Lox,Loxl3,Trim28,Tnks,Tpst2,Vkorc1,Crtap,Ntmt1,Ndufab1,Grk2	13/-
11_Member	GO Biological Processes	GO:0018193	peptidyl-amino acid modification	-3.69097	-1.31188	12028,13837,16019,16948,16950,21849,21951,22022,27973,56693,66617,70316,110355	Bax,Epha3,Ighm,Lox,Loxl3,Trim28,Tnks,Tpst2,Vkorc1,Crtap,Ntmt1,Ndufab1,Grk2	13/561
11_Member	GO Biological Processes	GO:0018205	peptidyl-lysine modification	-2.0785	-0.401793	16948,16950,21849,70316	Lox,Loxl3,Trim28,Ndufab1	4/111
12_Summary	GO Biological Processes	GO:0034250	positive regulation of amide metabolic process	-3.66	-1.29219	14694,16341,18148,18746,21825,51810,140570	Rack1,Eif3e,Npm1,Pkm,Thbs1,Hnrnpu,Plxnb2	7/-
12_Member	GO Biological Processes	GO:0034250	positive regulation of amide metabolic process	-3.66	-1.29219	14694,16341,18148,18746,21825,51810,140570	Rack1,Eif3e,Npm1,Pkm,Thbs1,Hnrnpu,Plxnb2	7/169
12_Member	GO Biological Processes	GO:0045727	positive regulation of translation	-3.3692	-1.14478	16341,18148,18746,21825,51810,140570	Eif3e,Npm1,Pkm,Thbs1,Hnrnpu,Plxnb2	6/135
13_Summary	GO Biological Processes	GO:1904705	regulation of vascular associated smooth muscle cell proliferation	-3.64019	-1.28338	14870,17246,17390,21859,110355,12831,13544,13837,14042,16948,20319,21825,51810,56376	Gstp1,Mdm2,Mmp2,Timp3,Grk2,Col5a1,Dvl3,Epha3,Ext1,Lox,Sfrp2,Thbs1,Hnrnpu,Pdlim5	14/-
13_Member	GO Biological Processes	GO:1904705	regulation of vascular associated smooth muscle cell proliferation	-3.64019	-1.28338	14870,17246,17390,21859,110355	Gstp1,Mdm2,Mmp2,Timp3,Grk2	5/77
13_Member	GO Biological Processes	GO:0007507	heart development	-2.79666	-0.845227	12831,13544,13837,14042,16948,17246,17390,20319,21825,51810,56376,110355	Col5a1,Dvl3,Epha3,Ext1,Lox,Mdm2,Mmp2,Sfrp2,Thbs1,Hnrnpu,Pdlim5,Grk2	12/615
13_Member	GO Biological Processes	GO:0048660	regulation of smooth muscle cell proliferation	-2.55848	-0.715266	14870,17246,17390,21825,21859,110355	Gstp1,Mdm2,Mmp2,Thbs1,Timp3,Grk2	6/194
13_Member	GO Biological Processes	GO:1904707	positive regulation of vascular associated smooth muscle cell proliferation	-2.41621	-0.625765	17246,17390,110355	Mdm2,Mmp2,Grk2	3/44
13_Member	GO Biological Processes	GO:0003197	endocardial cushion development	-2.23545	-0.509568	13837,17246,21825	Epha3,Mdm2,Thbs1	3/51
13_Member	GO Biological Processes	GO:0048661	positive regulation of smooth muscle cell proliferation	-2.00004	-0.360274	17246,17390,21825,110355	Mdm2,Mmp2,Thbs1,Grk2	4/117
14_Summary	Reactome Gene Sets	R-MMU-9837999	Mitochondrial protein degradation	-3.61391	-1.26782	11655,11946,15526,17991,66865,11983,12028,16952	Alas1,Atp5f1a,Hspa9,Ndufa2,Pmpca,Atp5if1,Bax,Anxa1	8/-
14_Member	Reactome Gene Sets	R-MMU-9837999	Mitochondrial protein degradation	-3.61391	-1.26782	11655,11946,15526,17991,66865	Alas1,Atp5f1a,Hspa9,Ndufa2,Pmpca	5/78
14_Member	GO Biological Processes	GO:0002262	myeloid cell homeostasis	-2.04687	-0.388636	11655,11983,12028,15526,16952	Alas1,Atp5if1,Bax,Hspa9,Anxa1	5/177
15_Summary	GO Biological Processes	GO:2001233	regulation of apoptotic signaling pathway	-3.5072	-1.21003	11739,12028,14694,14870,17246,17319,17390,20319,21825,26427,69601,16948,22628,23980,27280	Slc25a4,Bax,Rack1,Gstp1,Mdm2,Mif,Mmp2,Sfrp2,Thbs1,Creb3l1,Dab2ip,Lox,Ywhag,Pebp1,Phlda3	15/-
15_Member	GO Biological Processes	GO:2001233	regulation of apoptotic signaling pathway	-3.5072	-1.21003	11739,12028,14694,14870,17246,17319,17390,20319,21825,26427,69601	Slc25a4,Bax,Rack1,Gstp1,Mdm2,Mif,Mmp2,Sfrp2,Thbs1,Creb3l1,Dab2ip	11/436
15_Member	GO Biological Processes	GO:2001234	negative regulation of apoptotic signaling pathway	-3.31347	-1.11573	11739,12028,14694,14870,17246,17319,20319,26427	Slc25a4,Bax,Rack1,Gstp1,Mdm2,Mif,Sfrp2,Creb3l1	8/253
15_Member	GO Biological Processes	GO:1902532	negative regulation of intracellular signal transduction	-3.01235	-0.954516	14694,14870,16948,17246,17319,20319,21825,22628,23980,26427,27280,69601	Rack1,Gstp1,Lox,Mdm2,Mif,Sfrp2,Thbs1,Ywhag,Pebp1,Creb3l1,Phlda3,Dab2ip	12/580
15_Member	GO Biological Processes	GO:2001242	regulation of intrinsic apoptotic signaling pathway	-2.55848	-0.715266	12028,14694,17246,17319,17390,26427	Bax,Rack1,Mdm2,Mif,Mmp2,Creb3l1	6/194
15_Member	GO Biological Processes	GO:2001243	negative regulation of intrinsic apoptotic signaling pathway	-2.09207	-0.4108	14694,17246,17319,26427	Rack1,Mdm2,Mif,Creb3l1	4/110
16_Summary	GO Biological Processes	GO:0010975	regulation of neuron projection development	-3.50145	-1.21003	13837,16852,17246,20319,22368,56376,66515,68151,69601,84035,140570,216344,329278,13544,16019,16952,67220,108911,14694,17925,214137	Epha3,Lgals1,Mdm2,Sfrp2,Trpv2,Pdlim5,Cul7,Wls,Dab2ip,Kremen1,Plxnb2,Rab21,Tnn,Dvl3,Ighm,Anxa1,Plekho1,Rcc2,Rack1,Myo9b,Arhgap29	21/-
16_Member	GO Biological Processes	GO:0010975	regulation of neuron projection development	-3.50145	-1.21003	13837,16852,17246,20319,22368,56376,66515,68151,69601,84035,140570,216344,329278	Epha3,Lgals1,Mdm2,Sfrp2,Trpv2,Pdlim5,Cul7,Wls,Dab2ip,Kremen1,Plxnb2,Rab21,Tnn	13/587
16_Member	GO Biological Processes	GO:0022604	regulation of cell morphogenesis	-3.06675	-0.980029	13544,16019,16952,66515,67220,68151,140570,216344	Dvl3,Ighm,Anxa1,Cul7,Plekho1,Wls,Plxnb2,Rab21	8/276
16_Member	GO Biological Processes	GO:0120035	regulation of plasma membrane bounded cell projection organization	-2.80033	-0.845227	13837,16852,17246,20319,22368,56376,66515,68151,69601,84035,108911,140570,216344,329278	Epha3,Lgals1,Mdm2,Sfrp2,Trpv2,Pdlim5,Cul7,Wls,Dab2ip,Kremen1,Rcc2,Plxnb2,Rab21,Tnn	14/787
16_Member	GO Biological Processes	GO:0043087	regulation of GTPase activity	-2.75503	-0.829578	13544,13837,14694,17925,69601,108911,140570,214137	Dvl3,Epha3,Rack1,Myo9b,Dab2ip,Rcc2,Plxnb2,Arhgap29	8/309
16_Member	GO Biological Processes	GO:0031346	positive regulation of cell projection organization	-2.18333	-0.477311	13544,13837,22368,66515,68151,69601,140570,216344,329278	Dvl3,Epha3,Trpv2,Cul7,Wls,Dab2ip,Plxnb2,Rab21,Tnn	9/467
16_Member	GO Biological Processes	GO:2001222	regulation of neuron migration	-2.08046	-0.401793	69601,140570,329278	Dab2ip,Plxnb2,Tnn	3/58
17_Summary	GO Biological Processes	GO:0009110	vitamin biosynthetic process	-3.42686	-1.18398	14873,27973,116914,14042,14733,14870,22022,320878	Gsto1,Vkorc1,Slc19a2,Ext1,Gpc1,Gstp1,Tpst2,Mical2	8/-
17_Member	GO Biological Processes	GO:0009110	vitamin biosynthetic process	-3.42686	-1.18398	14873,27973,116914	Gsto1,Vkorc1,Slc19a2	3/20
17_Member	GO Biological Processes	GO:0006790	sulfur compound metabolic process	-2.17384	-0.471667	14042,14733,14870,14873,22022,116914,320878	Ext1,Gpc1,Gstp1,Gsto1,Tpst2,Slc19a2,Mical2	7/307
18_Summary	GO Biological Processes	GO:0006892	post-Golgi vesicle-mediated transport	-3.32529	-1.11573	11776,20336,53611,74105,76983,17913,22628,56495,66525,66865,11739,11983,12028,12831,21825,22022,23825	Ap3d1,Exoc4,Vti1a,Gga2,Scfd1,Myo1c,Ywhag,Get3,Timm50,Pmpca,Slc25a4,Atp5if1,Bax,Col5a1,Thbs1,Tpst2,Banf1	17/-
18_Member	GO Biological Processes	GO:0006892	post-Golgi vesicle-mediated transport	-3.32529	-1.11573	11776,20336,53611,74105,76983	Ap3d1,Exoc4,Vti1a,Gga2,Scfd1	5/90
18_Member	GO Biological Processes	GO:0006605	protein targeting	-2.79078	-0.842627	11776,17913,20336,22628,56495,66525,66865	Ap3d1,Myo1c,Exoc4,Ywhag,Get3,Timm50,Pmpca	7/237
18_Member	GO Biological Processes	GO:0061024	membrane organization	-2.37004	-0.596372	11739,11776,11983,12028,12831,20336,21825,22022,23825,53611,56495,66525	Slc25a4,Ap3d1,Atp5if1,Bax,Col5a1,Exoc4,Thbs1,Tpst2,Banf1,Vti1a,Get3,Timm50	12/694
19_Summary	GO Biological Processes	GO:0051881	regulation of mitochondrial membrane potential	-3.25992	-1.08992	11983,12028,12578,14694,93686,110355,16341,16948,20568,21849,21951,227737,17319,20319,17390,22330,21825,69601	Atp5if1,Bax,Cdkn2a,Rack1,Rbfox2,Grk2,Eif3e,Lox,Slpi,Trim28,Tnks,Niban2,Mif,Sfrp2,Mmp2,Vcl,Thbs1,Dab2ip	18/-
19_Member	GO Biological Processes	GO:0051881	regulation of mitochondrial membrane potential	-3.25992	-1.08992	11983,12028,12578,14694,93686	Atp5if1,Bax,Cdkn2a,Rack1,Rbfox2	5/93
19_Member	GO Biological Processes	GO:0033137	negative regulation of peptidyl-serine phosphorylation	-2.94147	-0.924117	12028,14694,110355	Bax,Rack1,Grk2	3/29
19_Member	GO Biological Processes	GO:0051098	regulation of binding	-2.92374	-0.914254	12028,12578,14694,16341,16948,20568,21849,21951,227737	Bax,Cdkn2a,Rack1,Eif3e,Lox,Slpi,Trim28,Tnks,Niban2	9/361
19_Member	GO Biological Processes	GO:0032091	negative regulation of protein binding	-2.48761	-0.673305	12028,12578,14694,20568	Bax,Cdkn2a,Rack1,Slpi	4/85
19_Member	GO Biological Processes	GO:0033135	regulation of peptidyl-serine phosphorylation	-2.36914	-0.596372	12028,14694,17319,20319,110355	Bax,Rack1,Mif,Sfrp2,Grk2	5/148
19_Member	GO Biological Processes	GO:0051100	negative regulation of binding	-2.28465	-0.537546	12028,12578,14694,20568,21951	Bax,Cdkn2a,Rack1,Slpi,Tnks	5/155
19_Member	WikiPathways	WP373	IL 3 signaling pathway	-2.25165	-0.520664	12028,14694,17390,22330	Bax,Rack1,Mmp2,Vcl	4/99
19_Member	GO Biological Processes	GO:2001235	positive regulation of apoptotic signaling pathway	-2.05687	-0.393732	12028,14694,17390,21825,69601	Bax,Rack1,Mmp2,Thbs1,Dab2ip	5/176
20_Summary	GO Biological Processes	GO:1905517	macrophage migration	-3.18666	-1.04402	14595,17390,17925,14042,14537,16952	B4galt1,Mmp2,Myo9b,Ext1,Gcnt1,Anxa1	6/-
20_Member	GO Biological Processes	GO:1905517	macrophage migration	-3.18666	-1.04402	14595,17390,17925	B4galt1,Mmp2,Myo9b	3/24
20_Member	GO Biological Processes	GO:0050900	leukocyte migration	-2.05485	-0.393732	14042,14537,14595,16952,17390,17925	Ext1,Gcnt1,B4galt1,Anxa1,Mmp2,Myo9b	6/247
