# Supplementary material for: Micropillar-induced changes in cell nucleus morphology enhance bone regeneration by modulating the secretome
Source: Research Square preprint supplement (doi:10.21203/rs.3.rs-5530535/v1), 2025-01-06
Supplement: Supplementary file 3 [file dab692b8f3a58799f34a27a3.xlsx]

## Sheet: Annotation upregulation
MyList	Gene ID	Type	Tax ID	Homologene Gene ID	Homologene Gene Tax ID	Gene Symbol	Description	Biological Process (GO)	Kinase Class (UniProt)	GO:1901137 carbohydrate derivative biosyn	GO:0048284 organelle fusion	GO:0071692 protein localization to extrac	R-MMU-2243919 Crosslinking of collagen fibri	R-MMU-432722 Golgi Associated Vesicle Bioge	GO:0006334 nucleosome assembly	GO:0070972 protein localization to endopl	GO:0043500 muscle adaptation	GO:0030183 B cell differentiation	GO:0051881 regulation of mitochondrial me	GO:0006397 mRNA processing	mmu04141 Protein processing in endoplas	GO:0050922 negative regulation of chemota	GO:0001952 regulation of cell-matrix adhe	mmu01232 Nucleotide metabolism - Mus mu	GO:0042147 retrograde transport, endosome	GO:0060322 head development	GO:0006661 phosphatidylinositol biosynthe
Col1a2	12843	symbol	M. musculus	12843	M. musculus	Col1a2	collagen, type I, alpha 2	GO:0070208 protein heterotrimerization;GO:0043589 skin morphogenesis;GO:0070206 protein trimerization		1	0	0	1	0	0	0	0	0	0	0	0	0	0	0	0	0	0
Comp	12845	symbol	M. musculus	12845	M. musculus	Comp	cartilage oligomeric matrix protein	GO:1990079 cartilage homeostasis;GO:0035989 tendon development;GO:1902732 positive regulation of chondrocyte proliferation		0	0	1	1	0	0	0	0	0	0	0	0	0	0	0	0	0	0
Crispld2	78892	symbol	M. musculus	78892	M. musculus	Crispld2	cysteine-rich secretory protein LCCL domain containing 2	GO:0060325 face morphogenesis;GO:0060323 head morphogenesis;GO:0010171 body morphogenesis		0	1	0	1	0	0	0	0	0	0	0	0	0	0	0	0	1	0
Fmod	14264	symbol	M. musculus	14264	M. musculus	Fmod	fibromodulin			0	0	0	0	0	0	0	0	0	0	0	0	0	0	0	0	0	0
Ighj1	777648	symbol	M. musculus	777648	M. musculus	Ighj1	immunoglobulin heavy joining 1			0	0	0	0	0	0	0	0	0	0	0	0	0	0	0	0	0	0
Nbl1	17965	symbol	M. musculus	17965	M. musculus	Nbl1	NBL1, DAN family BMP antagonist	GO:0038098 sequestering of BMP from receptor via BMP binding;GO:0035582 sequestering of BMP in extracellular matrix;GO:0048263 determination of dorsal identity		0	0	1	0	0	0	1	0	0	0	0	0	1	0	0	0	0	0
Nsmce4a	67872	symbol	M. musculus	67872	M. musculus	Nsmce4a	NSE4 homolog A, SMC5-SMC6 complex component	GO:0006281 DNA repair;GO:0006259 DNA metabolic process;GO:0006974 DNA damage response		0	0	0	0	0	0	0	0	0	0	0	0	0	0	0	0	0	0
Tpd52	21985	symbol	M. musculus	21985	M. musculus	Tpd52	tumor protein D52	GO:0030183 B cell differentiation;GO:0042113 B cell activation;GO:0030098 lymphocyte differentiation		0	0	0	0	1	0	0	0	1	0	0	0	0	0	0	0	0	0
Rbm39	170791	symbol	M. musculus	170791	M. musculus	Rbm39	RNA binding motif protein 39	GO:0048024 regulation of mRNA splicing, via spliceosome;GO:0050684 regulation of mRNA processing;GO:0043484 regulation of RNA splicing		0	0	0	0	0	0	0	0	0	0	1	0	0	0	0	0	0	0
Atp6v0d1	11972	symbol	M. musculus	11972	M. musculus	Atp6v0d1	ATPase, H+ transporting, lysosomal V0 subunit D1	GO:0036295 cellular response to increased oxygen levels;GO:0036296 response to increased oxygen levels;GO:0097401 synaptic vesicle lumen acidification		1	1	0	1	0	0	0	0	0	0	0	0	0	0	0	0	0	0
Il1f9	54448	gene_synonym	M. musculus	54448	M. musculus	Il36a	interleukin 36A	GO:0032635 interleukin-6 production;GO:0002437 inflammatory response to antigenic stimulus;GO:0032755 positive regulation of interleukin-6 production		0	0	0	0	0	0	0	0	0	0	0	0	0	0	0	0	0	0
Svep1	64817	symbol	M. musculus	64817	M. musculus	Svep1	sushi, von Willebrand factor type A, EGF and pentraxin domain containing 1	GO:0003017 lymph circulation;GO:0048014 Tie signaling pathway;GO:0045959 negative regulation of complement activation, classical pathway		0	0	0	1	0	0	0	0	0	0	0	0	0	0	0	0	0	0
Mmp23	26561	symbol	M. musculus	26561	M. musculus	Mmp23	matrix metallopeptidase 23	GO:0030574 collagen catabolic process;GO:0032963 collagen metabolic process;GO:0030198 extracellular matrix organization		0	0	0	1	0	0	0	0	0	0	0	0	0	0	0	0	0	0
Guk1	14923	symbol	M. musculus	14923	M. musculus	Guk1	guanylate kinase 1	GO:0006185 dGDP biosynthetic process;GO:0009183 purine deoxyribonucleoside diphosphate biosynthetic process;GO:0046711 GDP biosynthetic process	yes	1	0	0	0	0	0	0	0	0	0	0	0	0	0	1	0	0	0
Creld2	76737	symbol	M. musculus	76737	M. musculus	Creld2	cysteine-rich with EGF-like domains 2	GO:0008150 biological_process		0	0	0	0	0	0	0	0	0	0	0	0	0	0	0	0	0	0
Ankrd13c	433667	symbol	M. musculus	433667	M. musculus	Ankrd13c	ankyrin repeat domain 13c	GO:0006621 protein retention in ER lumen;GO:0035437 maintenance of protein localization in endoplasmic reticulum;GO:2000209 regulation of anoikis		0	0	0	0	0	0	1	0	0	0	0	0	0	0	0	0	0	0
Atp5g3	228033	gene_synonym	M. musculus	228033	M. musculus	Atp5mc3	ATP synthase membrane subunit c locus 3	GO:0046931 pore complex assembly;GO:0015986 proton motive force-driven ATP synthesis;GO:0006754 ATP biosynthetic process		1	0	0	0	0	0	0	0	0	0	0	0	0	0	0	0	0	0
Got1	14718	symbol	M. musculus	14718	M. musculus	Got1	glutamic-oxaloacetic transaminase 1, soluble	GO:1990267 response to transition metal nanoparticle;GO:0019550 glutamate catabolic process to aspartate;GO:0019551 glutamate catabolic process to 2-oxoglutarate		1	0	0	0	0	0	0	0	0	1	0	0	0	0	0	0	0	0
Ddost	13200	symbol	M. musculus	13200	M. musculus	Ddost	dolichyl-di-phosphooligosaccharide-protein glycotransferase	GO:0018279 protein N-linked glycosylation via asparagine;GO:0006487 protein N-linked glycosylation;GO:0006486 protein glycosylation		1	1	0	0	0	0	0	0	1	0	0	1	0	0	0	0	0	0
Nenf	66208	symbol	M. musculus	66208	M. musculus	Nenf	neuron derived neurotrophic factor	GO:0032099 negative regulation of appetite;GO:0032096 negative regulation of response to food;GO:0032105 negative regulation of response to extracellular stimulus		0	0	0	0	0	0	0	0	0	0	0	0	0	0	0	0	0	0
Sema4a	20351	symbol	M. musculus	20351	M. musculus	Sema4a	sema domain, immunoglobulin domain (Ig), transmembrane domain (TM) and short cytoplasmic domain, (semaphorin) 4A	GO:1904891 positive regulation of excitatory synapse assembly;GO:1905704 positive regulation of inhibitory synapse assembly;GO:1905702 regulation of inhibitory synapse assembly		0	0	0	1	0	0	0	0	1	0	0	0	1	0	0	0	0	0
Lor	16939	gene_synonym	M. musculus	16939	M. musculus	Loricrin	loricrin cornified envelope precursor protein	GO:0018149 peptide cross-linking;GO:0031424 keratinization;GO:0030216 keratinocyte differentiation		0	0	0	0	0	0	0	0	0	0	0	0	0	0	0	0	0	0
Nap1l5	58243	symbol	M. musculus	58243	M. musculus	Nap1l5	nucleosome assembly protein 1-like 5	GO:0006334 nucleosome assembly;GO:0034728 nucleosome organization;GO:0065004 protein-DNA complex assembly		0	0	0	0	0	1	0	0	0	0	0	0	0	0	0	0	0	0
Igkc	16071	symbol	M. musculus	16071	M. musculus	Igkc	immunoglobulin kappa constant	GO:0030183 B cell differentiation;GO:0042113 B cell activation;GO:0030098 lymphocyte differentiation		0	0	0	0	0	0	0	0	1	0	0	0	0	0	0	0	0	0
Ano10	102566	symbol	M. musculus	102566	M. musculus	Ano10	anoctamin 10	GO:1902476 chloride transmembrane transport;GO:0098656 monoatomic anion transmembrane transport;GO:0098661 inorganic anion transmembrane transport		0	0	0	0	0	0	0	0	0	0	0	0	0	0	0	0	0	0
Col16a1	107581	symbol	M. musculus	107581	M. musculus	Col16a1	collagen, type XVI, alpha 1	GO:0033622 integrin activation;GO:0051894 positive regulation of focal adhesion assembly;GO:0150117 positive regulation of cell-substrate junction organization		0	0	0	1	0	0	0	0	0	0	0	0	0	1	0	0	0	0
Snap25	20614	symbol	M. musculus	20614	M. musculus	Snap25	synaptosomal-associated protein 25	GO:0098967 exocytic insertion of neurotransmitter receptor to postsynaptic membrane;GO:0099525 presynaptic dense core vesicle exocytosis;GO:0099011 neuronal dense core vesicle exocytosis		0	1	1	0	0	0	0	0	0	0	0	0	0	0	0	0	0	0
Txndc5	105245	symbol	M. musculus	105245	M. musculus	Txndc5	thioredoxin domain containing 5	GO:0006457 protein folding;GO:0051604 protein maturation;GO:0010467 gene expression		0	1	0	0	1	0	0	0	0	0	0	1	0	0	0	0	0	0
Tkt	21881	symbol	M. musculus	21881	M. musculus	Tkt	transketolase	GO:0009052 pentose-phosphate shunt, non-oxidative branch;GO:0051167 xylulose 5-phosphate metabolic process;GO:1901159 xylulose 5-phosphate biosynthetic process		1	0	0	0	0	0	0	0	0	0	0	0	0	0	0	0	0	0
Luc7l2	192196	symbol	M. musculus	192196	M. musculus	Luc7l2	LUC7-like 2 (S. cerevisiae)	GO:0006376 mRNA splice site recognition;GO:0000245 spliceosomal complex assembly;GO:0022618 protein-RNA complex assembly		0	0	0	0	0	0	0	0	0	0	1	0	0	0	0	0	0	0
Man2a2	140481	symbol	M. musculus	140481	M. musculus	Man2a2	mannosidase 2, alpha 2	GO:0006013 mannose metabolic process;GO:0006491 N-glycan processing;GO:0006517 protein deglycosylation		0	0	0	0	0	0	0	0	0	0	0	0	0	0	0	0	0	0
Ppp2r3d	19054	symbol	M. musculus	19054	M. musculus	Ppp2r3d	protein phosphatase 2 (formerly 2A), regulatory subunit B'', delta	GO:2000134 negative regulation of G1/S transition of mitotic cell cycle;GO:1902807 negative regulation of cell cycle G1/S phase transition;GO:0006470 protein dephosphorylation		0	0	0	1	0	0	0	0	0	0	0	0	0	0	0	0	0	0
Gpr37l1	171469	symbol	M. musculus	171469	M. musculus	Gpr37l1	G protein-coupled receptor 37-like 1	GO:0021940 positive regulation of cerebellar granule cell precursor proliferation;GO:0021936 regulation of cerebellar granule cell precursor proliferation;GO:0060020 Bergmann glial cell differentiation		0	0	0	0	0	0	0	0	0	0	0	0	0	0	0	0	0	0
Myoc	17926	symbol	M. musculus	17926	M. musculus	Myoc	myocilin	GO:0014734 skeletal muscle hypertrophy;GO:0045162 clustering of voltage-gated sodium channels;GO:0043501 skeletal muscle adaptation		0	0	0	1	0	0	0	1	0	1	0	0	0	1	0	0	0	0
Rbm17	76938	symbol	M. musculus	76938	M. musculus	Rbm17	RNA binding motif protein 17	GO:0045292 mRNA cis splicing, via spliceosome;GO:0000380 alternative mRNA splicing, via spliceosome;GO:0000375 RNA splicing, via transesterification reactions		0	0	0	0	0	0	0	0	0	0	1	0	0	0	0	0	0	0
Slc39a13	68427	symbol	M. musculus	68427	M. musculus	Slc39a13	solute carrier family 39 (metal ion transporter), member 13	GO:0071577 zinc ion transmembrane transport;GO:0006882 intracellular zinc ion homeostasis;GO:0006829 zinc ion transport		1	0	0	1	0	0	0	0	0	0	0	0	0	0	0	0	0	0
Ssr2	66256	symbol	M. musculus	66256	M. musculus	Ssr2	signal sequence receptor, beta	GO:0001701 in utero embryonic development;GO:0043009 chordate embryonic development;GO:0009792 embryo development ending in birth or egg hatching		0	0	0	0	0	0	0	0	0	0	0	1	0	0	0	0	0	0
Tbce	70430	symbol	M. musculus	70430	M. musculus	Tbce	tubulin-specific chaperone E	GO:0048936 peripheral nervous system neuron axonogenesis;GO:0007023 post-chaperonin tubulin folding pathway;GO:0014889 muscle atrophy		0	0	0	0	0	0	0	1	0	0	0	0	0	0	0	0	0	0
Phactr1	218194	symbol	M. musculus	218194	M. musculus	Phactr1	phosphatase and actin regulator 1	GO:0140059 dendrite arborization;GO:0030038 contractile actin filament bundle assembly;GO:0043149 stress fiber assembly		0	0	0	0	0	0	0	0	0	0	0	0	0	0	0	0	1	0
St3gal1	20442	symbol	M. musculus	20442	M. musculus	St3gal1	ST3 beta-galactoside alpha-2,3-sialyltransferase 1	GO:0002319 memory B cell differentiation;GO:0090715 immunological memory formation process;GO:1905403 negative regulation of activated CD8-positive, alpha-beta T cell apoptotic process		1	0	0	0	0	0	0	0	1	0	0	0	0	0	0	0	0	0
Spi1	20375	symbol	M. musculus	20375	M. musculus	Spi1	Spi-1 proto-oncogene	GO:0098508 endothelial to hematopoietic transition;GO:0002316 follicular B cell differentiation;GO:0002572 pro-T cell differentiation		0	1	0	1	0	0	0	0	1	0	0	0	0	0	0	0	0	0
Srrm2	75956	symbol	M. musculus	75956	M. musculus	Srrm2	serine/arginine repetitive matrix 2	GO:0000375 RNA splicing, via transesterification reactions;GO:0000377 RNA splicing, via transesterification reactions with bulged adenosine as nucleophile;GO:0000398 mRNA splicing, via spliceosome		0	0	0	0	0	0	0	0	0	0	1	0	0	0	0	0	0	0
Prdx5	54683	symbol	M. musculus	54683	M. musculus	Prdx5	peroxiredoxin 5	GO:0060785 regulation of apoptosis involved in tissue homeostasis;GO:0016480 negative regulation of transcription by RNA polymerase III;GO:0070995 NADPH oxidation		1	0	0	0	0	0	0	0	0	0	0	0	0	0	0	0	0	0
Thbs1	21825	symbol	M. musculus	21825	M. musculus	Thbs1	thrombospondin 1	GO:0002581 negative regulation of antigen processing and presentation of peptide or polysaccharide antigen via MHC class II;GO:0002605 negative regulation of dendritic cell antigen processing and presentation;GO:0010751 negative regulation of nitric oxide mediated signal transduction		0	0	0	1	0	0	0	0	0	1	0	0	1	1	0	0	0	0
Col1a1	12842	symbol	M. musculus	12842	M. musculus	Col1a1	collagen, type I, alpha 1	GO:0001957 intramembranous ossification;GO:0036072 direct ossification;GO:0032964 collagen biosynthetic process		1	0	0	1	0	0	1	0	0	0	0	0	0	1	0	0	1	0
Scand1	19018	symbol	M. musculus	19018	M. musculus	Scand1	SCAN domain-containing 1	GO:0045893 positive regulation of DNA-templated transcription;GO:1902680 positive regulation of RNA biosynthetic process;GO:0051254 positive regulation of RNA metabolic process		0	0	0	0	0	0	0	0	0	0	0	0	0	0	0	0	0	0
Park7	57320	symbol	M. musculus	57320	M. musculus	Park7	Parkinson disease (autosomal recessive, early onset) 7	GO:0036471 cellular response to glyoxal;GO:0036526 peptidyl-cysteine deglycation;GO:0036527 peptidyl-arginine deglycation		1	0	1	0	0	0	1	0	0	1	1	0	0	0	0	0	0	0
Stx16	228960	symbol	M. musculus	228960	M. musculus	Stx16	syntaxin 16	GO:0048278 vesicle docking;GO:0032456 endocytic recycling;GO:0140056 organelle localization by membrane tethering		0	1	0	0	0	0	0	0	0	0	0	0	0	0	0	1	0	0
Glg1	20340	symbol	M. musculus	20340	M. musculus	Glg1	golgi apparatus protein 1	GO:0010955 negative regulation of protein processing;GO:1903318 negative regulation of protein maturation;GO:0032330 regulation of chondrocyte differentiation		0	0	0	1	0	0	0	0	0	0	0	0	0	0	0	0	0	0
Fis1	66437	symbol	M. musculus	66437	M. musculus	Fis1	fission, mitochondrial 1	GO:0032471 negative regulation of endoplasmic reticulum calcium ion concentration;GO:0016559 peroxisome fission;GO:2000192 negative regulation of fatty acid transport		0	1	0	0	0	0	1	0	0	1	0	0	0	0	0	0	0	0
Pcolce	18542	symbol	M. musculus	18542	M. musculus	Pcolce	procollagen C-endopeptidase enhancer protein	GO:1990830 cellular response to leukemia inhibitory factor;GO:1990823 response to leukemia inhibitory factor;GO:0071345 cellular response to cytokine stimulus		0	0	0	1	0	0	0	0	0	0	1	0	0	0	0	0	0	0
Rtn3	20168	symbol	M. musculus	20168	M. musculus	Rtn3	reticulon 3	GO:0071787 endoplasmic reticulum tubular network formation;GO:0071786 endoplasmic reticulum tubular network organization;GO:1902430 negative regulation of amyloid-beta formation		1	0	0	0	0	0	0	0	0	0	0	0	0	0	0	0	1	0
Cdipt	52858	symbol	M. musculus	52858	M. musculus	Cdipt	CDP-diacylglycerol--inositol 3-phosphatidyltransferase	GO:0046341 CDP-diacylglycerol metabolic process;GO:0006661 phosphatidylinositol biosynthetic process;GO:0046488 phosphatidylinositol metabolic process		1	0	0	0	0	0	0	0	0	0	0	0	0	0	0	0	0	1
Pfn2	18645	symbol	M. musculus	18645	M. musculus	Pfn2	profilin 2	GO:1900028 negative regulation of ruffle assembly;GO:0098885 modification of postsynaptic actin cytoskeleton;GO:0099010 modification of postsynaptic structure		1	1	0	0	0	0	0	0	0	0	0	0	1	0	0	0	0	0
Wls	68151	symbol	M. musculus	68151	M. musculus	Wls	wntless WNT ligand secretion mediator	GO:0061355 Wnt protein secretion;GO:0061357 positive regulation of Wnt protein secretion;GO:0061356 regulation of Wnt protein secretion		0	0	1	1	0	0	0	0	0	0	0	0	0	0	0	0	1	0
Golt1b	66964	symbol	M. musculus	66964	M. musculus	Golt1b	golgi transport 1B	GO:0042147 retrograde transport, endosome to Golgi;GO:0006888 endoplasmic reticulum to Golgi vesicle-mediated transport;GO:0016482 cytosolic transport		0	0	0	0	0	0	0	0	0	0	0	0	0	0	0	1	0	0
Gatm	67092	symbol	M. musculus	67092	M. musculus	Gatm	glycine amidinotransferase (L-arginine:glycine amidinotransferase)	GO:0006601 creatine biosynthetic process;GO:0006600 creatine metabolic process;GO:0014889 muscle atrophy		0	0	0	0	0	0	0	1	0	0	0	0	0	0	0	0	0	0
Il11ra1	16157	symbol	M. musculus	16157	M. musculus	Il11ra1	interleukin 11 receptor subunit alpha 1	GO:0038154 interleukin-11-mediated signaling pathway;GO:0046697 decidualization;GO:0001779 natural killer cell differentiation		0	0	0	0	0	0	0	0	1	0	0	0	0	0	0	0	1	0
Ndufa12	66414	symbol	M. musculus	66414	M. musculus	Ndufa12	NADH:ubiquinone oxidoreductase subunit A12	GO:0042776 proton motive force-driven mitochondrial ATP synthesis;GO:0010257 NADH dehydrogenase complex assembly;GO:0032981 mitochondrial respiratory chain complex I assembly		1	0	0	0	0	0	0	0	0	0	0	0	0	0	0	0	0	0
Ctbp1	13016	symbol	M. musculus	13016	M. musculus	Ctbp1	C-terminal binding protein 1	GO:0098928 presynaptic signal transduction;GO:0099526 presynapse to nucleus signaling pathway;GO:0097091 synaptic vesicle clustering		0	1	0	0	0	0	0	0	0	0	0	0	0	0	0	0	0	0
Lrrc14	223664	symbol	M. musculus	223664	M. musculus	Lrrc14	leucine rich repeat containing 14	GO:0034122 negative regulation of toll-like receptor signaling pathway;GO:0034121 regulation of toll-like receptor signaling pathway;GO:0032088 negative regulation of NF-kappaB transcription factor activity		0	0	0	0	0	0	0	0	0	0	0	0	0	0	0	0	0	0
Eid1	58521	symbol	M. musculus	58521	M. musculus	Eid1	EP300 interacting inhibitor of differentiation 1	GO:0000122 negative regulation of transcription by RNA polymerase II;GO:0045892 negative regulation of DNA-templated transcription;GO:1902679 negative regulation of RNA biosynthetic process		0	0	0	0	0	0	0	0	0	0	0	0	0	0	0	0	0	0
Os9	216440	symbol	M. musculus	216440	M. musculus	Os9	amplified in osteosarcoma	GO:0006621 protein retention in ER lumen;GO:1904153 negative regulation of retrograde protein transport, ER to cytosol;GO:0070862 negative regulation of protein exit from endoplasmic reticulum		0	0	0	1	0	0	1	0	0	0	0	1	0	0	0	0	0	0
Spty2d1	101685	symbol	M. musculus	101685	M. musculus	Spty2d1	SPT2 chromatin protein domain containing 1	GO:0006360 transcription by RNA polymerase I;GO:0006334 nucleosome assembly;GO:0034728 nucleosome organization		0	0	0	0	0	1	0	0	0	0	0	0	0	0	0	0	0	0
Sept2	18000	gene_synonym	M. musculus	18000	M. musculus	Septin2	septin 2	GO:0002036 regulation of L-glutamate import across plasma membrane;GO:0010958 regulation of amino acid import across plasma membrane;GO:1903789 regulation of amino acid transmembrane transport		0	1	0	0	0	0	0	0	0	0	0	0	0	0	0	0	0	0
Atp5c1	11949	gene_synonym	M. musculus	11949	M. musculus	Atp5f1c	ATP synthase F1 subunit gamma	GO:0042776 proton motive force-driven mitochondrial ATP synthesis;GO:0015986 proton motive force-driven ATP synthesis;GO:0006754 ATP biosynthetic process		1	0	0	0	0	0	0	0	0	0	0	0	0	0	0	0	0	0
Cybrd1	73649	symbol	M. musculus	73649	M. musculus	Cybrd1	cytochrome b reductase 1	GO:0140576 ascorbate homeostasis;GO:0010039 response to iron ion;GO:0060586 multicellular organismal-level iron ion homeostasis		0	0	0	0	0	0	0	0	0	0	0	0	0	0	0	0	0	0
Disp2	214240	symbol	M. musculus	214240	M. musculus	Disp2	dispatched RND transporter family member 2	GO:0007224 smoothened signaling pathway;GO:0007166 cell surface receptor signaling pathway;GO:0007165 signal transduction		0	0	0	0	0	0	0	0	0	0	0	0	0	0	0	0	0	0
Dut	110074	symbol	M. musculus	110074	M. musculus	Dut	deoxyuridine triphosphatase	GO:0006226 dUMP biosynthetic process;GO:0046080 dUTP metabolic process;GO:0046081 dUTP catabolic process		1	0	0	0	0	0	0	0	0	0	0	0	0	0	1	0	0	0
Pgrmc2	70804	symbol	M. musculus	70804	M. musculus	Pgrmc2	progesterone receptor membrane component 2	GO:0015886 heme transport;GO:1901678 iron coordination entity transport;GO:0006826 iron ion transport		0	0	0	1	0	0	0	0	0	0	0	0	0	0	0	0	0	0
Ppm1l	242083	symbol	M. musculus	242083	M. musculus	Ppm1l	protein phosphatase 1 (formerly 2C)-like	GO:0006470 protein dephosphorylation;GO:0000165 MAPK cascade;GO:0007178 transmembrane receptor protein serine/threonine kinase signaling pathway		0	0	0	1	0	0	0	0	0	0	0	0	0	0	0	0	0	0
Zranb2	53861	symbol	M. musculus	53861	M. musculus	Zranb2	zinc finger, RAN-binding domain containing 2	GO:0008380 RNA splicing;GO:0006397 mRNA processing;GO:0016071 mRNA metabolic process		0	0	0	0	0	0	0	0	0	0	1	0	0	0	0	0	0	0
Macf1	11426	symbol	M. musculus	11426	M. musculus	Macf1	microtubule-actin crosslinking factor 1	GO:0150011 regulation of neuron projection arborization;GO:0006620 post-translational protein targeting to endoplasmic reticulum membrane;GO:0043001 Golgi to plasma membrane protein transport		0	0	0	0	0	0	1	0	0	0	0	0	1	1	0	0	0	0
Sf3a3	75062	symbol	M. musculus	75062	M. musculus	Sf3a3	splicing factor 3a, subunit 3	GO:1903241 U2-type prespliceosome assembly;GO:0000245 spliceosomal complex assembly;GO:0022618 protein-RNA complex assembly		0	0	0	0	0	0	0	0	0	0	1	0	0	0	0	0	0	0
Paqr7	71904	symbol	M. musculus	71904	M. musculus	Paqr7	progestin and adipoQ receptor family member VII	GO:0048477 oogenesis;GO:0007292 female gamete generation;GO:0048545 response to steroid hormone		0	0	0	0	0	0	0	0	0	0	0	0	0	0	0	0	0	0
Srp72	66661	symbol	M. musculus	66661	M. musculus	Srp72	signal recognition particle 72	GO:0006614 SRP-dependent cotranslational protein targeting to membrane;GO:0006613 cotranslational protein targeting to membrane;GO:0045047 protein targeting to ER		0	0	0	0	0	0	1	0	0	0	0	0	0	0	0	0	0	0
Pigg	433931	symbol	M. musculus	433931	M. musculus	Pigg	phosphatidylinositol glycan anchor biosynthesis, class G	GO:0006506 GPI anchor biosynthetic process;GO:0006505 GPI anchor metabolic process;GO:0009247 glycolipid biosynthetic process		1	0	0	0	0	0	0	0	1	0	0	0	0	0	0	0	0	1
Nipsnap2	14467	symbol	M. musculus	14467	M. musculus	Nipsnap2	nipsnap homolog 2	GO:1901843 positive regulation of high voltage-gated calcium channel activity;GO:1901387 positive regulation of voltage-gated calcium channel activity;GO:1901841 regulation of high voltage-gated calcium channel activity		1	0	0	0	0	0	0	0	0	0	0	0	0	0	0	0	0	0
Ap1s1	11769	symbol	M. musculus	11769	M. musculus	Ap1s1	adaptor protein complex AP-1, sigma 1	GO:0110010 basolateral protein secretion;GO:1903232 melanosome assembly;GO:0060155 platelet dense granule organization		0	1	1	0	1	0	0	0	0	0	0	0	0	0	0	1	0	0
Cpsf4	54188	symbol	M. musculus	54188	M. musculus	Cpsf4	cleavage and polyadenylation specific factor 4	GO:0006397 mRNA processing;GO:0016071 mRNA metabolic process;GO:0006396 RNA processing		0	0	0	0	0	0	0	0	0	0	1	0	0	0	0	0	0	0
Vamp8	22320	symbol	M. musculus	22320	M. musculus	Vamp8	vesicle-associated membrane protein 8	GO:1902278 positive regulation of pancreatic amylase secretion;GO:0070625 zymogen granule exocytosis;GO:1902276 regulation of pancreatic amylase secretion		0	1	1	1	1	0	0	0	0	0	0	0	0	0	0	0	0	0
Dedd2	67379	symbol	M. musculus	67379	M. musculus	Dedd2	death effector domain-containing DNA binding protein 2	GO:0030262 apoptotic nuclear changes;GO:0006921 cellular component disassembly involved in execution phase of apoptosis;GO:0008625 extrinsic apoptotic signaling pathway via death domain receptors		0	0	0	0	0	0	0	0	1	1	0	0	0	0	0	0	0	0
Zfp719	210105	symbol	M. musculus	210105	M. musculus	Zfp719	zinc finger protein 719	GO:0006355 regulation of DNA-templated transcription;GO:2001141 regulation of RNA biosynthetic process;GO:0051252 regulation of RNA metabolic process		0	0	0	0	0	0	0	0	0	0	0	0	0	0	0	0	0	0
Bax	12028	symbol	M. musculus	12028	M. musculus	Bax	BCL2-associated X protein	GO:0032976 release of matrix enzymes from mitochondria;GO:0001777 T cell homeostatic proliferation;GO:0002352 B cell negative selection		1	1	0	1	0	0	1	0	1	1	0	1	0	0	0	0	1	0
Wdr11	207425	symbol	M. musculus	207425	M. musculus	Wdr11	WD repeat domain 11	GO:0099041 vesicle tethering to Golgi;GO:0099022 vesicle tethering;GO:0006903 vesicle targeting		0	0	0	0	0	0	0	0	0	0	0	0	0	0	0	0	1	0
Tmem218	66279	symbol	M. musculus	66279	M. musculus	Tmem218	transmembrane protein 218	GO:0008150 biological_process		0	0	0	0	0	0	0	0	0	0	0	0	0	0	0	0	0	0
H2afy2	404634	gene_synonym	M. musculus	404634	M. musculus	Macroh2a2	macroH2A.2 histone	GO:1901837 negative regulation of transcription of nucleolar large rRNA by RNA polymerase I;GO:0071169 establishment of protein localization to chromatin;GO:0016479 negative regulation of transcription by RNA polymerase I		0	0	0	0	0	1	1	0	0	0	0	0	0	0	0	0	1	0
Purb	19291	symbol	M. musculus	19291	M. musculus	Purb	purine rich element binding protein B	GO:0000122 negative regulation of transcription by RNA polymerase II;GO:0045892 negative regulation of DNA-templated transcription;GO:1902679 negative regulation of RNA biosynthetic process		0	0	0	0	0	0	0	0	0	0	0	0	0	0	0	0	0	0
Lrrc59	98238	symbol	M. musculus	98238	M. musculus	Lrrc59	leucine rich repeat containing 59			0	0	0	0	0	0	0	0	0	0	0	0	0	0	0	0	0	0
Xylt2	217119	symbol	M. musculus	217119	M. musculus	Xylt2	xylosyltransferase II	GO:0030210 heparin biosynthetic process;GO:0030202 heparin metabolic process;GO:0050650 chondroitin sulfate proteoglycan biosynthetic process		1	0	0	0	0	0	0	0	0	0	0	0	0	0	0	0	0	0
Gfap	14580	symbol	M. musculus	14580	M. musculus	Gfap	glial fibrillary acidic protein	GO:0010625 positive regulation of Schwann cell proliferation;GO:0014010 Schwann cell proliferation;GO:1904714 regulation of chaperone-mediated autophagy		0	0	0	1	0	0	0	0	0	0	0	0	0	0	0	0	0	0
Cant1	76025	symbol	M. musculus	76025	M. musculus	Cant1	calcium activated nucleotidase 1	GO:0030166 proteoglycan biosynthetic process;GO:0009191 ribonucleoside diphosphate catabolic process;GO:0009134 nucleoside diphosphate catabolic process		1	1	0	0	0	0	0	0	0	0	0	0	0	0	1	0	0	0
Pik3cg	30955	symbol	M. musculus	30955	M. musculus	Pik3cg	phosphatidylinositol-4,5-bisphosphate 3-kinase catalytic subunit gamma	GO:0010897 negative regulation of triglyceride catabolic process;GO:2000270 negative regulation of fibroblast apoptotic process;GO:0003376 sphingosine-1-phosphate receptor signaling pathway	yes	1	0	0	1	0	0	0	0	0	0	0	0	1	0	0	0	0	1
Papola	18789	symbol	M. musculus	18789	M. musculus	Papola	poly (A) polymerase alpha	GO:0180011 cytoplasmic polyadenylation;GO:0180010 co-transcriptional mRNA 3'-end processing, cleavage and polyadenylation pathway;GO:0180012 co-transcriptional RNA 3'-end processing, cleavage and polyadenylation pathway		0	0	0	0	0	0	0	0	0	0	1	0	0	0	0	0	0	0
Larp4b	217980	symbol	M. musculus	217980	M. musculus	Larp4b	La ribonucleoprotein 4B	GO:1905870 positive regulation of 3'-UTR-mediated mRNA stabilization;GO:1905868 regulation of 3'-UTR-mediated mRNA stabilization;GO:0045727 positive regulation of translation		0	0	0	0	0	0	0	0	0	0	0	0	0	0	0	0	0	0
Hist1h1d	14957	gene_synonym	M. musculus	14957	M. musculus	H1f3	H1.3 linker histone, cluster member	GO:0030261 chromosome condensation;GO:0045910 negative regulation of DNA recombination;GO:0006334 nucleosome assembly		0	0	0	0	0	1	0	0	0	0	0	0	0	0	0	0	0	0
Smim13	108934	symbol	M. musculus	108934	M. musculus	Smim13	small integral membrane protein 13	GO:0008150 biological_process		0	0	0	0	0	0	0	0	0	0	0	0	0	0	0	0	0	0
Rab24	19336	symbol	M. musculus	19336	M. musculus	Rab24	RAB24, member RAS oncogene family	GO:0006914 autophagy;GO:0061919 process utilizing autophagic mechanism;GO:0006886 intracellular protein transport		0	1	0	0	0	0	0	0	0	0	0	0	0	0	0	0	0	0
Ndufb9	66218	symbol	M. musculus	66218	M. musculus	Ndufb9	NADH:ubiquinone oxidoreductase subunit B9	GO:0006120 mitochondrial electron transport, NADH to ubiquinone;GO:0019646 aerobic electron transport chain;GO:0042776 proton motive force-driven mitochondrial ATP synthesis		1	0	0	0	0	0	0	0	0	0	0	0	0	0	0	0	0	0
Snap29	67474	symbol	M. musculus	67474	M. musculus	Snap29	synaptosomal-associated protein 29	GO:0016240 autophagosome membrane docking;GO:0031629 synaptic vesicle fusion to presynaptic active zone membrane;GO:0099500 vesicle fusion to plasma membrane		0	1	1	0	0	0	0	0	0	0	0	0	0	0	0	0	0	0

## Sheet: Enrichment upregulation
	Category	Term	Description	LogP	Log(q-value)	Genes	Symbols	InTerm_InList
1_Summary	GO Biological Processes	GO:1901137	carbohydrate derivative biosynthetic process	-5.03214	-0.772234	11949,13200,14923,20442,21881,66218,66414,76025,110074,217119,228033,433931,30955,52858,54683,57320,12028,68427,14718,11972,12842,12843,14467,18645,20168	Atp5f1c,Ddost,Guk1,St3gal1,Tkt,Ndufb9,Ndufa12,Cant1,Dut,Xylt2,Atp5mc3,Pigg,Pik3cg,Cdipt,Prdx5,Park7,Bax,Slc39a13,Got1,Atp6v0d1,Col1a1,Col1a2,Nipsnap2,Pfn2,Rtn3	25/-
1_Member	GO Biological Processes	GO:1901137	carbohydrate derivative biosynthetic process	-5.03214	-0.772234	11949,13200,14923,20442,21881,66218,66414,76025,110074,217119,228033,433931	Atp5f1c,Ddost,Guk1,St3gal1,Tkt,Ndufb9,Ndufa12,Cant1,Dut,Xylt2,Atp5mc3,Pigg	12/560
1_Member	GO Biological Processes	GO:0090407	organophosphate biosynthetic process	-4.11949	-0.558556	11949,14923,21881,30955,52858,66218,66414,110074,228033,433931	Atp5f1c,Guk1,Tkt,Pik3cg,Cdipt,Ndufb9,Ndufa12,Dut,Atp5mc3,Pigg	10/486
1_Member	GO Biological Processes	GO:0006753	nucleoside phosphate metabolic process	-3.94725	-0.546361	11949,14923,21881,54683,57320,66218,66414,76025,110074,228033	Atp5f1c,Guk1,Tkt,Prdx5,Park7,Ndufb9,Ndufa12,Cant1,Dut,Atp5mc3	10/510
1_Member	KEGG Pathway	mmu05012	Parkinson disease - Mus musculus (house mouse)	-3.65893	-0.536576	11949,12028,57320,66218,66414,68427,228033	Atp5f1c,Bax,Park7,Ndufb9,Ndufa12,Slc39a13,Atp5mc3	7/266
1_Member	GO Biological Processes	GO:0055086	nucleobase-containing small molecule metabolic process	-3.60036	-0.536576	11949,14923,21881,54683,57320,66218,66414,76025,110074,228033	Atp5f1c,Guk1,Tkt,Prdx5,Park7,Ndufb9,Ndufa12,Cant1,Dut,Atp5mc3	10/563
1_Member	GO Biological Processes	GO:0015986	proton motive force-driven ATP synthesis	-3.57552	-0.536576	11949,66218,66414,228033	Atp5f1c,Ndufb9,Ndufa12,Atp5mc3	4/68
1_Member	Reactome Gene Sets	R-MMU-163200	Respiratory electron transport, ATP synthesis by chemiosmotic coupling, and heat production by uncoupling proteins.	-3.51773	-0.536576	11949,14718,66218,66414,228033	Atp5f1c,Got1,Ndufb9,Ndufa12,Atp5mc3	5/128
1_Member	KEGG Pathway	mmu00190	Oxidative phosphorylation - Mus musculus (house mouse)	-3.39649	-0.534158	11949,11972,66218,66414,228033	Atp5f1c,Atp6v0d1,Ndufb9,Ndufa12,Atp5mc3	5/136
1_Member	GO Biological Processes	GO:0009141	nucleoside triphosphate metabolic process	-3.39123	-0.534158	11949,14923,66218,66414,110074,228033	Atp5f1c,Guk1,Ndufb9,Ndufa12,Dut,Atp5mc3	6/210
1_Member	KEGG Pathway	mmu05415	Diabetic cardiomyopathy - Mus musculus (house mouse)	-3.3694	-0.534158	11949,12842,12843,66218,66414,228033	Atp5f1c,Col1a1,Col1a2,Ndufb9,Ndufa12,Atp5mc3	6/212
1_Member	GO Biological Processes	GO:0009117	nucleotide metabolic process	-3.3086	-0.534158	11949,14923,21881,54683,57320,66218,66414,110074,228033	Atp5f1c,Guk1,Tkt,Prdx5,Park7,Ndufb9,Ndufa12,Dut,Atp5mc3	9/503
1_Member	GO Biological Processes	GO:0006754	ATP biosynthetic process	-3.3054	-0.534158	11949,66218,66414,228033	Atp5f1c,Ndufb9,Ndufa12,Atp5mc3	4/80
1_Member	GO Biological Processes	GO:0009165	nucleotide biosynthetic process	-3.144	-0.444628	11949,14923,66218,66414,110074,228033	Atp5f1c,Guk1,Ndufb9,Ndufa12,Dut,Atp5mc3	6/234
1_Member	GO Biological Processes	GO:1901293	nucleoside phosphate biosynthetic process	-3.12475	-0.444628	11949,14923,66218,66414,110074,228033	Atp5f1c,Guk1,Ndufb9,Ndufa12,Dut,Atp5mc3	6/236
1_Member	GO Biological Processes	GO:0009206	purine ribonucleoside triphosphate biosynthetic process	-3.07636	-0.432339	11949,66218,66414,228033	Atp5f1c,Ndufb9,Ndufa12,Atp5mc3	4/92
1_Member	GO Biological Processes	GO:0009145	purine nucleoside triphosphate biosynthetic process	-3.05878	-0.432339	11949,66218,66414,228033	Atp5f1c,Ndufb9,Ndufa12,Atp5mc3	4/93
1_Member	WikiPathways	WP295	Electron transport chain	-3.05878	-0.432339	11949,66218,66414,228033	Atp5f1c,Ndufb9,Ndufa12,Atp5mc3	4/93
1_Member	GO Biological Processes	GO:0009201	ribonucleoside triphosphate biosynthetic process	-2.99047	-0.402305	11949,66218,66414,228033	Atp5f1c,Ndufb9,Ndufa12,Atp5mc3	4/97
1_Member	GO Biological Processes	GO:0009152	purine ribonucleotide biosynthetic process	-2.92448	-0.398247	11949,14923,66218,66414,228033	Atp5f1c,Guk1,Ndufb9,Ndufa12,Atp5mc3	5/173
1_Member	GO Biological Processes	GO:0009142	nucleoside triphosphate biosynthetic process	-2.89365	-0.398247	11949,66218,66414,228033	Atp5f1c,Ndufb9,Ndufa12,Atp5mc3	4/103
1_Member	GO Biological Processes	GO:0009260	ribonucleotide biosynthetic process	-2.7958	-0.31405	11949,14923,66218,66414,228033	Atp5f1c,Guk1,Ndufb9,Ndufa12,Atp5mc3	5/185
1_Member	GO Biological Processes	GO:0045333	cellular respiration	-2.73504	-0.274479	11949,12028,14467,66218,66414	Atp5f1c,Bax,Nipsnap2,Ndufb9,Ndufa12	5/191
1_Member	GO Biological Processes	GO:0006119	oxidative phosphorylation	-2.71757	-0.268291	11949,14467,66218,66414	Atp5f1c,Nipsnap2,Ndufb9,Ndufa12	4/115
1_Member	GO Biological Processes	GO:0046390	ribose phosphate biosynthetic process	-2.71528	-0.268291	11949,14923,66218,66414,228033	Atp5f1c,Guk1,Ndufb9,Ndufa12,Atp5mc3	5/193
1_Member	GO Biological Processes	GO:0009144	purine nucleoside triphosphate metabolic process	-2.69576	-0.259882	11949,14923,66218,66414,228033	Atp5f1c,Guk1,Ndufb9,Ndufa12,Atp5mc3	5/195
1_Member	GO Biological Processes	GO:0006164	purine nucleotide biosynthetic process	-2.64796	-0.225303	11949,14923,66218,66414,228033	Atp5f1c,Guk1,Ndufb9,Ndufa12,Atp5mc3	5/200
1_Member	Reactome Gene Sets	R-MMU-1428517	Aerobic respiration and respiratory electron transport	-2.61072	-0.214135	11949,14718,66218,66414,228033	Atp5f1c,Got1,Ndufb9,Ndufa12,Atp5mc3	5/204
1_Member	GO Biological Processes	GO:0072522	purine-containing compound biosynthetic process	-2.58334	-0.204253	11949,14923,66218,66414,228033	Atp5f1c,Guk1,Ndufb9,Ndufa12,Atp5mc3	5/207
1_Member	GO Biological Processes	GO:0042776	proton motive force-driven mitochondrial ATP synthesis	-2.52229	-0.165476	11949,66218,66414	Atp5f1c,Ndufb9,Ndufa12	3/63
1_Member	GO Biological Processes	GO:0006163	purine nucleotide metabolic process	-2.34045	-0.0582695	11949,14923,21881,54683,66218,66414,228033	Atp5f1c,Guk1,Tkt,Prdx5,Ndufb9,Ndufa12,Atp5mc3	7/450
1_Member	GO Biological Processes	GO:0009060	aerobic respiration	-2.22397	0	11949,14467,66218,66414	Atp5f1c,Nipsnap2,Ndufb9,Ndufa12	4/158
1_Member	GO Biological Processes	GO:0006091	generation of precursor metabolites and energy	-2.21595	0	11949,12028,14467,21881,66218,66414	Atp5f1c,Bax,Nipsnap2,Tkt,Ndufb9,Ndufa12	6/359
1_Member	GO Biological Processes	GO:0046034	ATP metabolic process	-2.19547	0	11949,66218,66414,228033	Atp5f1c,Ndufb9,Ndufa12,Atp5mc3	4/161
1_Member	GO Biological Processes	GO:0072521	purine-containing compound metabolic process	-2.17168	0	11949,14923,21881,54683,66218,66414,228033	Atp5f1c,Guk1,Tkt,Prdx5,Ndufb9,Ndufa12,Atp5mc3	7/484
1_Member	GO Biological Processes	GO:0015980	energy derivation by oxidation of organic compounds	-2.15894	0	11949,12028,14467,66218,66414	Atp5f1c,Bax,Nipsnap2,Ndufb9,Ndufa12	5/261
1_Member	KEGG Pathway	mmu05014	Amyotrophic lateral sclerosis - Mus musculus (house mouse)	-2.15403	0	11949,12028,18645,66218,66414,228033	Atp5f1c,Bax,Pfn2,Ndufb9,Ndufa12,Atp5mc3	6/370
1_Member	KEGG Pathway	mmu05020	Prion disease - Mus musculus (house mouse)	-2.11181	0	11949,12028,66218,66414,228033	Atp5f1c,Bax,Ndufb9,Ndufa12,Atp5mc3	5/268
1_Member	KEGG Pathway	mmu05010	Alzheimer disease - Mus musculus (house mouse)	-2.07856	0	11949,20168,66218,66414,68427,228033	Atp5f1c,Rtn3,Ndufb9,Ndufa12,Slc39a13,Atp5mc3	6/384
1_Member	GO Biological Processes	GO:1902600	proton transmembrane transport	-2.07653	0	11949,11972,228033	Atp5f1c,Atp6v0d1,Atp5mc3	3/91
2_Summary	GO Biological Processes	GO:0048284	organelle fusion	-4.44117	-0.564898	12028,20614,22320,66437,67474,228960,13200,19336,76025,78892,105245,18000,18645,20375,11769,11972,13016	Bax,Snap25,Vamp8,Fis1,Snap29,Stx16,Ddost,Rab24,Cant1,Crispld2,Txndc5,Septin2,Pfn2,Spi1,Ap1s1,Atp6v0d1,Ctbp1	17/-
2_Member	GO Biological Processes	GO:0048284	organelle fusion	-4.44117	-0.564898	12028,20614,22320,66437,67474,228960	Bax,Snap25,Vamp8,Fis1,Snap29,Stx16	6/135
2_Member	KEGG Pathway	mmu04130	SNARE interactions in vesicular transport - Mus musculus (house mouse)	-3.34138	-0.534158	22320,67474,228960	Vamp8,Snap29,Stx16	3/33
2_Member	GO Biological Processes	GO:0006906	vesicle fusion	-2.92521	-0.398247	20614,22320,67474,228960	Snap25,Vamp8,Snap29,Stx16	4/101
2_Member	GO Biological Processes	GO:0090174	organelle membrane fusion	-2.89365	-0.398247	20614,22320,67474,228960	Snap25,Vamp8,Snap29,Stx16	4/103
2_Member	Reactome Gene Sets	R-MMU-6798695	Neutrophil degranulation	-2.61694	-0.214366	13200,19336,20614,22320,67474,76025,78892,105245	Ddost,Rab24,Snap25,Vamp8,Snap29,Cant1,Crispld2,Txndc5	8/513
2_Member	GO Biological Processes	GO:0017157	regulation of exocytosis	-2.42841	-0.103297	18000,18645,20375,22320,67474	Septin2,Pfn2,Spi1,Vamp8,Snap29	5/225
2_Member	GO Biological Processes	GO:0016050	vesicle organization	-2.42368	-0.103297	11769,11972,20614,22320,67474,228960	Ap1s1,Atp6v0d1,Snap25,Vamp8,Snap29,Stx16	6/325
2_Member	GO Biological Processes	GO:0061025	membrane fusion	-2.35516	-0.059477	20614,22320,67474,228960	Snap25,Vamp8,Snap29,Stx16	4/145
2_Member	GO Biological Processes	GO:0140056	organelle localization by membrane tethering	-2.27694	-0.0126717	22320,67474,228960	Vamp8,Snap29,Stx16	3/77
2_Member	GO Biological Processes	GO:0099504	synaptic vesicle cycle	-2.23361	0	11972,13016,20614,67474	Atp6v0d1,Ctbp1,Snap25,Snap29	4/157
2_Member	GO Biological Processes	GO:1903305	regulation of regulated secretory pathway	-2.2049	0	18645,20375,22320,67474	Pfn2,Spi1,Vamp8,Snap29	4/160
2_Member	GO Biological Processes	GO:0022406	membrane docking	-2.18646	0	22320,67474,228960	Vamp8,Snap29,Stx16	3/83
2_Member	GO Biological Processes	GO:0099003	vesicle-mediated transport in synapse	-2.06173	0	11972,13016,20614,67474	Atp6v0d1,Ctbp1,Snap25,Snap29	4/176
3_Summary	GO Biological Processes	GO:0071692	protein localization to extracellular region	-4.33528	-0.564898	11769,12845,17965,20614,57320,68151,22320,67474	Ap1s1,Comp,Nbl1,Snap25,Park7,Wls,Vamp8,Snap29	8/-
3_Member	GO Biological Processes	GO:0071692	protein localization to extracellular region	-4.33528	-0.564898	11769,12845,17965,20614,57320,68151	Ap1s1,Comp,Nbl1,Snap25,Park7,Wls	6/141
3_Member	GO Biological Processes	GO:0009306	protein secretion	-3.441	-0.534158	11769,12845,20614,57320,68151	Ap1s1,Comp,Snap25,Park7,Wls	5/133
3_Member	GO Biological Processes	GO:0035592	establishment of protein localization to extracellular region	-3.42604	-0.534158	11769,12845,20614,57320,68151	Ap1s1,Comp,Snap25,Park7,Wls	5/134
3_Member	GO Biological Processes	GO:0032940	secretion by cell	-2.3509	-0.059477	11769,12845,20614,22320,57320,67474,68151	Ap1s1,Comp,Snap25,Vamp8,Park7,Snap29,Wls	7/448
3_Member	GO Biological Processes	GO:0140352	export from cell	-2.03541	0	11769,12845,20614,22320,57320,67474,68151	Ap1s1,Comp,Snap25,Vamp8,Park7,Snap29,Wls	7/514
4_Summary	Reactome Gene Sets	R-MMU-2243919	Crosslinking of collagen fibrils	-4.22274	-0.564898	12842,12843,18542,107581,12845,14580,26561,78892,21825,30955,11972,12028,19054,20340,68151,20351,20375,64817,22320,242083,17926,68427,70804,216440	Col1a1,Col1a2,Pcolce,Col16a1,Comp,Gfap,Mmp23,Crispld2,Thbs1,Pik3cg,Atp6v0d1,Bax,Ppp2r3d,Glg1,Wls,Sema4a,Spi1,Svep1,Vamp8,Ppm1l,Myoc,Slc39a13,Pgrmc2,Os9	24/-
4_Member	Reactome Gene Sets	R-MMU-2243919	Crosslinking of collagen fibrils	-4.22274	-0.564898	12842,12843,18542	Col1a1,Col1a2,Pcolce	3/17
4_Member	Reactome Gene Sets	R-MMU-1650814	Collagen biosynthesis and modifying enzymes	-3.90318	-0.546361	12842,12843,18542,107581	Col1a1,Col1a2,Pcolce,Col16a1	4/56
4_Member	Reactome Gene Sets	R-MMU-216083	Integrin cell surface interactions	-3.5511	-0.536576	12842,12843,12845,107581	Col1a1,Col1a2,Comp,Col16a1	4/69
4_Member	GO Biological Processes	GO:0030198	extracellular matrix organization	-3.54252	-0.536576	12842,12843,12845,14580,26561,78892,107581	Col1a1,Col1a2,Comp,Gfap,Mmp23,Crispld2,Col16a1	7/278
4_Member	GO Biological Processes	GO:0045229	external encapsulating structure organization	-3.53309	-0.536576	12842,12843,12845,14580,26561,78892,107581	Col1a1,Col1a2,Comp,Gfap,Mmp23,Crispld2,Col16a1	7/279
4_Member	Reactome Gene Sets	R-MMU-1474290	Collagen formation	-3.52706	-0.536576	12842,12843,18542,107581	Col1a1,Col1a2,Pcolce,Col16a1	4/70
4_Member	GO Biological Processes	GO:0043062	extracellular structure organization	-3.52369	-0.536576	12842,12843,12845,14580,26561,78892,107581	Col1a1,Col1a2,Comp,Gfap,Mmp23,Crispld2,Col16a1	7/280
4_Member	WikiPathways	WP458	Inflammatory response pathway	-3.46542	-0.534158	12842,12843,21825	Col1a1,Col1a2,Thbs1	3/30
4_Member	Reactome Gene Sets	R-MMU-114604	GPVI-mediated activation cascade	-3.3027	-0.534158	12842,12843,30955	Col1a1,Col1a2,Pik3cg	3/34
4_Member	GO Biological Processes	GO:0060351	cartilage development involved in endochondral bone morphogenesis	-3.1593	-0.444628	12842,12845,21825	Col1a1,Comp,Thbs1	3/38
4_Member	KEGG Pathway	mmu04512	ECM-receptor interaction - Mus musculus (house mouse)	-3.1304	-0.444628	12842,12843,12845,21825	Col1a1,Col1a2,Comp,Thbs1	4/89
4_Member	Reactome Gene Sets	R-MMU-8948216	Collagen chain trimerization	-3.12597	-0.444628	12842,12843,107581	Col1a1,Col1a2,Col16a1	3/39
4_Member	Reactome Gene Sets	R-MMU-3000178	ECM proteoglycans	-3.03122	-0.424533	12842,12843,12845	Col1a1,Col1a2,Comp	3/42
4_Member	Reactome Gene Sets	R-MMU-2022090	Assembly of collagen fibrils and other multimeric structures	-2.91563	-0.398247	12842,12843,18542	Col1a1,Col1a2,Pcolce	3/46
4_Member	KEGG Pathway	mmu05165	Human papillomavirus infection - Mus musculus (house mouse)	-2.8873	-0.398247	11972,12028,12842,12843,12845,19054,21825	Atp6v0d1,Bax,Col1a1,Col1a2,Comp,Ppp2r3d,Thbs1	7/359
4_Member	GO Biological Processes	GO:0060349	bone morphogenesis	-2.78832	-0.313745	12842,12845,20340,21825	Col1a1,Comp,Glg1,Thbs1	4/110
4_Member	GO Biological Processes	GO:0031214	biomineral tissue development	-2.7596	-0.292084	12842,12843,12845,68151	Col1a1,Col1a2,Comp,Wls	4/112
4_Member	GO Biological Processes	GO:0001944	vasculature development	-2.69371	-0.259882	12028,12842,12843,12845,20351,20375,21825,30955,64817	Bax,Col1a1,Col1a2,Comp,Sema4a,Spi1,Thbs1,Pik3cg,Svep1	9/616
4_Member	GO Biological Processes	GO:0030199	collagen fibril organization	-2.64636	-0.225303	12842,12843,12845	Col1a1,Col1a2,Comp	3/57
4_Member	KEGG Pathway	mmu04611	Platelet activation - Mus musculus (house mouse)	-2.58591	-0.204253	12842,12843,22320,30955	Col1a1,Col1a2,Vamp8,Pik3cg	4/125
4_Member	GO Biological Processes	GO:0007178	transmembrane receptor protein serine/threonine kinase signaling pathway	-2.58334	-0.204253	12843,12845,20340,20375,242083	Col1a2,Comp,Glg1,Spi1,Ppm1l	5/207
4_Member	GO Biological Processes	GO:0010812	negative regulation of cell-substrate adhesion	-2.56216	-0.194355	12842,17926,21825	Col1a1,Myoc,Thbs1	3/61
4_Member	GO Biological Processes	GO:0032963	collagen metabolic process	-2.56216	-0.194355	12842,12843,26561	Col1a1,Col1a2,Mmp23	3/61
4_Member	GO Biological Processes	GO:0060348	bone development	-2.44488	-0.10769	12842,12845,17926,20340,21825	Col1a1,Comp,Myoc,Glg1,Thbs1	5/223
4_Member	WikiPathways	WP2841	Focal adhesion PI3K Akt mTOR signaling pathway	-2.44331	-0.10769	12842,12843,12845,19054,21825,30955	Col1a1,Col1a2,Comp,Ppp2r3d,Thbs1,Pik3cg	6/322
4_Member	GO Biological Processes	GO:0060350	endochondral bone morphogenesis	-2.42836	-0.103297	12842,12845,21825	Col1a1,Comp,Thbs1	3/68
4_Member	GO Biological Processes	GO:0001568	blood vessel development	-2.30423	-0.0339573	12028,12842,12843,12845,20351,20375,21825,30955	Bax,Col1a1,Col1a2,Comp,Sema4a,Spi1,Thbs1,Pik3cg	8/578
4_Member	Reactome Gene Sets	R-MMU-1474244	Extracellular matrix organization	-2.30264	-0.0339573	12842,12843,12845,18542,107581	Col1a1,Col1a2,Comp,Pcolce,Col16a1	5/241
4_Member	KEGG Pathway	mmu04151	PI3K-Akt signaling pathway - Mus musculus (house mouse)	-2.1875	0	12842,12843,12845,19054,21825,30955	Col1a1,Col1a2,Comp,Ppp2r3d,Thbs1,Pik3cg	6/364
4_Member	GO Biological Processes	GO:0061448	connective tissue development	-2.17962	0	12842,12845,21825,68427,70804	Col1a1,Comp,Thbs1,Slc39a13,Pgrmc2	5/258
4_Member	GO Biological Processes	GO:0007167	enzyme-linked receptor protein signaling pathway	-2.14675	0	12842,12843,12845,17926,20340,20375,64817,242083	Col1a1,Col1a2,Comp,Myoc,Glg1,Spi1,Svep1,Ppm1l	8/615
4_Member	GO Biological Processes	GO:0006986	response to unfolded protein	-2.00095	0	12845,21825,216440	Comp,Thbs1,Os9	3/97
5_Summary	Reactome Gene Sets	R-MMU-432722	Golgi Associated Vesicle Biogenesis	-4.02959	-0.547842	11769,21985,22320,105245	Ap1s1,Tpd52,Vamp8,Txndc5	4/-
5_Member	Reactome Gene Sets	R-MMU-432722	Golgi Associated Vesicle Biogenesis	-4.02959	-0.547842	11769,21985,22320,105245	Ap1s1,Tpd52,Vamp8,Txndc5	4/52
5_Member	Reactome Gene Sets	R-MMU-199992	trans-Golgi Network Vesicle Budding	-3.57552	-0.536576	11769,21985,22320,105245	Ap1s1,Tpd52,Vamp8,Txndc5	4/68
5_Member	Reactome Gene Sets	R-MMU-432720	Lysosome Vesicle Biogenesis	-3.34138	-0.534158	11769,22320,105245	Ap1s1,Vamp8,Txndc5	3/33
6_Summary	GO Biological Processes	GO:0006334	nucleosome assembly	-3.52706	-0.536576	14957,58243,101685,404634	H1f3,Nap1l5,Spty2d1,Macroh2a2	4/-
6_Member	GO Biological Processes	GO:0006334	nucleosome assembly	-3.52706	-0.536576	14957,58243,101685,404634	H1f3,Nap1l5,Spty2d1,Macroh2a2	4/70
6_Member	GO Biological Processes	GO:0034728	nucleosome organization	-3.1304	-0.444628	14957,58243,101685,404634	H1f3,Nap1l5,Spty2d1,Macroh2a2	4/89
6_Member	GO Biological Processes	GO:0065004	protein-DNA complex assembly	-2.2049	0	14957,58243,101685,404634	H1f3,Nap1l5,Spty2d1,Macroh2a2	4/160
7_Summary	GO Biological Processes	GO:0070972	protein localization to endoplasmic reticulum	-3.43449	-0.534158	11426,66661,216440,433667,17965,57320,12028,12842,66437,404634	Macf1,Srp72,Os9,Ankrd13c,Nbl1,Park7,Bax,Col1a1,Fis1,Macroh2a2	10/-
7_Member	GO Biological Processes	GO:0070972	protein localization to endoplasmic reticulum	-3.43449	-0.534158	11426,66661,216440,433667	Macf1,Srp72,Os9,Ankrd13c	4/74
7_Member	GO Biological Processes	GO:0045185	maintenance of protein location	-2.97388	-0.402305	17965,57320,216440,433667	Nbl1,Park7,Os9,Ankrd13c	4/98
7_Member	GO Biological Processes	GO:0072595	maintenance of protein localization in organelle	-2.97201	-0.402305	57320,216440,433667	Park7,Os9,Ankrd13c	3/44
7_Member	GO Biological Processes	GO:0032507	maintenance of protein location in cell	-2.3585	-0.059477	57320,216440,433667	Park7,Os9,Ankrd13c	3/72
7_Member	GO Biological Processes	GO:0033365	protein localization to organelle	-2.06522	0	11426,12028,12842,57320,66437,66661,216440,404634,433667	Macf1,Bax,Col1a1,Park7,Fis1,Srp72,Os9,Macroh2a2,Ankrd13c	9/770
8_Summary	GO Biological Processes	GO:0043500	muscle adaptation	-3.12597	-0.444628	17926,67092,70430	Myoc,Gatm,Tbce	3/-
8_Member	GO Biological Processes	GO:0043500	muscle adaptation	-3.12597	-0.444628	17926,67092,70430	Myoc,Gatm,Tbce	3/39
9_Summary	GO Biological Processes	GO:0030183	B cell differentiation	-3.08824	-0.432339	12028,16071,20375,20442,21985,67379,16157,20351,13200,433931	Bax,Igkc,Spi1,St3gal1,Tpd52,Dedd2,Il11ra1,Sema4a,Ddost,Pigg	10/-
9_Member	GO Biological Processes	GO:0030183	B cell differentiation	-3.08824	-0.432339	12028,16071,20375,20442,21985	Bax,Igkc,Spi1,St3gal1,Tpd52	5/159
9_Member	GO Biological Processes	GO:0008625	extrinsic apoptotic signaling pathway via death domain receptors	-3.03122	-0.424533	12028,20375,67379	Bax,Spi1,Dedd2	3/42
9_Member	GO Biological Processes	GO:0030098	lymphocyte differentiation	-2.97236	-0.402305	12028,16071,16157,20351,20375,20442,21985	Bax,Igkc,Il11ra1,Sema4a,Spi1,St3gal1,Tpd52	7/347
9_Member	GO Biological Processes	GO:1903131	mononuclear cell differentiation	-2.62745	-0.216076	12028,16071,16157,20351,20375,20442,21985	Bax,Igkc,Il11ra1,Sema4a,Spi1,St3gal1,Tpd52	7/399
9_Member	GO Biological Processes	GO:0042113	B cell activation	-2.38002	-0.0743567	12028,16071,20375,20442,21985	Bax,Igkc,Spi1,St3gal1,Tpd52	5/231
9_Member	GO Biological Processes	GO:0046649	lymphocyte activation	-2.20476	0	12028,13200,16071,16157,20351,20375,20442,21985	Bax,Ddost,Igkc,Il11ra1,Sema4a,Spi1,St3gal1,Tpd52	8/601
9_Member	GO Biological Processes	GO:0002521	leukocyte differentiation	-2.11127	0	12028,16071,16157,20351,20375,20442,21985	Bax,Igkc,Il11ra1,Sema4a,Spi1,St3gal1,Tpd52	7/497
9_Member	GO Biological Processes	GO:0006664	glycolipid metabolic process	-2.05073	0	12028,20442,433931	Bax,St3gal1,Pigg	3/93
9_Member	GO Biological Processes	GO:1903509	liposaccharide metabolic process	-2.03806	0	12028,20442,433931	Bax,St3gal1,Pigg	3/94
10_Summary	GO Biological Processes	GO:0051881	regulation of mitochondrial membrane potential	-3.05878	-0.432339	12028,14718,17926,57320,21825,66437,67379	Bax,Got1,Myoc,Park7,Thbs1,Fis1,Dedd2	7/-
10_Member	GO Biological Processes	GO:0051881	regulation of mitochondrial membrane potential	-3.05878	-0.432339	12028,14718,17926,57320	Bax,Got1,Myoc,Park7	4/93
10_Member	GO Biological Processes	GO:2001235	positive regulation of apoptotic signaling pathway	-2.89136	-0.398247	12028,21825,57320,66437,67379	Bax,Thbs1,Park7,Fis1,Dedd2	5/176
10_Member	GO Biological Processes	GO:2001244	positive regulation of intrinsic apoptotic signaling pathway	-2.3417	-0.0582695	12028,57320,66437	Bax,Park7,Fis1	3/73
11_Summary	GO Biological Processes	GO:0006397	mRNA processing	-2.95567	-0.398247	18789,53861,54188,75062,75956,76938,170791,192196,18542,57320	Papola,Zranb2,Cpsf4,Sf3a3,Srrm2,Rbm17,Rbm39,Luc7l2,Pcolce,Park7	10/-
11_Member	GO Biological Processes	GO:0006397	mRNA processing	-2.95567	-0.398247	18789,53861,54188,75062,75956,76938,170791,192196	Papola,Zranb2,Cpsf4,Sf3a3,Srrm2,Rbm17,Rbm39,Luc7l2	8/453
11_Member	Reactome Gene Sets	R-MMU-72203	Processing of Capped Intron-Containing Pre-mRNA	-2.91629	-0.398247	18789,54188,75062,75956,76938,170791	Papola,Cpsf4,Sf3a3,Srrm2,Rbm17,Rbm39	6/259
11_Member	WikiPathways	WP310	mRNA processing	-2.31459	-0.0369606	18542,18789,54188,57320,75062,76938,170791	Pcolce,Papola,Cpsf4,Park7,Sf3a3,Rbm17,Rbm39	7/455
11_Member	GO Biological Processes	GO:0008380	RNA splicing	-2.17627	0	53861,75062,75956,76938,170791,192196	Zranb2,Sf3a3,Srrm2,Rbm17,Rbm39,Luc7l2	6/366
11_Member	GO Biological Processes	GO:0016071	mRNA metabolic process	-2.13456	0	18789,53861,54188,75062,75956,76938,170791,192196	Papola,Zranb2,Cpsf4,Sf3a3,Srrm2,Rbm17,Rbm39,Luc7l2	8/618
12_Summary	KEGG Pathway	mmu04141	Protein processing in endoplasmic reticulum - Mus musculus (house mouse)	-2.94692	-0.398247	12028,13200,66256,105245,216440	Bax,Ddost,Ssr2,Txndc5,Os9	5/-
12_Member	KEGG Pathway	mmu04141	Protein processing in endoplasmic reticulum - Mus musculus (house mouse)	-2.94692	-0.398247	12028,13200,66256,105245,216440	Bax,Ddost,Ssr2,Txndc5,Os9	5/171
13_Summary	GO Biological Processes	GO:0050922	negative regulation of chemotaxis	-2.62472	-0.216076	17965,20351,21825,11426,18645,30955	Nbl1,Sema4a,Thbs1,Macf1,Pfn2,Pik3cg	6/-
13_Member	GO Biological Processes	GO:0050922	negative regulation of chemotaxis	-2.62472	-0.216076	17965,20351,21825	Nbl1,Sema4a,Thbs1	3/58
13_Member	GO Biological Processes	GO:0010632	regulation of epithelial cell migration	-2.23624	0	11426,18645,20351,21825,30955	Macf1,Pfn2,Sema4a,Thbs1,Pik3cg	5/250
14_Summary	GO Biological Processes	GO:0001952	regulation of cell-matrix adhesion	-2.52447	-0.165476	11426,17926,21825,107581,12842	Macf1,Myoc,Thbs1,Col16a1,Col1a1	5/-
14_Member	GO Biological Processes	GO:0001952	regulation of cell-matrix adhesion	-2.52447	-0.165476	11426,17926,21825,107581	Macf1,Myoc,Thbs1,Col16a1	4/130
14_Member	GO Biological Processes	GO:0051893	regulation of focal adhesion assembly	-2.50287	-0.156777	11426,17926,107581	Macf1,Myoc,Col16a1	3/64
14_Member	GO Biological Processes	GO:0090109	regulation of cell-substrate junction assembly	-2.50287	-0.156777	11426,17926,107581	Macf1,Myoc,Col16a1	3/64
14_Member	GO Biological Processes	GO:0150116	regulation of cell-substrate junction organization	-2.41048	-0.0950566	11426,17926,107581	Macf1,Myoc,Col16a1	3/69
14_Member	GO Biological Processes	GO:0010810	regulation of cell-substrate adhesion	-2.38798	-0.0774638	11426,12842,17926,21825,107581	Macf1,Col1a1,Myoc,Thbs1,Col16a1	5/230
15_Summary	KEGG Pathway	mmu01232	Nucleotide metabolism - Mus musculus (house mouse)	-2.17209	0	14923,76025,110074	Guk1,Cant1,Dut	3/-
15_Member	KEGG Pathway	mmu01232	Nucleotide metabolism - Mus musculus (house mouse)	-2.17209	0	14923,76025,110074	Guk1,Cant1,Dut	3/84
16_Summary	GO Biological Processes	GO:0042147	retrograde transport, endosome to Golgi	-2.17209	0	11769,66964,228960	Ap1s1,Golt1b,Stx16	3/-
16_Member	GO Biological Processes	GO:0042147	retrograde transport, endosome to Golgi	-2.17209	0	11769,66964,228960	Ap1s1,Golt1b,Stx16	3/84
17_Summary	GO Biological Processes	GO:0060322	head development	-2.06174	0	12028,12842,16157,20168,68151,78892,207425,218194,404634	Bax,Col1a1,Il11ra1,Rtn3,Wls,Crispld2,Wdr11,Phactr1,Macroh2a2	9/-
17_Member	GO Biological Processes	GO:0060322	head development	-2.06174	0	12028,12842,16157,20168,68151,78892,207425,218194,404634	Bax,Col1a1,Il11ra1,Rtn3,Wls,Crispld2,Wdr11,Phactr1,Macroh2a2	9/771
18_Summary	GO Biological Processes	GO:0006661	phosphatidylinositol biosynthetic process	-2.01317	0	30955,52858,433931	Pik3cg,Cdipt,Pigg	3/-
18_Member	GO Biological Processes	GO:0006661	phosphatidylinositol biosynthetic process	-2.01317	0	30955,52858,433931	Pik3cg,Cdipt,Pigg	3/96

## Sheet: Annotation downregulation
MyList	Gene ID	Type	Tax ID	Homologene Gene ID	Homologene Gene Tax ID	Gene Symbol	Description	Biological Process (GO)	Kinase Class (UniProt)	GO:1901889 negative regulation of cell ju	GO:0032680 regulation of tumor necrosis f	GO:0002237 response to molecule of bacter	R-MMU-6798695 Neutrophil degranulation	GO:0002685 regulation of leukocyte migrat	mmu04142 Lysosome - Mus musculus (house	mmu04936 Alcoholic liver disease - Mus	GO:0006897 endocytosis	mmu05144 Malaria - Mus musculus (house	GO:0033157 regulation of intracellular pr	GO:2001233 regulation of apoptotic signal	GO:0033365 protein localization to organe	GO:0048872 homeostasis of number of cells	GO:0001952 regulation of cell-matrix adhe	GO:0048168 regulation of neuronal synapti	GO:0071417 cellular response to organonit	R-MMU-556833 Metabolism of lipids	R-MMU-5357905 Regulation of TNFR1 signaling	GO:0000165 MAPK cascade	GO:0019216 regulation of lipid metabolic
Hba-a2	110257	symbol	M. musculus	110257	M. musculus	Hba-a2	hemoglobin alpha, adult chain 2	GO:0048821 erythrocyte development;GO:0061515 myeloid cell development;GO:0030218 erythrocyte differentiation		0	0	0	0	0	0	0	0	1	0	0	0	1	0	0	0	0	0	0	0
Col3a1	12825	symbol	M. musculus	12825	M. musculus	Col3a1	collagen, type III, alpha 1	GO:0032905 transforming growth factor beta1 production;GO:0060414 aorta smooth muscle tissue morphogenesis;GO:0071604 transforming growth factor beta production		0	0	1	0	0	0	0	0	0	0	0	0	1	1	0	1	0	0	0	0
Fuca2	66848	symbol	M. musculus	66848	M. musculus	Fuca2	fucosidase, alpha-L- 2, plasma	GO:2000535 regulation of entry of bacterium into host cell;GO:0006004 fucose metabolic process;GO:0016139 glycoside catabolic process		0	0	0	1	0	1	0	0	0	0	0	0	0	0	0	0	0	0	0	0
Hbb-bs	100503605	symbol	M. musculus	100503605	M. musculus	Hbb-bs	hemoglobin, beta adult s chain			0	0	0	1	0	0	0	0	1	0	0	0	0	0	0	1	0	0	0	0
Cd180	17079	symbol	M. musculus	17079	M. musculus	Cd180	CD180 antigen	GO:0002322 B cell proliferation involved in immune response;GO:0031666 positive regulation of lipopolysaccharide-mediated signaling pathway;GO:0031664 regulation of lipopolysaccharide-mediated signaling pathway		0	1	1	0	0	0	0	0	0	0	0	0	0	0	0	0	0	0	0	0
Plvap	84094	symbol	M. musculus	84094	M. musculus	Plvap	plasmalemma vesicle associated protein	GO:0002693 positive regulation of cellular extravasation;GO:0002691 regulation of cellular extravasation;GO:0043114 regulation of vascular permeability		0	0	0	0	1	0	0	0	0	0	0	0	0	0	0	0	0	1	1	0
Rnf103	22644	symbol	M. musculus	22644	M. musculus	Rnf103	ring finger protein 103	GO:0036503 ERAD pathway;GO:0034976 response to endoplasmic reticulum stress;GO:0010498 proteasomal protein catabolic process		0	0	0	0	0	0	0	0	0	0	0	0	0	0	0	0	0	0	0	0
Pttg1ip	108705	symbol	M. musculus	108705	M. musculus	Pttg1ip	pituitary tumor-transforming 1 interacting protein	GO:0043518 negative regulation of DNA damage response, signal transduction by p53 class mediator;GO:1902254 negative regulation of intrinsic apoptotic signaling pathway by p53 class mediator;GO:1901797 negative regulation of signal transduction by p53 class mediator		0	0	0	0	0	0	0	0	0	0	1	1	0	0	0	0	0	0	0	0
Jtb	23922	symbol	M. musculus	23922	M. musculus	Jtb	jumping translocation breakpoint	GO:0008637 apoptotic mitochondrial changes;GO:0000281 mitotic cytokinesis;GO:0061640 cytoskeleton-dependent cytokinesis		0	0	0	0	0	0	0	0	0	0	0	0	0	0	0	0	0	0	0	0
Ace	11421	symbol	M. musculus	11421	M. musculus	Ace	angiotensin I converting enzyme	GO:1903597 negative regulation of gap junction assembly;GO:2000170 positive regulation of peptidyl-cysteine S-nitrosylation;GO:0010814 substance P catabolic process		1	0	1	0	0	0	1	0	0	0	0	0	0	0	1	1	0	0	0	0
Ostf1	20409	symbol	M. musculus	20409	M. musculus	Ostf1	osteoclast stimulating factor 1	GO:0007165 signal transduction;GO:0023052 signaling;GO:0007154 cell communication		0	0	0	1	0	0	0	0	0	0	0	0	0	0	0	0	0	0	0	0
Rabggta	56187	symbol	M. musculus	56187	M. musculus	Rabggta	Rab geranylgeranyl transferase, a subunit	GO:0018344 protein geranylgeranylation;GO:0018342 protein prenylation;GO:0097354 prenylation		0	0	0	0	0	0	0	0	0	0	0	0	0	0	0	0	0	0	0	0
Sumo1	22218	symbol	M. musculus	22218	M. musculus	Sumo1	small ubiquitin-like modifier 1	GO:0010621 negative regulation of transcription by transcription factor localization;GO:0090204 protein localization to nuclear pore;GO:1901896 positive regulation of ATPase-coupled calcium transmembrane transporter activity		1	0	0	0	0	0	1	0	0	1	1	1	0	0	0	0	0	0	0	0
Necap1	67602	symbol	M. musculus	67602	M. musculus	Necap1	NECAP endocytosis associated 1	GO:0140238 presynaptic endocytosis;GO:0099003 vesicle-mediated transport in synapse;GO:0006897 endocytosis		0	0	0	0	0	0	0	1	0	0	0	0	0	0	0	0	0	0	0	0
Pabpn1	54196	symbol	M. musculus	54196	M. musculus	Pabpn1	poly(A) binding protein, nuclear 1	GO:1904247 positive regulation of polynucleotide adenylyltransferase activity;GO:1904245 regulation of polynucleotide adenylyltransferase activity;GO:0031440 regulation of mRNA 3'-end processing		0	0	1	0	0	0	1	0	0	0	0	0	0	0	0	0	0	0	1	0
Cd14	12475	symbol	M. musculus	12475	M. musculus	Cd14	CD14 antigen	GO:0071725 response to triacyl bacterial lipopeptide;GO:0071727 cellular response to triacyl bacterial lipopeptide;GO:0071724 response to diacyl bacterial lipopeptide		0	1	1	1	0	0	1	1	0	0	0	0	1	0	0	0	0	1	0	0
Suds3	71954	symbol	M. musculus	71954	M. musculus	Suds3	suppressor of defective silencing 3 homolog (S. cerevisiae)	GO:1902455 negative regulation of stem cell population maintenance;GO:0001835 blastocyst hatching;GO:0035188 hatching		0	0	0	0	0	0	0	0	0	0	0	0	0	1	0	0	0	0	0	0
Ninj1	18081	symbol	M. musculus	18081	M. musculus	Ninj1	ninjurin 1	GO:1905351 pericyte cell migration;GO:2001206 positive regulation of osteoclast development;GO:0002232 leukocyte chemotaxis involved in inflammatory response		0	1	1	0	1	0	0	0	0	0	0	0	0	1	0	0	0	0	0	0
Hexa	15211	symbol	M. musculus	15211	M. musculus	Hexa	hexosaminidase A	GO:0030209 dermatan sulfate catabolic process;GO:0006689 ganglioside catabolic process;GO:0030205 dermatan sulfate metabolic process		0	0	0	0	0	1	0	0	0	0	0	0	0	0	0	0	1	0	0	0
Sh3tc1	231147	symbol	M. musculus	231147	M. musculus	Sh3tc1	SH3 domain and tetratricopeptide repeats 1	GO:0008150 biological_process		0	0	0	0	0	0	0	0	0	0	0	0	0	0	0	0	0	0	0	0
Nfasc	269116	symbol	M. musculus	269116	M. musculus	Nfasc	neurofascin	GO:0002175 protein localization to paranode region of axon;GO:0071205 protein localization to juxtaparanode region of axon;GO:0030913 paranodal junction assembly		0	0	0	1	0	0	0	0	0	0	0	0	0	1	0	0	0	0	0	0
Akt3	23797	symbol	M. musculus	23797	M. musculus	Akt3	thymoma viral proto-oncogene 3	GO:1905653 positive regulation of artery morphogenesis;GO:1905651 regulation of artery morphogenesis;GO:0045793 positive regulation of cell size	yes	0	0	1	0	1	0	1	0	0	0	0	0	1	1	0	1	0	0	0	0
Arhgap1	228359	symbol	M. musculus	228359	M. musculus	Arhgap1	Rho GTPase activating protein 1	GO:2001136 negative regulation of endocytic recycling;GO:0033572 transferrin transport;GO:2001135 regulation of endocytic recycling		1	1	0	0	0	0	0	0	0	1	0	0	0	0	0	0	0	0	1	0
Tlr2	24088	symbol	M. musculus	24088	M. musculus	Tlr2	toll-like receptor 2	GO:0038124 toll-like receptor TLR6:TLR2 signaling pathway;GO:0042495 detection of triacyl bacterial lipopeptide;GO:0042496 detection of diacyl bacterial lipopeptide		1	1	1	1	1	0	1	0	1	1	0	0	0	0	0	1	0	0	1	0
Tra2a	101214	symbol	M. musculus	101214	M. musculus	Tra2a	transformer 2 alpha	GO:0048026 positive regulation of mRNA splicing, via spliceosome;GO:0050685 positive regulation of mRNA processing;GO:0033120 positive regulation of RNA splicing		0	0	0	0	0	0	1	0	0	0	0	0	0	0	0	0	0	0	0	0
Iqsec1	232227	symbol	M. musculus	232227	M. musculus	Iqsec1	IQ motif and Sec7 domain 1	GO:0120182 regulation of focal adhesion disassembly;GO:0120183 positive regulation of focal adhesion disassembly;GO:0051549 positive regulation of keratinocyte migration		1	1	0	0	1	0	0	0	0	0	0	0	0	0	1	0	0	0	0	0
Tmem43	74122	symbol	M. musculus	74122	M. musculus	Tmem43	transmembrane protein 43	GO:0071763 nuclear membrane organization;GO:0006998 nuclear envelope organization;GO:0006997 nucleus organization		0	0	0	0	0	0	0	0	0	0	0	0	0	0	0	0	0	0	0	0
H2afj	232440	gene_synonym	M. musculus	232440	M. musculus	H2aj	H2J.A histone	GO:0070828 heterochromatin organization;GO:0006338 chromatin remodeling;GO:0006325 chromatin organization		0	0	0	0	0	0	0	0	0	0	0	0	0	0	0	1	0	1	0	0
Spns2	216892	symbol	M. musculus	216892	M. musculus	Spns2	SPNS lysolipid transporter 2, sphingosine-1-phosphate	GO:0048073 regulation of eye pigmentation;GO:0003376 sphingosine-1-phosphate receptor signaling pathway;GO:0090520 sphingolipid mediated signaling pathway		0	0	0	0	1	1	0	0	0	0	0	0	1	0	0	0	1	0	0	0
Mnt	17428	symbol	M. musculus	17428	M. musculus	Mnt	max binding protein	GO:0090398 cellular senescence;GO:2001234 negative regulation of apoptotic signaling pathway;GO:2001233 regulation of apoptotic signaling pathway		0	0	0	0	0	0	0	0	0	0	1	0	0	0	0	0	0	0	0	0
Srrm1	51796	symbol	M. musculus	51796	M. musculus	Srrm1	serine/arginine repetitive matrix 1	GO:0048024 regulation of mRNA splicing, via spliceosome;GO:0050684 regulation of mRNA processing;GO:0043484 regulation of RNA splicing		0	0	0	0	0	0	0	0	0	0	0	0	0	0	0	0	0	0	0	0
Apod	11815	symbol	M. musculus	11815	M. musculus	Apod	apolipoprotein D	GO:0034443 negative regulation of lipoprotein oxidation;GO:0060588 negative regulation of lipoprotein lipid oxidation;GO:0034442 regulation of lipoprotein oxidation		1	0	0	0	1	0	0	0	0	1	0	0	0	1	0	0	0	0	0	1
Cd68	12514	symbol	M. musculus	12514	M. musculus	Cd68	CD68 antigen	GO:0002605 negative regulation of dendritic cell antigen processing and presentation;GO:0002578 negative regulation of antigen processing and presentation;GO:0035425 autocrine signaling		0	1	1	1	0	1	0	0	0	0	0	1	0	0	0	0	0	0	0	0
Fabp5	16592	symbol	M. musculus	16592	M. musculus	Fabp5	fatty acid binding protein 5, epidermal	GO:0099178 regulation of retrograde trans-synaptic signaling by endocanabinoid;GO:0035360 positive regulation of peroxisome proliferator activated receptor signaling pathway;GO:0031392 regulation of prostaglandin biosynthetic process		1	0	0	1	0	0	0	0	0	0	0	0	0	0	1	0	1	0	0	1
Tnfrsf1a	21937	symbol	M. musculus	21937	M. musculus	Tnfrsf1a	tumor necrosis factor receptor superfamily, member 1a	GO:0003332 negative regulation of extracellular matrix constituent secretion;GO:1902339 positive regulation of apoptotic process involved in morphogenesis;GO:1904747 positive regulation of apoptotic process involved in development		1	1	0	0	0	0	1	0	0	1	1	0	0	0	0	1	1	1	0	1
Cd47	16423	symbol	M. musculus	16423	M. musculus	Cd47	CD47 antigen (Rh-related antigen, integrin-associated signal transducer)	GO:0008228 opsonization;GO:1904669 ATP export;GO:2000439 positive regulation of monocyte extravasation		1	1	0	1	1	0	0	0	0	0	0	0	1	0	0	0	0	0	0	0
Avp	11998	symbol	M. musculus	11998	M. musculus	Avp	arginine vasopressin	GO:0002125 maternal aggressive behavior;GO:0007621 negative regulation of female receptivity;GO:0032849 positive regulation of cellular pH reduction		1	0	0	0	0	0	0	0	0	0	1	0	1	0	0	0	0	0	1	1
Rbck1	24105	symbol	M. musculus	24105	M. musculus	Rbck1	RanBP-type and C3HC4-type zinc finger containing 1	GO:0097039 protein linear polyubiquitination;GO:0060546 negative regulation of necroptotic process;GO:0051220 cytoplasmic sequestering of protein		0	0	1	0	0	0	0	0	0	0	1	0	0	0	0	0	0	1	0	0
Tbc1d22a	223754	symbol	M. musculus	223754	M. musculus	Tbc1d22a	TBC1 domain family, member 22a	GO:0090630 activation of GTPase activity;GO:0043547 positive regulation of GTPase activity;GO:0043087 regulation of GTPase activity		0	0	0	0	0	0	0	0	0	0	0	0	0	0	0	0	0	0	0	0
Fcgr2b	14130	symbol	M. musculus	14130	M. musculus	Fcgr2b	Fc receptor, IgG, low affinity IIb	GO:0001811 negative regulation of type I hypersensitivity;GO:0002884 negative regulation of hypersensitivity;GO:0002434 immune complex clearance		1	1	1	1	0	0	1	1	0	0	1	0	0	1	1	1	0	0	0	0
Mcl1	17210	symbol	M. musculus	17210	M. musculus	Mcl1	myeloid cell leukemia sequence 1	GO:1903378 positive regulation of oxidative stress-induced neuron intrinsic apoptotic signaling pathway;GO:1902177 positive regulation of oxidative stress-induced intrinsic apoptotic signaling pathway;GO:2000811 negative regulation of anoikis		0	0	0	0	0	0	0	0	0	0	1	0	0	0	0	0	0	1	0	0
Polr2j	20022	symbol	M. musculus	20022	M. musculus	Polr2j	polymerase (RNA) II (DNA directed) polypeptide J	GO:0006366 transcription by RNA polymerase II;GO:0006351 DNA-templated transcription;GO:0032774 RNA biosynthetic process		0	0	0	0	0	0	0	0	0	0	0	0	0	0	0	0	0	0	0	0
Syn1	20964	symbol	M. musculus	20964	M. musculus	Syn1	synapsin I	GO:0097091 synaptic vesicle clustering;GO:0098693 regulation of synaptic vesicle cycle;GO:0048172 regulation of short-term neuronal synaptic plasticity		0	1	0	0	0	0	0	0	0	0	0	0	0	0	1	0	0	0	0	0
Neurl3	214854	symbol	M. musculus	214854	M. musculus	Neurl3	neuralized E3 ubiquitin protein ligase 3	GO:0070086 ubiquitin-dependent endocytosis;GO:0072594 establishment of protein localization to organelle;GO:0006897 endocytosis		0	0	0	0	0	0	0	1	0	0	0	1	0	0	0	0	0	0	0	0
Kif1a	16560	symbol	M. musculus	16560	M. musculus	Kif1a	kinesin family member 1A	GO:1990048 anterograde neuronal dense core vesicle transport;GO:1990049 retrograde neuronal dense core vesicle transport;GO:0099519 dense core granule cytoskeletal transport		0	0	0	0	0	0	0	0	0	0	0	0	0	1	0	0	0	0	0	0
Mapkapk2	17164	symbol	M. musculus	17164	M. musculus	Mapkapk2	MAP kinase-activated protein kinase 2	GO:0044351 macropinocytosis;GO:0006907 pinocytosis;GO:0038066 p38MAPK cascade	yes	0	1	1	0	0	0	1	1	0	0	0	0	0	0	0	1	1	1	1	0
Mpc2	70456	symbol	M. musculus	70456	M. musculus	Mpc2	mitochondrial pyruvate carrier 2	GO:0006850 mitochondrial pyruvate transmembrane transport;GO:1901475 pyruvate transmembrane transport;GO:0006848 pyruvate transport		0	0	0	0	0	0	0	0	0	1	0	0	0	0	0	1	1	0	0	0
Crat	12908	symbol	M. musculus	12908	M. musculus	Crat	carnitine acetyltransferase	GO:0019254 carnitine metabolic process, CoA-linked;GO:0033540 fatty acid beta-oxidation using acyl-CoA oxidase;GO:0009437 carnitine metabolic process		0	0	0	0	0	0	0	0	0	0	0	0	0	0	0	0	1	0	0	0
Immp1l	66541	symbol	M. musculus	66541	M. musculus	Immp1l	IMP1 inner mitochondrial membrane peptidase-like (S. cerevisiae)	GO:0006627 protein processing involved in protein targeting to mitochondrion;GO:0034982 mitochondrial protein processing;GO:0006465 signal peptide processing		0	0	0	0	0	0	0	0	0	0	0	1	0	0	0	0	0	0	0	0
Npepl1	228961	symbol	M. musculus	228961	M. musculus	Npepl1	aminopeptidase-like 1	GO:0006508 proteolysis;GO:0019538 protein metabolic process;GO:1901564 organonitrogen compound metabolic process		0	0	0	0	0	0	0	0	0	0	0	0	0	0	0	0	0	0	0	0
Cdc42se1	57912	symbol	M. musculus	57912	M. musculus	Cdc42se1	CDC42 small effector 1	GO:0046329 negative regulation of JNK cascade;GO:0035023 regulation of Rho protein signal transduction;GO:0008360 regulation of cell shape		0	0	0	0	0	0	0	1	0	0	0	0	0	0	0	0	0	0	1	0
Lamtor5	68576	symbol	M. musculus	68576	M. musculus	Lamtor5	late endosomal/lysosomal adaptor, MAPK and MTOR activator 5	GO:1905636 positive regulation of RNA polymerase II regulatory region sequence-specific DNA binding;GO:1903025 regulation of RNA polymerase II regulatory region sequence-specific DNA binding;GO:0038202 TORC1 signaling		0	1	1	0	0	0	0	0	0	1	0	1	0	0	0	1	0	1	0	0
Dbt	13171	symbol	M. musculus	13171	M. musculus	Dbt	dihydrolipoamide branched chain transacylase E2	GO:0009083 branched-chain amino acid catabolic process;GO:0009081 branched-chain amino acid metabolic process;GO:0009063 amino acid catabolic process		0	0	0	0	0	0	0	0	0	0	0	0	0	0	0	0	0	0	0	0
Chmp5	76959	symbol	M. musculus	76959	M. musculus	Chmp5	charged multivesicular body protein 5	GO:0071225 cellular response to muramyl dipeptide;GO:0046761 viral budding from plasma membrane;GO:0051469 vesicle fusion with vacuole		0	0	1	0	0	0	0	0	0	0	0	0	1	0	0	1	0	1	0	0
Hacd4	66775	symbol	M. musculus	66775	M. musculus	Hacd4	3-hydroxyacyl-CoA dehydratase 4	GO:0042761 very long-chain fatty acid biosynthetic process;GO:0030497 fatty acid elongation;GO:0000038 very long-chain fatty acid metabolic process		0	0	0	0	0	0	0	0	0	0	0	0	0	0	0	0	1	0	0	0
Pde4b	18578	symbol	M. musculus	18578	M. musculus	Pde4b	phosphodiesterase 4B, cAMP specific	GO:1901898 negative regulation of relaxation of cardiac muscle;GO:0071878 negative regulation of adenylate cyclase-activating adrenergic receptor signaling pathway;GO:1901078 negative regulation of relaxation of muscle		0	1	1	0	1	0	0	0	0	0	1	0	1	0	0	0	0	0	1	0
Ube4b	63958	symbol	M. musculus	63958	M. musculus	Ube4b	ubiquitination factor E4B	GO:0008626 granzyme-mediated apoptotic signaling pathway;GO:0140507 granzyme-mediated programmed cell death signaling pathway;GO:0003222 ventricular trabecula myocardium morphogenesis		0	0	0	0	0	0	0	0	0	0	1	0	0	0	0	0	0	0	0	0
Cpeb2	231207	symbol	M. musculus	231207	M. musculus	Cpeb2	cytoplasmic polyadenylation element binding protein 2	GO:1900248 negative regulation of cytoplasmic translational elongation;GO:1900247 regulation of cytoplasmic translational elongation;GO:0045900 negative regulation of translational elongation		0	0	0	0	0	0	0	0	0	0	0	0	0	0	1	1	0	0	0	0
Coro1c	23790	symbol	M. musculus	23790	M. musculus	Coro1c	coronin, actin binding protein 1C	GO:0000147 actin cortical patch assembly;GO:0044396 actin cortical patch organization;GO:0097750 endosome membrane tubulation		1	0	0	0	0	0	0	1	0	0	0	0	0	1	0	0	0	0	0	0
Coq5	52064	symbol	M. musculus	52064	M. musculus	Coq5	coenzyme Q5 methyltransferase	GO:0006744 ubiquinone biosynthetic process;GO:1901663 quinone biosynthetic process;GO:0006743 ubiquinone metabolic process		0	0	0	0	0	0	0	0	0	0	0	0	0	0	0	0	0	0	0	0
Castor2	80909	symbol	M. musculus	80909	M. musculus	Castor2	cytosolic arginine sensor for mTORC1 subunit 2	GO:1903576 response to L-arginine;GO:1903577 cellular response to L-arginine;GO:1904262 negative regulation of TORC1 signaling		0	0	0	0	0	0	0	0	0	0	0	0	0	0	0	1	0	0	0	0
Rnf216	108086	symbol	M. musculus	108086	M. musculus	Rnf216	ring finger protein 216	GO:0099546 protein catabolic process, modulating synaptic transmission;GO:0140246 protein catabolic process at synapse;GO:0099149 regulation of postsynaptic neurotransmitter receptor internalization		0	1	1	0	0	0	0	0	0	0	0	0	0	0	0	0	0	0	0	0
Pon3	269823	symbol	M. musculus	269823	M. musculus	Pon3	paraoxonase 3	GO:0010124 phenylacetate catabolic process;GO:0046226 coumarin catabolic process;GO:0046271 phenylpropanoid catabolic process		0	0	0	0	0	0	0	0	0	0	0	0	0	0	0	0	1	0	0	0
M6pr	17113	symbol	M. musculus	17113	M. musculus	M6pr	mannose-6-phosphate receptor, cation dependent	GO:0033299 secretion of lysosomal enzymes;GO:0006622 protein targeting to lysosome;GO:0006623 protein targeting to vacuole		0	0	0	0	0	1	1	0	0	0	0	1	0	0	0	0	1	0	0	0
Rras	20130	symbol	M. musculus	20130	M. musculus	Rras	related RAS viral (r-ras) oncogene	GO:0036135 Schwann cell migration;GO:1900148 negative regulation of Schwann cell migration;GO:1904906 positive regulation of endothelial cell-matrix adhesion via fibronectin		0	0	0	0	1	0	1	0	0	0	0	0	0	1	0	0	0	0	0	0
Kdelr1	68137	symbol	M. musculus	68137	M. musculus	Kdelr1	KDEL (Lys-Asp-Glu-Leu) endoplasmic reticulum protein retention receptor 1	GO:0006621 protein retention in ER lumen;GO:0035437 maintenance of protein localization in endoplasmic reticulum;GO:0002369 T cell cytokine production		0	0	1	0	0	0	0	0	0	0	0	1	0	0	0	0	0	0	0	0
Ctxn1	330695	symbol	M. musculus	330695	M. musculus	Ctxn1	cortexin 1	GO:0008150 biological_process		0	0	0	0	0	0	0	0	0	0	0	0	0	0	0	0	0	0	0	0
Hgsnat	52120	symbol	M. musculus	52120	M. musculus	Hgsnat	heparan-alpha-glucosaminide N-acetyltransferase	GO:0030200 heparan sulfate proteoglycan catabolic process;GO:0030167 proteoglycan catabolic process;GO:0006516 glycoprotein catabolic process		0	0	0	1	0	1	0	0	0	0	0	0	0	0	0	0	0	0	0	0
Zdhhc2	70546	symbol	M. musculus	70546	M. musculus	Zdhhc2	zinc finger, DHHC domain containing 2	GO:1905751 positive regulation of endosome to plasma membrane protein transport;GO:1901628 positive regulation of postsynaptic membrane organization;GO:1904719 positive regulation of AMPA glutamate receptor clustering		0	1	0	0	0	0	0	0	0	1	0	0	0	0	1	0	0	0	0	0
Ccr2	12772	symbol	M. musculus	12772	M. musculus	Ccr2	C-C motif chemokine receptor 2	GO:0035705 T-helper 17 cell chemotaxis;GO:0043310 negative regulation of eosinophil degranulation;GO:2000464 positive regulation of astrocyte chemotaxis		1	1	0	0	1	0	0	1	0	0	0	0	1	0	1	0	0	0	1	0
Ctdsp2	52468	symbol	M. musculus	52468	M. musculus	Ctdsp2	CTD small phosphatase 2	GO:2000134 negative regulation of G1/S transition of mitotic cell cycle;GO:1902807 negative regulation of cell cycle G1/S phase transition;GO:0006470 protein dephosphorylation		0	0	0	0	0	0	0	0	0	0	0	0	0	0	0	0	0	0	0	0
Pdlim4	30794	symbol	M. musculus	30794	M. musculus	Pdlim4	PDZ and LIM domain 4	GO:0098976 excitatory chemical synaptic transmission;GO:0051496 positive regulation of stress fiber assembly;GO:0032233 positive regulation of actin filament bundle assembly		0	0	0	0	0	0	0	0	0	0	0	0	0	0	0	0	0	0	0	0
Slc36a1	215335	symbol	M. musculus	215335	M. musculus	Slc36a1	solute carrier family 36 (proton/amino acid symporter), member 1	GO:0015734 taurine transport;GO:0042918 alkanesulfonate transport;GO:0035524 proline transmembrane transport		0	0	0	0	0	0	0	1	0	0	0	0	0	0	0	0	0	0	0	0
Plekhh3	217198	symbol	M. musculus	217198	M. musculus	Plekhh3	pleckstrin homology domain containing, family H (with MyTH4 domain) member 3	GO:0007165 signal transduction;GO:0023052 signaling;GO:0007154 cell communication		0	0	0	0	0	0	0	0	0	0	0	0	0	0	0	0	0	0	0	0
Cep131	12009	symbol	M. musculus	12009	M. musculus	Cep131	centrosomal protein 131	GO:1990953 intramanchette transport;GO:0035735 intraciliary transport involved in cilium assembly;GO:1905198 manchette assembly		0	0	0	0	0	0	0	0	0	1	0	1	0	0	0	0	0	0	0	0
Ndufaf8	208501	symbol	M. musculus	208501	M. musculus	Ndufaf8	NADH:ubiquinone oxidoreductase complex assembly factor 8	GO:0010257 NADH dehydrogenase complex assembly;GO:0032981 mitochondrial respiratory chain complex I assembly;GO:0033108 mitochondrial respiratory chain complex assembly		0	0	0	0	0	0	0	0	0	0	0	0	0	0	0	0	0	0	0	0
Lhfpl2	218454	symbol	M. musculus	218454	M. musculus	Lhfpl2	lipoma HMGIC fusion partner-like 2	GO:1905516 positive regulation of fertilization;GO:0080154 regulation of fertilization;GO:2000243 positive regulation of reproductive process		0	0	0	0	0	0	0	0	0	0	0	0	0	0	0	0	0	0	0	0
Selenok	80795	symbol	M. musculus	80795	M. musculus	Selenok	selenoprotein K	GO:0045728 respiratory burst after phagocytosis;GO:0010742 macrophage derived foam cell differentiation;GO:0002679 respiratory burst involved in defense response		0	1	1	0	1	0	0	0	0	1	1	0	0	0	0	0	0	0	0	0
Timm23	53600	symbol	M. musculus	53600	M. musculus	Timm23	translocase of inner mitochondrial membrane 23	GO:0030150 protein import into mitochondrial matrix;GO:0010954 positive regulation of protein processing;GO:1903319 positive regulation of protein maturation		0	0	0	0	0	0	0	0	0	0	0	1	0	0	0	0	0	0	0	0
Rad21	19357	symbol	M. musculus	19357	M. musculus	Rad21	RAD21 cohesin complex component	GO:0140588 chromatin looping;GO:1990414 replication-born double-strand break repair via sister chromatid exchange;GO:0034351 negative regulation of glial cell apoptotic process		1	1	0	0	0	0	0	0	0	0	1	1	0	0	0	0	0	0	0	0
Cebpd	12609	symbol	M. musculus	12609	M. musculus	Cebpd	CCAAT/enhancer binding protein delta	GO:0045669 positive regulation of osteoblast differentiation;GO:0045444 fat cell differentiation;GO:0002244 hematopoietic progenitor cell differentiation		0	0	0	0	0	0	0	0	0	0	0	0	0	0	0	0	0	0	0	0
Gsk3b	56637	symbol	M. musculus	56637	M. musculus	Gsk3b	glycogen synthase kinase 3 beta	GO:0045886 negative regulation of synaptic assembly at neuromuscular junction;GO:0071109 superior temporal gyrus development;GO:0150101 regulation of microtubule anchoring at centrosome	yes	1	0	1	0	0	0	1	0	0	1	1	1	0	1	1	1	0	0	1	0
Boc	117606	symbol	M. musculus	117606	M. musculus	Boc	BOC cell adhesion associated, oncogene regulated	GO:0016202 regulation of striated muscle tissue development;GO:0048634 regulation of muscle organ development;GO:0045663 positive regulation of myoblast differentiation		0	0	0	0	0	0	0	0	0	0	0	0	0	1	0	0	0	0	0	0
Sik1	17691	symbol	M. musculus	17691	M. musculus	Sik1	salt inducible kinase 1	GO:0010868 negative regulation of triglyceride biosynthetic process;GO:0032792 negative regulation of CREB transcription factor activity;GO:2000210 positive regulation of anoikis	yes	0	0	0	0	0	0	0	0	0	0	0	0	0	0	0	0	0	0	0	1
Map4k2	26412	symbol	M. musculus	26412	M. musculus	Map4k2	mitogen-activated protein kinase kinase kinase kinase 2	GO:0043507 positive regulation of JUN kinase activity;GO:0006903 vesicle targeting;GO:0043506 regulation of JUN kinase activity	yes	0	0	0	0	0	0	1	0	0	0	0	0	0	0	0	0	0	0	0	0
Fabp4	11770	symbol	M. musculus	11770	M. musculus	Fabp4	fatty acid binding protein 4, adipocyte	GO:0071285 cellular response to lithium ion;GO:0010226 response to lithium ion;GO:0050872 white fat cell differentiation		0	1	1	0	0	0	0	0	0	0	0	0	0	0	0	0	1	1	0	0
Sdc1	20969	symbol	M. musculus	20969	M. musculus	Sdc1	syndecan 1	GO:0048627 myoblast development;GO:1903553 positive regulation of extracellular exosome assembly;GO:1903551 regulation of extracellular exosome assembly		0	1	0	0	0	0	1	1	1	0	0	0	0	0	0	0	0	0	0	0
Pgls	66171	symbol	M. musculus	66171	M. musculus	Pgls	6-phosphogluconolactonase	GO:0009051 pentose-phosphate shunt, oxidative branch;GO:0006098 pentose-phosphate shunt;GO:0006740 NADPH regeneration		0	0	0	0	0	0	0	0	0	0	0	0	0	0	0	0	0	0	0	0
Tnxb	81877	symbol	M. musculus	81877	M. musculus	Tnxb	tenascin XB	GO:1904028 positive regulation of collagen fibril organization;GO:1904026 regulation of collagen fibril organization;GO:0048251 elastic fiber assembly		0	0	0	0	0	0	0	0	0	0	0	0	0	0	0	0	1	0	0	0
Sod1	20655	symbol	M. musculus	20655	M. musculus	Sod1	superoxide dismutase 1, soluble	GO:0045541 negative regulation of cholesterol biosynthetic process;GO:0106119 negative regulation of sterol biosynthetic process;GO:0099610 action potential initiation		0	1	0	0	0	0	0	0	0	0	1	0	1	0	0	1	0	0	0	1
Tchh	99681	symbol	M. musculus	99681	M. musculus	Tchh	trichohyalin	GO:0045109 intermediate filament organization;GO:0045104 intermediate filament cytoskeleton organization;GO:0045103 intermediate filament-based process		0	0	0	0	0	0	0	0	0	0	0	0	0	1	0	0	0	0	0	0
Mrc2	17534	symbol	M. musculus	17534	M. musculus	Mrc2	mannose receptor, C type 2	GO:0030574 collagen catabolic process;GO:0032963 collagen metabolic process;GO:0006897 endocytosis		0	0	0	0	0	0	1	1	0	0	0	0	0	0	0	0	0	0	0	0
Dkk3	50781	symbol	M. musculus	50781	M. musculus	Dkk3	dickkopf WNT signaling pathway inhibitor 3	GO:0032345 negative regulation of aldosterone metabolic process;GO:0032348 negative regulation of aldosterone biosynthetic process;GO:2000065 negative regulation of cortisol biosynthetic process		0	0	0	0	0	0	0	0	0	0	0	0	0	0	0	0	0	0	0	1
Rexo2	104444	symbol	M. musculus	104444	M. musculus	Rexo2	RNA exonuclease 2	GO:0006139 nucleobase-containing compound metabolic process;GO:0046483 heterocycle metabolic process;GO:0006725 cellular aromatic compound metabolic process		0	0	0	0	0	0	0	0	0	0	0	0	0	0	0	0	0	0	0	0
Skil	20482	symbol	M. musculus	20482	M. musculus	Skil	SKI-like	GO:1902231 positive regulation of intrinsic apoptotic signaling pathway in response to DNA damage;GO:1902043 positive regulation of extrinsic apoptotic signaling pathway via death domain receptors;GO:0070306 lens fiber cell differentiation		0	0	0	0	0	0	0	0	0	0	1	0	1	0	0	0	0	0	0	0
Gpx7	67305	symbol	M. musculus	67305	M. musculus	Gpx7	glutathione peroxidase 7	GO:0006979 response to oxidative stress;GO:0006950 response to stress;GO:0050896 response to stimulus		0	0	0	0	0	0	0	0	0	0	0	0	0	0	0	1	0	0	0	0
Arsa	11883	symbol	M. musculus	11883	M. musculus	Arsa	arylsulfatase A	GO:0051597 response to methylmercury;GO:0009268 response to pH;GO:0007339 binding of sperm to zona pellucida		0	0	0	1	0	1	0	0	0	0	0	0	0	0	0	0	1	0	0	0
Eif3a	13669	symbol	M. musculus	13669	M. musculus	Eif3a	eukaryotic translation initiation factor 3, subunit A	GO:0002188 translation reinitiation;GO:0001732 formation of cytoplasmic translation initiation complex;GO:0075525 viral translational termination-reinitiation		0	0	0	0	0	0	0	0	0	0	0	0	0	0	0	0	0	0	0	0
Fbxo6	50762	symbol	M. musculus	50762	M. musculus	Fbxo6	F-box protein 6	GO:0006516 glycoprotein catabolic process;GO:0031146 SCF-dependent proteasomal ubiquitin-dependent protein catabolic process;GO:0036503 ERAD pathway		0	0	0	0	0	0	0	0	0	0	0	0	0	0	0	0	0	0	0	0
Irf3	54131	symbol	M. musculus	54131	M. musculus	Irf3	interferon regulatory factor 3	GO:0035666 TRIF-dependent toll-like receptor signaling pathway;GO:0002756 MyD88-independent toll-like receptor signaling pathway;GO:0032606 type I interferon production		0	1	1	0	0	0	1	0	0	0	0	0	0	0	0	0	0	1	0	0

## Sheet: Enrichment downregulation
GroupID	Category	Term	Description	LogP	Log(q-value)	Genes	Symbols	InTerm_InList
1_Summary	GO Biological Processes	GO:1901889	negative regulation of cell junction assembly	-6.19799	-2.3183	11421,11815,23790,24088,56637,12772,14130,16423,16592,21937,22218,228359,11998,19357,232227	Ace,Apod,Coro1c,Tlr2,Gsk3b,Ccr2,Fcgr2b,Cd47,Fabp5,Tnfrsf1a,Sumo1,Arhgap1,Avp,Rad21,Iqsec1	15/-
1_Member	GO Biological Processes	GO:1901889	negative regulation of cell junction assembly	-6.19799	-2.3183	11421,11815,23790,24088,56637	Ace,Apod,Coro1c,Tlr2,Gsk3b	5/36
1_Member	GO Biological Processes	GO:0051051	negative regulation of transport	-4.00154	-1.02836	11421,11815,12772,14130,16423,16592,21937,22218,24088,228359	Ace,Apod,Ccr2,Fcgr2b,Cd47,Fabp5,Tnfrsf1a,Sumo1,Tlr2,Arhgap1	10/497
1_Member	GO Biological Processes	GO:0051129	negative regulation of cellular component organization	-2.47889	-0.215485	11421,11815,11998,14130,16423,19357,21937,23790,24088,56637	Ace,Apod,Avp,Fcgr2b,Cd47,Rad21,Tnfrsf1a,Coro1c,Tlr2,Gsk3b	10/784
1_Member	GO Biological Processes	GO:0150116	regulation of cell-substrate junction organization	-2.39798	-0.191151	11815,23790,232227	Apod,Coro1c,Iqsec1	3/69
1_Member	GO Biological Processes	GO:1901888	regulation of cell junction assembly	-2.23935	-0.116162	11421,11815,23790,24088,56637	Ace,Apod,Coro1c,Tlr2,Gsk3b	5/247
2_Summary	GO Biological Processes	GO:0032680	regulation of tumor necrosis factor production	-6.15109	-2.3183	12475,12772,14130,16423,17164,19357,21937,24088,80795,18578,20655,54131,68576,20964,20969,70546,108086,228359,232227,11770,18081,12514,17079	Cd14,Ccr2,Fcgr2b,Cd47,Mapkapk2,Rad21,Tnfrsf1a,Tlr2,Selenok,Pde4b,Sod1,Irf3,Lamtor5,Syn1,Sdc1,Zdhhc2,Rnf216,Arhgap1,Iqsec1,Fabp4,Ninj1,Cd68,Cd180	23/-
2_Member	GO Biological Processes	GO:0032680	regulation of tumor necrosis factor production	-6.15109	-2.3183	12475,12772,14130,16423,17164,19357,21937,24088,80795	Cd14,Ccr2,Fcgr2b,Cd47,Mapkapk2,Rad21,Tnfrsf1a,Tlr2,Selenok	9/216
2_Member	GO Biological Processes	GO:1903555	regulation of tumor necrosis factor superfamily cytokine production	-6.10108	-2.3183	12475,12772,14130,16423,17164,19357,21937,24088,80795	Cd14,Ccr2,Fcgr2b,Cd47,Mapkapk2,Rad21,Tnfrsf1a,Tlr2,Selenok	9/219
2_Member	GO Biological Processes	GO:0032760	positive regulation of tumor necrosis factor production	-5.36881	-1.97181	12475,12772,14130,17164,21937,24088,80795	Cd14,Ccr2,Fcgr2b,Mapkapk2,Tnfrsf1a,Tlr2,Selenok	7/142
2_Member	GO Biological Processes	GO:1903557	positive regulation of tumor necrosis factor superfamily cytokine production	-5.32863	-1.97181	12475,12772,14130,17164,21937,24088,80795	Cd14,Ccr2,Fcgr2b,Mapkapk2,Tnfrsf1a,Tlr2,Selenok	7/144
2_Member	GO Biological Processes	GO:0001819	positive regulation of cytokine production	-4.98577	-1.71278	12475,12772,14130,17164,18578,19357,20655,21937,24088,54131,68576,80795	Cd14,Ccr2,Fcgr2b,Mapkapk2,Pde4b,Rad21,Sod1,Tnfrsf1a,Tlr2,Irf3,Lamtor5,Selenok	12/560
2_Member	GO Biological Processes	GO:0060627	regulation of vesicle-mediated transport	-4.60403	-1.4233	12475,12772,14130,16423,20655,20964,20969,24088,70546,108086,228359,232227	Cd14,Ccr2,Fcgr2b,Cd47,Sod1,Syn1,Sdc1,Tlr2,Zdhhc2,Rnf216,Arhgap1,Iqsec1	12/612
2_Member	GO Biological Processes	GO:0050727	regulation of inflammatory response	-3.92155	-0.986101	11770,12772,14130,16423,18081,20655,21937,24088,54131	Fabp4,Ccr2,Fcgr2b,Cd47,Ninj1,Sod1,Tnfrsf1a,Tlr2,Irf3	9/411
2_Member	GO Biological Processes	GO:0050729	positive regulation of inflammatory response	-3.90358	-0.986101	11770,12772,16423,18081,21937,24088	Fabp4,Ccr2,Cd47,Ninj1,Tnfrsf1a,Tlr2	6/167
2_Member	GO Biological Processes	GO:0050765	negative regulation of phagocytosis	-3.69187	-0.879123	14130,16423,24088	Fcgr2b,Cd47,Tlr2	3/25
2_Member	GO Biological Processes	GO:0032653	regulation of interleukin-10 production	-3.66015	-0.874503	14130,16423,19357,24088	Fcgr2b,Cd47,Rad21,Tlr2	4/64
2_Member	GO Biological Processes	GO:0006954	inflammatory response	-3.62587	-0.857331	12475,12514,12772,14130,16423,17079,17164,18081,21937,24088	Cd14,Cd68,Ccr2,Fcgr2b,Cd47,Cd180,Mapkapk2,Ninj1,Tnfrsf1a,Tlr2	10/553
2_Member	GO Biological Processes	GO:0031349	positive regulation of defense response	-3.48914	-0.773304	11770,12475,12772,16423,17164,18081,21937,24088,54131	Fabp4,Cd14,Ccr2,Cd47,Mapkapk2,Ninj1,Tnfrsf1a,Tlr2,Irf3	9/470
2_Member	GO Biological Processes	GO:0032103	positive regulation of response to external stimulus	-3.22465	-0.654947	11770,12475,12772,16423,17079,17164,18081,21937,24088,54131	Fabp4,Cd14,Ccr2,Cd47,Cd180,Mapkapk2,Ninj1,Tnfrsf1a,Tlr2,Irf3	10/622
2_Member	GO Biological Processes	GO:0030100	regulation of endocytosis	-3.00479	-0.487203	12475,14130,16423,20655,24088,108086,232227	Cd14,Fcgr2b,Cd47,Sod1,Tlr2,Rnf216,Iqsec1	7/339
2_Member	GO Biological Processes	GO:0032675	regulation of interleukin-6 production	-2.90456	-0.442215	16423,17164,21937,24088,80795	Cd47,Mapkapk2,Tnfrsf1a,Tlr2,Selenok	5/173
2_Member	GO Biological Processes	GO:0050764	regulation of phagocytosis	-2.59509	-0.289429	14130,16423,20655,24088	Fcgr2b,Cd47,Sod1,Tlr2	4/123
2_Member	GO Biological Processes	GO:0045806	negative regulation of endocytosis	-2.36308	-0.171366	14130,16423,24088	Fcgr2b,Cd47,Tlr2	3/71
2_Member	GO Biological Processes	GO:0050766	positive regulation of phagocytosis	-2.06436	-0.0166391	14130,16423,20655	Fcgr2b,Cd47,Sod1	3/91
3_Summary	GO Biological Processes	GO:0002237	response to molecule of bacterial origin	-5.5936	-1.98825	11421,12475,12514,14130,17079,17164,18578,24088,54131,54196,76959,56637,11770,12825,68137,23797,24105,68576,108086,18081,80795	Ace,Cd14,Cd68,Fcgr2b,Cd180,Mapkapk2,Pde4b,Tlr2,Irf3,Pabpn1,Chmp5,Gsk3b,Fabp4,Col3a1,Kdelr1,Akt3,Rbck1,Lamtor5,Rnf216,Ninj1,Selenok	21/-
3_Member	GO Biological Processes	GO:0002237	response to molecule of bacterial origin	-5.5936	-1.98825	11421,12475,12514,14130,17079,17164,18578,24088,54131,54196,76959	Ace,Cd14,Cd68,Fcgr2b,Cd180,Mapkapk2,Pde4b,Tlr2,Irf3,Pabpn1,Chmp5	11/403
3_Member	GO Biological Processes	GO:0071216	cellular response to biotic stimulus	-5.54918	-1.98825	12475,12514,14130,17079,18578,24088,54131,54196,56637,76959	Cd14,Cd68,Fcgr2b,Cd180,Pde4b,Tlr2,Irf3,Pabpn1,Gsk3b,Chmp5	10/328
3_Member	GO Biological Processes	GO:0071219	cellular response to molecule of bacterial origin	-4.97268	-1.71278	12475,12514,14130,17079,18578,24088,54131,54196,76959	Cd14,Cd68,Fcgr2b,Cd180,Pde4b,Tlr2,Irf3,Pabpn1,Chmp5	9/301
3_Member	GO Biological Processes	GO:0001816	cytokine production	-4.204	-1.14822	11770,12825,14130,17164,24088,54131,68137	Fabp4,Col3a1,Fcgr2b,Mapkapk2,Tlr2,Irf3,Kdelr1	7/215
3_Member	GO Biological Processes	GO:0032496	response to lipopolysaccharide	-4.15423	-1.12477	11421,12475,12514,17079,17164,18578,54131,54196,76959	Ace,Cd14,Cd68,Cd180,Mapkapk2,Pde4b,Irf3,Pabpn1,Chmp5	9/383
3_Member	GO Biological Processes	GO:0071222	cellular response to lipopolysaccharide	-3.39577	-0.710436	12475,12514,17079,18578,54131,54196,76959	Cd14,Cd68,Cd180,Pde4b,Irf3,Pabpn1,Chmp5	7/291
3_Member	Reactome Gene Sets	R-MMU-168898	Toll-like Receptor Cascades	-3.30427	-0.676217	12475,17079,17164,24088,54131	Cd14,Cd180,Mapkapk2,Tlr2,Irf3	5/141
3_Member	GO Biological Processes	GO:0002224	toll-like receptor signaling pathway	-3.01832	-0.490807	17164,24088,54131	Mapkapk2,Tlr2,Irf3	3/42
3_Member	GO Biological Processes	GO:0140895	cell surface toll-like receptor signaling pathway	-2.95914	-0.470084	12475,24088,54131	Cd14,Tlr2,Irf3	3/44
3_Member	KEGG Pathway	mmu04620	Toll-like receptor signaling pathway - Mus musculus (house mouse)	-2.86164	-0.426792	12475,23797,24088,54131	Cd14,Akt3,Tlr2,Irf3	4/104
3_Member	GO Biological Processes	GO:0002752	cell surface pattern recognition receptor signaling pathway	-2.849	-0.424273	12475,24088,54131	Cd14,Tlr2,Irf3	3/48
3_Member	Reactome Gene Sets	R-MMU-166016	Toll Like Receptor 4 (TLR4) Cascade	-2.74324	-0.373119	12475,17079,17164,54131	Cd14,Cd180,Mapkapk2,Irf3	4/112
3_Member	GO Biological Processes	GO:0002757	immune response-activating signaling pathway	-2.63049	-0.300006	12475,17164,18578,24088,24105,54131	Cd14,Mapkapk2,Pde4b,Tlr2,Rbck1,Irf3	6/292
3_Member	GO Biological Processes	GO:0032757	positive regulation of interleukin-8 production	-2.61206	-0.297731	12475,24088,68576	Cd14,Tlr2,Lamtor5	3/58
3_Member	GO Biological Processes	GO:0002221	pattern recognition receptor signaling pathway	-2.58237	-0.283269	12475,17164,24088,54131	Cd14,Mapkapk2,Tlr2,Irf3	4/124
3_Member	GO Biological Processes	GO:0002220	innate immune response activating cell surface receptor signaling pathway	-2.57	-0.282986	12475,24088,54131	Cd14,Tlr2,Irf3	3/60
3_Member	GO Biological Processes	GO:0002764	immune response-regulating signaling pathway	-2.53674	-0.254555	12475,17164,18578,24088,24105,54131	Cd14,Mapkapk2,Pde4b,Tlr2,Rbck1,Irf3	6/305
3_Member	GO Biological Processes	GO:0002429	immune response-activating cell surface receptor signaling pathway	-2.45079	-0.215485	12475,18578,24088,24105,54131	Cd14,Pde4b,Tlr2,Rbck1,Irf3	5/220
3_Member	GO Biological Processes	GO:0002758	innate immune response-activating signaling pathway	-2.44967	-0.215485	12475,17164,24088,54131	Cd14,Mapkapk2,Tlr2,Irf3	4/135
3_Member	GO Biological Processes	GO:0032479	regulation of type I interferon production	-2.43822	-0.215485	12475,24088,54131,108086	Cd14,Tlr2,Irf3,Rnf216	4/136
3_Member	GO Biological Processes	GO:0002367	cytokine production involved in immune response	-2.434	-0.215485	17164,24088,68137	Mapkapk2,Tlr2,Kdelr1	3/67
3_Member	GO Biological Processes	GO:0002768	immune response-regulating cell surface receptor signaling pathway	-2.35316	-0.169243	12475,18578,24088,24105,54131	Cd14,Pde4b,Tlr2,Rbck1,Irf3	5/232
3_Member	GO Biological Processes	GO:0032648	regulation of interferon-beta production	-2.34604	-0.168922	24088,54131,108086	Tlr2,Irf3,Rnf216	3/72
3_Member	GO Biological Processes	GO:0032677	regulation of interleukin-8 production	-2.29643	-0.138794	12475,24088,68576	Cd14,Tlr2,Lamtor5	3/75
3_Member	GO Biological Processes	GO:0002831	regulation of response to biotic stimulus	-2.25106	-0.120544	12475,17079,17164,18081,24088,54131,80795,108086	Cd14,Cd180,Mapkapk2,Ninj1,Tlr2,Irf3,Selenok,Rnf216	8/584
3_Member	GO Biological Processes	GO:0002833	positive regulation of response to biotic stimulus	-2.2003	-0.0834105	12475,17079,17164,18081,24088,54131	Cd14,Cd180,Mapkapk2,Ninj1,Tlr2,Irf3	6/358
3_Member	GO Biological Processes	GO:0071396	cellular response to lipid	-2.16166	-0.0672263	12475,12514,17079,18578,54131,54196,56637,76959	Cd14,Cd68,Cd180,Pde4b,Irf3,Pabpn1,Gsk3b,Chmp5	8/605
3_Member	GO Biological Processes	GO:0032481	positive regulation of type I interferon production	-2.13166	-0.0592758	12475,24088,54131	Cd14,Tlr2,Irf3	3/86
3_Member	GO Biological Processes	GO:0002253	activation of immune response	-2.04194	-0.00475062	12475,17164,18578,24088,24105,54131	Cd14,Mapkapk2,Pde4b,Tlr2,Rbck1,Irf3	6/387
3_Member	GO Biological Processes	GO:0002218	activation of innate immune response	-2.02961	0	12475,17164,24088,54131	Cd14,Mapkapk2,Tlr2,Irf3	4/178
3_Member	Reactome Gene Sets	R-MMU-166166	MyD88-independent TLR4 cascade	-2.00107	0	12475,17164,54131	Cd14,Mapkapk2,Irf3	3/96
3_Member	Reactome Gene Sets	R-MMU-937061	TRIF (TICAM1)-mediated TLR4 signaling	-2.00107	0	12475,17164,54131	Cd14,Mapkapk2,Irf3	3/96
4_Summary	Reactome Gene Sets	R-MMU-6798695	Neutrophil degranulation	-5.37022	-1.97181	11883,12475,12514,14130,16423,16592,20409,24088,52120,66848,269116,100503605	Arsa,Cd14,Cd68,Fcgr2b,Cd47,Fabp5,Ostf1,Tlr2,Hgsnat,Fuca2,Nfasc,Hbb-bs	12/-
4_Member	Reactome Gene Sets	R-MMU-6798695	Neutrophil degranulation	-5.37022	-1.97181	11883,12475,12514,14130,16423,16592,20409,24088,52120,66848,269116,100503605	Arsa,Cd14,Cd68,Fcgr2b,Cd47,Fabp5,Ostf1,Tlr2,Hgsnat,Fuca2,Nfasc,Hbb-bs	12/513
5_Summary	GO Biological Processes	GO:0002685	regulation of leukocyte migration	-4.64562	-1.42711	11815,12772,16423,18081,24088,80795,84094,216892,18578,20130,23797,232227	Apod,Ccr2,Cd47,Ninj1,Tlr2,Selenok,Plvap,Spns2,Pde4b,Rras,Akt3,Iqsec1	12/-
5_Member	GO Biological Processes	GO:0002685	regulation of leukocyte migration	-4.64562	-1.42711	11815,12772,16423,18081,24088,80795,84094,216892	Apod,Ccr2,Cd47,Ninj1,Tlr2,Selenok,Plvap,Spns2	8/253
5_Member	GO Biological Processes	GO:0071675	regulation of mononuclear cell migration	-4.4524	-1.30644	11815,12772,16423,18081,80795,216892	Apod,Ccr2,Cd47,Ninj1,Selenok,Spns2	6/133
5_Member	GO Biological Processes	GO:2000404	regulation of T cell migration	-4.04551	-1.04088	11815,12772,80795,216892	Apod,Ccr2,Selenok,Spns2	4/51
5_Member	GO Biological Processes	GO:0002693	positive regulation of cellular extravasation	-3.80247	-0.922779	12772,16423,84094	Ccr2,Cd47,Plvap	3/23
5_Member	GO Biological Processes	GO:2000401	regulation of lymphocyte migration	-3.60847	-0.853716	11815,12772,80795,216892	Apod,Ccr2,Selenok,Spns2	4/66
5_Member	GO Biological Processes	GO:0097529	myeloid leukocyte migration	-3.24894	-0.670277	12772,18081,18578,24088,80795	Ccr2,Ninj1,Pde4b,Tlr2,Selenok	5/145
5_Member	GO Biological Processes	GO:0050900	leukocyte migration	-2.99892	-0.487203	12772,18081,18578,24088,80795,216892	Ccr2,Ninj1,Pde4b,Tlr2,Selenok,Spns2	6/247
5_Member	GO Biological Processes	GO:0002687	positive regulation of leukocyte migration	-2.83908	-0.424273	12772,16423,24088,80795,84094	Ccr2,Cd47,Tlr2,Selenok,Plvap	5/179
5_Member	GO Biological Processes	GO:0002691	regulation of cellular extravasation	-2.82301	-0.414361	12772,16423,84094	Ccr2,Cd47,Plvap	3/49
5_Member	GO Biological Processes	GO:0072676	lymphocyte migration	-2.38039	-0.177395	12772,80795,216892	Ccr2,Selenok,Spns2	3/70
5_Member	GO Biological Processes	GO:0071677	positive regulation of mononuclear cell migration	-2.15981	-0.0672263	12772,16423,80795	Ccr2,Cd47,Selenok	3/84
5_Member	GO Biological Processes	GO:0030335	positive regulation of cell migration	-2.141	-0.059758	12772,16423,20130,23797,24088,80795,84094,232227	Ccr2,Cd47,Rras,Akt3,Tlr2,Selenok,Plvap,Iqsec1	8/610
5_Member	GO Biological Processes	GO:1990266	neutrophil migration	-2.06436	-0.0166391	18578,24088,80795	Pde4b,Tlr2,Selenok	3/91
5_Member	GO Biological Processes	GO:2000147	positive regulation of cell motility	-2.02572	0	12772,16423,20130,23797,24088,80795,84094,232227	Ccr2,Cd47,Rras,Akt3,Tlr2,Selenok,Plvap,Iqsec1	8/639
6_Summary	KEGG Pathway	mmu04142	Lysosome - Mus musculus (house mouse)	-4.41598	-1.3022	11883,12514,15211,17113,52120,66848,216892	Arsa,Cd68,Hexa,M6pr,Hgsnat,Fuca2,Spns2	7/-
6_Member	KEGG Pathway	mmu04142	Lysosome - Mus musculus (house mouse)	-4.41598	-1.3022	11883,12514,15211,17113,52120,66848	Arsa,Cd68,Hexa,M6pr,Hgsnat,Fuca2	6/135
6_Member	Reactome Gene Sets	R-MMU-9840310	Glycosphingolipid catabolism	-3.36828	-0.710436	11883,15211,17113	Arsa,Hexa,M6pr	3/32
6_Member	Reactome Gene Sets	R-MMU-428157	Sphingolipid metabolism	-3.09547	-0.540462	11883,15211,17113,216892	Arsa,Hexa,M6pr,Spns2	4/90
6_Member	Reactome Gene Sets	R-MMU-1660662	Glycosphingolipid metabolism	-2.7727	-0.387854	11883,15211,17113	Arsa,Hexa,M6pr	3/51
7_Summary	KEGG Pathway	mmu04936	Alcoholic liver disease - Mus musculus (house mouse)	-4.3102	-1.22638	12475,21937,23797,54131,56637,101214,14130,17534,24088,17113,20130,11421,17164,26412,20969,22218,54196	Cd14,Tnfrsf1a,Akt3,Irf3,Gsk3b,Tra2a,Fcgr2b,Mrc2,Tlr2,M6pr,Rras,Ace,Mapkapk2,Map4k2,Sdc1,Sumo1,Pabpn1	17/-
7_Member	KEGG Pathway	mmu04936	Alcoholic liver disease - Mus musculus (house mouse)	-4.3102	-1.22638	12475,21937,23797,54131,56637,101214	Cd14,Tnfrsf1a,Akt3,Irf3,Gsk3b,Tra2a	6/141
7_Member	KEGG Pathway	mmu05152	Tuberculosis - Mus musculus (house mouse)	-3.72622	-0.897678	12475,14130,17534,21937,23797,24088	Cd14,Fcgr2b,Mrc2,Tnfrsf1a,Akt3,Tlr2	6/180
7_Member	KEGG Pathway	mmu05417	Lipid and atherosclerosis - Mus musculus (house mouse)	-3.30265	-0.676217	12475,21937,23797,24088,54131,56637	Cd14,Tnfrsf1a,Akt3,Tlr2,Irf3,Gsk3b	6/216
7_Member	KEGG Pathway	mmu05162	Measles - Mus musculus (house mouse)	-3.24894	-0.670277	14130,23797,24088,54131,56637	Fcgr2b,Akt3,Tlr2,Irf3,Gsk3b	5/145
7_Member	KEGG Pathway	mmu05132	Salmonella infection - Mus musculus (house mouse)	-2.96302	-0.470084	12475,17113,20130,21937,23797,24088	Cd14,M6pr,Rras,Tnfrsf1a,Akt3,Tlr2	6/251
7_Member	KEGG Pathway	mmu05142	Chagas disease - Mus musculus (house mouse)	-2.87715	-0.43016	11421,21937,23797,24088	Ace,Tnfrsf1a,Akt3,Tlr2	4/103
7_Member	KEGG Pathway	mmu04145	Phagosome - Mus musculus (house mouse)	-2.83908	-0.424273	12475,14130,17113,17534,24088	Cd14,Fcgr2b,M6pr,Mrc2,Tlr2	5/179
7_Member	KEGG Pathway	mmu04010	MAPK signaling pathway - Mus musculus (house mouse)	-2.57939	-0.283269	12475,17164,20130,21937,23797,26412	Cd14,Mapkapk2,Rras,Tnfrsf1a,Akt3,Map4k2	6/299
7_Member	KEGG Pathway	mmu05167	Kaposi sarcoma-associated herpesvirus infection - Mus musculus (house mouse)	-2.44241	-0.215485	17164,21937,23797,54131,56637	Mapkapk2,Tnfrsf1a,Akt3,Irf3,Gsk3b	5/221
7_Member	KEGG Pathway	mmu05418	Fluid shear stress and atherosclerosis - Mus musculus (house mouse)	-2.31831	-0.151831	20969,21937,22218,23797	Sdc1,Tnfrsf1a,Sumo1,Akt3	4/147
7_Member	KEGG Pathway	mmu04662	B cell receptor signaling pathway - Mus musculus (house mouse)	-2.17417	-0.0672263	14130,23797,56637	Fcgr2b,Akt3,Gsk3b	3/83
7_Member	KEGG Pathway	mmu05160	Hepatitis C - Mus musculus (house mouse)	-2.13382	-0.0592758	21937,23797,54131,56637	Tnfrsf1a,Akt3,Irf3,Gsk3b	4/166
7_Member	KEGG Pathway	mmu05164	Influenza A - Mus musculus (house mouse)	-2.07199	-0.0166391	21937,23797,54131,54196	Tnfrsf1a,Akt3,Irf3,Pabpn1	4/173
8_Summary	GO Biological Processes	GO:0006897	endocytosis	-3.98723	-1.02836	12475,12772,14130,17164,17534,20969,23790,57912,67602,214854,215335	Cd14,Ccr2,Fcgr2b,Mapkapk2,Mrc2,Sdc1,Coro1c,Cdc42se1,Necap1,Neurl3,Slc36a1	11/-
8_Member	GO Biological Processes	GO:0006897	endocytosis	-3.98723	-1.02836	12475,12772,14130,17164,17534,20969,23790,57912,67602,214854	Cd14,Ccr2,Fcgr2b,Mapkapk2,Mrc2,Sdc1,Coro1c,Cdc42se1,Necap1,Neurl3	10/499
8_Member	GO Biological Processes	GO:0098657	import into cell	-3.51997	-0.791549	12475,12772,14130,17164,17534,20969,23790,57912,67602,214854,215335	Cd14,Ccr2,Fcgr2b,Mapkapk2,Mrc2,Sdc1,Coro1c,Cdc42se1,Necap1,Neurl3,Slc36a1	11/681
8_Member	GO Biological Processes	GO:0006909	phagocytosis	-2.25719	-0.121139	12772,14130,23790,57912	Ccr2,Fcgr2b,Coro1c,Cdc42se1	4/153
9_Summary	KEGG Pathway	mmu05144	Malaria - Mus musculus (house mouse)	-3.85586	-0.957681	20969,24088,110257,100503605	Sdc1,Tlr2,Hba-a2,Hbb-bs	4/-
9_Member	KEGG Pathway	mmu05144	Malaria - Mus musculus (house mouse)	-3.85586	-0.957681	20969,24088,110257,100503605	Sdc1,Tlr2,Hba-a2,Hbb-bs	4/57
10_Summary	GO Biological Processes	GO:0033157	regulation of intracellular protein transport	-3.76583	-0.903865	11815,12009,21937,22218,56637,70546,228359,24088,70456,80795,68576	Apod,Cep131,Tnfrsf1a,Sumo1,Gsk3b,Zdhhc2,Arhgap1,Tlr2,Mpc2,Selenok,Lamtor5	11/-
10_Member	GO Biological Processes	GO:0033157	regulation of intracellular protein transport	-3.76583	-0.903865	11815,12009,21937,22218,56637,70546	Apod,Cep131,Tnfrsf1a,Sumo1,Gsk3b,Zdhhc2	6/177
10_Member	GO Biological Processes	GO:0032386	regulation of intracellular transport	-3.37797	-0.710436	11815,12009,21937,22218,56637,70546,228359	Apod,Cep131,Tnfrsf1a,Sumo1,Gsk3b,Zdhhc2,Arhgap1	7/293
10_Member	GO Biological Processes	GO:0051223	regulation of protein transport	-3.07953	-0.535634	11815,12009,21937,22218,24088,56637,70456,70546,80795	Apod,Cep131,Tnfrsf1a,Sumo1,Tlr2,Gsk3b,Mpc2,Zdhhc2,Selenok	9/536
10_Member	GO Biological Processes	GO:1900180	regulation of protein localization to nucleus	-2.98435	-0.480322	11815,21937,22218,56637,68576	Apod,Tnfrsf1a,Sumo1,Gsk3b,Lamtor5	5/166
10_Member	GO Biological Processes	GO:1900181	negative regulation of protein localization to nucleus	-2.90278	-0.442215	11815,22218,56637	Apod,Sumo1,Gsk3b	3/46
10_Member	GO Biological Processes	GO:0090316	positive regulation of intracellular protein transport	-2.75752	-0.378428	12009,21937,56637,70546	Cep131,Tnfrsf1a,Gsk3b,Zdhhc2	4/111
10_Member	GO Biological Processes	GO:0032387	negative regulation of intracellular transport	-2.65571	-0.317806	11815,22218,228359	Apod,Sumo1,Arhgap1	3/56
10_Member	GO Biological Processes	GO:0070201	regulation of establishment of protein localization	-2.65343	-0.317806	11815,12009,21937,22218,24088,56637,70456,70546,80795	Apod,Cep131,Tnfrsf1a,Sumo1,Tlr2,Gsk3b,Mpc2,Zdhhc2,Selenok	9/618
10_Member	GO Biological Processes	GO:0051222	positive regulation of protein transport	-2.50887	-0.240195	12009,21937,24088,56637,70456,70546	Cep131,Tnfrsf1a,Tlr2,Gsk3b,Mpc2,Zdhhc2	6/309
10_Member	GO Biological Processes	GO:0046822	regulation of nucleocytoplasmic transport	-2.44967	-0.215485	11815,21937,22218,56637	Apod,Tnfrsf1a,Sumo1,Gsk3b	4/135
10_Member	GO Biological Processes	GO:0032388	positive regulation of intracellular transport	-2.26718	-0.127854	12009,21937,56637,70546	Cep131,Tnfrsf1a,Gsk3b,Zdhhc2	4/152
10_Member	GO Biological Processes	GO:0042306	regulation of protein import into nucleus	-2.21843	-0.0984009	11815,21937,22218	Apod,Tnfrsf1a,Sumo1	3/80
10_Member	GO Biological Processes	GO:1904951	positive regulation of establishment of protein localization	-2.16621	-0.0672263	12009,21937,24088,56637,70456,70546	Cep131,Tnfrsf1a,Tlr2,Gsk3b,Mpc2,Zdhhc2	6/364
11_Summary	GO Biological Processes	GO:2001233	regulation of apoptotic signaling pathway	-3.72953	-0.897678	11998,14130,17210,17428,20482,20655,24105,56637,108705,21937,80795,19357,63958,18578,22218	Avp,Fcgr2b,Mcl1,Mnt,Skil,Sod1,Rbck1,Gsk3b,Pttg1ip,Tnfrsf1a,Selenok,Rad21,Ube4b,Pde4b,Sumo1	15/-
11_Member	GO Biological Processes	GO:2001233	regulation of apoptotic signaling pathway	-3.72953	-0.897678	11998,14130,17210,17428,20482,20655,24105,56637,108705	Avp,Fcgr2b,Mcl1,Mnt,Skil,Sod1,Rbck1,Gsk3b,Pttg1ip	9/436
11_Member	GO Biological Processes	GO:0097193	intrinsic apoptotic signaling pathway	-2.7354	-0.373119	17210,20482,21937,56637,80795	Mcl1,Skil,Tnfrsf1a,Gsk3b,Selenok	5/189
11_Member	GO Biological Processes	GO:2001242	regulation of intrinsic apoptotic signaling pathway	-2.68592	-0.339832	14130,17210,20482,20655,108705	Fcgr2b,Mcl1,Skil,Sod1,Pttg1ip	5/194
11_Member	GO Biological Processes	GO:0097191	extrinsic apoptotic signaling pathway	-2.62089	-0.297731	17210,20482,21937,56637	Mcl1,Skil,Tnfrsf1a,Gsk3b	4/121
11_Member	GO Biological Processes	GO:0043523	regulation of neuron apoptotic process	-2.4345	-0.215485	14130,17210,19357,20655,21937,56637	Fcgr2b,Mcl1,Rad21,Sod1,Tnfrsf1a,Gsk3b	6/320
11_Member	GO Biological Processes	GO:2001244	positive regulation of intrinsic apoptotic signaling pathway	-2.32926	-0.159257	17210,20482,20655	Mcl1,Skil,Sod1	3/73
11_Member	GO Biological Processes	GO:0097190	apoptotic signaling pathway	-2.29489	-0.138794	17210,20482,21937,56637,63958,80795	Mcl1,Skil,Tnfrsf1a,Gsk3b,Ube4b,Selenok	6/342
11_Member	GO Biological Processes	GO:2001234	negative regulation of apoptotic signaling pathway	-2.19615	-0.0823745	11998,17210,17428,56637,108705	Avp,Mcl1,Mnt,Gsk3b,Pttg1ip	5/253
11_Member	GO Biological Processes	GO:0008630	intrinsic apoptotic signaling pathway in response to DNA damage	-2.17417	-0.0672263	17210,20482,21937	Mcl1,Skil,Tnfrsf1a	3/83
11_Member	GO Biological Processes	GO:0090257	regulation of muscle system process	-2.11341	-0.0438402	18578,20655,21937,22218,56637	Pde4b,Sod1,Tnfrsf1a,Sumo1,Gsk3b	5/265
11_Member	GO Biological Processes	GO:2001236	regulation of extrinsic apoptotic signaling pathway	-2.10695	-0.0401728	17210,20482,24105,56637	Mcl1,Skil,Rbck1,Gsk3b	4/169
11_Member	GO Biological Processes	GO:2001235	positive regulation of apoptotic signaling pathway	-2.04639	-0.00659234	17210,20482,20655,24105	Mcl1,Skil,Sod1,Rbck1	4/176
12_Summary	GO Biological Processes	GO:0033365	protein localization to organelle	-3.65729	-0.874503	12009,12514,17113,19357,22218,53600,56637,66541,68137,68576,108705,214854	Cep131,Cd68,M6pr,Rad21,Sumo1,Timm23,Gsk3b,Immp1l,Kdelr1,Lamtor5,Pttg1ip,Neurl3	12/-
12_Member	GO Biological Processes	GO:0033365	protein localization to organelle	-3.65729	-0.874503	12009,12514,17113,19357,22218,53600,56637,66541,68137,68576,108705,214854	Cep131,Cd68,M6pr,Rad21,Sumo1,Timm23,Gsk3b,Immp1l,Kdelr1,Lamtor5,Pttg1ip,Neurl3	12/770
12_Member	GO Biological Processes	GO:0072594	establishment of protein localization to organelle	-2.24691	-0.120544	12514,17113,53600,66541,108705,214854	Cd68,M6pr,Timm23,Immp1l,Pttg1ip,Neurl3	6/350
13_Summary	GO Biological Processes	GO:0048872	homeostasis of number of cells	-3.58044	-0.839047	12772,18578,20482,20655,23797,76959,110257,216892,11998,12825,12475,16423	Ccr2,Pde4b,Skil,Sod1,Akt3,Chmp5,Hba-a2,Spns2,Avp,Col3a1,Cd14,Cd47	12/-
13_Member	GO Biological Processes	GO:0048872	homeostasis of number of cells	-3.58044	-0.839047	12772,18578,20482,20655,23797,76959,110257,216892	Ccr2,Pde4b,Skil,Sod1,Akt3,Chmp5,Hba-a2,Spns2	8/360
13_Member	GO Biological Processes	GO:0002262	myeloid cell homeostasis	-2.86062	-0.426792	12772,18578,20655,76959,110257	Ccr2,Pde4b,Sod1,Chmp5,Hba-a2	5/177
13_Member	GO Biological Processes	GO:0048871	multicellular organismal-level homeostasis	-2.61677	-0.297731	11998,12772,12825,18578,20482,20655,23797,76959,110257,216892	Avp,Ccr2,Col3a1,Pde4b,Skil,Sod1,Akt3,Chmp5,Hba-a2,Spns2	10/750
13_Member	GO Biological Processes	GO:0001776	leukocyte homeostasis	-2.56976	-0.282986	12772,18578,20482,216892	Ccr2,Pde4b,Skil,Spns2	4/125
13_Member	GO Biological Processes	GO:0032649	regulation of type II interferon production	-2.43822	-0.215485	12475,12772,16423,18578	Cd14,Ccr2,Cd47,Pde4b	4/136
13_Member	GO Biological Processes	GO:0032729	positive regulation of type II interferon production	-2.01343	0	12475,12772,18578	Cd14,Ccr2,Pde4b	3/95
14_Summary	GO Biological Processes	GO:0001952	regulation of cell-matrix adhesion	-3.46601	-0.762407	11815,18081,20130,23790,56637,12825,71954,23797,99681,117606,269116,14130,16560	Apod,Ninj1,Rras,Coro1c,Gsk3b,Col3a1,Suds3,Akt3,Tchh,Boc,Nfasc,Fcgr2b,Kif1a	13/-
14_Member	GO Biological Processes	GO:0001952	regulation of cell-matrix adhesion	-3.46601	-0.762407	11815,18081,20130,23790,56637	Apod,Ninj1,Rras,Coro1c,Gsk3b	5/130
14_Member	GO Biological Processes	GO:0030336	negative regulation of cell migration	-2.44113	-0.215485	11815,12825,20130,23790,56637,71954	Apod,Col3a1,Rras,Coro1c,Gsk3b,Suds3	6/319
14_Member	GO Biological Processes	GO:0001954	positive regulation of cell-matrix adhesion	-2.41584	-0.205155	18081,20130,56637	Ninj1,Rras,Gsk3b	3/68
14_Member	GO Biological Processes	GO:0010810	regulation of cell-substrate adhesion	-2.369	-0.172619	11815,18081,20130,23790,56637	Apod,Ninj1,Rras,Coro1c,Gsk3b	5/230
14_Member	GO Biological Processes	GO:2000146	negative regulation of cell motility	-2.35691	-0.169243	11815,12825,20130,23790,56637,71954	Apod,Col3a1,Rras,Coro1c,Gsk3b,Suds3	6/332
14_Member	GO Biological Processes	GO:0040013	negative regulation of locomotion	-2.16621	-0.0672263	11815,12825,20130,23790,56637,71954	Apod,Col3a1,Rras,Coro1c,Gsk3b,Suds3	6/364
14_Member	Reactome Gene Sets	R-MMU-1266738	Developmental Biology	-2.14785	-0.0611347	12825,20130,23797,56637,99681,117606,269116	Col3a1,Rras,Akt3,Gsk3b,Tchh,Boc,Nfasc	7/484
14_Member	GO Biological Processes	GO:0060322	head development	-2.03367	0	11815,12825,14130,16560,20130,23790,23797,56637,269116	Apod,Col3a1,Fcgr2b,Kif1a,Rras,Coro1c,Akt3,Gsk3b,Nfasc	9/771
15_Summary	GO Biological Processes	GO:0048168	regulation of neuronal synaptic plasticity	-3.3733	-0.710436	14130,20964,56637,70546,11421,12772,16592,231207,232227	Fcgr2b,Syn1,Gsk3b,Zdhhc2,Ace,Ccr2,Fabp5,Cpeb2,Iqsec1	9/-
15_Member	GO Biological Processes	GO:0048168	regulation of neuronal synaptic plasticity	-3.3733	-0.710436	14130,20964,56637,70546	Fcgr2b,Syn1,Gsk3b,Zdhhc2	4/76
15_Member	GO Biological Processes	GO:0099177	regulation of trans-synaptic signaling	-2.14069	-0.059758	11421,12772,14130,16592,20964,56637,70546,231207,232227	Ace,Ccr2,Fcgr2b,Fabp5,Syn1,Gsk3b,Zdhhc2,Cpeb2,Iqsec1	9/741
16_Summary	GO Biological Processes	GO:0071417	cellular response to organonitrogen compound	-3.35171	-0.704594	11421,12825,14130,23797,24088,56637,68576,76959,80909,231207,17164,20655,67305,232440,100503605,21937,70456	Ace,Col3a1,Fcgr2b,Akt3,Tlr2,Gsk3b,Lamtor5,Chmp5,Castor2,Cpeb2,Mapkapk2,Sod1,Gpx7,H2aj,Hbb-bs,Tnfrsf1a,Mpc2	17/-
16_Member	GO Biological Processes	GO:0071417	cellular response to organonitrogen compound	-3.35171	-0.704594	11421,12825,14130,23797,24088,56637,68576,76959,80909,231207	Ace,Col3a1,Fcgr2b,Akt3,Tlr2,Gsk3b,Lamtor5,Chmp5,Castor2,Cpeb2	10/599
16_Member	Reactome Gene Sets	R-MMU-2262752	Cellular responses to stress	-3.26342	-0.670277	17164,20655,23797,56637,67305,68576,80909,232440,100503605	Mapkapk2,Sod1,Akt3,Gsk3b,Gpx7,Lamtor5,Castor2,H2aj,Hbb-bs	9/505
16_Member	Reactome Gene Sets	R-MMU-8953897	Cellular responses to stimuli	-3.25113	-0.670277	17164,20655,23797,56637,67305,68576,80909,232440,100503605	Mapkapk2,Sod1,Akt3,Gsk3b,Gpx7,Lamtor5,Castor2,H2aj,Hbb-bs	9/507
16_Member	KEGG Pathway	mmu04150	mTOR signaling pathway - Mus musculus (house mouse)	-3.0928	-0.540462	21937,23797,56637,68576,80909	Tnfrsf1a,Akt3,Gsk3b,Lamtor5,Castor2	5/157
16_Member	Reactome Gene Sets	R-MMU-9711123	Cellular response to chemical stress	-3.06809	-0.532466	20655,23797,56637,67305,100503605	Sod1,Akt3,Gsk3b,Gpx7,Hbb-bs	5/159
16_Member	GO Biological Processes	GO:1901699	cellular response to nitrogen compound	-2.88266	-0.43016	11421,12825,14130,23797,24088,56637,68576,76959,80909,231207	Ace,Col3a1,Fcgr2b,Akt3,Tlr2,Gsk3b,Lamtor5,Chmp5,Castor2,Cpeb2	10/690
16_Member	GO Biological Processes	GO:1901653	cellular response to peptide	-2.79324	-0.396655	11421,14130,23797,56637,76959,231207	Ace,Fcgr2b,Akt3,Gsk3b,Chmp5,Cpeb2	6/271
16_Member	GO Biological Processes	GO:1901652	response to peptide	-2.60825	-0.297731	11421,12825,14130,23797,56637,76959,231207	Ace,Col3a1,Fcgr2b,Akt3,Gsk3b,Chmp5,Cpeb2	7/398
16_Member	KEGG Pathway	mmu05415	Diabetic cardiomyopathy - Mus musculus (house mouse)	-2.51948	-0.246344	11421,12825,23797,56637,70456	Ace,Col3a1,Akt3,Gsk3b,Mpc2	5/212
16_Member	GO Biological Processes	GO:0032006	regulation of TOR signaling	-2.34997	-0.169243	23797,56637,68576,80909	Akt3,Gsk3b,Lamtor5,Castor2	4/144
17_Summary	Reactome Gene Sets	R-MMU-556833	Metabolism of lipids	-3.26814	-0.670277	11770,11883,12908,15211,16592,17113,17164,66775,216892,269823,21937,70456,81877	Fabp4,Arsa,Crat,Hexa,Fabp5,M6pr,Mapkapk2,Hacd4,Spns2,Pon3,Tnfrsf1a,Mpc2,Tnxb	13/-
17_Member	Reactome Gene Sets	R-MMU-556833	Metabolism of lipids	-3.26814	-0.670277	11770,11883,12908,15211,16592,17113,17164,66775,216892,269823	Fabp4,Arsa,Crat,Hexa,Fabp5,M6pr,Mapkapk2,Hacd4,Spns2,Pon3	10/614
17_Member	GO Biological Processes	GO:0032787	monocarboxylic acid metabolic process	-2.29075	-0.138084	11770,12908,15211,21937,66775,70456,81877,269823	Fabp4,Crat,Hexa,Tnfrsf1a,Hacd4,Mpc2,Tnxb,Pon3	8/575
17_Member	Reactome Gene Sets	R-MMU-8978868	Fatty acid metabolism	-2.09812	-0.0341165	12908,17164,66775,269823	Crat,Mapkapk2,Hacd4,Pon3	4/170
18_Summary	Reactome Gene Sets	R-MMU-5357905	Regulation of TNFR1 signaling	-2.93062	-0.448868	17164,21937,24105,11770,12475,84094,17210,54131,68576,76959,232440	Mapkapk2,Tnfrsf1a,Rbck1,Fabp4,Cd14,Plvap,Mcl1,Irf3,Lamtor5,Chmp5,H2aj	11/-
18_Member	Reactome Gene Sets	R-MMU-5357905	Regulation of TNFR1 signaling	-2.93062	-0.448868	17164,21937,24105	Mapkapk2,Tnfrsf1a,Rbck1	3/45
18_Member	GO Biological Processes	GO:0034612	response to tumor necrosis factor	-2.90456	-0.442215	11770,12475,21937,24105,84094	Fabp4,Cd14,Tnfrsf1a,Rbck1,Plvap	5/173
18_Member	GO Biological Processes	GO:0033209	tumor necrosis factor-mediated signaling pathway	-2.79758	-0.396655	21937,24105,84094	Tnfrsf1a,Rbck1,Plvap	3/50
18_Member	Reactome Gene Sets	R-MMU-75893	TNF signaling	-2.7011	-0.344282	17164,21937,24105	Mapkapk2,Tnfrsf1a,Rbck1	3/54
18_Member	GO Biological Processes	GO:0071356	cellular response to tumor necrosis factor	-2.2874	-0.138084	11770,21937,24105,84094	Fabp4,Tnfrsf1a,Rbck1,Plvap	4/150
18_Member	WikiPathways	WP1254	Apoptosis	-2.24896	-0.120544	17210,21937,54131	Mcl1,Tnfrsf1a,Irf3	3/78
18_Member	GO Biological Processes	GO:0043123	positive regulation of canonical NF-kappaB signal transduction	-2.15205	-0.062408	21937,24105,54131,68576	Tnfrsf1a,Rbck1,Irf3,Lamtor5	4/164
18_Member	KEGG Pathway	mmu04217	Necroptosis - Mus musculus (house mouse)	-2.05486	-0.0099394	21937,24105,76959,232440	Tnfrsf1a,Rbck1,Chmp5,H2aj	4/175
19_Summary	GO Biological Processes	GO:0000165	MAPK cascade	-2.77609	-0.387854	11998,17164,24088,54196,84094,12772,18578,56637,57912,228359	Avp,Mapkapk2,Tlr2,Pabpn1,Plvap,Ccr2,Pde4b,Gsk3b,Cdc42se1,Arhgap1	10/-
19_Member	GO Biological Processes	GO:0000165	MAPK cascade	-2.77609	-0.387854	11998,17164,24088,54196,84094	Avp,Mapkapk2,Tlr2,Pabpn1,Plvap	5/185
19_Member	GO Biological Processes	GO:0141124	intracellular signaling cassette	-2.5306	-0.252966	11998,12772,17164,18578,24088,54196,56637,57912,84094,228359	Avp,Ccr2,Mapkapk2,Pde4b,Tlr2,Pabpn1,Gsk3b,Cdc42se1,Plvap,Arhgap1	10/771
20_Summary	GO Biological Processes	GO:0019216	regulation of lipid metabolic process	-2.74044	-0.373119	11815,11998,16592,17691,20655,21937,50781	Apod,Avp,Fabp5,Sik1,Sod1,Tnfrsf1a,Dkk3	7/-
20_Member	GO Biological Processes	GO:0019216	regulation of lipid metabolic process	-2.74044	-0.373119	11815,11998,16592,17691,20655,21937,50781	Apod,Avp,Fabp5,Sik1,Sod1,Tnfrsf1a,Dkk3	7/377
20_Member	GO Biological Processes	GO:0045833	negative regulation of lipid metabolic process	-2.68755	-0.339832	11815,17691,20655,50781	Apod,Sik1,Sod1,Dkk3	4/116
20_Member	GO Biological Processes	GO:0051055	negative regulation of lipid biosynthetic process	-2.45245	-0.215485	17691,20655,50781	Sik1,Sod1,Dkk3	3/66
20_Member	GO Biological Processes	GO:0046890	regulation of lipid biosynthetic process	-2.41755	-0.205155	11998,16592,17691,20655,50781	Avp,Fabp5,Sik1,Sod1,Dkk3	5/224
