# Supplementary material for: Micropillar-induced changes in cell nucleus morphology enhance bone regeneration by modulating the secretome
Source: Research Square preprint supplement (doi:10.21203/rs.3.rs-5530535/v1), 2025-01-06
Supplement: Supplementary file 4 [file fec70326262e72fc811d90a5.xlsx]

## Sheet: proteomic_flat vs pillar_ipp
Accession	Gene	Gene names	Protein IDs	Protein names	-log10 p-value	Qvalue	Log2 Fold change
P0DPI2	GATD3	GATD3	P0DPI2;A0A0B4J2D5		0.983505	0.357054	0.904397
A0AVT1	UBA6	UBA6	A0AVT1	Ubiquitin-like modifier-activating enzyme 6	0.359269	0.659684	-0.143723
A0FGR8	ESYT2	ESYT2	A0FGR8	Extended synaptotagmin-2	0.444127	0.599174	-0.253256
A1L0T0	ILVBL	ILVBL	A1L0T0	Acetolactate synthase-like protein	0.652865	0.472398	-0.222773
A1X283	SH3PXD2B	SH3PXD2B	A1X283;Q5TCZ1	SH3 and PX domain-containing protein 2B	1.28479	0.267836	-0.973181
A2RRP1	NBAS	NBAS	A2RRP1	Neuroblastoma-amplified sequence	0.0665481	0.93703	0.116688
A3KMH1	VWA8	VWA8	A3KMH1	von Willebrand factor A domain-containing protein 8	0.556159	0.526571	1.05103
A5YKK6	CNOT1	CNOT1	A5YKK6	CCR4-NOT transcription complex subunit 1	0.00608625	0.993031	0.0151102
A6NC98	CCDC88B	CCDC88B	A6NC98	Coiled-coil domain-containing protein 88B	2.44252	0.166769	-2.24991
A6NDG6	PGP	PGP	A6NDG6	Phosphoglycolate phosphatase	1.03465	0.344342	-1.14133
A6NDU8	C5orf51	C5orf51	A6NDU8	UPF0600 protein C5orf51	0.753021	0.4294	0.999063
A6NHQ2	FBLL1	FBLL1	A6NHQ2	rRNA/tRNA 2-O-methyltransferase fibrillarin-like protein 1	1.03215	0.344397	-1.21488
A6NHR9	SMCHD1	SMCHD1	A6NHR9	Structural maintenance of chromosomes flexible hinge domain-containing protein 1	2.56561	0.162122	-0.797779
Q99613	EIF3C	EIF3C;EIF3CL	Q99613;B5ME19	Eukaryotic translation initiation factor 3 subunit C;Eukaryotic translation initiation factor 3 subunit C-like protein	0.482805	0.570235	0.203965
P0CG08	GPR89B	GPR89B;GPR89A	P0CG08;B7ZAQ6	Golgi pH regulator B;Golgi pH regulator A	0.576404	0.51802	-0.414712
C4AMC7	WASH3P	WASH3P;WASH2P;WASH1;WASH6P	C4AMC7;Q6VEQ5;A8K0Z3;Q9NQA3;A8MWX3	Putative WAS protein family homolog 3;WAS protein family homolog 2;WAS protein family homolog 1;WAS protein family homolog 6	0.122145	0.886629	0.119955
E9PAV3	NACA	NACA	E9PAV3;Q13765;Q9BZK3	Nascent polypeptide-associated complex subunit alpha, muscle-specific form;Nascent polypeptide-associated complex subunit alpha	1.75255	0.188673	-1.22339
O00115	DNASE2	DNASE2	O00115	Deoxyribonuclease-2-alpha	0.95713	0.36016	1.4263
O00116	AGPS	AGPS	O00116	Alkyldihydroxyacetonephosphate synthase, peroxisomal	0.428001	0.609803	0.288151
O00139	KIF2A	KIF2A	O00139	Kinesin-like protein KIF2A	0.580003	0.517752	-0.627875
O00151	PDLIM1	PDLIM1	O00151	PDZ and LIM domain protein 1	0.410726	0.621843	-0.488118
O00154	ACOT7	ACOT7	O00154	Cytosolic acyl coenzyme A thioester hydrolase	0.0534956	0.950228	0.070336
O00159	MYO1C	MYO1C	O00159	Unconventional myosin-Ic	0.208601	0.81139	-0.0720533
O00170	AIP	AIP	O00170	AH receptor-interacting protein	0.289097	0.728374	0.280928
O00178	GTPBP1	GTPBP1	O00178	GTP-binding protein 1	0.614261	0.497792	1.2721
O00186	STXBP3	STXBP3	O00186	Syntaxin-binding protein 3	2.07176	0.174784	-1.20118
O00203	AP3B1	AP3B1	O00203;Q13367	AP-3 complex subunit beta-1	1.08863	0.328692	0.298877
O00217	NDUFS8	NDUFS8	O00217	NADH dehydrogenase [ubiquinone] iron-sulfur protein 8, mitochondrial	0.100563	0.903574	-0.276998
O00231	PSMD11	PSMD11	O00231	26S proteasome non-ATPase regulatory subunit 11	1.38875	0.256099	0.956086
O00232	PSMD12	PSMD12	O00232	26S proteasome non-ATPase regulatory subunit 12	0.373122	0.647636	-0.565456
O00264	PGRMC1	PGRMC1	O00264	Membrane-associated progesterone receptor component 1	0.0881692	0.91797	-0.229491
O00267	SUPT5H	SUPT5H	O00267	Transcription elongation factor SPT5	0.532838	0.543208	0.978688
O00273	DFFA	DFFA	O00273	DNA fragmentation factor subunit alpha	0.505054	0.558068	0.702147
O00291	HIP1	HIP1	O00291	Huntingtin-interacting protein 1	0.843089	0.389474	0.641979
O00299	CLIC1	CLIC1	O00299	Chloride intracellular channel protein 1	0.0004084	0.999528	-0.000589371
O00303	EIF3F	EIF3F	O00303	Eukaryotic translation initiation factor 3 subunit F	0.845105	0.389737	-2.09668
O00330	PDHX	PDHX	O00330	Pyruvate dehydrogenase protein X component, mitochondrial	0.134552	0.874345	-0.38346
O00391	QSOX1	QSOX1	O00391	Sulfhydryl oxidase 1	1.06966	0.331753	1.61302
O00400	SLC33A1	SLC33A1	O00400	Acetyl-coenzyme A transporter 1	1.83577	0.185238	-1.41222
O00401	WASL	WASL	O00401	Neural Wiskott-Aldrich syndrome protein	0.415479	0.616836	-0.778675
O00410	IPO5	IPO5	O00410	Importin-5	0.996426	0.352059	-0.355132
O00429	DNM1L	DNM1L	O00429	Dynamin-1-like protein	0.467601	0.579572	-0.318228
O00442	RTCA	RTCA	O00442	RNA 3-terminal phosphate cyclase	0.0641734	0.938169	-0.101152
O00443	PIK3C2A	PIK3C2A	O00443	Phosphatidylinositol 4-phosphate 3-kinase C2 domain-containing subunit alpha	0.15417	0.857185	-0.234656
O00461	GOLIM4	GOLIM4	O00461	Golgi integral membrane protein 4	2.33028	0.160146	1.5886
O00469	PLOD2	PLOD2	O00469	Procollagen-lysine,2-oxoglutarate 5-dioxygenase 2	0.192147	0.828134	0.791558
O00471	EXOC5	EXOC5	O00471	Exocyst complex component 5	0.329527	0.688914	-0.475552
O00483	NDUFA4	NDUFA4	O00483	Cytochrome c oxidase subunit NDUFA4	0.111922	0.89631	-0.190275
O00487	PSMD14	PSMD14	O00487	26S proteasome non-ATPase regulatory subunit 14	2.10421	0.175009	-1.20371
O00499	BIN1	BIN1	O00499	Myc box-dependent-interacting protein 1	0.540649	0.538784	0.525019
O00505	KPNA3	KPNA3	O00505	Importin subunit alpha-4	0.148339	0.861197	-0.294119
O00541	PES1	PES1	O00541	Pescadillo homolog	0.461725	0.585564	1.02022
O00560	SDCBP	SDCBP	O00560	Syntenin-1	0.573012	0.519776	-0.780564
O00566	MPHOSPH10	MPHOSPH10	O00566	U3 small nucleolar ribonucleoprotein protein MPP10	1.86867	0.179227	1.6077
O00567	NOP56	NOP56	O00567	Nucleolar protein 56	0.694633	0.451953	-0.531859
O00571	DDX3X	DDX3X	O00571;Q9NQI0	ATP-dependent RNA helicase DDX3X	0.307641	0.707698	-0.13467
O00625	PIR	PIR	O00625	Pirin	0.158656	0.853913	-0.411289
O00629	KPNA4	KPNA4	O00629	Importin subunit alpha-3	0.667284	0.464461	-1.28858
O00743	PPP6C	PPP6C	O00743	Serine/threonine-protein phosphatase 6 catalytic subunit;Serine/threonine-protein phosphatase 6 catalytic subunit, N-terminally processed	0.27146	0.743703	0.288904
O00754	MAN2B1	MAN2B1	O00754	Lysosomal alpha-mannosidase;Lysosomal alpha-mannosidase A peptide;Lysosomal alpha-mannosidase B peptide;Lysosomal alpha-mannosidase C peptide;Lysosomal alpha-mannosidase D peptide;Lysosomal alpha-mannosidase E peptide	0.608877	0.50103	0.859304
O00764	PDXK	PDXK	O00764	Pyridoxal kinase	0.58239	0.516402	0.229937
O14495	PPAP2B	PPAP2B	O14495	Lipid phosphate phosphohydrolase 3	0.242996	0.774625	-0.840334
O14558	HSPB6	HSPB6	O14558	Heat shock protein beta-6	0.587473	0.513256	0.606163
O14579	COPE	COPE	O14579	Coatomer subunit epsilon	1.75165	0.187795	-0.925044
P47813	EIF1AX	EIF1AX;EIF1AY	P47813;O14602	Eukaryotic translation initiation factor 1A, X-chromosomal;Eukaryotic translation initiation factor 1A, Y-chromosomal	0.586612	0.514381	-0.646215
O14617	AP3D1	AP3D1	O14617	AP-3 complex subunit delta-1	0.943059	0.365391	0.816782
O14656	TOR1A	TOR1A	O14656	Torsin-1A	2.51879	0.158143	-2.62116
O14662	STX16	STX16	O14662	Syntaxin-16	0.329053	0.688711	-0.572675
O14684	PTGES	PTGES	O14684	Prostaglandin E synthase	3.7534	0.100667	-1.268
O14734	ACOT8	ACOT8	O14734	Acyl-coenzyme A thioesterase 8	0.725516	0.43555	-1.1538
O14735	CDIPT	CDIPT	O14735	CDP-diacylglycerol--inositol 3-phosphatidyltransferase	0.14023	0.870887	0.36149
O14744	PRMT5	PRMT5	O14744	Protein arginine N-methyltransferase 5;Protein arginine N-methyltransferase 5, N-terminally processed	0.106606	0.898464	0.201465
O14773	TPP1	TPP1	O14773	Tripeptidyl-peptidase 1	0.975925	0.358561	-0.720787
O14776	TCERG1	TCERG1	O14776	Transcription elongation regulator 1	0.514225	0.55302	-0.276922
O14787	TNPO2	TNPO2	O14787	Transportin-2	0.63431	0.487641	-1.18468
O14818	PSMA7	PSMA7	O14818;Q8TAA3	Proteasome subunit alpha type-7	0.536929	0.538441	-0.397946
O14828	SCAMP3	SCAMP3	O14828	Secretory carrier-associated membrane protein 3	2.73274	0.155333	-1.07369
O14841	OPLAH	OPLAH	O14841	5-oxoprolinase	0.407892	0.624241	0.90527
O14874	BCKDK	BCKDK	O14874	[3-methyl-2-oxobutanoate dehydrogenase [lipoamide]] kinase, mitochondrial	0.38779	0.634417	-0.550508
O14880	MGST3	MGST3	O14880	Microsomal glutathione S-transferase 3	0.702684	0.446818	-3.02917
O14920	IKBKB	IKBKB	O14920	Inhibitor of nuclear factor kappa-B kinase subunit beta	1.80586	0.187453	-1.72497
O14933	UBE2L6	UBE2L6	O14933	Ubiquitin/ISG15-conjugating enzyme E2 L6	0.020177	0.975137	-0.0747093
O14936	CASK	CASK	O14936	Peripheral plasma membrane protein CASK	0.41604	0.617386	-0.842852
P19105	MYL12A	MYL12A;MYL12B	P19105;O14950	Myosin regulatory light chain 12A;Myosin regulatory light chain 12B	3.29637	0.151077	-2.24744
O14964	HGS	HGS	O14964	Hepatocyte growth factor-regulated tyrosine kinase substrate	0.0338215	0.963587	0.0469513
O14972	DSCR3	DSCR3	O14972	Down syndrome critical region protein 3	0.349302	0.67206	0.325385
O14974	PPP1R12A	PPP1R12A	O14974	Protein phosphatase 1 regulatory subunit 12A	0.229165	0.789768	-0.167472
O14976	GAK	GAK	O14976	Cyclin-G-associated kinase	0.935849	0.370295	-2.39226
O14979	HNRNPDL	HNRNPDL	O14979	Heterogeneous nuclear ribonucleoprotein D-like	0.890336	0.378984	-0.679827
O14980	XPO1	XPO1	O14980	Exportin-1	1.49533	0.236156	-1.13744
O15013	ARHGEF10	ARHGEF10	O15013	Rho guanine nucleotide exchange factor 10	0.225086	0.794519	0.586807
O15027	SEC16A	SEC16A	O15027	Protein transport protein Sec16A	0.0423196	0.95651	0.0385329
O15031	PLXNB2	PLXNB2	O15031	Plexin-B2	0.194345	0.825743	0.225099
O15042	U2SURP	U2SURP	O15042	U2 snRNP-associated SURP motif-containing protein	1.16181	0.302325	-1.30614
O15050	TRANK1	TRANK1	O15050	TPR and ankyrin repeat-containing protein 1	0.238473	0.777502	-0.188608
O15066	KIF3B	KIF3B	O15066;Q9BVG8;Q9P2E2	Kinesin-like protein KIF3B;Kinesin-like protein KIF3B, N-terminally processed	0.871355	0.382238	-1.39656
O15067	PFAS	PFAS	O15067	Phosphoribosylformylglycinamidine synthase	0.613795	0.497881	0.41057
O15084	ANKRD28	ANKRD28	O15084	Serine/threonine-protein phosphatase 6 regulatory ankyrin repeat subunit A	0.170654	0.843984	-0.350509
O15091	KIAA0391	KIAA0391	O15091	Mitochondrial ribonuclease P protein 3	1.06476	0.330939	1.08457
O15118	NPC1	NPC1	O15118	Niemann-Pick C1 protein	0.391959	0.633433	-0.65443
O15121	DEGS1	DEGS1	O15121	Sphingolipid delta(4)-desaturase DES1	1.2813	0.268036	-1.16259
O15126	SCAMP1	SCAMP1	O15126	Secretory carrier-associated membrane protein 1	0.231783	0.785833	-0.674903
O15127	SCAMP2	SCAMP2	O15127	Secretory carrier-associated membrane protein 2	2.14554	0.175402	-1.87964
O15143	ARPC1B	ARPC1B	O15143	Actin-related protein 2/3 complex subunit 1B	0.689557	0.455795	-0.661148
O15144	ARPC2	ARPC2	O15144	Actin-related protein 2/3 complex subunit 2	1.40583	0.253818	-1.03451
O15145	ARPC3	ARPC3	O15145	Actin-related protein 2/3 complex subunit 3	1.79081	0.185568	-0.586742
O15160	POLR1C	POLR1C	O15160	DNA-directed RNA polymerases I and III subunit RPAC1	0.0348042	0.963953	0.214512
O15173	PGRMC2	PGRMC2	O15173	Membrane-associated progesterone receptor component 2	1.3684	0.25844	-0.498173
O15213	WDR46	WDR46	O15213	WD repeat-containing protein 46	0.843084	0.389032	1.12456
O15228	GNPAT	GNPAT	O15228	Dihydroxyacetone phosphate acyltransferase	0.787674	0.411652	-1.21207
O15254	ACOX3	ACOX3	O15254	Peroxisomal acyl-coenzyme A oxidase 3	0.24179	0.774867	-0.113773
O15260	SURF4	SURF4	O15260	Surfeit locus protein 4	0.468183	0.579722	-0.927597
O15269	SPTLC1	SPTLC1	O15269	Serine palmitoyltransferase 1	1.55694	0.22	-1.77123
O15270	SPTLC2	SPTLC2	O15270	Serine palmitoyltransferase 2	1.86285	0.178944	-2.26229
O15294	OGT	OGT	O15294	UDP-N-acetylglucosamine--peptide N-acetylglucosaminyltransferase 110 kDa subunit	0.846096	0.390041	1.29651
O15296	ALOX15B	ALOX15B	O15296	Arachidonate 15-lipoxygenase B	0.458892	0.58713	-1.29849
O15305	PMM2	PMM2	O15305	Phosphomannomutase 2	0.416013	0.617015	-1.7162
O15321	TM9SF1	TM9SF1	O15321	Transmembrane 9 superfamily member 1	0.539444	0.538012	0.972093
O15355	PPM1G	PPM1G	O15355	Protein phosphatase 1G	1.96042	0.178649	-2.51758
O15357	INPPL1	INPPL1	O15357	Phosphatidylinositol 3,4,5-trisphosphate 5-phosphatase 2	1.40663	0.256	1.80056
O15371	EIF3D	EIF3D	O15371	Eukaryotic translation initiation factor 3 subunit D	0.735129	0.433967	-0.743994
O15372	EIF3H	EIF3H	O15372	Eukaryotic translation initiation factor 3 subunit H	0.273388	0.740961	-0.793699
O15382	BCAT2	BCAT2	O15382	Branched-chain-amino-acid aminotransferase, mitochondrial	0.167548	0.846606	0.295926
O15397	IPO8	IPO8	O15397	Importin-8	1.02566	0.344218	1.00836
O15438	ABCC3	ABCC3	O15438	Canalicular multispecific organic anion transporter 2	0.202449	0.81614	0.793677
O15439	ABCC4	ABCC4	O15439	Multidrug resistance-associated protein 4	0.0781732	0.924963	0.271298
O15460	P4HA2	P4HA2	O15460	Prolyl 4-hydroxylase subunit alpha-2	0.20354	0.81597	0.364028
O15484	CAPN5	CAPN5	O15484	Calpain-5	0.0803622	0.923328	0.193724
O15498	YKT6	YKT6	O15498	Synaptobrevin homolog YKT6	0.243231	0.774827	0.63384
O15511	ARPC5	ARPC5	O15511	Actin-related protein 2/3 complex subunit 5	0.226195	0.793881	-0.2307
O15523	DDX3Y	DDX3Y	O15523	ATP-dependent RNA helicase DDX3Y	0.885526	0.379695	0.423747
O43143	DHX15	DHX15	O43143	Pre-mRNA-splicing factor ATP-dependent RNA helicase DHX15	0.0958663	0.908409	-0.0580482
O43148	RNMT	RNMT	O43148	mRNA cap guanine-N7 methyltransferase	0.773606	0.416689	1.14214
O43149	ZZEF1	ZZEF1	O43149	Zinc finger ZZ-type and EF-hand domain-containing protein 1	0.638067	0.483045	0.88275
O43159	RRP8	RRP8	O43159	Ribosomal RNA-processing protein 8	1.30541	0.263059	-1.13613
O43169	CYB5B	CYB5B	O43169	Cytochrome b5 type B	0.344862	0.676305	-0.518766
O43172	PRPF4	PRPF4	O43172	U4/U6 small nuclear ribonucleoprotein Prp4	0.974347	0.358846	0.706518
O43175	PHGDH	PHGDH	O43175	D-3-phosphoglycerate dehydrogenase	0.0198937	0.974073	-0.0257206
O43237	DYNC1LI2	DYNC1LI2	O43237	Cytoplasmic dynein 1 light intermediate chain 2	0.559411	0.526006	-0.376734
O43242	PSMD3	PSMD3	O43242	26S proteasome non-ATPase regulatory subunit 3	0.212972	0.809327	-0.222371
O43252	PAPSS1	PAPSS1	O43252	Bifunctional 3-phosphoadenosine 5-phosphosulfate synthase 1;Sulfate adenylyltransferase;Adenylyl-sulfate kinase	1.10678	0.31968	-0.859256
O43264	ZW10	ZW10	O43264	Centromere/kinetochore protein zw10 homolog	0.763263	0.424724	1.0597
O43294	TGFB1I1	TGFB1I1	O43294	Transforming growth factor beta-1-induced transcript 1 protein	0.530745	0.543767	-0.953396
O43301	HSPA12A	HSPA12A	O43301	Heat shock 70 kDa protein 12A	0.213756	0.809031	0.467663
O43324	EEF1E1	EEF1E1	O43324	Eukaryotic translation elongation factor 1 epsilon-1	1.30302	0.264637	1.39665
O43390	HNRNPR	HNRNPR	O43390	Heterogeneous nuclear ribonucleoprotein R	0.0158484	0.980825	-0.0138245
O43396	TXNL1	TXNL1	O43396	Thioredoxin-like protein 1	0.912941	0.376036	-0.780172
O43399	TPD52L2	TPD52L2	O43399	Tumor protein D54	0.615743	0.497112	1.50343
O43402	EMC8	EMC8	O43402	ER membrane protein complex subunit 8	0.0822136	0.921731	-0.281428
O43432	EIF4G3	EIF4G3	O43432	Eukaryotic translation initiation factor 4 gamma 3	0.843252	0.389777	-1.18198
O43464	HTRA2	HTRA2	O43464	Serine protease HTRA2, mitochondrial	0.159325	0.853288	0.189102
O43488	AKR7A2	AKR7A2	O43488;Q8NHP1;O95154	Aflatoxin B1 aldehyde reductase member 2	1.96352	0.179347	-0.843007
O43491	EPB41L2	EPB41L2	O43491	Band 4.1-like protein 2	0.0265498	0.969386	-0.0324815
O43572	AKAP10	AKAP10	O43572	A-kinase anchor protein 10, mitochondrial	0.560607	0.525319	1.38899
O43592	XPOT	XPOT	O43592	Exportin-T	0.838337	0.388903	-0.508
O43598	DNPH1	DNPH1	O43598	2-deoxynucleoside 5-phosphate N-hydrolase 1	1.11182	0.319303	-0.814639
O43615	TIMM44	TIMM44	O43615	Mitochondrial import inner membrane translocase subunit TIM44	0.128399	0.880243	-0.046924
O43660	PLRG1	PLRG1	O43660	Pleiotropic regulator 1	0.129346	0.879882	-0.315624
O43681	ASNA1	ASNA1	O43681	ATPase ASNA1	0.60449	0.503531	0.589588
O43684	BUB3	BUB3	O43684	Mitotic checkpoint protein BUB3	0.525319	0.54785	-0.668785
O43707	ACTN4	ACTN4	O43707	Alpha-actinin-4	1.94878	0.179409	-0.551675
O43747	AP1G1	AP1G1	O43747	AP-1 complex subunit gamma-1	0.0669628	0.936631	-0.106845
O43765	SGTA	SGTA	O43765	Small glutamine-rich tetratricopeptide repeat-containing protein alpha	0.0665378	0.936668	-0.206402
O43772	SLC25A20	SLC25A20	O43772	Mitochondrial carnitine/acylcarnitine carrier protein	0.723933	0.436445	1.88262
O43776	NARS	NARS	O43776;REV__H7BZ55	Asparagine--tRNA ligase, cytoplasmic	1.38823	0.255036	-0.970141
O43795	MYO1B	MYO1B	O43795	Unconventional myosin-Ib	1.7083	0.195451	-0.255372
O43809	NUDT21	NUDT21	O43809	Cleavage and polyadenylation specificity factor subunit 5	1.73362	0.186208	-1.02884
O43813	LANCL1	LANCL1	O43813	LanC-like protein 1	0.996807	0.352237	-0.495417
O43815	STRN	STRN	O43815	Striatin	0.923635	0.373782	1.58526
O43818	RRP9	RRP9	O43818	U3 small nucleolar RNA-interacting protein 2	0.711281	0.439246	-0.682772
O43837	IDH3B	IDH3B	O43837	Isocitrate dehydrogenase [NAD] subunit beta, mitochondrial	2.01548	0.165929	0.760852
O43847	NRD1	NRD1	O43847	Nardilysin	0.197007	0.823214	0.40528
O43852	CALU	CALU	O43852	Calumenin	0.32516	0.691052	-0.303549
O43854	EDIL3	EDIL3	O43854	EGF-like repeat and discoidin I-like domain-containing protein 3	1.91948	0.174708	1.72428
O43865	AHCYL1	AHCYL1	O43865	Putative adenosylhomocysteinase 2	1.77227	0.188332	1.85811
O60216	RAD21	RAD21	O60216;Q9H4I0	Double-strand-break repair protein rad21 homolog	0.581104	0.516987	1.14964
O60218	AKR1B10	AKR1B10	O60218	Aldo-keto reductase family 1 member B10	0.312595	0.702852	-0.462379
O60256	PRPSAP2	PRPSAP2	O60256	Phosphoribosyl pyrophosphate synthase-associated protein 2	1.06888	0.330156	1.06919
O60264	SMARCA5	SMARCA5	O60264	SWI/SNF-related matrix-associated actin-dependent regulator of chromatin subfamily A member 5	0.695199	0.452015	1.35237
O60271	SPAG9	SPAG9	O60271	C-Jun-amino-terminal kinase-interacting protein 4	2.20811	0.174125	0.518176
O60287	URB1	URB1	O60287	Nucleolar pre-ribosomal-associated protein 1	0.155209	0.85735	-0.155854
O60306	AQR	AQR	O60306	Intron-binding protein aquarius	0.12202	0.886129	0.285066
O60313	OPA1	OPA1	O60313	Dynamin-like 120 kDa protein, mitochondrial;Dynamin-like 120 kDa protein, form S1	0.281004	0.73482	-0.214628
O60343	TBC1D4	TBC1D4	O60343	TBC1 domain family member 4	0.449173	0.595259	1.55763
O60427	FADS1	FADS1	O60427	Fatty acid desaturase 1	0.901419	0.375748	1.05942
O60437	PPL	PPL	O60437	Periplakin	1.18478	0.296	1.06394
O60443	DFNA5	DFNA5	O60443	Non-syndromic hearing impairment protein 5	1.43195	0.247811	0.328679
O60488	ACSL4	ACSL4	O60488	Long-chain-fatty-acid--CoA ligase 4	0.402889	0.624757	-0.198665
O60493	SNX3	SNX3	O60493	Sorting nexin-3	0.818929	0.39931	-0.427896
O60502	MGEA5	MGEA5	O60502	Protein O-GlcNAcase	0.62251	0.495264	0.463673
O60506	SYNCRIP	SYNCRIP	O60506	Heterogeneous nuclear ribonucleoprotein Q	2.53377	0.158764	-0.740848
O60518	RANBP6	RANBP6	O60518	Ran-binding protein 6	0.651809	0.472859	-0.765774
O60547	GMDS	GMDS	O60547	GDP-mannose 4,6 dehydratase	1.17754	0.298441	0.762587
O60551	NMT2	NMT2	O60551	Glycylpeptide N-tetradecanoyltransferase 2	0.0344175	0.964227	-0.0319767
O60568	PLOD3	PLOD3	O60568	Procollagen-lysine,2-oxoglutarate 5-dioxygenase 3	0.398272	0.62765	0.496237
O60573	EIF4E2	EIF4E2	O60573	Eukaryotic translation initiation factor 4E type 2	0.209658	0.811214	-0.366666
O60610	DIAPH1	DIAPH1	O60610	Protein diaphanous homolog 1	0.980817	0.358316	-1.10151
O60613	2023-09-15	2023-09-15	O60613	15 kDa selenoprotein	0.47262	0.578883	0.613733
O60645	EXOC3	EXOC3	O60645	Exocyst complex component 3	1.52366	0.23084	-2.16267
O60664	PLIN3	PLIN3	O60664	Perilipin-3	0.990312	0.355618	0.383702
O60684	KPNA6	KPNA6	O60684;O15131	Importin subunit alpha-7	0.360588	0.65959	-0.228495
O60701	UGDH	UGDH	O60701	UDP-glucose 6-dehydrogenase	0.530419	0.543713	-0.208786
O60716	CTNND1	CTNND1	O60716	Catenin delta-1	0.854154	0.387592	0.35213
O60725	ICMT	ICMT	O60725	Protein-S-isoprenylcysteine O-methyltransferase	0.152656	0.858322	-0.404974
O60739	EIF1B	EIF1B	O60739	Eukaryotic translation initiation factor 1b	0.673452	0.464088	-1.10676
O60749	SNX2	SNX2	O60749	Sorting nexin-2	0.169144	0.845841	0.124248
O60762	DPM1	DPM1	O60762	Dolichol-phosphate mannosyltransferase subunit 1	0.341393	0.677044	-0.322174
O60763	USO1	USO1	O60763;REV__Q5VZ89	General vesicular transport factor p115	2.38734	0.169111	0.49703
O60784	TOM1	TOM1	O60784	Target of Myb protein 1	3.66177	0.0985	-1.13954
O60826	CCDC22	CCDC22	O60826	Coiled-coil domain-containing protein 22	0.949756	0.362178	0.550714
O60831	PRAF2	PRAF2	O60831	PRA1 family protein 2	0.280061	0.735438	-0.233718
O60832	DKC1	DKC1	O60832	H/ACA ribonucleoprotein complex subunit 4	1.066	0.330942	0.94195
O60841	EIF5B	EIF5B	O60841	Eukaryotic translation initiation factor 5B	1.31766	0.263005	-0.405935
O60879	DIAPH2	DIAPH2	O60879	Protein diaphanous homolog 2	0.118091	0.890814	0.15031
O60884	DNAJA2	DNAJA2	O60884	DnaJ homolog subfamily A member 2	0.660463	0.470446	-1.95947
O60888	CUTA	CUTA	O60888	Protein CutA	0.751149	0.430573	0.593612
O75027	ABCB7	ABCB7	O75027	ATP-binding cassette sub-family B member 7, mitochondrial	0.194372	0.826124	-0.494238
P0DMP2	SRGAP2B	SRGAP2B;SRGAP2;SRGAP2C	P0DMP2;O75044;P0DJJ0	SLIT-ROBO Rho GTPase-activating protein 2B;SLIT-ROBO Rho GTPase-activating protein 2;SLIT-ROBO Rho GTPase-activating protein 2C	0.151643	0.858086	-0.485385
O75083	WDR1	WDR1	O75083	WD repeat-containing protein 1	2.10679	0.179614	-0.639396
O75116	ROCK2	ROCK2	O75116	Rho-associated protein kinase 2	0.381568	0.639172	-0.288322
O75131	CPNE3	CPNE3	O75131;Q8IYJ1;Q96A23;O95741;Q9HCH3;Q9UBL6	Copine-3	0.591267	0.509472	-0.465111
O75146	HIP1R	HIP1R	O75146	Huntingtin-interacting protein 1-related protein	0.521525	0.550083	0.814598
O75152	ZC3H11A	ZC3H11A	O75152	Zinc finger CCCH domain-containing protein 11A	0.896332	0.37728	1.86636
O75153	CLUH	CLUH	O75153	Clustered mitochondria protein homolog	2.37288	0.168384	-1.24076
O75165	DNAJC13	DNAJC13	O75165	DnaJ homolog subfamily C member 13	0.112134	0.89695	0.0819111
O75179	ANKRD17	ANKRD17	O75179	Ankyrin repeat domain-containing protein 17	0.286479	0.731358	0.915564
O75223	GGCT	GGCT	O75223	Gamma-glutamylcyclotransferase	0.0699585	0.934055	0.163806
O75251	NDUFS7	NDUFS7	O75251	NADH dehydrogenase [ubiquinone] iron-sulfur protein 7, mitochondrial	0.106908	0.899172	-0.170001
O75306	NDUFS2	NDUFS2	O75306	NADH dehydrogenase [ubiquinone] iron-sulfur protein 2, mitochondrial	0.0404317	0.958993	-0.0827535
O75312	ZPR1	ZPR1	O75312	Zinc finger protein ZPR1	1.20763	0.286534	1.45201
O75323	GBAS	GBAS	O75323	Protein NipSnap homolog 2	0.144796	0.866009	0.258827
O75340	PDCD6	PDCD6	O75340	Programmed cell death protein 6	0.0570838	0.945219	0.0795294
O75348	ATP6V1G1	ATP6V1G1;ATP6V1G2	O75348;O95670	V-type proton ATPase subunit G 1;V-type proton ATPase subunit G 2	0.760517	0.426728	-1.30256
O75351	VPS4B	VPS4B	O75351	Vacuolar protein sorting-associated protein 4B	0.301556	0.716324	0.423872
O75352	MPDU1	MPDU1	O75352	Mannose-P-dolichol utilization defect 1 protein	0.0530642	0.951136	-0.0531915
O75367	H2AFY	H2AFY	O75367	Core histone macro-H2A.1	0.237836	0.77838	0.25054
O75368	SH3BGRL	SH3BGRL	O75368	SH3 domain-binding glutamic acid-rich-like protein	1.79148	0.185919	0.937754
O75369	FLNB	FLNB	O75369	Filamin-B	1.88944	0.183301	-0.615491
O75381	PEX14	PEX14	O75381	Peroxisomal membrane protein PEX14	0.579068	0.517316	0.768056
O75382	TRIM3	TRIM3	O75382;Q9C040	Tripartite motif-containing protein 3	1.33874	0.262142	-1.62884
O75390	CS	CS	O75390	Citrate synthase, mitochondrial	0.0467578	0.953982	-0.036417
O75396	SEC22B	SEC22B	O75396	Vesicle-trafficking protein SEC22b	1.03854	0.342427	-1.65557
O75400	PRPF40A	PRPF40A	O75400	Pre-mRNA-processing factor 40 homolog A	0.0511449	0.950838	0.051335
O75427	LRCH4	LRCH4	O75427	Leucine-rich repeat and calponin homology domain-containing protein 4	0.800644	0.409836	1.403
O75431	MTX2	MTX2	O75431	Metaxin-2	0.155167	0.856976	0.231006
O75436	VPS26A	VPS26A	O75436	Vacuolar protein sorting-associated protein 26A	0.450971	0.594221	-0.771377
O75439	PMPCB	PMPCB	O75439	Mitochondrial-processing peptidase subunit beta	1.29637	0.264304	-1.50926
O75475	PSIP1	PSIP1	O75475	PC4 and SFRS1-interacting protein	0.149687	0.859962	-0.406683
O75477	ERLIN1	ERLIN1	O75477	Erlin-1	1.14105	0.304664	-1.54295
O75489	NDUFS3	NDUFS3	O75489	NADH dehydrogenase [ubiquinone] iron-sulfur protein 3, mitochondrial	0.346795	0.675012	0.361381
O75494	SRSF10	SRSF10	O75494	Serine/arginine-rich splicing factor 10	0.794074	0.411861	-1.35084
O75521	ECI2	ECI2	O75521	Enoyl-CoA delta isomerase 2, mitochondrial	0.507705	0.557349	0.468354
O75531	BANF1	BANF1	O75531	Barrier-to-autointegration factor;Barrier-to-autointegration factor, N-terminally processed	0.188422	0.831443	-0.400715
O75533	SF3B1	SF3B1	O75533	Splicing factor 3B subunit 1	0.289612	0.728775	-0.383031
O75534	CSDE1	CSDE1	O75534	Cold shock domain-containing protein E1	1.85941	0.178525	-0.539003
O75569	PRKRA	PRKRA	O75569	Interferon-inducible double-stranded RNA-dependent protein kinase activator A	0.00538053	0.993827	0.0100867
O75592	MYCBP2	MYCBP2	O75592	E3 ubiquitin-protein ligase MYCBP2	0.284299	0.732882	-0.7178
O75608	LYPLA1	LYPLA1	O75608	Acyl-protein thioesterase 1	0.153192	0.858488	0.146575
O75643	SNRNP200	SNRNP200	O75643	U5 small nuclear ribonucleoprotein 200 kDa helicase	0.206783	0.81306	-0.119272
O75663	TIPRL	TIPRL	O75663	TIP41-like protein	0.299357	0.718233	0.3066
O75694	NUP155	NUP155	O75694	Nuclear pore complex protein Nup155	0.655256	0.472294	-0.449081
O75695	RP2	RP2	O75695	Protein XRP2	0.406362	0.624212	-0.475679
O75718	CRTAP	CRTAP	O75718	Cartilage-associated protein	0.0866118	0.918779	-0.0830479
O75746	SLC25A12	SLC25A12	O75746	Calcium-binding mitochondrial carrier protein Aralar1	0.157066	0.856338	0.129247
O75787	ATP6AP2	ATP6AP2	O75787	Renin receptor	1.33535	0.261622	1.37747
O75821	EIF3G	EIF3G	O75821	Eukaryotic translation initiation factor 3 subunit G	1.73739	0.186527	1.33312
O75822	EIF3J	EIF3J	O75822	Eukaryotic translation initiation factor 3 subunit J	0.27348	0.741213	0.17226
O75828	CBR3	CBR3	O75828	Carbonyl reductase [NADPH] 3	0.17619	0.839755	0.255129
O75844	ZMPSTE24	ZMPSTE24	O75844	CAAX prenyl protease 1 homolog	0.672704	0.463054	-0.837096
O75874	IDH1	IDH1	O75874	Isocitrate dehydrogenase [NADP] cytoplasmic	0.388698	0.63397	-0.190056
O75891	ALDH1L1	ALDH1L1	O75891	Cytosolic 10-formyltetrahydrofolate dehydrogenase	0.422306	0.611115	1.01667
O75915	ARL6IP5	ARL6IP5	O75915	PRA1 family protein 3	0.781034	0.410424	-2.28799
O75947	ATP5H	ATP5H	O75947	ATP synthase subunit d, mitochondrial	0.567621	0.521647	0.457947
O75955	FLOT1	FLOT1	O75955	Flotillin-1	0.483729	0.569333	-0.289267
O75962	TRIO	TRIO	O75962;O60229	Triple functional domain protein	0.0423118	0.956153	-0.160845
O75964	ATP5L	ATP5L	O75964	ATP synthase subunit g, mitochondrial	0.562021	0.523656	-0.427657
O75976	CPD	CPD	O75976	Carboxypeptidase D	1.80111	0.186021	1.50036
O76003	GLRX3	GLRX3	O76003	Glutaredoxin-3	0.823588	0.39657	-0.499468
O76021	RSL1D1	RSL1D1	O76021	Ribosomal L1 domain-containing protein 1	1.10374	0.321307	0.105025
O76024	WFS1	WFS1	O76024	Wolframin	0.826151	0.393929	1.11982
O76031	CLPX	CLPX	O76031	ATP-dependent Clp protease ATP-binding subunit clpX-like, mitochondrial	0.545591	0.536245	1.07831
O76054	SEC14L2	SEC14L2;SEC14L3	O76054;Q9UDX4	SEC14-like protein 2;SEC14-like protein 3	0.406098	0.624486	-1.07617
O76071	CIAO1	CIAO1	O76071	Probable cytosolic iron-sulfur protein assembly protein CIAO1	0.631708	0.490033	-0.662644
O76094	SRP72	SRP72	O76094	Signal recognition particle subunit SRP72	0.435817	0.604874	0.195378
O94760	DDAH1	DDAH1	O94760	N(G),N(G)-dimethylarginine dimethylaminohydrolase 1	0.00587388	0.993134	0.0121053
O94776	MTA2	MTA2	O94776	Metastasis-associated protein MTA2	0.279417	0.735683	-0.513307
O94804	STK10	STK10	O94804	Serine/threonine-protein kinase 10	0.682446	0.457478	-0.891531
O94808	GFPT2	GFPT2	O94808	Glutamine--fructose-6-phosphate aminotransferase [isomerizing] 2	1.01462	0.345742	-0.708478
O94822	LTN1	LTN1	O94822	E3 ubiquitin-protein ligase listerin	0.0661818	0.93602	0.437632
O94826	TOMM70A	TOMM70A	O94826	Mitochondrial import receptor subunit TOM70	0.174174	0.841004	-0.088714
O94832	MYO1D	MYO1D	O94832	Unconventional myosin-Id	0.144979	0.866183	-0.353985
O94851	MICAL2	MICAL2	O94851	Protein-methionine sulfoxide oxidase MICAL2	0.0526893	0.951203	0.132029
O94855	SEC24D	SEC24D	O94855	Protein transport protein Sec24D	0.654079	0.471553	0.418135
O94874	UFL1	UFL1	O94874	E3 UFM1-protein ligase 1	0.400237	0.627496	0.323334
O94875	SORBS2	SORBS2	O94875	Sorbin and SH3 domain-containing protein 2	0.188554	0.831925	-0.600879
O94901	SUN1	SUN1	O94901	SUN domain-containing protein 1	1.0486	0.337042	1.969
O94903	PROSC	PROSC	O94903	Proline synthase co-transcribed bacterial homolog protein	0.754758	0.429327	1.00533
O94905	ERLIN2	ERLIN2	O94905	Erlin-2	0.398991	0.627246	-0.434849
O94906	PRPF6	PRPF6	O94906	Pre-mRNA-processing factor 6	0.0305893	0.967361	0.0457129
O94915	FRYL	FRYL	O94915	Protein furry homolog-like	0.84887	0.389537	-1.2648
O94919	ENDOD1	ENDOD1	O94919	Endonuclease domain-containing 1 protein	0.600048	0.50502	-0.256706
O94925	GLS	GLS	O94925	Glutaminase kidney isoform, mitochondrial	0.91492	0.374401	-0.43475
O94929	ABLIM3	ABLIM3	O94929	Actin-binding LIM protein 3	0.40549	0.624164	-0.593079
O94966	USP19	USP19	O94966	Ubiquitin carboxyl-terminal hydrolase 19	0.524551	0.548293	0.713974
O94973	AP2A2	AP2A2	O94973	AP-2 complex subunit alpha-2	1.13181	0.310055	-0.537563
O94979	SEC31A	SEC31A	O94979	Protein transport protein Sec31A	0.791217	0.411866	-0.110674
O95140	MFN2	MFN2	O95140	Mitofusin-2	0.380105	0.640365	0.164903
O95159	ZFPL1	ZFPL1	O95159	Zinc finger protein-like 1	0.086635	0.919145	0.278317
O95163	IKBKAP	IKBKAP	O95163	Elongator complex protein 1	0.792086	0.411392	-0.397296
O95202	LETM1	LETM1	O95202	LETM1 and EF-hand domain-containing protein 1, mitochondrial	1.15184	0.305134	0.474234
O95219	SNX4	SNX4	O95219	Sorting nexin-4	0.264436	0.751948	-0.397527
O95232	LUC7L3	LUC7L3	O95232	Luc7-like protein 3	0.481856	0.57105	0.633833
O95248	SBF1	SBF1	O95248	Myotubularin-related protein 5	0.874351	0.382026	1.16921
O95292	VAPB	VAPB	O95292	Vesicle-associated membrane protein-associated protein B/C	0.511781	0.555013	1.50969
O95299	NDUFA10	NDUFA10	O95299	NADH dehydrogenase [ubiquinone] 1 alpha subcomplex subunit 10, mitochondrial	0.369194	0.651815	0.478685
O95302	FKBP9	FKBP9	O95302	Peptidyl-prolyl cis-trans isomerase FKBP9	0.00860548	0.988343	-0.0209494
O95336	PGLS	PGLS	O95336	6-phosphogluconolactonase	0.0343898	0.964019	-0.0155754
O95340	PAPSS2	PAPSS2	O95340	Bifunctional 3-phosphoadenosine 5-phosphosulfate synthase 2;Sulfate adenylyltransferase;Adenylyl-sulfate kinase	2.20953	0.175116	-1.51952
O95352	ATG7	ATG7	O95352	Ubiquitin-like modifier-activating enzyme ATG7	1.02064	0.344992	1.16356
O95361	TRIM16	TRIM16;TRIM16L	O95361;Q309B1	Tripartite motif-containing protein 16;Tripartite motif-containing protein 16-like protein	0.520021	0.549063	0.578397
O95372	LYPLA2	LYPLA2	O95372	Acyl-protein thioesterase 2	2.83395	0.171	-2.96521
O95373	IPO7	IPO7	O95373	Importin-7	0.048981	0.952387	-0.0898215
O95394	PGM3	PGM3	O95394	Phosphoacetylglucosamine mutase	0.488996	0.569323	-0.286074
O95396	MOCS3	MOCS3	O95396	Adenylyltransferase and sulfurtransferase MOCS3;Molybdopterin-synthase adenylyltransferase;Molybdopterin-synthase sulfurtransferase	0.73604	0.433233	1.78426
O95425	SVIL	SVIL	O95425	Supervillin	0.47689	0.575212	-0.765439
O95433	AHSA1	AHSA1	O95433	Activator of 90 kDa heat shock protein ATPase homolog 1	1.38112	0.256954	1.87826
O95453	PARN	PARN	O95453	Poly(A)-specific ribonuclease PARN	0.0139873	0.981049	0.017861
O95456	PSMG1	PSMG1	O95456	Proteasome assembly chaperone 1	0.417854	0.61674	0.262475
O95470	SGPL1	SGPL1	O95470	Sphingosine-1-phosphate lyase 1	0.333761	0.685312	-0.591833
O95479	H6PD	H6PD	O95479	GDH/6PGL endoplasmic bifunctional protein;Glucose 1-dehydrogenase;6-phosphogluconolactonase	0.539868	0.53805	0.581776
O95486	SEC24A	SEC24A	O95486	Protein transport protein Sec24A	1.94728	0.177033	0.900059
O95487	SEC24B	SEC24B	O95487	Protein transport protein Sec24B	2.39861	0.159887	0.720587
O95551	TDP2	TDP2	O95551	Tyrosyl-DNA phosphodiesterase 2	0.0769825	0.926333	-0.209973
O95571	ETHE1	ETHE1	O95571	Persulfide dioxygenase ETHE1, mitochondrial	0.481771	0.570425	-0.387533
O95573	ACSL3	ACSL3	O95573	Long-chain-fatty-acid--CoA ligase 3	2.00489	0.166993	0.669959
O95671	ASMTL	ASMTL	O95671	N-acetylserotonin O-methyltransferase-like protein	0.0318998	0.965455	-0.129365
O95674	CDS2	CDS2	O95674	Phosphatidate cytidylyltransferase 2	0.446108	0.598191	-0.670665
O95747	OXSR1	OXSR1	O95747	Serine/threonine-protein kinase OSR1	0.906612	0.374728	-0.461147
O95758	PTBP3	PTBP3	O95758	Polypyrimidine tract-binding protein 3	0.727397	0.435742	-0.955616
O95782	AP2A1	AP2A1	O95782	AP-2 complex subunit alpha-1	2.16684	0.175327	-0.681016
O95786	DDX58	DDX58	O95786	Probable ATP-dependent RNA helicase DDX58	1.48785	0.235006	-0.849784
O95793	STAU1	STAU1	O95793	Double-stranded RNA-binding protein Staufen homolog 1	0.183334	0.834704	0.323253
O95801	TTC4	TTC4	O95801	Tetratricopeptide repeat protein 4	2.82297	0.172	1.0605
O95816	BAG2	BAG2	O95816	BAG family molecular chaperone regulator 2	0.652264	0.472316	-0.931539
O95817	BAG3	BAG3	O95817	BAG family molecular chaperone regulator 3	0.314111	0.701329	-0.345392
O95819	MAP4K4	MAP4K4	O95819;Q9UKE5	Mitogen-activated protein kinase kinase kinase kinase 4	0.557213	0.527318	1.04661
O95825	CRYZL1	CRYZL1	O95825	Quinone oxidoreductase-like protein 1	1.228	0.279841	-1.2236
O95831	AIFM1	AIFM1	O95831	Apoptosis-inducing factor 1, mitochondrial	0.105863	0.898499	0.0954386
O95834	EML2	EML2	O95834;O00423	Echinoderm microtubule-associated protein-like 2	0.605786	0.504169	-1.07477
O95861	BPNT1	BPNT1	O95861	3(2),5-bisphosphate nucleotidase 1	0.43307	0.605044	0.0945759
O95865	DDAH2	DDAH2	O95865	N(G),N(G)-dimethylarginine dimethylaminohydrolase 2	0.910014	0.37559	-0.473912
O95870	ABHD16A	ABHD16A	O95870	Abhydrolase domain-containing protein 16A	1.2282	0.279766	-0.749544
O95881	TXNDC12	TXNDC12	O95881	Thioredoxin domain-containing protein 12	0.927281	0.371905	-1.09549
O96005	CLPTM1	CLPTM1	O96005	Cleft lip and palate transmembrane protein 1	0.38341	0.638514	0.570281
O96008	TOMM40	TOMM40	O96008	Mitochondrial import receptor subunit TOM40 homolog	0.613258	0.497977	-1.40388
O96019	ACTL6A	ACTL6A	O96019;O94805	Actin-like protein 6A	0.639359	0.482825	0.449332
P00325	ADH1B	ADH1B	P00325;P07327;P08319	Alcohol dehydrogenase 1B	0.0698581	0.933751	-0.274075
P00338	LDHA	LDHA	P00338;Q6ZMR3;P07864	L-lactate dehydrogenase A chain	0.48974	0.569487	-0.156821
P00367	GLUD1	GLUD1;GLUD2	P00367;P49448	Glutamate dehydrogenase 1, mitochondrial;Glutamate dehydrogenase 2, mitochondrial	0.32376	0.69122	-0.250336
P00387	CYB5R3	CYB5R3	P00387	NADH-cytochrome b5 reductase 3;NADH-cytochrome b5 reductase 3 membrane-bound form;NADH-cytochrome b5 reductase 3 soluble form	0.38679	0.63474	-0.405146
P00390	GSR	GSR	P00390	Glutathione reductase, mitochondrial	0.375133	0.647643	-0.133478
P00403	MT-CO2	MT-CO2	P00403	Cytochrome c oxidase subunit 2	0.260017	0.756763	0.107013
P00441	SOD1	SOD1	P00441	Superoxide dismutase [Cu-Zn]	0.027723	0.969601	-0.0236187
P00491	PNP	PNP	P00491	Purine nucleoside phosphorylase	0.814338	0.400466	-2.52629
P00492	HPRT1	HPRT1	P00492	Hypoxanthine-guanine phosphoribosyltransferase	1.56063	0.219586	-0.701876
P00505	GOT2	GOT2	P00505	Aspartate aminotransferase, mitochondrial	2.0531	0.171323	-0.810261
P00533	EGFR	EGFR	P00533	Epidermal growth factor receptor	0.109956	0.898403	0.101936
P00558	PGK1	PGK1	P00558;P07205	Phosphoglycerate kinase 1	0.138854	0.872556	0.0802689
P00568	AK1	AK1	P00568;Q9Y6K8	Adenylate kinase isoenzyme 1	0.817025	0.39979	-0.571208
P00813	ADA	ADA	P00813	Adenosine deaminase	1.51685	0.235553	-2.25771
P00966	ASS1	ASS1	P00966	Argininosuccinate synthase	0.0115667	0.983257	-0.0241451
P01033	TIMP1	TIMP1	P01033	Metalloproteinase inhibitor 1	0.00829313	0.988696	-0.0130444
P01111	NRAS	NRAS	P01111	GTPase NRas	2.22698	0.16617	-1.56134
P02511	CRYAB	CRYAB	P02511	Alpha-crystallin B chain	0.530609	0.543687	-0.533445
P02545	LMNA	LMNA	P02545	Prelamin-A/C;Lamin-A/C	3.0444	0.146737	1.59683
P02751	FN1	FN1	P02751	Fibronectin;Anastellin;Ugl-Y1;Ugl-Y2;Ugl-Y3	0.120503	0.888424	-0.130751
P02786	TFRC	TFRC	P02786	Transferrin receptor protein 1;Transferrin receptor protein 1, serum form	0.64558	0.477404	0.41691
P02792	FTL	FTL	P02792	Ferritin light chain	0.801348	0.409998	0.535316
P02794	FTH1	FTH1	P02794	Ferritin heavy chain;Ferritin heavy chain, N-terminally processed	0.260185	0.756732	0.341384
P03905	MT-ND4	MT-ND4	P03905	NADH-ubiquinone oxidoreductase chain 4	0.939346	0.368426	-1.21845
P04040	CAT	CAT	P04040	Catalase	0.599564	0.504974	1.27983
P04062	GBA	GBA	P04062	Glucosylceramidase	0.487377	0.568656	-0.27776
P04066	FUCA1	FUCA1	P04066	Tissue alpha-L-fucosidase	0.106603	0.898096	0.16629
P04075	ALDOA	ALDOA	P04075;P05062	Fructose-bisphosphate aldolase A	0.142769	0.868843	0.127981
P04080	CSTB	CSTB	P04080	Cystatin-B	0.600608	0.504952	1.45289
P04083	ANXA1	ANXA1	P04083	Annexin A1	0.17102	0.843943	-0.113934
P04179	SOD2	SOD2	P04179	Superoxide dismutase [Mn], mitochondrial	0.882463	0.381102	-1.10577
P04181	OAT	OAT	P04181	Ornithine aminotransferase, mitochondrial;Ornithine aminotransferase, hepatic form;Ornithine aminotransferase, renal form	0.749742	0.430659	-0.516509
P04216	THY1	THY1	P04216	Thy-1 membrane glycoprotein	2.6337	0.160744	-1.43477
P04406	GAPDH	GAPDH	P04406;O14556	Glyceraldehyde-3-phosphate dehydrogenase	0.458595	0.5875	-0.178218
P04424	ASL	ASL	P04424	Argininosuccinate lyase	0.659562	0.470717	1.54888
P04439	HLA-A	HLA-A;HLA-H	P04439;P01893;P17693;P30511;P13747	HLA class I histocompatibility antigen, A-3 alpha chain;Putative HLA class I histocompatibility antigen, alpha chain H	1.23126	0.278712	-2.71695
P04632	CAPNS1	CAPNS1	P04632;Q96L46	Calpain small subunit 1	1.26149	0.272693	-0.407071
P04792	HSPB1	HSPB1	P04792	Heat shock protein beta-1	0.0780678	0.924757	0.0458272
P04843	RPN1	RPN1	P04843	Dolichyl-diphosphooligosaccharide--protein glycosyltransferase subunit 1	0.433725	0.606235	-0.214539
P04844	RPN2	RPN2	P04844	Dolichyl-diphosphooligosaccharide--protein glycosyltransferase subunit 2	0.964314	0.361812	-0.485853
P04899	GNAI2	GNAI2	P04899	Guanine nucleotide-binding protein G(i) subunit alpha-2	0.23458	0.782348	-0.15723
Q93077	HIST1H2AC	HIST1H2AC;HIST3H2A;HIST1H2AB	Q93077;Q7L7L0;P04908;REV__Q8NB25	Histone H2A type 1-C;Histone H2A type 3;Histone H2A type 1-B/E	0.861225	0.385454	2.18857
P05023	ATP1A1	ATP1A1	P05023;P13637;Q13733;P20648	Sodium/potassium-transporting ATPase subunit alpha-1	2.80524	0.164903	-1.05709
P05091	ALDH2	ALDH2	P05091	Aldehyde dehydrogenase, mitochondrial	0.0360064	0.962876	-0.0331014
P05120	SERPINB2	SERPINB2	P05120	Plasminogen activator inhibitor 2	0.208788	0.812118	-0.3006
P05121	SERPINE1	SERPINE1	P05121	Plasminogen activator inhibitor 1	0.0429783	0.956388	0.0878785
P05141	SLC25A5	SLC25A5	P05141	ADP/ATP translocase 2;ADP/ATP translocase 2, N-terminally processed	0.648886	0.476437	-0.719098
P05166	PCCB	PCCB	P05166	Propionyl-CoA carboxylase beta chain, mitochondrial	0.137181	0.873996	-0.200787
P05198	EIF2S1	EIF2S1	P05198	Eukaryotic translation initiation factor 2 subunit 1	1.11634	0.317148	0.512774
P05386	RPLP1	RPLP1	P05386	60S acidic ribosomal protein P1	0.114534	0.895716	0.149612
P05387	RPLP2	RPLP2	P05387	60S acidic ribosomal protein P2	0.713039	0.438848	0.774736
P05388	RPLP0	RPLP0;RPLP0P6	P05388;Q8NHW5	60S acidic ribosomal protein P0;60S acidic ribosomal protein P0-like	0.0267939	0.969318	-0.0153885
P05455	SSB	SSB	P05455	Lupus La protein	0.0454986	0.95572	0.0455831
P05496	ATP5G1	ATP5G1;ATP5G2;ATP5G3	P05496;Q06055;P48201	ATP synthase F(0) complex subunit C1, mitochondrial;ATP synthase F(0) complex subunit C2, mitochondrial;ATP synthase F(0) complex subunit C3, mitochondrial	0.0146679	0.980843	-0.0664299
P05556	ITGB1	ITGB1	P05556	Integrin beta-1	1.08105	0.328865	0.782522
P05783	KRT18	KRT18	P05783;CON__P05784	Keratin, type I cytoskeletal 18	0.520379	0.548896	-1.19685
P06132	UROD	UROD	P06132	Uroporphyrinogen decarboxylase	1.69428	0.19531	-1.02133
P06241	FYN	FYN	P06241	Tyrosine-protein kinase Fyn	0.212042	0.809366	-0.459307
P06280	GLA	GLA	P06280	Alpha-galactosidase A	1.24476	0.278529	1.97894
P06396	GSN	GSN	P06396;REV__Q6TDU7	Gelsolin	0.656398	0.471479	-0.349585
P06576	ATP5B	ATP5B	P06576	ATP synthase subunit beta, mitochondrial	0.878997	0.380846	-0.31826
P06703	S100A6	S100A6	P06703	Protein S100-A6	0.962201	0.361891	-4.81998
P06730	EIF4E	EIF4E	P06730;A6NMX2	Eukaryotic translation initiation factor 4E	2.34285	0.161722	-0.727167
P06733	ENO1	ENO1	P06733	Alpha-enolase	0.674984	0.462778	0.288765
P06737	PYGL	PYGL	P06737	Glycogen phosphorylase, liver form	0.881573	0.379898	0.273831
P06744	GPI	GPI	P06744;Q8N196	Glucose-6-phosphate isomerase	0.524749	0.548627	0.390481
P06748	NPM1	NPM1	P06748	Nucleophosmin	1.07841	0.330082	-0.636365
P06756	ITGAV	ITGAV	P06756	Integrin alpha-V;Integrin alpha-V heavy chain;Integrin alpha-V light chain	0.391038	0.633268	0.700265
P06865	HEXA	HEXA	P06865	Beta-hexosaminidase subunit alpha	0.0448336	0.955532	-0.0796776
P07093	SERPINE2	SERPINE2	P07093	Glia-derived nexin	0.582935	0.515932	-0.795543
P07099	EPHX1	EPHX1	P07099	Epoxide hydrolase 1	0.138337	0.872301	-0.135874
P07195	LDHB	LDHB	P07195	L-lactate dehydrogenase B chain	2.03334	0.170459	-0.641977
P07203	GPX1	GPX1	P07203	Glutathione peroxidase 1	0.00375718	0.996545	-0.00713158
P07237	P4HB	P4HB	P07237	Protein disulfide-isomerase	0.451958	0.594224	-0.121695
P07305	H1F0	H1F0	P07305	Histone H1.0;Histone H1.0, N-terminally processed	1.02845	0.343599	-1.86559
P07339	CTSD	CTSD	P07339	Cathepsin D;Cathepsin D light chain;Cathepsin D heavy chain	0.28212	0.734057	0.207326
P07355	ANXA2	ANXA2;ANXA2P2	P07355;A6NMY6	Annexin A2;Putative annexin A2-like protein	0.0498247	0.951743	-0.0287437
P07384	CAPN1	CAPN1	P07384	Calpain-1 catalytic subunit	0.198473	0.821231	0.115545
P07437	TUBB	TUBB	P07437	Tubulin beta chain	0.638278	0.483345	-0.664267
P07602	PSAP	PSAP	P07602	Prosaposin;Saposin-A;Saposin-B-Val;Saposin-B;Saposin-C;Saposin-D	0.105585	0.89831	0.147827
P07686	HEXB	HEXB	P07686	Beta-hexosaminidase subunit beta;Beta-hexosaminidase subunit beta chain B;Beta-hexosaminidase subunit beta chain A	0.336248	0.68262	-0.317154
P07711	CTSL	CTSL	P07711	Cathepsin L1;Cathepsin L1 heavy chain;Cathepsin L1 light chain	0.684499	0.456741	1.07139
P07737	PFN1	PFN1	P07737;CON__P02584	Profilin-1	1.07704	0.330508	-0.61814
P07738	BPGM	BPGM	P07738	Bisphosphoglycerate mutase	0.250315	0.767644	0.919273
P07741	APRT	APRT	P07741	Adenine phosphoribosyltransferase	0.848103	0.389752	-0.418654
P07814	EPRS	EPRS	P07814	Bifunctional glutamate/proline--tRNA ligase;Glutamate--tRNA ligase;Proline--tRNA ligase	0.868653	0.381726	0.313182
P07858	CTSB	CTSB	P07858	Cathepsin B;Cathepsin B light chain;Cathepsin B heavy chain	0.750806	0.43038	-0.289558
P07900	HSP90AA1	HSP90AA1	P07900;Q58FG0;Q58FG1	Heat shock protein HSP 90-alpha	0.328489	0.688958	-0.216177
P07910	HNRNPC	HNRNPC;HNRNPCL1;HNRNPCL2;HNRNPCL4;HNRNPCL3	P07910;O60812;B2RXH8;P0DMR1;B7ZW38;Q86SE5	Heterogeneous nuclear ribonucleoproteins C1/C2;Heterogeneous nuclear ribonucleoprotein C-like 1;Heterogeneous nuclear ribonucleoprotein C-like 2;Heterogeneous nuclear ribonucleoprotein C-like 4;Heterogeneous nuclear ribonucleoprotein C-like 3	0.0257483	0.969288	0.0243219
P07942	LAMB1	LAMB1	P07942	Laminin subunit beta-1	0.428753	0.609162	-0.725939
P07954	FH	FH	P07954	Fumarate hydratase, mitochondrial	0.422864	0.61155	0.185803
P08123	COL1A2	COL1A2	P08123	Collagen alpha-2(I) chain	0.0281779	0.969487	0.101017
P08133	ANXA6	ANXA6	P08133	Annexin A6	1.69568	0.197009	-0.567422
P08134	RHOC	RHOC	P08134	Rho-related GTP-binding protein RhoC	0.0948016	0.909348	-0.0834967
P08195	SLC3A2	SLC3A2	P08195	4F2 cell-surface antigen heavy chain	0.0148725	0.981249	-0.0211563
P08237	PFKM	PFKM	P08237	ATP-dependent 6-phosphofructokinase, muscle type	0.308857	0.70623	0.304546
P08238	HSP90AB1	HSP90AB1	P08238	Heat shock protein HSP 90-beta	2.26802	0.165978	-0.559223
P08240	SRPR	SRPR	P08240	Signal recognition particle receptor subunit alpha	0.25179	0.766316	-0.405865
P08243	ASNS	ASNS	P08243	Asparagine synthetase [glutamine-hydrolyzing]	0.24912	0.769646	-0.414798
P08253	MMP2	MMP2	P08253	72 kDa type IV collagenase;PEX	0.39334	0.632371	0.549865
P08397	HMBS	HMBS	P08397	Porphobilinogen deaminase	0.325427	0.690945	1.0394
P08473	MME	MME	P08473	Neprilysin	0.422573	0.611112	-0.940339
P08559	PDHA1	PDHA1	P08559;P29803	Pyruvate dehydrogenase E1 component subunit alpha, somatic form, mitochondrial	1.79787	0.187015	-0.489169
P08574	CYC1	CYC1	P08574	Cytochrome c1, heme protein, mitochondrial	0.662065	0.469208	0.909557
P08579	SNRPB2	SNRPB2	P08579	U2 small nuclear ribonucleoprotein B	0.421843	0.611595	-1.2762
P08621	SNRNP70	SNRNP70	P08621	U1 small nuclear ribonucleoprotein 70 kDa	1.19781	0.290476	-1.82122
P08648	ITGA5	ITGA5	P08648	Integrin alpha-5;Integrin alpha-5 heavy chain;Integrin alpha-5 light chain	0.591417	0.509619	-0.423678
P08651	NFIC	NFIC	P08651	Nuclear factor 1 C-type	0.0680265	0.934539	-0.14442
P08670	VIM	VIM	P08670;P41219;P07197;Q16352;CON__Q9H552;P14136;P78386;P07196;Q8N1N4;CON__Q61726;CON__P78386;P78385;CON__H-INV:HIT000292931;CON__Q7RTT2;CON__Q6NT21;CON__P78385;CON__Q8N1N4-2	Vimentin	1.55329	0.220481	0.496755
P08708	RPS17	RPS17	P08708	40S ribosomal protein S17	0.992372	0.355723	-0.800944
P08754	GNAI3	GNAI3	P08754;P09471	Guanine nucleotide-binding protein G(k) subunit alpha	1.76193	0.187502	-0.928257
P08758	ANXA5	ANXA5	P08758	Annexin A5	0.850171	0.389033	-0.356495
P08865	RPSA	RPSA	P08865	40S ribosomal protein SA	0.405574	0.624399	0.406949
P08910	ABHD2	ABHD2	P08910	Abhydrolase domain-containing protein 2	1.92642	0.177266	-1.94596
P09001	MRPL3	MRPL3	P09001	39S ribosomal protein L3, mitochondrial	0.0794418	0.923961	-0.337532
P09012	SNRPA	SNRPA	P09012	U1 small nuclear ribonucleoprotein A	2.41818	0.166121	-2.64156
P09104	ENO2	ENO2	P09104;P13929	Gamma-enolase	0.387232	0.633978	-0.292543
P09110	ACAA1	ACAA1	P09110	3-ketoacyl-CoA thiolase, peroxisomal	0.957771	0.361446	0.744447
P09211	GSTP1	GSTP1	P09211	Glutathione S-transferase P	0.207705	0.812862	0.166325
P09382	LGALS1	LGALS1	P09382	Galectin-1	0.666704	0.465063	0.525016
P09417	QDPR	QDPR	P09417	Dihydropteridine reductase	0.593234	0.509309	1.35742
P09429	HMGB1	HMGB1	P09429;B2RPK0	High mobility group protein B1	0.871844	0.382308	-1.45593
P09486	SPARC	SPARC	P09486	SPARC	0.891788	0.378758	1.89907
P09488	GSTM1	GSTM1	P09488;P46439	Glutathione S-transferase Mu 1	0.249051	0.769567	-0.319106
P09493	TPM1	TPM1	P09493	Tropomyosin alpha-1 chain	0.0418285	0.957074	0.14522
P09496	CLTA	CLTA	P09496	Clathrin light chain A	0.136397	0.874049	-0.153011
P09525	ANXA4	ANXA4	P09525	Annexin A4	0.243159	0.774683	-0.144179
P09543	CNP	CNP	P09543	2,3-cyclic-nucleotide 3-phosphodiesterase	0.971811	0.360533	0.732129
P09619	PDGFRB	PDGFRB	P09619	Platelet-derived growth factor receptor beta	0.18709	0.831737	-0.182342
P09622	DLD	DLD	P09622	Dihydrolipoyl dehydrogenase, mitochondrial	0.572337	0.519528	0.795332
P09651	HNRNPA1	HNRNPA1;HNRNPA1L2	P09651;A0A2R8Y4L2;Q32P51	Heterogeneous nuclear ribonucleoprotein A1;Heterogeneous nuclear ribonucleoprotein A1, N-terminally processed;Heterogeneous nuclear ribonucleoprotein A1-like 2	1.10997	0.319463	-3.13067
P09661	SNRPA1	SNRPA1	P09661	U2 small nuclear ribonucleoprotein A	1.33388	0.261514	-1.55175
P09874	PARP1	PARP1	P09874	Poly [ADP-ribose] polymerase 1	0.0326816	0.965241	0.0427697
P09936	UCHL1	UCHL1	P09936	Ubiquitin carboxyl-terminal hydrolase isozyme L1	0.882405	0.380782	0.574343
P09960	LTA4H	LTA4H	P09960	Leukotriene A-4 hydrolase	0.566433	0.52095	-0.36024
P09972	ALDOC	ALDOC	P09972	Fructose-bisphosphate aldolase C	1.30133	0.263079	1.64268
Q71UI9	H2AFV	H2AFV;H2AFZ	Q71UI9;P0C0S5	Histone H2A.V;Histone H2A.Z	1.57596	0.220029	-4.8369
P0CG30	GSTT2B	GSTT2B;GSTT2	P0CG30;P0CG29	Glutathione S-transferase theta-2B;Glutathione S-transferase theta-2	1.87597	0.181225	-1.84898
P0DMV9	HSPA1B	HSPA1B;HSPA1A	P0DMV9;P0DMV8	Heat shock 70 kDa protein 1B;Heat shock 70 kDa protein 1A	1.80403	0.186383	-0.438701
P0DP25	CALM3	CALM3	P0DP25;P0DP24;P0DP23		0.0199122	0.974374	-0.096964
P10155	TROVE2	TROVE2	P10155	60 kDa SS-A/Ro ribonucleoprotein	0.127268	0.881046	-0.115692
P10253	GAA	GAA	P10253	Lysosomal alpha-glucosidase;76 kDa lysosomal alpha-glucosidase;70 kDa lysosomal alpha-glucosidase	0.460686	0.584815	-0.725336
P10301	RRAS	RRAS	P10301	Ras-related protein R-Ras	0.738492	0.432687	-0.373437
P10321	HLA-C	HLA-C	P10321	HLA class I histocompatibility antigen, Cw-7 alpha chain	2.62286	0.150261	-2.37799
P10515	DLAT	DLAT	P10515	Dihydrolipoyllysine-residue acetyltransferase component of pyruvate dehydrogenase complex, mitochondrial	0.20093	0.817862	-0.115046
P10599	TXN	TXN	P10599	Thioredoxin	0.280002	0.735385	-0.28961
P10619	CTSA	CTSA	P10619	Lysosomal protective protein;Lysosomal protective protein 32 kDa chain;Lysosomal protective protein 20 kDa chain	0.980883	0.358837	-1.12822
P10620	MGST1	MGST1	P10620	Microsomal glutathione S-transferase 1	1.28513	0.268446	-1.95704
P10644	PRKAR1A	PRKAR1A	P10644	cAMP-dependent protein kinase type I-alpha regulatory subunit;cAMP-dependent protein kinase type I-alpha regulatory subunit, N-terminally processed	0.14581	0.86576	0.139029
P10768	ESD	ESD	P10768	S-formylglutathione hydrolase	0.422744	0.611325	-0.364009
P10809	HSPD1	HSPD1	P10809	60 kDa heat shock protein, mitochondrial	1.09	0.329007	-0.327606
P11021	HSPA5	HSPA5	P11021	78 kDa glucose-regulated protein	1.02235	0.345467	-0.402845
P11047	LAMC1	LAMC1	P11047	Laminin subunit gamma-1	0.254363	0.764063	0.655895
P11117	ACP2	ACP2	P11117	Lysosomal acid phosphatase	0.32129	0.695267	-0.192261
P11142	HSPA8	HSPA8	P11142	Heat shock cognate 71 kDa protein	1.63039	0.216597	-0.208033
P11166	SLC2A1	SLC2A1	P11166	Solute carrier family 2, facilitated glucose transporter member 1	0.85555	0.388126	-0.762773
P11172	UMPS	UMPS	P11172	Uridine 5-monophosphate synthase;Orotate phosphoribosyltransferase;Orotidine 5-phosphate decarboxylase	1.7889	0.18464	1.48226
P11177	PDHB	PDHB	P11177	Pyruvate dehydrogenase E1 component subunit beta, mitochondrial	1.23512	0.278441	-1.31801
P11182	DBT	DBT	P11182	Lipoamide acyltransferase component of branched-chain alpha-keto acid dehydrogenase complex, mitochondrial	0.213202	0.80987	-0.419603
P11216	PYGB	PYGB	P11216	Glycogen phosphorylase, brain form	0.25347	0.764622	-0.154032
P11233	RALA	RALA	P11233	Ras-related protein Ral-A	1.16872	0.301516	-1.62144
P11279	LAMP1	LAMP1	P11279	Lysosome-associated membrane glycoprotein 1	0.132615	0.878237	0.144924
P11310	ACADM	ACADM	P11310	Medium-chain specific acyl-CoA dehydrogenase, mitochondrial	0.0728936	0.931327	0.0644309
P11387	TOP1	TOP1	P11387;Q969P6	DNA topoisomerase 1	0.100241	0.903658	-0.379974
P11413	G6PD	G6PD	P11413	Glucose-6-phosphate 1-dehydrogenase	0.281492	0.734304	-0.201084
P11498	PC	PC	P11498	Pyruvate carboxylase, mitochondrial	0.997962	0.353713	-0.442112
P11586	MTHFD1	MTHFD1	P11586	C-1-tetrahydrofolate synthase, cytoplasmic;Methylenetetrahydrofolate dehydrogenase;Methenyltetrahydrofolate cyclohydrolase;Formyltetrahydrofolate synthetase;C-1-tetrahydrofolate synthase, cytoplasmic, N-terminally processed	0.81669	0.399615	-0.248196
P11717	IGF2R	IGF2R	P11717	Cation-independent mannose-6-phosphate receptor	0.269935	0.745867	0.590414
P11766	ADH5	ADH5	P11766	Alcohol dehydrogenase class-3	0.168891	0.845251	0.141597
P11940	PABPC1	PABPC1	P11940;Q9H361;Q4VXU2;Q96DU9	Polyadenylate-binding protein 1	1.26266	0.272907	-0.608363
P12004	PCNA	PCNA	P12004	Proliferating cell nuclear antigen	3.00605	0.14781	-1.1569
P12081	HARS	HARS	P12081;P49590	Histidine--tRNA ligase, cytoplasmic	0.116039	0.89394	0.119879
P12109	COL6A1	COL6A1	P12109	Collagen alpha-1(VI) chain	0.997003	0.352434	-1.01016
P12110	COL6A2	COL6A2	P12110	Collagen alpha-2(VI) chain	0.206797	0.813441	-0.326529
P12111	COL6A3	COL6A3	P12111	Collagen alpha-3(VI) chain	0.0127809	0.981862	0.0115687
P12235	SLC25A4	SLC25A4	P12235	ADP/ATP translocase 1	0.785867	0.410874	-2.29522
P12236	SLC25A6	SLC25A6	P12236;Q9H0C2	ADP/ATP translocase 3;ADP/ATP translocase 3, N-terminally processed	1.63349	0.217166	-0.831473
P12268	IMPDH2	IMPDH2	P12268	Inosine-5-monophosphate dehydrogenase 2	2.65972	0.161854	0.202854
P12270	TPR	TPR	P12270	Nucleoprotein TPR	0.342902	0.676815	0.331149
P12277	CKB	CKB	P12277	Creatine kinase B-type	0.172084	0.843699	0.237104
P12694	BCKDHA	BCKDHA	P12694	2-oxoisovalerate dehydrogenase subunit alpha, mitochondrial	0.79866	0.410645	1.03411
P12814	ACTN1	ACTN1	P12814	Alpha-actinin-1	1.18046	0.297302	-0.460232
P12931	SRC	SRC	P12931	Proto-oncogene tyrosine-protein kinase Src	0.201711	0.817755	-0.38505
P12955	PEPD	PEPD	P12955	Xaa-Pro dipeptidase	0.296768	0.72187	-0.167185
P12956	XRCC6	XRCC6	P12956	X-ray repair cross-complementing protein 6	0.572866	0.519564	-0.291708
P13010	XRCC5	XRCC5	P13010	X-ray repair cross-complementing protein 5	0.69244	0.4537	-0.182828
P13073	COX4I1	COX4I1	P13073	Cytochrome c oxidase subunit 4 isoform 1, mitochondrial	0.462281	0.585408	1.18706
P13473	LAMP2	LAMP2	P13473	Lysosome-associated membrane glycoprotein 2	0.326985	0.689598	0.229221
P13489	RNH1	RNH1	P13489	Ribonuclease inhibitor	3.17555	0.161867	-0.449231
P13639	EEF2	EEF2	P13639	Elongation factor 2	0.087257	0.918788	0.0357119
P13667	PDIA4	PDIA4	P13667	Protein disulfide-isomerase A4	0.0791237	0.924099	-0.0621605
P13674	P4HA1	P4HA1	P13674	Prolyl 4-hydroxylase subunit alpha-1	0.177508	0.839191	0.360958
P13693	TPT1	TPT1	P13693;Q9HAU6;Q56UQ5	Translationally-controlled tumor protein	0.0492083	0.952036	0.121213
P13716	ALAD	ALAD	P13716	Delta-aminolevulinic acid dehydratase	0.757473	0.427976	-0.364368
P13797	PLS3	PLS3	P13797;P13796;Q14651	Plastin-3	2.28582	0.15991	-0.339343
P13798	APEH	APEH	P13798	Acylamino-acid-releasing enzyme	1.28779	0.26726	-0.621236
P13804	ETFA	ETFA	P13804	Electron transfer flavoprotein subunit alpha, mitochondrial	0.815339	0.399255	0.658601
P13807	GYS1	GYS1	P13807	Glycogen [starch] synthase, muscle	0.211853	0.809424	0.0858752
P13861	PRKAR2A	PRKAR2A	P13861;P31323	cAMP-dependent protein kinase type II-alpha regulatory subunit	0.722096	0.43644	-0.814636
P13987	CD59	CD59	P13987	CD59 glycoprotein	1.59588	0.222186	2.82025
P13995	MTHFD2	MTHFD2	P13995	Bifunctional methylenetetrahydrofolate dehydrogenase/cyclohydrolase, mitochondrial;NAD-dependent methylenetetrahydrofolate dehydrogenase;Methenyltetrahydrofolate cyclohydrolase	0.172654	0.84314	0.460437
P14174	MIF	MIF	P14174	Macrophage migration inhibitory factor	0.771502	0.418453	0.66309
P14314	PRKCSH	PRKCSH	P14314	Glucosidase 2 subunit beta	1.59872	0.221354	-1.25478
P14324	FDPS	FDPS	P14324	Farnesyl pyrophosphate synthase	1.46111	0.242985	-0.840542
P14384	CPM	CPM	P14384	Carboxypeptidase M	0.50639	0.55863	1.18939
P14550	AKR1A1	AKR1A1	P14550	Alcohol dehydrogenase [NADP(+)]	0.980125	0.357497	0.709202
P14618	PKM	PKM	P14618;P30613	Pyruvate kinase PKM	0.575661	0.518105	-0.183896
P14625	HSP90B1	HSP90B1	P14625	Endoplasmin	0.174983	0.840264	-0.0822016
P63162	SNRPN	SNRPN;SNRPB	P63162;P14678	Small nuclear ribonucleoprotein-associated protein N;Small nuclear ribonucleoprotein-associated proteins B and B	0.125319	0.883337	-0.23638
P14735	IDE	IDE	P14735	Insulin-degrading enzyme	0.162767	0.850165	0.110345
P14866	HNRNPL	HNRNPL	P14866	Heterogeneous nuclear ribonucleoprotein L	2.15775	0.174438	-1.35916
P14868	DARS	DARS	P14868	Aspartate--tRNA ligase, cytoplasmic	2.6632	0.170154	-0.873737
P15104	GLUL	GLUL	P15104	Glutamine synthetase	0.585909	0.514301	-0.733257
P15121	AKR1B1	AKR1B1	P15121	Aldose reductase	0.102169	0.901135	0.08848
P15144	ANPEP	ANPEP	P15144	Aminopeptidase N	0.671823	0.462454	-0.569355
P15170	GSPT1	GSPT1	P15170	Eukaryotic peptide chain release factor GTP-binding subunit ERF3A	0.432567	0.604878	0.731336
P15289	ARSA	ARSA	P15289	Arylsulfatase A;Arylsulfatase A component B;Arylsulfatase A component C	1.11715	0.317174	1.57338
P15291	B4GALT1	B4GALT1	P15291	Beta-1,4-galactosyltransferase 1;Lactose synthase A protein;N-acetyllactosamine synthase;Beta-N-acetylglucosaminylglycopeptide beta-1,4-galactosyltransferase;Beta-N-acetylglucosaminyl-glycolipid beta-1,4-galactosyltransferase;Processed beta-1,4-galactosyltransferase 1	0.0897174	0.91672	-0.14145
P15311	EZR	EZR	P15311	Ezrin	1.35546	0.259044	0.444566
P15374	UCHL3	UCHL3	P15374	Ubiquitin carboxyl-terminal hydrolase isozyme L3	0.0906551	0.915897	-0.250331
P15531	NME1	NME1	P15531	Nucleoside diphosphate kinase A	1.57897	0.218509	-2.97665
P15586	GNS	GNS	P15586	N-acetylglucosamine-6-sulfatase	0.546805	0.535303	0.294797
P15848	ARSB	ARSB	P15848	Arylsulfatase B	0.39503	0.630957	-0.367368
P15880	RPS2	RPS2	P15880	40S ribosomal protein S2	0.0375652	0.962642	0.0334899
P15924	DSP	DSP	P15924	Desmoplakin	1.14295	0.304533	1.01856
P15927	RPA2	RPA2	P15927	Replication protein A 32 kDa subunit	0.397014	0.628422	-0.5772
P16070	CD44	CD44	P16070	CD44 antigen	0.959309	0.361385	-1.65772
P16083	NQO2	NQO2	P16083	Ribosyldihydronicotinamide dehydrogenase [quinone]	0.0453867	0.955573	-0.0444221
P16104	H2AFX	H2AFX;HIST1H2AA;HIST2H2AB	P16104;Q96QV6;Q8IUE6	Histone H2AX;Histone H2A type 1-A;Histone H2A type 2-B	0.336221	0.682367	-1.30654
P16152	CBR1	CBR1	P16152	Carbonyl reductase [NADPH] 1	0.118582	0.890935	0.100128
P16219	ACADS	ACADS	P16219	Short-chain specific acyl-CoA dehydrogenase, mitochondrial	0.676009	0.463385	-1.46909
P16234	PDGFRA	PDGFRA	P16234	Platelet-derived growth factor receptor alpha	0.377758	0.644335	1.30766
P16278	GLB1	GLB1	P16278	Beta-galactosidase	0.498055	0.562718	0.325487
P16383	GCFC2	GCFC2	P16383	GC-rich sequence DNA-binding factor 2	0.0447095	0.955299	0.0640645
P16401	HIST1H1B	HIST1H1B	P16401	Histone H1.5	1.89984	0.182815	3.85467
P16403	HIST1H1C	HIST1H1C	P16403	Histone H1.2	2.09505	0.173076	4.25534
P16435	POR	POR	P16435	NADPH--cytochrome P450 reductase	0.785394	0.41095	-0.496055
P16615	ATP2A2	ATP2A2	P16615;O14983;Q93084	Sarcoplasmic/endoplasmic reticulum calcium ATPase 2	0.58899	0.512812	0.318704
P16930	FAH	FAH	P16930	Fumarylacetoacetase	0.803713	0.408906	0.647854
P16989	YBX3	YBX3	P16989	Y-box-binding protein 3	0.7752	0.415225	0.841012
P17050	NAGA	NAGA	P17050	Alpha-N-acetylgalactosaminidase	1.56189	0.220791	-0.734424
P17066	HSPA6	HSPA6;HSPA7	P17066;P48741	Heat shock 70 kDa protein 6;Putative heat shock 70 kDa protein 7	0.433154	0.605282	-2.10573
P17096	HMGA1	HMGA1	P17096	High mobility group protein HMG-I/HMG-Y	0.671016	0.461807	2.48643
P17174	GOT1	GOT1	P17174	Aspartate aminotransferase, cytoplasmic	0.650053	0.475087	0.792691
P17252	PRKCA	PRKCA	P17252;P05129	Protein kinase C alpha type	0.00325341	0.996206	-0.0102914
P17301	ITGA2	ITGA2	P17301	Integrin alpha-2	0.563323	0.522615	1.58699
P17302	GJA1	GJA1	P17302	Gap junction alpha-1 protein	0.79198	0.411091	2.16512
P17405	SMPD1	SMPD1	P17405	Sphingomyelin phosphodiesterase	0.274272	0.740874	0.445867
P17480	UBTF	UBTF	P17480	Nucleolar transcription factor 1	0.910731	0.375913	1.40173
P17612	PRKACA	PRKACA	P17612	cAMP-dependent protein kinase catalytic subunit alpha	0.216205	0.805156	0.134952
P17655	CAPN2	CAPN2	P17655	Calpain-2 catalytic subunit	1.58932	0.218798	-0.654809
P17661	DES	DES	P17661	Desmin	0.312068	0.702465	0.7051
P17812	CTPS1	CTPS1	P17812	CTP synthase 1	0.225403	0.794421	-0.229314
P17813	ENG	ENG	P17813	Endoglin	0.10684	0.89904	0.310037
P17844	DDX5	DDX5	P17844	Probable ATP-dependent RNA helicase DDX5	0.0570628	0.944859	0.0925935
P17858	PFKL	PFKL	P17858	ATP-dependent 6-phosphofructokinase, liver type	0.869169	0.382791	-0.673324
P17900	GM2A	GM2A	P17900	Ganglioside GM2 activator;Ganglioside GM2 activator isoform short	0.000964591	0.998459	0.00438507
P17931	LGALS3	LGALS3	P17931	Galectin-3	0.364315	0.655589	0.2773
P17980	PSMC3	PSMC3	P17980	26S protease regulatory subunit 6A	1.36211	0.260568	0.465141
P17987	TCP1	TCP1	P17987	T-complex protein 1 subunit alpha	0.317117	0.699263	-0.142546
P18031	PTPN1	PTPN1	P18031	Tyrosine-protein phosphatase non-receptor type 1	2.51659	0.154069	-1.64039
P18074	ERCC2	ERCC2	P18074	TFIIH basal transcription factor complex helicase XPD subunit	0.728289	0.435928	1.23657
P18084	ITGB5	ITGB5	P18084	Integrin beta-5	0.178712	0.838318	0.849996
P18085	ARF4	ARF4	P18085	ADP-ribosylation factor 4	1.50367	0.236598	-3.35153
P18124	RPL7	RPL7	P18124	60S ribosomal protein L7	0.745236	0.431226	0.372499
P18206	VCL	VCL	P18206	Vinculin	0.219182	0.803344	0.10345
P18583	SON	SON	P18583	Protein SON	0.565582	0.521041	-0.657319
P18621	RPL17	RPL17	P18621	60S ribosomal protein L17	0.0140203	0.981724	-0.0250003
P18669	PGAM1	PGAM1	P18669;Q8N0Y7	Phosphoglycerate mutase 1	0.325447	0.69124	-0.201355
P18754	RCC1	RCC1	P18754	Regulator of chromosome condensation	2.12403	0.1775	-1.50819
P19022	CDH2	CDH2	P19022;P55283	Cadherin-2	0.384264	0.637683	1.17566
P19174	PLCG1	PLCG1	P19174	1-phosphatidylinositol 4,5-bisphosphate phosphodiesterase gamma-1	1.08867	0.329262	0.935464
P19338	NCL	NCL	P19338	Nucleolin	0.540194	0.538388	-0.332361
P19367	HK1	HK1	P19367;Q2TB90	Hexokinase-1	0.374302	0.647048	-0.202745
P19387	POLR2C	POLR2C	P19387	DNA-directed RNA polymerase II subunit RPB3	0.343436	0.677047	-0.46058
P19404	NDUFV2	NDUFV2	P19404	NADH dehydrogenase [ubiquinone] flavoprotein 2, mitochondrial	0.212479	0.809418	0.545348
P19474	TRIM21	TRIM21	P19474	E3 ubiquitin-protein ligase TRIM21	0.574717	0.518575	0.550259
P19525	EIF2AK2	EIF2AK2	P19525	Interferon-induced, double-stranded RNA-activated protein kinase	1.11042	0.319692	-0.623512
P19623	SRM	SRM	P19623	Spermidine synthase	0.731405	0.434163	0.425072
P19784	CSNK2A2	CSNK2A2	P19784	Casein kinase II subunit alpha	0.442259	0.599194	0.610931
P19838	NFKB1	NFKB1	P19838	Nuclear factor NF-kappa-B p105 subunit;Nuclear factor NF-kappa-B p50 subunit	1.16799	0.302131	1.26038
P19971	TYMP	TYMP	P19971	Thymidine phosphorylase	0.748227	0.431518	-0.928209
P20020	ATP2B1	ATP2B1	P20020	Plasma membrane calcium-transporting ATPase 1	1.64953	0.211557	0.815185
P20042	EIF2S2	EIF2S2	P20042	Eukaryotic translation initiation factor 2 subunit 2	0.19548	0.825255	-0.242721
P20073	ANXA7	ANXA7	P20073	Annexin A7	0.0571916	0.945428	-0.0517069
P20290	BTF3	BTF3	P20290	Transcription factor BTF3	0.0540978	0.94916	-0.0300344
P20339	RAB5A	RAB5A	P20339	Ras-related protein Rab-5A	0.960603	0.363232	-1.20842
P20340	RAB6A	RAB6A;RAB6B	P20340;Q9NRW1	Ras-related protein Rab-6A;Ras-related protein Rab-6B	0.00159718	0.99784	-0.00341733
P20618	PSMB1	PSMB1	P20618	Proteasome subunit beta type-1	0.795671	0.41211	-1.98667
P20645	M6PR	M6PR	P20645	Cation-dependent mannose-6-phosphate receptor	1.17366	0.301445	-1.35475
P20700	LMNB1	LMNB1	P20700	Lamin-B1	0.099098	0.904584	0.156162
P20810	CAST	CAST	P20810	Calpastatin	1.40517	0.253099	0.607454
P20936	RASA1	RASA1	P20936	Ras GTPase-activating protein 1	0.343076	0.677234	0.169322
P21127	CDK11B	CDK11B;CDK11A	P21127;Q9UQ88	Cyclin-dependent kinase 11B;Cyclin-dependent kinase 11A	0.841725	0.389478	1.0011
P21266	GSTM3	GSTM3	P21266	Glutathione S-transferase Mu 3	2.26232	0.165	-1.13463
P21281	ATP6V1B2	ATP6V1B2	P21281;P15313	V-type proton ATPase subunit B, brain isoform	0.152266	0.858571	0.129812
P21283	ATP6V1C1	ATP6V1C1	P21283	V-type proton ATPase subunit C 1	0.208834	0.812406	-0.31094
P21291	CSRP1	CSRP1	P21291	Cysteine and glycine-rich protein 1	1.58664	0.219729	-2.21024
P21333	FLNA	FLNA	P21333	Filamin-A	0.386126	0.635072	-0.173636
P21397	MAOA	MAOA	P21397	Amine oxidase [flavin-containing] A	0.595175	0.508369	-1.31239
P21399	ACO1	ACO1	P21399	Cytoplasmic aconitate hydratase	1.01988	0.344848	0.403268
P21589	NT5E	NT5E	P21589	5-nucleotidase	0.0803108	0.922687	-0.0626246
P21796	VDAC1	VDAC1	P21796	Voltage-dependent anion-selective channel protein 1	1.40248	0.253994	-0.560969
P21810	BGN	BGN	P21810	Biglycan	0.244451	0.774491	0.325681
P21912	SDHB	SDHB	P21912	Succinate dehydrogenase [ubiquinone] iron-sulfur subunit, mitochondrial	0.0476861	0.953561	-0.170073
P21926	CD9	CD9	P21926	CD9 antigen	0.335601	0.682449	-0.214193
P21953	BCKDHB	BCKDHB	P21953	2-oxoisovalerate dehydrogenase subunit beta, mitochondrial	0.0349445	0.964577	-0.107276
P21964	COMT	COMT	P21964	Catechol O-methyltransferase	0.0560882	0.946472	0.0446097
P21980	TGM2	TGM2	P21980;P49221;O43548	Protein-glutamine gamma-glutamyltransferase 2	2.62699	0.1536	-0.649932
P22033	MUT	MUT	P22033	Methylmalonyl-CoA mutase, mitochondrial	0.117235	0.89214	-0.318055
P22059	OSBP	OSBP	P22059	Oxysterol-binding protein 1	0.427888	0.609267	0.331264
P22061	PCMT1	PCMT1	P22061	Protein-L-isoaspartate(D-aspartate) O-methyltransferase	1.70071	0.197351	-1.27672
P22087	FBL	FBL	P22087	rRNA 2-O-methyltransferase fibrillarin	0.556549	0.527245	0.695523
P22090	RPS4Y1	RPS4Y1	P22090	40S ribosomal protein S4, Y isoform 1	0.107374	0.899111	0.327541
P22102	GART	GART	P22102	Trifunctional purine biosynthetic protein adenosine-3;Phosphoribosylamine--glycine ligase;Phosphoribosylformylglycinamidine cyclo-ligase;Phosphoribosylglycinamide formyltransferase	0.171813	0.843374	-0.0616423
P22234	PAICS	PAICS	P22234	Multifunctional protein ADE2;Phosphoribosylaminoimidazole-succinocarboxamide synthase;Phosphoribosylaminoimidazole carboxylase	0.629771	0.490323	-0.218377
P22307	SCP2	SCP2	P22307	Non-specific lipid-transfer protein	0.0246373	0.969695	-0.0375125
P22314	UBA1	UBA1	P22314	Ubiquitin-like modifier-activating enzyme 1	1.12553	0.312204	-0.362408
P22392	NME2	NME2;NME2P1	P22392;O60361	Nucleoside diphosphate kinase B;Putative nucleoside diphosphate kinase	0.685015	0.457632	-0.55374
P22413	ENPP1	ENPP1	P22413	Ectonucleotide pyrophosphatase/phosphodiesterase family member 1;Alkaline phosphodiesterase I;Nucleotide pyrophosphatase	0.135184	0.874853	-0.451767
P22570	FDXR	FDXR	P22570	NADPH:adrenodoxin oxidoreductase, mitochondrial	0.43857	0.601423	0.372764
P22626	HNRNPA2B1	HNRNPA2B1	P22626	Heterogeneous nuclear ribonucleoproteins A2/B1	1.36916	0.259819	-0.507272
P22694	PRKACB	PRKACB	P22694	cAMP-dependent protein kinase catalytic subunit beta	1.17566	0.301053	1.13912
P22695	UQCRC2	UQCRC2	P22695	Cytochrome b-c1 complex subunit 2, mitochondrial	0.920309	0.373956	-0.415152
P22830	FECH	FECH	P22830	Ferrochelatase, mitochondrial	0.491603	0.56833	-0.425639
P23141	CES1	CES1	P23141;Q9UKY3	Liver carboxylesterase 1	1.0655	0.330594	-1.92085
P23193	TCEA1	TCEA1	P23193;Q15560	Transcription elongation factor A protein 1	0.475725	0.575724	-1.1757
P23246	SFPQ	SFPQ	P23246	Splicing factor, proline- and glutamine-rich	0.691269	0.454776	-0.339764
P23258	TUBG1	TUBG1;TUBG2	P23258;Q9NRH3	Tubulin gamma-1 chain;Tubulin gamma-2 chain	1.48807	0.235757	-0.81499
P23284	PPIB	PPIB	P23284	Peptidyl-prolyl cis-trans isomerase B	1.52979	0.229163	-0.769161
P23368	ME2	ME2	P23368	NAD-dependent malic enzyme, mitochondrial	0.191414	0.829284	-0.304584
P23381	WARS	WARS	P23381	Tryptophan--tRNA ligase, cytoplasmic;T1-TrpRS;T2-TrpRS	0.784478	0.409668	0.437904
P23396	RPS3	RPS3	P23396	40S ribosomal protein S3	0.126978	0.880734	0.0772438
P23458	JAK1	JAK1	P23458	Tyrosine-protein kinase JAK1	1.49718	0.237705	-3.03505
P23497	SP100	SP100	P23497;Q9H930	Nuclear autoantigen Sp-100	0.177671	0.839201	-0.262218
P23526	AHCY	AHCY	P23526	Adenosylhomocysteinase	0.851098	0.388476	1.01699
Q16778	HIST2H2BE	HIST2H2BE;HIST1H2BB;HIST1H2BO;HIST1H2BJ;HIST3H2BB	Q16778;P33778;P23527;P06899;Q8N257;Q96A08;Q6DRA6;Q6DN03	Histone H2B type 2-E;Histone H2B type 1-B;Histone H2B type 1-O;Histone H2B type 1-J;Histone H2B type 3-B	0.185144	0.833577	-0.411516
P23528	CFL1	CFL1	P23528	Cofilin-1	0.31963	0.697279	-0.270122
P23588	EIF4B	EIF4B	P23588	Eukaryotic translation initiation factor 4B	0.758432	0.42752	-2.28883
P23634	ATP2B4	ATP2B4	P23634;Q16720;Q01814	Plasma membrane calcium-transporting ATPase 4	0.0122442	0.983051	0.0100365
P23743	DGKA	DGKA	P23743	Diacylglycerol kinase alpha	0.112629	0.896314	-0.267623
P23786	CPT2	CPT2	P23786	Carnitine O-palmitoyltransferase 2, mitochondrial	0.0891817	0.916612	-0.115738
P24534	EEF1B2	EEF1B2	P24534	Elongation factor 1-beta	0.0270418	0.970468	0.0328795
P24539	ATP5F1	ATP5F1	P24539	ATP synthase F(0) complex subunit B1, mitochondrial	0.203228	0.815667	-0.329754
P24666	ACP1	ACP1	P24666	Low molecular weight phosphotyrosine protein phosphatase	0.309398	0.70583	-0.516412
P24752	ACAT1	ACAT1	P24752	Acetyl-CoA acetyltransferase, mitochondrial	1.25419	0.275641	0.598773
P24844	MYL9	MYL9	P24844	Myosin regulatory light polypeptide 9	0.888917	0.379037	-1.96477
P24928	POLR2A	POLR2A	P24928	DNA-directed RNA polymerase II subunit RPB1	0.0188215	0.976143	0.0486883
P25325	MPST	MPST	P25325	3-mercaptopyruvate sulfurtransferase	0.904435	0.374986	1.79945
P25398	RPS12	RPS12	P25398	40S ribosomal protein S12	0.578682	0.516872	-0.397071
P25685	DNAJB1	DNAJB1	P25685	DnaJ homolog subfamily B member 1	0.0120219	0.982977	0.0235519
P25705	ATP5A1	ATP5A1	P25705	ATP synthase subunit alpha, mitochondrial	1.38963	0.256807	0.422372
P25786	PSMA1	PSMA1	P25786	Proteasome subunit alpha type-1	1.29299	0.265931	-0.72377
P25787	PSMA2	PSMA2	P25787	Proteasome subunit alpha type-2	0.344674	0.676221	0.308199
P25788	PSMA3	PSMA3	P25788	Proteasome subunit alpha type-3	0.0896057	0.916529	-0.217894
P25789	PSMA4	PSMA4	P25789	Proteasome subunit alpha type-4	0.568591	0.521383	-0.353831
P26006	ITGA3	ITGA3	P26006	Integrin alpha-3;Integrin alpha-3 heavy chain;Integrin alpha-3 light chain	0.748156	0.431206	-0.627526
P26022	PTX3	PTX3	P26022	Pentraxin-related protein PTX3	1.40344	0.254034	1.41763
P26038	MSN	MSN	P26038	Moesin	0.790442	0.4115	-0.337578
P26196	DDX6	DDX6	P26196	Probable ATP-dependent RNA helicase DDX6	0.927498	0.37255	0.838753
P26232	CTNNA2	CTNNA2	P26232	Catenin alpha-2	0.92284	0.373578	1.08199
P26368	U2AF2	U2AF2	P26368	Splicing factor U2AF 65 kDa subunit	0.0950638	0.909155	-0.0720317
P26373	RPL13	RPL13	P26373	60S ribosomal protein L13	0.232256	0.785723	0.590817
P26440	IVD	IVD	P26440	Isovaleryl-CoA dehydrogenase, mitochondrial	0.40991	0.622461	-1.38546
P26572	MGAT1	MGAT1	P26572	Alpha-1,3-mannosyl-glycoprotein 2-beta-N-acetylglucosaminyltransferase	0.238545	0.777879	0.636247
P26583	HMGB2	HMGB2	P26583	High mobility group protein B2	0.380508	0.639906	-1.32283
P26599	PTBP1	PTBP1	P26599	Polypyrimidine tract-binding protein 1	0.442256	0.598819	0.274477
P26639	TARS	TARS	P26639;A2RTX5	Threonine--tRNA ligase, cytoplasmic	0.480952	0.571658	-0.156976
P26640	VARS	VARS	P26640	Valine--tRNA ligase	0.904227	0.375266	0.212183
P26641	EEF1G	EEF1G	P26641	Elongation factor 1-gamma	0.710277	0.439565	-0.5427
P26885	FKBP2	FKBP2	P26885	Peptidyl-prolyl cis-trans isomerase FKBP2	0.12365	0.885196	-0.146772
P27105	STOM	STOM	P27105	Erythrocyte band 7 integral membrane protein	1.00616	0.349979	-1.43421
P27144	AK4	AK4	P27144	Adenylate kinase 4, mitochondrial	0.471765	0.579573	0.975455
P27348	YWHAQ	YWHAQ	P27348	14-3-3 protein theta	1.44187	0.24634	-1.15026
P27361	MAPK3	MAPK3	P27361	Mitogen-activated protein kinase 3	0.250404	0.76776	-0.301189
P27487	DPP4	DPP4	P27487	Dipeptidyl peptidase 4;Dipeptidyl peptidase 4 membrane form;Dipeptidyl peptidase 4 soluble form	0.605454	0.503622	-0.770163
P27635	RPL10	RPL10	P27635;Q96L21	60S ribosomal protein L10	0.474729	0.57651	-0.892874
P27658	COL8A1	COL8A1	P27658	Collagen alpha-1(VIII) chain;Vastatin	0.463331	0.583597	-1.36913
P27694	RPA1	RPA1	P27694	Replication protein A 70 kDa DNA-binding subunit;Replication protein A 70 kDa DNA-binding subunit, N-terminally processed	0.361624	0.65869	0.519803
P27695	APEX1	APEX1	P27695	DNA-(apurinic or apyrimidinic site) lyase;DNA-(apurinic or apyrimidinic site) lyase, mitochondrial	0.663984	0.467793	0.619485
P27708	CAD	CAD	P27708	CAD protein;Glutamine-dependent carbamoyl-phosphate synthase;Aspartate carbamoyltransferase;Dihydroorotase	1.07319	0.329628	0.538626
P27797	CALR	CALR	P27797	Calreticulin	1.15263	0.30453	-0.570763
P27816	MAP4	MAP4	P27816	Microtubule-associated protein 4	0.0647218	0.937694	0.0448564
P27824	CANX	CANX	P27824;O14967	Calnexin	1.69512	0.196156	-0.485048
P28062	PSMB8	PSMB8	P28062	Proteasome subunit beta type-8	1.08715	0.326758	-1.21151
P28066	PSMA5	PSMA5	P28066	Proteasome subunit alpha type-5	0.113492	0.895649	-0.0636705
P28070	PSMB4	PSMB4	P28070	Proteasome subunit beta type-4	1.5253	0.230178	-1.17827
P28072	PSMB6	PSMB6	P28072	Proteasome subunit beta type-6	3.47	0.1016	-2.89512
P28074	PSMB5	PSMB5	P28074	Proteasome subunit beta type-5	2.47626	0.162733	2.29829
P28161	GSTM2	GSTM2	P28161	Glutathione S-transferase Mu 2	0.680776	0.458055	-1.5377
P28288	ABCD3	ABCD3	P28288	ATP-binding cassette sub-family D member 3	0.240515	0.776219	-0.353512
P28331	NDUFS1	NDUFS1	P28331	NADH-ubiquinone oxidoreductase 75 kDa subunit, mitochondrial	0.0369424	0.962393	-0.06224
P28370	SMARCA1	SMARCA1	P28370	Probable global transcription activator SNF2L1	1.24688	0.278904	0.920408
P28482	MAPK1	MAPK1	P28482	Mitogen-activated protein kinase 1	0.381634	0.639538	0.273772
P28838	LAP3	LAP3	P28838	Cytosol aminopeptidase	0.400944	0.626737	0.241567
P28845	HSD11B1	HSD11B1	P28845	Corticosteroid 11-beta-dehydrogenase isozyme 1	0.460707	0.585192	-2.27584
P29083	GTF2E1	GTF2E1	P29083	General transcription factor IIE subunit 1	0.427917	0.60964	0.539803
P29144	TPP2	TPP2	P29144	Tripeptidyl-peptidase 2	0.418527	0.616506	-0.204048
P29218	IMPA1	IMPA1	P29218	Inositol monophosphatase 1	0.427455	0.609394	-0.267133
P29317	EPHA2	EPHA2	P29317;P54762;P54764;P54760;Q15375;P54753;Q9UF33;P29323	Ephrin type-A receptor 2	1.39092	0.258022	1.37075
P29353	SHC1	SHC1	P29353;P98077	SHC-transforming protein 1	0.856178	0.388084	-0.866232
P29401	TKT	TKT	P29401	Transketolase	1.71953	0.191607	-0.302849
P29558	RBMS1	RBMS1	P29558;Q6XE24	RNA-binding motif, single-stranded-interacting protein 1	0.830878	0.392098	-1.21465
P29590	PML	PML	P29590	Protein PML	0.0968619	0.905947	0.0930119
P29692	EEF1D	EEF1D	P29692	Elongation factor 1-delta	0.95039	0.362323	0.707507
P29966	MARCKS	MARCKS	P29966	Myristoylated alanine-rich C-kinase substrate	1.06902	0.330704	-3.05247
P29992	GNA11	GNA11	P29992;O95837	Guanine nucleotide-binding protein subunit alpha-11	1.5099	0.23596	-0.831236
P30038	ALDH4A1	ALDH4A1	P30038	Delta-1-pyrroline-5-carboxylate dehydrogenase, mitochondrial	0.852836	0.388246	0.428587
P30040	ERP29	ERP29	P30040	Endoplasmic reticulum resident protein 29	0.593247	0.509598	-0.37206
P30041	PRDX6	PRDX6	P30041	Peroxiredoxin-6	1.61499	0.222231	-0.729592
P30043	BLVRB	BLVRB	P30043	Flavin reductase (NADPH)	0.878256	0.380005	-1.21766
P30044	PRDX5	PRDX5	P30044	Peroxiredoxin-5, mitochondrial	0.097455	0.906235	0.0861117
P30046	DDT	DDT;DDTL	P30046;A6NHG4	D-dopachrome decarboxylase;D-dopachrome decarboxylase-like protein	0.374784	0.647414	-0.29214
P30048	PRDX3	PRDX3	P30048	Thioredoxin-dependent peroxide reductase, mitochondrial	0.183732	0.834398	-0.146167
P30050	RPL12	RPL12	P30050	60S ribosomal protein L12	0.483252	0.569697	0.225432
P30084	ECHS1	ECHS1	P30084	Enoyl-CoA hydratase, mitochondrial	0.583734	0.515415	0.350629
P30085	CMPK1	CMPK1	P30085	UMP-CMP kinase	0.970371	0.360782	-1.70228
P30086	PEBP1	PEBP1	P30086	Phosphatidylethanolamine-binding protein 1;Hippocampal cholinergic neurostimulating peptide	1.19625	0.290487	-0.331106
P30101	PDIA3	PDIA3	P30101	Protein disulfide-isomerase A3	0.83115	0.392396	-0.156603
P30153	PPP2R1A	PPP2R1A	P30153	Serine/threonine-protein phosphatase 2A 65 kDa regulatory subunit A alpha isoform	0.390716	0.633088	-0.262143
P30405	PPIF	PPIF	P30405	Peptidyl-prolyl cis-trans isomerase F, mitochondrial	0.88852	0.377909	-1.71508
P30419	NMT1	NMT1	P30419	Glycylpeptide N-tetradecanoyltransferase 1	0.0294239	0.969009	-0.0692876
P30519	HMOX2	HMOX2	P30519	Heme oxygenase 2	0.117959	0.890648	-0.369364
P30520	ADSS	ADSS	P30520;Q8N142	Adenylosuccinate synthetase isozyme 2	0.644781	0.477587	0.753169
P30533	LRPAP1	LRPAP1	P30533	Alpha-2-macroglobulin receptor-associated protein	0.234428	0.782308	-0.559044
P30536	TSPO	TSPO	P30536	Translocator protein	1.1933	0.291168	-1.75764
P30566	ADSL	ADSL	P30566	Adenylosuccinate lyase	0.804649	0.409234	0.579783
P30622	CLIP1	CLIP1	P30622	CAP-Gly domain-containing linker protein 1	2.40662	0.165118	1.87506
P30626	SRI	SRI	P30626	Sorcin	2.16425	0.171269	-1.62315
P30740	SERPINB1	SERPINB1	P30740;O75830	Leukocyte elastase inhibitor	0.137488	0.873203	-0.159174
P30837	ALDH1B1	ALDH1B1	P30837;P00352;O94788	Aldehyde dehydrogenase X, mitochondrial	0.0588679	0.943402	0.0601247
P30876	POLR2B	POLR2B	P30876	DNA-directed RNA polymerase II subunit RPB2	0.113084	0.895697	-0.276143
P31040	SDHA	SDHA	P31040	Succinate dehydrogenase [ubiquinone] flavoprotein subunit, mitochondrial	1.41371	0.255329	-0.59046
P31150	GDI1	GDI1	P31150	Rab GDP dissociation inhibitor alpha	0.182163	0.83469	-0.1107
P31153	MAT2A	MAT2A	P31153;Q00266	S-adenosylmethionine synthase isoform type-2	0.0731693	0.931748	-0.067173
P31327	CPS1	CPS1	P31327	Carbamoyl-phosphate synthase [ammonia], mitochondrial	1.17519	0.300698	0.672752
P31689	DNAJA1	DNAJA1	P31689	DnaJ homolog subfamily A member 1	1.31914	0.26474	1.05384
P31749	AKT1	AKT1	P31749	RAC-alpha serine/threonine-protein kinase	0.789919	0.41165	0.991696
P31751	AKT2	AKT2	P31751	RAC-beta serine/threonine-protein kinase	0.488429	0.568991	0.61559
P31930	UQCRC1	UQCRC1	P31930	Cytochrome b-c1 complex subunit 1, mitochondrial	0.101565	0.901523	0.067735
P31937	HIBADH	HIBADH	P31937	3-hydroxyisobutyrate dehydrogenase, mitochondrial	0.0284096	0.969483	-0.0607268
P31939	ATIC	ATIC	P31939	Bifunctional purine biosynthesis protein PURH;Phosphoribosylaminoimidazolecarboxamide formyltransferase;IMP cyclohydrolase	0.422964	0.611788	0.10152
P31942	HNRNPH3	HNRNPH3	P31942	Heterogeneous nuclear ribonucleoprotein H3	0.489989	0.569561	1.1022
P31943	HNRNPH1	HNRNPH1	P31943	Heterogeneous nuclear ribonucleoprotein H;Heterogeneous nuclear ribonucleoprotein H, N-terminally processed	0.105773	0.898462	0.175818
P31946	YWHAB	YWHAB	P31946	14-3-3 protein beta/alpha;14-3-3 protein beta/alpha, N-terminally processed	2.35283	0.165922	-3.4192
P31948	STIP1	STIP1	P31948	Stress-induced-phosphoprotein 1	0.324222	0.691315	0.179754
P31949	S100A11	S100A11	P31949	Protein S100-A11;Protein S100-A11, N-terminally processed	2.69218	0.176	-3.03936
P32119	PRDX2	PRDX2	P32119	Peroxiredoxin-2	2.46165	0.165032	1.09462
P32321	DCTD	DCTD	P32321	Deoxycytidylate deaminase	0.790827	0.412276	-0.612594
P32322	PYCR1	PYCR1	P32322	Pyrroline-5-carboxylate reductase 1, mitochondrial	0.0661957	0.936381	0.112043
P32455	GBP1	GBP1;GBP3	P32455;Q9H0R5	Interferon-induced guanylate-binding protein 1;Guanylate-binding protein 3	0.156002	0.857466	0.252946
P32929	CTH	CTH	P32929	Cystathionine gamma-lyase	0.203582	0.816351	0.463044
P32969	RPL9	RPL9	P32969	60S ribosomal protein L9	0.165748	0.848529	-0.141554
P33121	ACSL1	ACSL1	P33121	Long-chain-fatty-acid--CoA ligase 1	2.02501	0.166754	-0.953101
P33176	KIF5B	KIF5B	P33176;O60282;Q12840	Kinesin-1 heavy chain	0.180395	0.836602	-0.0788104
P33316	DUT	DUT	P33316	Deoxyuridine 5-triphosphate nucleotidohydrolase, mitochondrial	0.564703	0.52154	0.542273
P33527	ABCC1	ABCC1	P33527	Multidrug resistance-associated protein 1	0.0695508	0.933871	-0.200891
P33897	ABCD1	ABCD1	P33897	ATP-binding cassette sub-family D member 1	0.897751	0.376906	0.697707
P33908	MAN1A1	MAN1A1	P33908	Mannosyl-oligosaccharide 1,2-alpha-mannosidase IA	0.162298	0.850544	0.442923
P33947	KDELR2	KDELR2	P33947;P24390	ER lumen protein-retaining receptor 2	0.779942	0.410808	-2.42446
P34059	GALNS	GALNS	P34059	N-acetylgalactosamine-6-sulfatase	2.088	0.17318	3.28589
P34897	SHMT2	SHMT2	P34897	Serine hydroxymethyltransferase, mitochondrial	2.92064	0.169167	-0.871127
P34932	HSPA4	HSPA4	P34932	Heat shock 70 kDa protein 4	2.08613	0.171772	-0.642389
P34949	MPI	MPI	P34949	Mannose-6-phosphate isomerase	0.767576	0.421628	0.483711
P35052	GPC1	GPC1	P35052	Glypican-1;Secreted glypican-1	0.12986	0.879916	-0.218709
P35080	PFN2	PFN2	P35080	Profilin-2	1.76123	0.187105	-1.3644
P35221	CTNNA1	CTNNA1	P35221	Catenin alpha-1	0.0385852	0.960132	0.0294412
P35222	CTNNB1	CTNNB1	P35222;P14923	Catenin beta-1	0.122534	0.886588	-0.106895
P35232	PHB	PHB	P35232	Prohibitin	0.931023	0.372293	-0.233247
P35237	SERPINB6	SERPINB6	P35237	Serpin B6	0.675697	0.463181	-0.151176
P35240	NF2	NF2	P35240	Merlin	0.364132	0.655475	-0.814382
P35241	RDX	RDX	P35241	Radixin	0.734927	0.433661	0.611876
P35244	RPA3	RPA3	P35244	Replication protein A 14 kDa subunit	0.70107	0.447349	-1.29186
P35268	RPL22	RPL22	P35268;Q6P5R6	60S ribosomal protein L22	0.793626	0.41168	-0.620207
P35269	GTF2F1	GTF2F1	P35269	General transcription factor IIF subunit 1	0.380969	0.639712	0.52602
P35270	SPR	SPR	P35270	Sepiapterin reductase	0.295601	0.721577	0.356093
P35475	IDUA	IDUA	P35475	Alpha-L-iduronidase	0.209851	0.811418	-0.42678
P35520	CBS	CBS	P35520	Cystathionine beta-synthase	0.783682	0.409391	1.05788
P35555	FBN1	FBN1	P35555	Fibrillin-1	0.240535	0.776472	0.426927
P35573	AGL	AGL	P35573	Glycogen debranching enzyme;4-alpha-glucanotransferase;Amylo-alpha-1,6-glucosidase	0.0270231	0.970256	0.0512034
P35579	MYH9	MYH9	P35579;REV__Q9UKV3;P13535;Q9Y623;P12882;P11055;Q9UKX2	Myosin-9	0.566381	0.520639	0.155675
P35580	MYH10	MYH10	P35580	Myosin-10	0.900012	0.375457	0.334579
P35606	COPB2	COPB2	P35606	Coatomer subunit beta	1.28107	0.267604	-0.778445
P35610	SOAT1	SOAT1	P35610	Sterol O-acyltransferase 1	0.540157	0.538173	-0.781863
P35611	ADD1	ADD1	P35611	Alpha-adducin	0.420822	0.61301	-0.542518
P35613	BSG	BSG	P35613	Basigin	0.810629	0.404399	2.29072
P35637	FUS	FUS	P35637	RNA-binding protein FUS	0.103906	0.90007	0.479989
P35658	NUP214	NUP214	P35658	Nuclear pore complex protein Nup214	0.710993	0.43918	0.689604
P35659	DEK	DEK	P35659	Protein DEK	0.219476	0.802974	-0.132907
P35754	GLRX	GLRX	P35754	Glutaredoxin-1	0.433207	0.605655	-0.349164
P35914	HMGCL	HMGCL	P35914;Q8TB92	Hydroxymethylglutaryl-CoA lyase, mitochondrial	0.404728	0.624465	-0.245093
P35998	PSMC2	PSMC2	P35998	26S protease regulatory subunit 7	0.474787	0.576807	0.377291
P36269	GGT5	GGT5	P36269	Gamma-glutamyltransferase 5;Gamma-glutamyltransferase 5 heavy chain;Gamma-glutamyltransferase 5 light chain	0.0253376	0.96905	-0.0626506
P36405	ARL3	ARL3	P36405	ADP-ribosylation factor-like protein 3	0.264887	0.752032	-0.202101
P36507	MAP2K2	MAP2K2	P36507	Dual specificity mitogen-activated protein kinase kinase 2	1.43924	0.247333	1.01001
P36542	ATP5C1	ATP5C1	P36542	ATP synthase subunit gamma, mitochondrial	1.05899	0.332411	-0.493226
P36543	ATP6V1E1	ATP6V1E1	P36543	V-type proton ATPase subunit E 1	0.592839	0.509224	0.472471
P36551	CPOX	CPOX	P36551	Oxygen-dependent coproporphyrinogen-III oxidase, mitochondrial	0.878505	0.38	0.342731
P36578	RPL4	RPL4	P36578	60S ribosomal protein L4	0.163183	0.849952	-0.104143
P36776	LONP1	LONP1	P36776	Lon protease homolog, mitochondrial	0.927985	0.373135	0.178947
P36871	PGM1	PGM1	P36871	Phosphoglucomutase-1	0.657633	0.472082	0.256468
P36873	PPP1CC	PPP1CC	P36873	Serine/threonine-protein phosphatase PP1-gamma catalytic subunit	0.967912	0.362099	1.48335
P36915	GNL1	GNL1	P36915	Guanine nucleotide-binding protein-like 1	0.568525	0.521268	0.850345
P36957	DLST	DLST	P36957	Dihydrolipoyllysine-residue succinyltransferase component of 2-oxoglutarate dehydrogenase complex, mitochondrial	1.24416	0.278446	-0.531218
P37108	SRP14	SRP14	P37108	Signal recognition particle 14 kDa protein	0.815688	0.399869	-0.504239
P37198	NUP62	NUP62	P37198	Nuclear pore glycoprotein p62	0.518546	0.549552	-0.78385
P37268	FDFT1	FDFT1	P37268	Squalene synthase	0.498085	0.563101	0.9595
P37802	TAGLN2	TAGLN2	P37802	Transgelin-2	0.613755	0.497579	-0.306152
P37837	TALDO1	TALDO1	P37837	Transaldolase	0.79234	0.411622	0.835441
P38117	ETFB	ETFB	P38117	Electron transfer flavoprotein subunit beta	1.49753	0.238487	1.01321
P38159	RBMX	RBMX;RBMXL1	P38159;Q96E39;O75526;Q8N7X1	RNA-binding motif protein, X chromosome;RNA-binding motif protein, X chromosome, N-terminally processed;RNA binding motif protein, X-linked-like-1	0.6404	0.482015	-0.363386
P38606	ATP6V1A	ATP6V1A	P38606	V-type proton ATPase catalytic subunit A	0.81825	0.399482	-0.348633
P38646	HSPA9	HSPA9	P38646	Stress-70 protein, mitochondrial	0.206876	0.813619	-0.108135
P38919	EIF4A3	EIF4A3	P38919	Eukaryotic initiation factor 4A-III;Eukaryotic initiation factor 4A-III, N-terminally processed	0.504716	0.558329	-1.08175
P39019	RPS19	RPS19	P39019	40S ribosomal protein S19	0.225551	0.794528	-0.203166
P39023	RPL3	RPL3	P39023;Q92901	60S ribosomal protein L3	0.382936	0.639275	-0.592371
P39210	MPV17	MPV17	P39210	Protein Mpv17	3.01744	0.1514	-2.69166
P39656	DDOST	DDOST	P39656	Dolichyl-diphosphooligosaccharide--protein glycosyltransferase 48 kDa subunit	0.74425	0.431056	-0.636225
P39687	ANP32A	ANP32A	P39687	Acidic leucine-rich nuclear phosphoprotein 32 family member A	0.121478	0.887054	-0.545699
P40121	CAPG	CAPG	P40121	Macrophage-capping protein	2.06718	0.173397	-1.60772
P40222	TXLNA	TXLNA	P40222	Alpha-taxilin	0.106598	0.897729	-0.332813
P40227	CCT6A	CCT6A	P40227;Q92526	T-complex protein 1 subunit zeta	0.372918	0.647157	-0.264025
P40261	NNMT	NNMT	P40261	Nicotinamide N-methyltransferase	0.29813	0.719082	0.19068
P40306	PSMB10	PSMB10	P40306	Proteasome subunit beta type-10	0.0771019	0.926429	-0.160869
P40429	RPL13A	RPL13A	P40429;Q6NVV1	60S ribosomal protein L13a	0.0902696	0.916535	0.26607
P40616	ARL1	ARL1	P40616	ADP-ribosylation factor-like protein 1	0.906547	0.374252	-2.9633
P40763	STAT3	STAT3	P40763	Signal transducer and activator of transcription 3	1.14236	0.304325	-0.591416
P40818	USP8	USP8	P40818	Ubiquitin carboxyl-terminal hydrolase 8	0.434296	0.606828	-0.749836
P40925	MDH1	MDH1	P40925	Malate dehydrogenase, cytoplasmic	0.916942	0.373852	-0.345506
P40926	MDH2	MDH2	P40926	Malate dehydrogenase, mitochondrial	0.42417	0.61134	0.331748
P40938	RFC3	RFC3	P40938	Replication factor C subunit 3	2.5976	0.156596	1.29481
P40939	HADHA	HADHA	P40939	Trifunctional enzyme subunit alpha, mitochondrial;Long-chain enoyl-CoA hydratase;Long chain 3-hydroxyacyl-CoA dehydrogenase	1.71746	0.191378	0.396174
P41091	EIF2S3	EIF2S3;EIF2S3L	P41091;Q2VIR3	Eukaryotic translation initiation factor 2 subunit 3;Putative eukaryotic translation initiation factor 2 subunit 3-like protein	0.469056	0.580448	0.156697
P41226	UBA7	UBA7	P41226	Ubiquitin-like modifier-activating enzyme 7	0.786837	0.411173	-0.834832
P41240	CSK	CSK	P41240;P42679	Tyrosine-protein kinase CSK	0.677539	0.461966	1.32093
P41250	GARS	GARS	P41250	Glycine--tRNA ligase	0.746135	0.431323	-0.202133
P41252	IARS	IARS	P41252	Isoleucine--tRNA ligase, cytoplasmic	1.08818	0.328532	-0.280924
P41567	EIF1	EIF1	P41567	Eukaryotic translation initiation factor 1	0.0627289	0.9384	-0.330917
P42025	ACTR1B	ACTR1B	P42025	Beta-centractin	0.578734	0.517086	-1.39962
P42126	ECI1	ECI1	P42126	Enoyl-CoA delta isomerase 1, mitochondrial	0.292484	0.724572	-0.188365
P42167	TMPO	TMPO	P42167;P42166	Lamina-associated polypeptide 2, isoforms beta/gamma;Thymopoietin;Thymopentin;Lamina-associated polypeptide 2, isoform alpha;Thymopoietin;Thymopentin	0.711624	0.439578	0.56044
P42224	STAT1	STAT1	P42224	Signal transducer and activator of transcription 1-alpha/beta	0.122231	0.886661	-0.131676
P42226	STAT6	STAT6	P42226	Signal transducer and activator of transcription 6	0.29649	0.721865	0.811514
P42229	STAT5A	STAT5A	P42229	Signal transducer and activator of transcription 5A	0.893449	0.377547	1.73174
P42285	SKIV2L2	SKIV2L2	P42285	Superkiller viralicidic activity 2-like 2	0.690627	0.455041	0.303761
P42330	AKR1C3	AKR1C3	P42330	Aldo-keto reductase family 1 member C3	2.05055	0.170576	-0.723101
P42336	PIK3CA	PIK3CA	P42336	Phosphatidylinositol 4,5-bisphosphate 3-kinase catalytic subunit alpha isoform	0.822169	0.397874	1.02565
P42345	MTOR	MTOR	P42345	Serine/threonine-protein kinase mTOR	0.400164	0.627126	0.482409
P42356	PI4KA	PI4KA	P42356;A4QPH2	Phosphatidylinositol 4-kinase alpha	0.554799	0.527982	0.722866
P42566	EPS15	EPS15	P42566	Epidermal growth factor receptor substrate 15	0.00911644	0.987999	0.0234013
P42574	CASP3	CASP3	P42574	Caspase-3;Caspase-3 subunit p17;Caspase-3 subunit p12	0.764032	0.424495	-1.0165
P42696	RBM34	RBM34	P42696	RNA-binding protein 34	0.671155	0.462209	1.91762
P42704	LRPPRC	LRPPRC	P42704	Leucine-rich PPR motif-containing protein, mitochondrial	0.726563	0.436338	0.622119
P42765	ACAA2	ACAA2	P42765	3-ketoacyl-CoA thiolase, mitochondrial	0.295305	0.721748	-0.154536
P42785	PRCP	PRCP	P42785	Lysosomal Pro-X carboxypeptidase	0.499616	0.561475	-2.60648
P42858	HTT	HTT	P42858	Huntingtin	0.148731	0.861499	0.353605
P42892	ECE1	ECE1	P42892	Endothelin-converting enzyme 1	0.153542	0.858164	-0.228527
P43034	PAFAH1B1	PAFAH1B1	P43034	Platelet-activating factor acetylhydrolase IB subunit alpha	0.105914	0.898766	-0.157618
P43155	CRAT	CRAT	P43155	Carnitine O-acetyltransferase	0.699712	0.447738	0.464562
P43243	MATR3	MATR3	P43243	Matrin-3	0.141806	0.870156	0.06902
P43246	MSH2	MSH2	P43246	DNA mismatch repair protein Msh2	0.0174424	0.976907	-0.0404706
P43304	GPD2	GPD2	P43304	Glycerol-3-phosphate dehydrogenase, mitochondrial	0.0339594	0.964212	0.0279903
P43307	SSR1	SSR1	P43307	Translocon-associated protein subunit alpha	0.18173	0.834522	0.309824
P43487	RANBP1	RANBP1	P43487	Ran-specific GTPase-activating protein	0.112056	0.896735	-0.168645
P43490	NAMPT	NAMPT	P43490	Nicotinamide phosphoribosyltransferase	0.83218	0.392339	-0.335929
P43686	PSMC4	PSMC4	P43686	26S protease regulatory subunit 6B	0.525622	0.548025	0.0880324
P45877	PPIC	PPIC	P45877	Peptidyl-prolyl cis-trans isomerase C	0.187223	0.831713	0.338545
P45880	VDAC2	VDAC2	P45880	Voltage-dependent anion-selective channel protein 2	1.79385	0.187816	-0.978368
P45954	ACADSB	ACADSB	P45954	Short/branched chain specific acyl-CoA dehydrogenase, mitochondrial	0.0241785	0.970004	-0.0130647
P45974	USP5	USP5	P45974	Ubiquitin carboxyl-terminal hydrolase 5	0.302549	0.715072	0.197601
P45985	MAP2K4	MAP2K4	P45985	Dual specificity mitogen-activated protein kinase kinase 4	0.726318	0.436114	-0.973909
P46060	RANGAP1	RANGAP1	P46060	Ran GTPase-activating protein 1	0.171897	0.843613	0.124269
P46063	RECQL	RECQL	P46063	ATP-dependent DNA helicase Q1	1.58758	0.220106	-1.01444
P46087	NOP2	NOP2	P46087	Probable 28S rRNA (cytosine(4447)-C(5))-methyltransferase	0.00754364	0.989449	0.00429789
P46108	CRK	CRK	P46108	Adapter molecule crk	1.27865	0.267615	0.323915
P46109	CRKL	CRKL	P46109	Crk-like protein	0.191312	0.829067	0.557582
P46379	BAG6	BAG6	P46379	Large proline-rich protein BAG6	0.444742	0.598551	0.338814
P46459	NSF	NSF	P46459	Vesicle-fusing ATPase	1.1006	0.323585	-0.537381
P46734	MAP2K3	MAP2K3	P46734	Dual specificity mitogen-activated protein kinase kinase 3	2.77628	0.158424	-1.5089
P46776	RPL27A	RPL27A	P46776	60S ribosomal protein L27a	0.777929	0.412203	0.424208
P46777	RPL5	RPL5	P46777	60S ribosomal protein L5	0.806978	0.405804	-0.772467
P46778	RPL21	RPL21	P46778	60S ribosomal protein L21	2.66317	0.1659	3.34879
P46779	RPL28	RPL28	P46779	60S ribosomal protein L28	0.0154324	0.981133	0.0614141
P46781	RPS9	RPS9	P46781	40S ribosomal protein S9	0.888905	0.37857	0.410496
P46782	RPS5	RPS5	P46782	40S ribosomal protein S5;40S ribosomal protein S5, N-terminally processed	0.531573	0.543154	0.563153
P46783	RPS10	RPS10	P46783;Q9NQ39	40S ribosomal protein S10	1.36246	0.261256	-0.813575
P46821	MAP1B	MAP1B	P46821	Microtubule-associated protein 1B;MAP1B heavy chain;MAP1 light chain LC1	1.92451	0.17505	-0.378432
P46926	GNPDA1	GNPDA1	P46926	Glucosamine-6-phosphate isomerase 1	0.465474	0.582367	-0.412799
P46934	NEDD4	NEDD4	P46934	E3 ubiquitin-protein ligase NEDD4	0.603006	0.5037	0.524225
P46939	UTRN	UTRN	P46939;P11532	Utrophin	0.351338	0.670534	0.528049
P46940	IQGAP1	IQGAP1	P46940;Q86VI3	Ras GTPase-activating-like protein IQGAP1	2.05726	0.172187	-0.225708
P46976	GYG1	GYG1	P46976	Glycogenin-1	0.212942	0.809001	-0.450754
P46977	STT3A	STT3A	P46977	Dolichyl-diphosphooligosaccharide--protein glycosyltransferase subunit STT3A	1.14663	0.304164	-2.25062
P47712	PLA2G4A	PLA2G4A	P47712	Cytosolic phospholipase A2;Phospholipase A2;Lysophospholipase	1.1699	0.30254	-1.66469
P47755	CAPZA2	CAPZA2	P47755	F-actin-capping protein subunit alpha-2	2.92621	0.176522	-0.598921
P47756	CAPZB	CAPZB	P47756	F-actin-capping protein subunit beta	2.79515	0.15975	-1.37793
P47897	QARS	QARS	P47897	Glutamine--tRNA ligase	0.950973	0.36282	-0.391455
P47985	UQCRFS1	UQCRFS1;UQCRFS1P1	P47985;P0C7P4	Cytochrome b-c1 complex subunit Rieske, mitochondrial;Cytochrome b-c1 complex subunit 11;Putative cytochrome b-c1 complex subunit Rieske-like protein 1	0.837427	0.388848	1.33309
P48047	ATP5O	ATP5O	P48047	ATP synthase subunit O, mitochondrial	0.485723	0.57004	0.340534
P48059	LIMS1	LIMS1	P48059	LIM and senescent cell antigen-like-containing domain protein 1	0.784888	0.409678	-0.463179
P48147	PREP	PREP	P48147	Prolyl endopeptidase	0.532632	0.54269	0.484901
P48163	ME1	ME1	P48163	NADP-dependent malic enzyme	0.965877	0.362898	-2.2713
P48200	IREB2	IREB2	P48200	Iron-responsive element-binding protein 2	0.938111	0.369604	1.85231
P48426	PIP4K2A	PIP4K2A	P48426	Phosphatidylinositol 5-phosphate 4-kinase type-2 alpha	0.546569	0.535146	-1.26852
P48444	ARCN1	ARCN1	P48444	Coatomer subunit delta	1.24643	0.278398	0.617264
P48449	LSS	LSS	P48449	Lanosterol synthase	0.759771	0.426874	0.748126
P48506	GCLC	GCLC	P48506	Glutamate--cysteine ligase catalytic subunit	0.0714135	0.933016	-0.0870641
P48507	GCLM	GCLM	P48507	Glutamate--cysteine ligase regulatory subunit	0.210219	0.811553	0.192764
P48556	PSMD8	PSMD8	P48556	26S proteasome non-ATPase regulatory subunit 8	0.487653	0.568893	-0.680692
P48634	PRRC2A	PRRC2A	P48634	Protein PRRC2A	0.644785	0.47799	1.22717
P48637	GSS	GSS	P48637	Glutathione synthetase	0.512566	0.555206	-0.392361
P48643	CCT5	CCT5	P48643	T-complex protein 1 subunit epsilon	0.927369	0.372211	-0.212977
P48651	PTDSS1	PTDSS1	P48651	Phosphatidylserine synthase 1	0.168778	0.844342	-0.175758
P48723	HSPA13	HSPA13	P48723	Heat shock 70 kDa protein 13	1.5852	0.219194	0.851018
P48735	IDH2	IDH2	P48735	Isocitrate dehydrogenase [NADP], mitochondrial	0.185878	0.83377	-0.161125
P48739	PITPNB	PITPNB	P48739	Phosphatidylinositol transfer protein beta isoform	1.87247	0.180184	-0.676971
P49023	PXN	PXN	P49023	Paxillin	0.479649	0.573437	-1.42717
P49137	MAPKAPK2	MAPKAPK2;TSSK3;PRKY;PRKX;MAPKAPK3	P49137;Q96PN8;O43930;P51817;Q16644	MAP kinase-activated protein kinase 2;Testis-specific serine/threonine-protein kinase 3;Putative serine/threonine-protein kinase PRKY;cAMP-dependent protein kinase catalytic subunit PRKX;MAP kinase-activated protein kinase 3	1.02991	0.344548	1.30865
P49189	ALDH9A1	ALDH9A1	P49189	4-trimethylaminobutyraldehyde dehydrogenase	1.3689	0.259128	-0.583843
P49207	RPL34	RPL34	P49207	60S ribosomal protein L34	0.520671	0.549312	1.08765
P49257	LMAN1	LMAN1	P49257	Protein ERGIC-53	2.16426	0.172932	-0.712063
P49327	FASN	FASN	P49327	Fatty acid synthase;[Acyl-carrier-protein] S-acetyltransferase;[Acyl-carrier-protein] S-malonyltransferase;3-oxoacyl-[acyl-carrier-protein] synthase;3-oxoacyl-[acyl-carrier-protein] reductase;3-hydroxyacyl-[acyl-carrier-protein] dehydratase;Enoyl-[acyl-carrier-protein] reductase;Oleoyl-[acyl-carrier-protein] hydrolase	0.826246	0.3941	0.295811
P49354	FNTA	FNTA	P49354	Protein farnesyltransferase/geranylgeranyltransferase type-1 subunit alpha	0.316991	0.699024	0.26112
P49356	FNTB	FNTB	P49356	Protein farnesyltransferase subunit beta	0.7889	0.41073	-1.31175
P49368	CCT3	CCT3	P49368	T-complex protein 1 subunit gamma	0.56829	0.521156	-0.163807
P49406	MRPL19	MRPL19	P49406	39S ribosomal protein L19, mitochondrial	0.672721	0.46346	-0.462608
P49411	TUFM	TUFM	P49411	Elongation factor Tu, mitochondrial	0.393808	0.63224	0.154865
P49419	ALDH7A1	ALDH7A1	P49419	Alpha-aminoadipic semialdehyde dehydrogenase	1.40596	0.255269	-0.656658
P49441	INPP1	INPP1	P49441	Inositol polyphosphate 1-phosphatase	0.542482	0.538003	0.594774
P49458	SRP9	SRP9	P49458	Signal recognition particle 9 kDa protein	0.257404	0.75976	-0.968283
P49585	PCYT1A	PCYT1A	P49585;Q9Y5K3	Choline-phosphate cytidylyltransferase A	0.451481	0.593925	-2.00673
P49588	AARS	AARS	P49588	Alanine--tRNA ligase, cytoplasmic	0.469846	0.579747	-0.395083
P49589	CARS	CARS	P49589	Cysteine--tRNA ligase, cytoplasmic	0.606897	0.502407	0.468321
P49591	SARS	SARS	P49591	Serine--tRNA ligase, cytoplasmic	0.589273	0.512587	-0.221212
P49593	PPM1F	PPM1F	P49593	Protein phosphatase 1F	0.0354431	0.96382	-0.0720539
P49720	PSMB3	PSMB3	P49720	Proteasome subunit beta type-3	1.0146	0.345218	-1.15465
P49721	PSMB2	PSMB2	P49721	Proteasome subunit beta type-2	3.91654	0.12	0.864287
P49748	ACADVL	ACADVL	P49748	Very long-chain specific acyl-CoA dehydrogenase, mitochondrial	0.579859	0.517049	0.319494
P49753	ACOT2	ACOT2;ACOT1	P49753;Q86TX2	Acyl-coenzyme A thioesterase 2, mitochondrial;Acyl-coenzyme A thioesterase 1	0.104283	0.900067	-0.0806611
P49754	VPS41	VPS41	P49754	Vacuolar protein sorting-associated protein 41 homolog	0.339919	0.678116	0.54472
P49755	TMED10	TMED10	P49755	Transmembrane emp24 domain-containing protein 10	0.0875087	0.918714	-0.14889
P49756	RBM25	RBM25	P49756	RNA-binding protein 25	0.00136487	0.997614	0.00353305
P49770	EIF2B2	EIF2B2	P49770	Translation initiation factor eIF-2B subunit beta	1.47908	0.237258	-2.31698
P49773	HINT1	HINT1	P49773	Histidine triad nucleotide-binding protein 1	0.0686004	0.934488	-0.136143
P49790	NUP153	NUP153	P49790	Nuclear pore complex protein Nup153	1.18083	0.297739	1.37966
P49792	RANBP2	RANBP2	P49792	E3 SUMO-protein ligase RanBP2	0.230816	0.787255	-0.0916506
P49821	NDUFV1	NDUFV1	P49821	NADH dehydrogenase [ubiquinone] flavoprotein 1, mitochondrial	0.804198	0.409001	1.8647
P49840	GSK3A	GSK3A	P49840	Glycogen synthase kinase-3 alpha	0.806982	0.406241	1.10146
P49841	GSK3B	GSK3B	P49841	Glycogen synthase kinase-3 beta	1.27548	0.2676	1.40476
P49902	NT5C2	NT5C2	P49902	Cytosolic purine 5-nucleotidase	0.407116	0.624518	-0.31241
P49903	SEPHS1	SEPHS1	P49903	Selenide, water dikinase 1	0.425262	0.610017	-0.316557
P49915	GMPS	GMPS	P49915	GMP synthase [glutamine-hydrolyzing]	0.836495	0.388756	0.387622
P49916	LIG3	LIG3	P49916	DNA ligase 3	0.190471	0.830271	0.252522
P49959	MRE11A	MRE11A	P49959	Double-strand break repair protein MRE11A	0.968914	0.361284	-1.01804
P50148	GNAQ	GNAQ	P50148	Guanine nucleotide-binding protein G(q) subunit alpha	0.19188	0.8285	0.175963
P50213	IDH3A	IDH3A	P50213	Isocitrate dehydrogenase [NAD] subunit alpha, mitochondrial	1.48982	0.2369	-1.17316
P50336	PPOX	PPOX	P50336	Protoporphyrinogen oxidase	0.0516445	0.950064	0.0998425
P50395	GDI2	GDI2	P50395	Rab GDP dissociation inhibitor beta	1.48363	0.236304	-0.34532
P50402	EMD	EMD	P50402	Emerin	0.082358	0.922153	-0.107756
P50416	CPT1A	CPT1A	P50416	Carnitine O-palmitoyltransferase 1, liver isoform	1.18106	0.297671	-0.240451
P50452	SERPINB8	SERPINB8	P50452;P50453	Serpin B8	0.226242	0.794206	-0.41056
P50454	SERPINH1	SERPINH1	P50454	Serpin H1	1.04593	0.337288	0.911864
P50479	PDLIM4	PDLIM4	P50479	PDZ and LIM domain protein 4	1.5472	0.223046	-1.27113
P50502	ST13	ST13;ST13P4;ST13P5	P50502;Q8IZP2;Q8NFI4	Hsc70-interacting protein;Putative protein FAM10A4;Putative protein FAM10A5	0.262196	0.754702	-0.223475
P50552	VASP	VASP	P50552	Vasodilator-stimulated phosphoprotein	0.426201	0.610165	-0.672593
P50570	DNM2	DNM2	P50570;Q05193;Q9UQ16	Dynamin-2	1.26827	0.271876	0.701259
P50579	METAP2	METAP2	P50579	Methionine aminopeptidase 2	0.678493	0.461023	0.598366
P50583	NUDT2	NUDT2	P50583	Bis(5-nucleosyl)-tetraphosphatase [asymmetrical]	0.195391	0.82504	0.336238
P50897	PPT1	PPT1	P50897	Palmitoyl-protein thioesterase 1	0.136949	0.873733	-0.381035
P50914	RPL14	RPL14	P50914	60S ribosomal protein L14	0.822229	0.398313	-0.80486
P50990	CCT8	CCT8	P50990	T-complex protein 1 subunit theta	0.0602122	0.940711	0.052707
P50991	CCT4	CCT4	P50991	T-complex protein 1 subunit delta	0.519612	0.549068	-0.301183
P50993	ATP1A2	ATP1A2	P50993	Sodium/potassium-transporting ATPase subunit alpha-2	1.16588	0.303006	1.95601
P50995	ANXA11	ANXA11	P50995	Annexin A11	1.21352	0.284516	0.876766
P51003	PAPOLA	PAPOLA;PAPOLB	P51003;Q9NRJ5	Poly(A) polymerase alpha;Poly(A) polymerase beta	1.40591	0.254541	1.08046
P51114	FXR1	FXR1	P51114	Fragile X mental retardation syndrome-related protein 1	0.0686741	0.934761	-0.154857
P51116	FXR2	FXR2	P51116	Fragile X mental retardation syndrome-related protein 2	0.0910915	0.915216	-0.201614
P51148	RAB5C	RAB5C	P51148	Ras-related protein Rab-5C	2.2998	0.156598	-0.679471
P51149	RAB7A	RAB7A	P51149	Ras-related protein Rab-7a	1.71977	0.192466	-0.637288
P51151	RAB9A	RAB9A	P51151	Ras-related protein Rab-9A	0.260192	0.757108	-0.315036
P51178	PLCD1	PLCD1	P51178	1-phosphatidylinositol 4,5-bisphosphate phosphodiesterase delta-1	0.519556	0.548757	-0.207726
P51398	DAP3	DAP3	P51398	28S ribosomal protein S29, mitochondrial	0.550108	0.532161	1.24834
P51452	DUSP3	DUSP3	P51452	Dual specificity protein phosphatase 3	0.0257639	0.969551	0.0843141
P51531	SMARCA2	SMARCA2	P51531	Probable global transcription activator SNF2L2	0.0393696	0.959896	0.0219936
P51532	SMARCA4	SMARCA4	P51532	Transcription activator BRG1	0.184478	0.833781	0.229461
P51553	IDH3G	IDH3G	P51553	Isocitrate dehydrogenase [NAD] subunit gamma, mitochondrial	0.839998	0.38965	-0.417225
P51570	GALK1	GALK1	P51570	Galactokinase	0.484031	0.569137	-0.792989
P51571	SSR4	SSR4	P51571	Translocon-associated protein subunit delta	1.07358	0.330501	-0.515064
P51608	MECP2	MECP2	P51608	Methyl-CpG-binding protein 2	0.633734	0.487458	0.788032
P51610	HCFC1	HCFC1	P51610	Host cell factor 1;HCF N-terminal chain 1;HCF N-terminal chain 2;HCF N-terminal chain 3;HCF N-terminal chain 4;HCF N-terminal chain 5;HCF N-terminal chain 6;HCF C-terminal chain 1;HCF C-terminal chain 2;HCF C-terminal chain 3;HCF C-terminal chain 4;HCF C-terminal chain 5;HCF C-terminal chain 6	1.07386	0.330532	0.948244
P51636	CAV2	CAV2	P51636	Caveolin-2	0.391192	0.633252	-0.654502
P51648	ALDH3A2	ALDH3A2	P51648;P48448;P30838;P43353	Fatty aldehyde dehydrogenase	0.609655	0.500042	0.263279
P51649	ALDH5A1	ALDH5A1	P51649	Succinate-semialdehyde dehydrogenase, mitochondrial	2.45158	0.165813	2.01555
P51659	HSD17B4	HSD17B4	P51659	Peroxisomal multifunctional enzyme type 2;(3R)-hydroxyacyl-CoA dehydrogenase;Enoyl-CoA hydratase 2	0.405745	0.624842	0.0804488
P51665	PSMD7	PSMD7	P51665	26S proteasome non-ATPase regulatory subunit 7	1.37792	0.255689	-0.3084
P51688	SGSH	SGSH	P51688	N-sulphoglucosamine sulphohydrolase	0.0338934	0.963687	0.0171432
P51692	STAT5B	STAT5B	P51692	Signal transducer and activator of transcription 5B	1.11504	0.317101	1.54618
P51809	VAMP7	VAMP7	P51809	Vesicle-associated membrane protein 7	0.811522	0.402997	-1.05863
P51857	AKR1D1	AKR1D1	P51857	3-oxo-5-beta-steroid 4-dehydrogenase	2.14603	0.177057	5.08338
P51858	HDGF	HDGF	P51858	Hepatoma-derived growth factor	0.267727	0.748597	0.448005
P51911	CNN1	CNN1	P51911	Calponin-1	0.637998	0.482746	0.386214
P51970	NDUFA8	NDUFA8	P51970	NADH dehydrogenase [ubiquinone] 1 alpha subcomplex subunit 8	0.208622	0.812152	0.526168
P51991	HNRNPA3	HNRNPA3	P51991	Heterogeneous nuclear ribonucleoprotein A3	0.809533	0.404809	-2.05192
P52209	PGD	PGD	P52209	6-phosphogluconate dehydrogenase, decarboxylating	0.532571	0.542391	-0.403084
P52272	HNRNPM	HNRNPM	P52272	Heterogeneous nuclear ribonucleoprotein M	1.45187	0.244566	-0.875602
P52292	KPNA2	KPNA2	P52292	Importin subunit alpha-1	1.28425	0.26751	2.31883
P52294	KPNA1	KPNA1	P52294	Importin subunit alpha-5;Importin subunit alpha-5, N-terminally processed	1.61266	0.220614	-3.14338
P52306	RAP1GDS1	RAP1GDS1	P52306	Rap1 GTPase-GDP dissociation stimulator 1	1.56295	0.222391	-0.928329
P52434	POLR2H	POLR2H	P52434	DNA-directed RNA polymerases I, II, and III subunit RPABC3	0.672474	0.462678	-1.5691
P52565	ARHGDIA	ARHGDIA	P52565	Rho GDP-dissociation inhibitor 1	0.201231	0.818247	-0.34162
P52594	AGFG1	AGFG1	P52594	Arf-GAP domain and FG repeat-containing protein 1	0.111954	0.896541	0.174315
P52597	HNRNPF	HNRNPF	P52597	Heterogeneous nuclear ribonucleoprotein F;Heterogeneous nuclear ribonucleoprotein F, N-terminally processed	0.932152	0.37176	-1.15537
P52630	STAT2	STAT2	P52630	Signal transducer and activator of transcription 2	0.150024	0.859571	0.249099
P52735	VAV2	VAV2	P52735	Guanine nucleotide exchange factor VAV2	0.997957	0.353186	-1.98331
P52788	SMS	SMS	P52788	Spermine synthase	1.05146	0.335018	-1.31946
P52789	HK2	HK2	P52789;P52790	Hexokinase-2	0.193581	0.825249	-0.315423
P52815	MRPL12	MRPL12	P52815	39S ribosomal protein L12, mitochondrial	3.30849	0.154	-2.79713
P52848	NDST1	NDST1	P52848	Bifunctional heparan sulfate N-deacetylase/N-sulfotransferase 1;Heparan sulfate N-deacetylase 1;Heparan sulfate N-sulfotransferase 1	0.553391	0.529126	2.25352
P52888	THOP1	THOP1	P52888	Thimet oligopeptidase	0.0240516	0.969941	0.0323715
P52895	AKR1C2	AKR1C2	P52895	Aldo-keto reductase family 1 member C2	0.239269	0.777619	0.564952
P52907	CAPZA1	CAPZA1	P52907	F-actin-capping protein subunit alpha-1	0.386407	0.635224	0.267026
P52943	CRIP2	CRIP2	P52943	Cysteine-rich protein 2	0.997904	0.352661	-0.525932
P52948	NUP98	NUP98	P52948	Nuclear pore complex protein Nup98-Nup96;Nuclear pore complex protein Nup98;Nuclear pore complex protein Nup96	0.162153	0.850614	-0.193289
P53004	BLVRA	BLVRA	P53004	Biliverdin reductase A	0.594786	0.508319	-0.556415
P53007	SLC25A1	SLC25A1	P53007	Tricarboxylate transport protein, mitochondrial	0.847133	0.389796	0.856624
P53041	PPP5C	PPP5C	P53041	Serine/threonine-protein phosphatase 5	0.0208864	0.973952	-0.0392609
P53367	ARFIP1	ARFIP1	P53367	Arfaptin-1	0.05251	0.950711	-0.117349
P53396	ACLY	ACLY	P53396	ATP-citrate synthase	0.13384	0.87582	0.0912062
P53582	METAP1	METAP1	P53582	Methionine aminopeptidase 1	0.700317	0.446919	-0.490276
P53597	SUCLG1	SUCLG1	P53597	Succinyl-CoA ligase [ADP/GDP-forming] subunit alpha, mitochondrial	2.66749	0.174632	-1.59942
P53602	MVD	MVD	P53602	Diphosphomevalonate decarboxylase	1.28188	0.268471	2.3328
P53618	COPB1	COPB1	P53618	Coatomer subunit beta	0.0606332	0.940713	0.0279338
P53621	COPA	COPA	P53621	Coatomer subunit alpha;Xenin;Proxenin	0.0480449	0.95389	0.0260302
P53801	PTTG1IP	PTTG1IP	P53801	Pituitary tumor-transforming gene 1 protein-interacting protein	0.733093	0.433143	0.791984
P53990	IST1	IST1	P53990	IST1 homolog	0.56353	0.522748	0.473851
P53992	SEC24C	SEC24C	P53992	Protein transport protein Sec24C	1.38027	0.256259	0.440166
P53999	SUB1	SUB1	P53999	Activated RNA polymerase II transcriptional coactivator p15	1.31884	0.264097	1.24477
P54136	RARS	RARS	P54136	Arginine--tRNA ligase, cytoplasmic	1.16897	0.302101	-0.245276
P54289	CACNA2D1	CACNA2D1	P54289	Voltage-dependent calcium channel subunit alpha-2/delta-1;Voltage-dependent calcium channel subunit alpha-2-1;Voltage-dependent calcium channel subunit delta-1	1.63623	0.216569	-2.26755
P54577	YARS	YARS	P54577	Tyrosine--tRNA ligase, cytoplasmic;Tyrosine--tRNA ligase, cytoplasmic, N-terminally processed	0.44267	0.59877	0.177382
P54578	USP14	USP14	P54578	Ubiquitin carboxyl-terminal hydrolase 14	0.106796	0.898769	0.114084
P54619	PRKAG1	PRKAG1	P54619;Q9UGJ0	5-AMP-activated protein kinase subunit gamma-1	0.577238	0.51758	-1.92125
P54687	BCAT1	BCAT1	P54687	Branched-chain-amino-acid aminotransferase, cytosolic	0.477684	0.575192	-0.452923
P54709	ATP1B3	ATP1B3	P54709	Sodium/potassium-transporting ATPase subunit beta-3	0.18194	0.834683	-0.312702
P54725	RAD23A	RAD23A	P54725	UV excision repair protein RAD23 homolog A	0.0984724	0.905252	-0.231096
P54727	RAD23B	RAD23B	P54727	UV excision repair protein RAD23 homolog B	0.947733	0.36245	0.616807
P54802	NAGLU	NAGLU	P54802	Alpha-N-acetylglucosaminidase;Alpha-N-acetylglucosaminidase 82 kDa form;Alpha-N-acetylglucosaminidase 77 kDa form	0.412024	0.620984	-0.429254
P54819	AK2	AK2	P54819	Adenylate kinase 2, mitochondrial;Adenylate kinase 2, mitochondrial, N-terminally processed	0.342639	0.67657	-0.275531
P54886	ALDH18A1	ALDH18A1	P54886	Delta-1-pyrroline-5-carboxylate synthase;Glutamate 5-kinase;Gamma-glutamyl phosphate reductase	0.611385	0.499592	0.303225
P54920	NAPA	NAPA	P54920;Q9H115	Alpha-soluble NSF attachment protein	0.49766	0.561943	-0.287994
P55010	EIF5	EIF5	P55010	Eukaryotic translation initiation factor 5	0.611056	0.499679	-0.218508
P55036	PSMD4	PSMD4	P55036;A2A3N6	26S proteasome non-ATPase regulatory subunit 4	0.452797	0.593446	0.38268
P55039	DRG2	DRG2	P55039	Developmentally-regulated GTP-binding protein 2	1.23095	0.27863	1.06895
P55060	CSE1L	CSE1L	P55060	Exportin-2	0.905404	0.374431	-1.26012
P55061	TMBIM6	TMBIM6	P55061	Bax inhibitor 1	0.0683576	0.934351	-0.0711522
P55072	VCP	VCP	P55072	Transitional endoplasmic reticulum ATPase	0.521643	0.550304	0.252013
P55084	HADHB	HADHB	P55084	Trifunctional enzyme subunit beta, mitochondrial;3-ketoacyl-CoA thiolase	0.819461	0.39974	-0.485839
P55209	NAP1L1	NAP1L1	P55209	Nucleosome assembly protein 1-like 1	0.312643	0.703222	0.244747
P55263	ADK	ADK	P55263	Adenosine kinase	0.700197	0.447201	-0.488433
P55265	ADAR	ADAR	P55265	Double-stranded RNA-specific adenosine deaminase	1.49528	0.235392	-0.393717
P55268	LAMB2	LAMB2	P55268	Laminin subunit beta-2	0.113541	0.895969	-0.32708
P55287	CDH11	CDH11	P55287	Cadherin-11	0.135771	0.874446	0.427624
P55290	CDH13	CDH13	P55290	Cadherin-13	0.0570146	0.944619	0.0762965
P55735	SEC13	SEC13	P55735	Protein SEC13 homolog	0.857541	0.388145	-0.239328
P55786	NPEPPS	NPEPPS	P55786;A6NEC2	Puromycin-sensitive aminopeptidase	1.06717	0.330768	-0.414731
P55795	HNRNPH2	HNRNPH2	P55795	Heterogeneous nuclear ribonucleoprotein H2	0.789207	0.411157	-0.812618
P55809	OXCT1	OXCT1	P55809	Succinyl-CoA:3-ketoacid coenzyme A transferase 1, mitochondrial	0.39062	0.632835	-0.338666
P55884	EIF3B	EIF3B	P55884	Eukaryotic translation initiation factor 3 subunit B	1.10626	0.319745	-0.426456
P56134	ATP5J2	ATP5J2	P56134	ATP synthase subunit f, mitochondrial	0.0268508	0.969601	0.0618814
P56182	RRP1	RRP1	P56182	Ribosomal RNA processing protein 1 homolog A	0.102473	0.900534	0.361218
P56192	MARS	MARS	P56192	Methionine--tRNA ligase, cytoplasmic	0.0874593	0.918643	-0.040446
P56199	ITGA1	ITGA1	P56199	Integrin alpha-1	0.128303	0.880168	0.244687
P56537	EIF6	EIF6	P56537	Eukaryotic translation initiation factor 6	0.195822	0.824688	0.189427
P56945	BCAR1	BCAR1	P56945	Breast cancer anti-estrogen resistance protein 1	0.3186	0.698197	0.390207
P57088	TMEM33	TMEM33	P57088	Transmembrane protein 33	0.134591	0.874716	0.088164
P57737	CORO7	CORO7	P57737	Coronin-7	0.74177	0.431626	1.43419
P57740	NUP107	NUP107	P57740	Nuclear pore complex protein Nup107	0.375577	0.647254	-0.686291
P57772	EEFSEC	EEFSEC	P57772	Selenocysteine-specific elongation factor	1.06155	0.331279	-1.48911
P58107	EPPK1	EPPK1	P58107	Epiplakin	0.0970744	0.906135	-0.56577
P58546	MTPN	MTPN	P58546	Myotrophin	0.966757	0.362693	-2.04956
P59998	ARPC4	ARPC4	P59998	Actin-related protein 2/3 complex subunit 4	0.434234	0.606593	-0.161202
P60033	CD81	CD81	P60033	CD81 antigen	0.653618	0.471939	-0.658562
P60174	TPI1	TPI1	P60174	Triosephosphate isomerase	0.529636	0.544567	0.373857
P60228	EIF3E	EIF3E	P60228	Eukaryotic translation initiation factor 3 subunit E	0.698394	0.448291	-1.04216
P60510	PPP4C	PPP4C	P60510	Serine/threonine-protein phosphatase 4 catalytic subunit	0.398057	0.627669	1.08945
P60660	MYL6	MYL6	P60660;P14649	Myosin light polypeptide 6	0.940265	0.367919	-0.871476
P60842	EIF4A1	EIF4A1	P60842	Eukaryotic initiation factor 4A-I	1.62351	0.218352	-0.800917
P60866	RPS20	RPS20	P60866	40S ribosomal protein S20	3.35566	0.136727	4.56194
P60891	PRPS1	PRPS1;PRPS1L1;PRPS2	P60891;P21108;P11908	Ribose-phosphate pyrophosphokinase 1;Ribose-phosphate pyrophosphokinase 3;Ribose-phosphate pyrophosphokinase 2	0.0724073	0.932062	0.0273361
P60900	PSMA6	PSMA6	P60900	Proteasome subunit alpha type-6	0.00370883	0.996233	0.00326602
P60903	S100A10	S100A10	P60903	Protein S100-A10	1.78851	0.183721	-0.650283
P60953	CDC42	CDC42	P60953	Cell division control protein 42 homolog	0.898084	0.377093	1.53745
P60981	DSTN	DSTN	P60981	Destrin	1.02286	0.345699	-0.974096
P60983	GMFB	GMFB	P60983	Glia maturation factor beta	0.200499	0.817917	-0.425793
P61006	RAB8A	RAB8A	P61006	Ras-related protein Rab-8A	0.196735	0.823419	0.121498
P61009	SPCS3	SPCS3	P61009	Signal peptidase complex subunit 3	0.0235054	0.97	0.0521456
P61011	SRP54	SRP54	P61011	Signal recognition particle 54 kDa protein	0.807874	0.405748	-0.532644
P61018	RAB4B	RAB4B	P61018	Ras-related protein Rab-4B	0.810305	0.404208	0.545181
P61019	RAB2A	RAB2A	P61019;Q8WUD1	Ras-related protein Rab-2A	1.7938	0.186863	-1.23011
P61020	RAB5B	RAB5B	P61020	Ras-related protein Rab-5B	1.3869	0.255016	-1.59851
P61026	RAB10	RAB10	P61026	Ras-related protein Rab-10	0.280805	0.734696	-0.503018
P62837	UBE2D2	UBE2D2;UBE2D3	P62837;P61077	Ubiquitin-conjugating enzyme E2 D2;Ubiquitin-conjugating enzyme E2 D3	0.0349138	0.96431	-0.0136948
P61081	UBE2M	UBE2M	P61081	NEDD8-conjugating enzyme Ubc12	0.217022	0.805891	-0.184685
P61086	UBE2K	UBE2K	P61086	Ubiquitin-conjugating enzyme E2 K	0.094609	0.909604	-0.173026
P61088	UBE2N	UBE2N	P61088;Q5JXB2	Ubiquitin-conjugating enzyme E2 N	0.0797802	0.923309	0.050656
P61106	RAB14	RAB14	P61106	Ras-related protein Rab-14	1.34573	0.260185	-0.974849
P61158	ACTR3	ACTR3	P61158;Q9C0K3;Q9P1U1	Actin-related protein 3	0.538358	0.53736	0.547838
P61160	ACTR2	ACTR2	P61160	Actin-related protein 2	1.89885	0.181693	-1.85343
P61163	ACTR1A	ACTR1A	P61163	Alpha-centractin	1.34121	0.262286	-0.383737
P61201	COPS2	COPS2	P61201	COP9 signalosome complex subunit 2	0.164321	0.850061	-0.0856533
P61221	ABCE1	ABCE1	P61221	ATP-binding cassette sub-family E member 1	0.118559	0.890565	0.135241
P61224	RAP1B	RAP1B	P61224;A6NIZ1	Ras-related protein Rap-1b;Ras-related protein Rap-1b-like protein	0.532635	0.543077	-0.670061
P61225	RAP2B	RAP2B	P61225	Ras-related protein Rap-2b	0.256343	0.760879	-0.640491
P61247	RPS3A	RPS3A	P61247	40S ribosomal protein S3a	0.332407	0.686362	-0.354647
P61289	PSME3	PSME3	P61289	Proteasome activator complex subunit 3	1.01876	0.344416	0.604139
P61313	RPL15	RPL15	P61313	60S ribosomal protein L15	0.468673	0.579953	-0.416202
P61353	RPL27	RPL27	P61353	60S ribosomal protein L27	0.837467	0.389284	-1.07487
P61421	ATP6V0D1	ATP6V0D1	P61421	V-type proton ATPase subunit d 1	1.58993	0.219634	-0.624258
P61513	RPL37A	RPL37A	P61513	60S ribosomal protein L37a	2.35405	0.168105	-2.89184
P61586	RHOA	RHOA	P61586	Transforming protein RhoA	0.952666	0.362003	-1.51145
P61604	HSPE1	HSPE1	P61604	10 kDa heat shock protein, mitochondrial	1.35641	0.260397	-1.65106
P61619	SEC61A1	SEC61A1	P61619;Q9H9S3	Protein transport protein Sec61 subunit alpha isoform 1	0.170152	0.844323	-0.859227
P61758	VBP1	VBP1	P61758	Prefoldin subunit 3	0.188391	0.831063	-0.490472
P61764	STXBP1	STXBP1	P61764	Syntaxin-binding protein 1	0.869734	0.382823	0.402426
P61803	DAD1	DAD1	P61803	Dolichyl-diphosphooligosaccharide--protein glycosyltransferase subunit DAD1	0.468415	0.579792	-1.4683
P61916	NPC2	NPC2	P61916	Epididymal secretory protein E1	0.213883	0.809248	0.446021
P61923	COPZ1	COPZ1	P61923	Coatomer subunit zeta-1	0.252192	0.765843	-0.751095
P61960	UFM1	UFM1	P61960	Ubiquitin-fold modifier 1	0.53861	0.538659	0.414646
P61970	NUTF2	NUTF2	P61970	Nuclear transport factor 2	0.0259015	0.9701	0.0660159
P61978	HNRNPK	HNRNPK	P61978	Heterogeneous nuclear ribonucleoprotein K	0.560353	0.525239	0.301149
P61981	YWHAG	YWHAG	P61981	14-3-3 protein gamma;14-3-3 protein gamma, N-terminally processed	1.45371	0.242997	-1.62533
P62081	RPS7	RPS7	P62081	40S ribosomal protein S7	0.108876	0.898088	-0.233715
P62136	PPP1CA	PPP1CA	P62136	Serine/threonine-protein phosphatase PP1-alpha catalytic subunit	1.45766	0.243411	-0.598469
P62140	PPP1CB	PPP1CB	P62140	Serine/threonine-protein phosphatase PP1-beta catalytic subunit	0.742499	0.431286	-0.700278
P62191	PSMC1	PSMC1	P62191	26S protease regulatory subunit 4	0.575152	0.518376	0.108508
P62195	PSMC5	PSMC5	P62195	26S protease regulatory subunit 8	0.039146	0.960156	0.0698872
P62241	RPS8	RPS8	P62241	40S ribosomal protein S8	1.53228	0.229181	-1.31913
P62244	RPS15A	RPS15A	P62244	40S ribosomal protein S15a	1.07543	0.331039	1.9152
P62249	RPS16	RPS16	P62249	40S ribosomal protein S16	0.815704	0.400306	0.46822
P62258	YWHAE	YWHAE	P62258	14-3-3 protein epsilon	0.0457657	0.955853	-0.0849876
P62263	RPS14	RPS14	P62263	40S ribosomal protein S14	0.511735	0.554795	-0.47853
P62266	RPS23	RPS23	P62266	40S ribosomal protein S23	1.74622	0.185461	-1.4409
P62269	RPS18	RPS18	P62269	40S ribosomal protein S18	0.179148	0.8378	0.175781
P62273	RPS29	RPS29	P62273	40S ribosomal protein S29	0.102164	0.900769	0.209585
P62277	RPS13	RPS13	P62277	40S ribosomal protein S13	0.5118	0.555398	0.439886
P62280	RPS11	RPS11	P62280	40S ribosomal protein S11	0.205928	0.813113	0.235818
P62304	SNRPE	SNRPE	P62304	Small nuclear ribonucleoprotein E	1.3523	0.259535	-1.673
P62314	SNRPD1	SNRPD1	P62314	Small nuclear ribonucleoprotein Sm D1	0.394018	0.632289	-0.396347
P62318	SNRPD3	SNRPD3	P62318	Small nuclear ribonucleoprotein Sm D3	0.0471774	0.953542	-0.110593
P62330	ARF6	ARF6	P62330	ADP-ribosylation factor 6	3.10787	0.154889	-1.8687
P62333	PSMC6	PSMC6	P62333	26S protease regulatory subunit 10B	1.7648	0.187827	0.68717
P62424	RPL7A	RPL7A	P62424	60S ribosomal protein L7a	2.80852	0.1704	1.33747
P62495	ETF1	ETF1	P62495	Eukaryotic peptide chain release factor subunit 1	0.217266	0.805652	0.215771
P62701	RPS4X	RPS4X	P62701	40S ribosomal protein S4, X isoform	0.392035	0.633729	-0.188913
P62750	RPL23A	RPL23A	P62750	60S ribosomal protein L23a	0.193713	0.825438	-0.288877
P62753	RPS6	RPS6	P62753	40S ribosomal protein S6	0.277784	0.737658	-0.29375
P62805	HIST1H4A	HIST1H4A	P62805	Histone H4	0.480331	0.572619	0.182843
P62820	RAB1A	RAB1A	P62820;P59190	Ras-related protein Rab-1A	0.374246	0.646817	0.530377
P62826	RAN	RAN	P62826	GTP-binding nuclear protein Ran	0.203755	0.81661	-0.198966
P62829	RPL23	RPL23	P62829	60S ribosomal protein L23	0.867212	0.3822	1.06078
P62841	RPS15	RPS15	P62841	40S ribosomal protein S15	0.616068	0.497367	-2.7146
P62847	RPS24	RPS24	P62847	40S ribosomal protein S24	0.803282	0.408458	-2.0293
P62851	RPS25	RPS25	P62851	40S ribosomal protein S25	0.0473097	0.953887	0.0894788
P62854	RPS26	RPS26;RPS26P11	P62854;Q5JNZ5	40S ribosomal protein S26;Putative 40S ribosomal protein S26-like 1	1.32709	0.262604	-0.638033
P62857	RPS28	RPS28	P62857	40S ribosomal protein S28	0.0982567	0.905355	-0.21809
P62861	FAU	FAU	P62861	40S ribosomal protein S30	0.228475	0.7906	-0.111033
P62873	GNB1	GNB1	P62873;P16520	Guanine nucleotide-binding protein G(I)/G(S)/G(T) subunit beta-1	0.620787	0.495599	0.410041
P62879	GNB2	GNB2	P62879	Guanine nucleotide-binding protein G(I)/G(S)/G(T) subunit beta-2	0.37617	0.646968	0.445693
P62888	RPL30	RPL30	P62888	60S ribosomal protein L30	0.66778	0.465192	-0.500832
P62899	RPL31	RPL31	P62899	60S ribosomal protein L31	0.359359	0.659904	0.516169
P62906	RPL10A	RPL10A	P62906	60S ribosomal protein L10a	0.672536	0.462975	0.692622
P62910	RPL32	RPL32	P62910	60S ribosomal protein L32	0.316048	0.699607	-0.372769
P62913	RPL11	RPL11	P62913	60S ribosomal protein L11	0.605111	0.503026	0.367902
P62917	RPL8	RPL8	P62917	60S ribosomal protein L8	0.0391202	0.9598	-0.140227
P62937	PPIA	PPIA	P62937;P0DN26;A0A0B4J2A2;A0A075B767;A0A075B759;Q9Y536;F5H284;P0DN37	Peptidyl-prolyl cis-trans isomerase A;Peptidyl-prolyl cis-trans isomerase A, N-terminally processed	1.33275	0.26143	-1.07173
P62995	TRA2B	TRA2B	P62995	Transformer-2 protein homolog beta	0.306856	0.708245	0.400113
P63000	RAC1	RAC1;RAC3	P63000;P60763	Ras-related C3 botulinum toxin substrate 1;Ras-related C3 botulinum toxin substrate 3	1.9308	0.179897	3.43379
P63010	AP2B1	AP2B1	P63010	AP-2 complex subunit beta	0.187991	0.831257	-0.183936
P63092	GNAS	GNAS	P63092;Q5JWF2;P38405;P11488;P19087;A8MTJ3	Guanine nucleotide-binding protein G(s) subunit alpha isoforms short;Guanine nucleotide-binding protein G(s) subunit alpha isoforms XLas	1.48654	0.23501	-1.74864
P63104	YWHAZ	YWHAZ	P63104	14-3-3 protein zeta/delta	2.14396	0.173778	-0.753277
P63151	PPP2R2A	PPP2R2A	P63151;Q66LE6;Q00005	Serine/threonine-protein phosphatase 2A 55 kDa regulatory subunit B alpha isoform	0.626782	0.491951	-0.490211
P63172	DYNLT1	DYNLT1	P63172	Dynein light chain Tctex-type 1	1.48272	0.236391	1.16336
P63173	RPL38	RPL38	P63173	60S ribosomal protein L38	0.584905	0.514685	-2.11059
P63241	EIF5A	EIF5A;EIF5AL1	P63241;Q6IS14;Q9GZV4	Eukaryotic translation initiation factor 5A-1;Eukaryotic translation initiation factor 5A-1-like	0.920006	0.373304	-1.64203
P63244	GNB2L1	GNB2L1	P63244	Guanine nucleotide-binding protein subunit beta-2-like 1;Guanine nucleotide-binding protein subunit beta-2-like 1, N-terminally processed	1.10022	0.322403	-0.88619
P63279	UBE2I	UBE2I	P63279	SUMO-conjugating enzyme UBC9	0.576092	0.518036	-1.1879
P67809	YBX1	YBX1	P67809;Q9Y2T7	Nuclease-sensitive element-binding protein 1	1.76961	0.18965	2.12591
P67812	SEC11A	SEC11A	P67812	Signal peptidase complex catalytic subunit SEC11A	0.471376	0.579694	-0.748216
P67936	TPM4	TPM4	P67936;P07951;P06753	Tropomyosin alpha-4 chain	2.41436	0.165731	1.76703
P68036	UBE2L3	UBE2L3	P68036;A0A1B0GUS4	Ubiquitin-conjugating enzyme E2 L3	0.629952	0.490398	0.309752
P68104	EEF1A1	EEF1A1;EEF1A1P5	P68104;Q5VTE0	Elongation factor 1-alpha 1;Putative elongation factor 1-alpha-like 3	1.06937	0.330649	0.314164
P68366	TUBA4A	TUBA4A	P68366	Tubulin alpha-4A chain	0.586908	0.514102	-0.341
P68400	CSNK2A1	CSNK2A1;CSNK2A3	P68400;Q8NEV1	Casein kinase II subunit alpha;Casein kinase II subunit alpha 3	1.06966	0.3312	0.7628
P68402	PAFAH1B2	PAFAH1B2	P68402	Platelet-activating factor acetylhydrolase IB subunit beta	0.328384	0.688733	-0.939552
P68431	HIST1H3A	HIST1H3A;HIST3H3	P68431;Q16695;Q6NXT2	Histone H3.1;Histone H3.1t	0.752678	0.43003	-4.1508
P78330	PSPH	PSPH	P78330	Phosphoserine phosphatase	0.0632426	0.937718	-0.149812
P78344	EIF4G2	EIF4G2	P78344	Eukaryotic translation initiation factor 4 gamma 2	1.30087	0.262469	0.627193
P78347	GTF2I	GTF2I	P78347	General transcription factor II-I	0.0969844	0.906064	-0.284787
P78371	CCT2	CCT2	P78371	T-complex protein 1 subunit beta	1.31248	0.262928	0.605143
P78406	RAE1	RAE1	P78406	mRNA export factor	0.689628	0.455885	-0.79984
P78417	GSTO1	GSTO1	P78417	Glutathione S-transferase omega-1	0.0635781	0.938236	-0.0695222
P78527	PRKDC	PRKDC	P78527	DNA-dependent protein kinase catalytic subunit	0.0192577	0.975425	0.00639407
P78540	ARG2	ARG2	P78540	Arginase-2, mitochondrial	0.16886	0.844937	-0.51381
P78559	MAP1A	MAP1A	P78559	Microtubule-associated protein 1A;MAP1A heavy chain;MAP1 light chain LC2	0.652481	0.472497	-0.276754
P78563	ADARB1	ADARB1	P78563	Double-stranded RNA-specific editase 1	0.520872	0.549966	0.726752
P80217	IFI35	IFI35	P80217	Interferon-induced 35 kDa protein	0.784896	0.409975	0.694342
P80303	NUCB2	NUCB2	P80303	Nucleobindin-2;Nesfatin-1	0.730821	0.433569	0.633996
P80404	ABAT	ABAT	P80404	4-aminobutyrate aminotransferase, mitochondrial	0.416248	0.617611	0.588631
P80723	BASP1	BASP1	P80723	Brain acid soluble protein 1	2.76602	0.153765	3.6453
P82094	TMF1	TMF1	P82094	TATA element modulatory factor	1.11879	0.316276	1.30627
P82650	MRPS22	MRPS22	P82650	28S ribosomal protein S22, mitochondrial	1.15945	0.301878	0.954048
P82930	MRPS34	MRPS34	P82930	28S ribosomal protein S34, mitochondrial	0.43146	0.605112	-0.598563
P82933	MRPS9	MRPS9	P82933	28S ribosomal protein S9, mitochondrial	0.0479961	0.953668	0.15712
P83111	LACTB	LACTB	P83111	Serine beta-lactamase-like protein LACTB, mitochondrial	0.446959	0.597547	-0.575223
P83436	COG7	COG7	P83436	Conserved oligomeric Golgi complex subunit 7	0.170403	0.844159	0.157648
P83731	RPL24	RPL24	P83731	60S ribosomal protein L24	0.245629	0.772716	-0.294778
P84077	ARF1	ARF1	P84077	ADP-ribosylation factor 1	1.09456	0.326105	-3.55631
P84085	ARF5	ARF5	P84085	ADP-ribosylation factor 5	0.623832	0.49452	-1.61533
P84095	RHOG	RHOG	P84095	Rho-related GTP-binding protein RhoG	0.0844307	0.919423	0.0587165
P84098	RPL19	RPL19	P84098	60S ribosomal protein L19	0.324599	0.691397	-0.406135
P84103	SRSF3	SRSF3	P84103	Serine/arginine-rich splicing factor 3	0.878948	0.380383	-0.488692
P84243	H3F3A	H3F3A	P84243	Histone H3.3	0.0846315	0.920062	-0.155921
P98082	DAB2	DAB2	P98082	Disabled homolog 2	1.21505	0.284988	-1.78381
P98175	RBM10	RBM10	P98175	RNA-binding protein 10	0.572181	0.519411	-0.459004
P98179	RBM3	RBM3	P98179	RNA-binding protein 3	0.951715	0.362374	-1.99157
P98194	ATP2C1	ATP2C1	P98194	Calcium-transporting ATPase type 2C member 1	0.220372	0.801826	-0.29314
P99999	CYCS	CYCS	P99999;CON__P62894	Cytochrome c	0.78632	0.410931	1.84128
Q00169	PITPNA	PITPNA	Q00169	Phosphatidylinositol transfer protein alpha isoform	0.610155	0.499994	-0.607125
Q00325	SLC25A3	SLC25A3	Q00325	Phosphate carrier protein, mitochondrial	1.46262	0.243031	-1.03795
Q00341	HDLBP	HDLBP	Q00341	Vigilin	0.182436	0.834935	0.172782
Q00535	CDK5	CDK5	Q00535;P06493;P50750;Q96Q40;O94921;Q07002;Q00536;Q00537	Cyclin-dependent-like kinase 5	1.2465	0.278568	1.56476
Q00577	PURA	PURA	Q00577	Transcriptional activator protein Pur-alpha	0.261709	0.755025	0.270451
Q00610	CLTC	CLTC	Q00610;P53675	Clathrin heavy chain 1	1.51919	0.233946	-0.352381
Q00688	FKBP3	FKBP3	Q00688	Peptidyl-prolyl cis-trans isomerase FKBP3	0.160987	0.851937	-0.315622
Q00796	SORD	SORD	Q00796	Sorbitol dehydrogenase	0.301678	0.716282	-0.360241
Q00839	HNRNPU	HNRNPU	Q00839	Heterogeneous nuclear ribonucleoprotein U	1.40763	0.256736	-0.684577
Q01081	U2AF1	U2AF1;U2AF1L4	Q01081;Q8WU68	Splicing factor U2AF 35 kDa subunit;Splicing factor U2AF 26 kDa subunit	0.182184	0.835068	0.191165
Q01082	SPTBN1	SPTBN1	Q01082;O15020;P11277	Spectrin beta chain, non-erythrocytic 1	0.12882	0.88002	0.107653
Q01105	SET	SET;SETSIP	Q01105;P0DME0	Protein SET;Protein SETSIP	0.433853	0.606469	-1.70516
Q01415	GALK2	GALK2	Q01415	N-acetylgalactosamine kinase	1.26505	0.272212	1.31169
Q01433	AMPD2	AMPD2	Q01433	AMP deaminase 2	0.600088	0.505335	1.16071
Q01459	CTBS	CTBS	Q01459	Di-N-acetylchitobiase	0.338788	0.679537	-0.569548
Q01469	FABP5	FABP5	Q01469;A8MUU1	Fatty acid-binding protein, epidermal	0.179542	0.837132	-0.472447
Q01518	CAP1	CAP1	Q01518	Adenylyl cyclase-associated protein 1	0.275069	0.740195	-0.180238
Q01581	HMGCS1	HMGCS1	Q01581	Hydroxymethylglutaryl-CoA synthase, cytoplasmic	2.57229	0.1655	2.96521
Q01780	EXOSC10	EXOSC10	Q01780	Exosome component 10	0.0928758	0.913252	0.299732
Q01813	PFKP	PFKP	Q01813	ATP-dependent 6-phosphofructokinase, platelet type	0.235197	0.782425	-0.169504
Q01844	EWSR1	EWSR1	Q01844	RNA-binding protein EWS	0.531294	0.543174	-0.65081
Q01995	TAGLN	TAGLN	Q01995	Transgelin	1.43517	0.248973	-1.46448
Q02218	OGDH	OGDH	Q02218;Q9ULD0	2-oxoglutarate dehydrogenase, mitochondrial	0.558246	0.526942	-0.332921
Q02252	ALDH6A1	ALDH6A1	Q02252	Methylmalonate-semialdehyde dehydrogenase [acylating], mitochondrial	0.237211	0.77827	0.236467
Q02543	RPL18A	RPL18A	Q02543	60S ribosomal protein L18a	0.481855	0.570671	-1.70315
Q02750	MAP2K1	MAP2K1	Q02750	Dual specificity mitogen-activated protein kinase kinase 1	1.11646	0.317505	1.75552
Q02790	FKBP4	FKBP4	Q02790	Peptidyl-prolyl cis-trans isomerase FKBP4;Peptidyl-prolyl cis-trans isomerase FKBP4, N-terminally processed	0.216616	0.805047	-0.253514
Q02809	PLOD1	PLOD1	Q02809	Procollagen-lysine,2-oxoglutarate 5-dioxygenase 1	0.3205	0.695762	1.18179
Q02818	NUCB1	NUCB1	Q02818	Nucleobindin-1	0.726098	0.435289	1.49806
Q02878	RPL6	RPL6	Q02878	60S ribosomal protein L6	0.131026	0.878355	0.150941
Q02880	TOP2B	TOP2B	Q02880	DNA topoisomerase 2-beta	0.264818	0.751784	-0.262388
Q02952	AKAP12	AKAP12	Q02952	A-kinase anchor protein 12	0.162515	0.85013	0.220645
Q02978	SLC25A11	SLC25A11	Q02978	Mitochondrial 2-oxoglutarate/malate carrier protein	1.64938	0.210694	-0.668315
Q03001	DST	DST	Q03001	Dystonin	1.2506	0.277581	0.558607
Q03135	CAV1	CAV1	Q03135;P56539	Caveolin-1	0.206293	0.813452	-0.456381
Q03154	ACY1	ACY1	Q03154	Aminoacylase-1	0.0174902	0.977412	-0.0489739
Q03252	LMNB2	LMNB2	Q03252	Lamin-B2	0.52084	0.549667	0.849168
Q03518	TAP1	TAP1	Q03518	Antigen peptide transporter 1	0.151348	0.857681	0.397834
Q03701	CEBPZ	CEBPZ	Q03701	CCAAT/enhancer-binding protein zeta	0.0276317	0.969455	0.0967166
Q04206	RELA	RELA	Q04206	Transcription factor p65	0.0361216	0.963106	-0.0709992
Q04323	UBXN1	UBXN1	Q04323	UBX domain-containing protein 1	2.40224	0.162725	-1.0219
Q04446	GBE1	GBE1	Q04446	1,4-alpha-glucan-branching enzyme	0.161205	0.851678	-0.215019
Q04637	EIF4G1	EIF4G1	Q04637	Eukaryotic translation initiation factor 4 gamma 1	0.104701	0.899332	-0.0353718
Q04721	NOTCH2	NOTCH2	Q04721	Neurogenic locus notch homolog protein 2;Notch 2 extracellular truncation;Notch 2 intracellular domain	0.351981	0.670105	0.705064
Q04760	GLO1	GLO1	Q04760	Lactoylglutathione lyase	0.102836	0.900179	0.09692
Q04828	AKR1C1	AKR1C1	Q04828	Aldo-keto reductase family 1 member C1	0.564481	0.521482	-0.262212
Q04837	SSBP1	SSBP1	Q04837	Single-stranded DNA-binding protein, mitochondrial	0.0838741	0.91983	0.148652
Q04917	YWHAH	YWHAH	Q04917	14-3-3 protein eta	0.337843	0.680376	0.202782
Q05086	UBE3A	UBE3A	Q05086	Ubiquitin-protein ligase E3A	0.601436	0.504985	-0.411846
Q05209	PTPN12	PTPN12	Q05209	Tyrosine-protein phosphatase non-receptor type 12	0.369807	0.650815	0.886338
Q05397	PTK2	PTK2	Q05397	Focal adhesion kinase 1	0.803301	0.408896	-0.781479
Q05519	SRSF11	SRSF11	Q05519	Serine/arginine-rich splicing factor 11	0.43714	0.602429	0.708012
Q05655	PRKCD	PRKCD	Q05655	Protein kinase C delta type;Protein kinase C delta type regulatory subunit;Protein kinase C delta type catalytic subunit	0.848889	0.389986	0.968741
Q05682	CALD1	CALD1	Q05682	Caldesmon	0.148631	0.861293	-0.148706
Q06124	PTPN11	PTPN11	Q06124	Tyrosine-protein phosphatase non-receptor type 11	0.282292	0.734308	-0.411529
Q06136	KDSR	KDSR	Q06136	3-ketodihydrosphingosine reductase	1.32256	0.264342	-1.77918
Q06210	GFPT1	GFPT1	Q06210	Glutamine--fructose-6-phosphate aminotransferase [isomerizing] 1	2.2991	0.154818	-1.04071
Q06265	EXOSC9	EXOSC9	Q06265	Exosome complex component RRP45	0.371057	0.649613	0.220553
Q06278	AOX1	AOX1	Q06278	Aldehyde oxidase	0.387383	0.634767	1.02834
Q06323	PSME1	PSME1	Q06323	Proteasome activator complex subunit 1	1.09912	0.322545	0.52652
Q06830	PRDX1	PRDX1	Q06830	Peroxiredoxin-1	0.90768	0.375071	-0.794806
Q07020	RPL18	RPL18	Q07020	60S ribosomal protein L18	1.65229	0.211769	1.09194
Q07021	C1QBP	C1QBP	Q07021	Complement component 1 Q subcomponent-binding protein, mitochondrial	0.542601	0.538083	-0.340761
Q07065	CKAP4	CKAP4	Q07065;Q96K21	Cytoskeleton-associated protein 4	0.433512	0.605869	-0.107107
Q07157	TJP1	TJP1	Q07157	Tight junction protein ZO-1	0.254345	0.763686	-0.205896
Q07666	KHDRBS1	KHDRBS1	Q07666;Q5VWX1	KH domain-containing, RNA-binding, signal transduction-associated protein 1	0.505658	0.558531	-1.52299
Q07866	KLC1	KLC1	Q07866;Q6P597	Kinesin light chain 1	0.40083	0.626368	-0.773325
Q07954	LRP1	LRP1	Q07954	Prolow-density lipoprotein receptor-related protein 1;Low-density lipoprotein receptor-related protein 1 85 kDa subunit;Low-density lipoprotein receptor-related protein 1 515 kDa subunit;Low-density lipoprotein receptor-related protein 1 intracellular domain	0.182765	0.834905	1.02813
Q07955	SRSF1	SRSF1	Q07955	Serine/arginine-rich splicing factor 1	0.449041	0.59508	0.670031
Q07960	ARHGAP1	ARHGAP1	Q07960	Rho GTPase-activating protein 1	0.284367	0.733467	-0.123878
Q08209	PPP3CA	PPP3CA	Q08209	Serine/threonine-protein phosphatase 2B catalytic subunit alpha isoform	0.0140183	0.981373	-0.0505363
Q08211	DHX9	DHX9	Q08211	ATP-dependent RNA helicase A	1.86775	0.178215	-0.21664
Q08257	CRYZ	CRYZ	Q08257	Quinone oxidoreductase	0.312293	0.703149	0.375355
Q08378	GOLGA3	GOLGA3	Q08378	Golgin subfamily A member 3	0.668698	0.463962	1.25619
Q08379	GOLGA2	GOLGA2	Q08379	Golgin subfamily A member 2	1.06099	0.330736	0.874139
Q08380	LGALS3BP	LGALS3BP	Q08380	Galectin-3-binding protein	1.08537	0.327795	0.666993
Q08426	EHHADH	EHHADH	Q08426	Peroxisomal bifunctional enzyme;Enoyl-CoA hydratase/3,2-trans-enoyl-CoA isomerase;3-hydroxyacyl-CoA dehydrogenase	0.024877	0.969913	-0.0841906
Q08431	MFGE8	MFGE8	Q08431	Lactadherin;Lactadherin short form;Medin	0.372399	0.648398	0.366159
Q08722	CD47	CD47	Q08722	Leukocyte surface antigen CD47	2.01126	0.166451	3.09132
Q08752	PPID	PPID	Q08752	Peptidyl-prolyl cis-trans isomerase D	2.06697	0.172031	1.22378
Q08945	SSRP1	SSRP1	Q08945	FACT complex subunit SSRP1	0.599566	0.505371	-0.426915
Q08AF3	SLFN5	SLFN5	Q08AF3	Schlafen family member 5	0.667383	0.464742	1.18704
Q08AM6	VAC14	VAC14	Q08AM6	Protein VAC14 homolog	0.767515	0.421203	0.332564
Q08J23	NSUN2	NSUN2	Q08J23	tRNA (cytosine(34)-C(5))-methyltransferase	0.851646	0.388388	0.425702
Q09028	RBBP4	RBBP4	Q09028	Histone-binding protein RBBP4	0.889607	0.379599	-0.707819
Q09161	NCBP1	NCBP1	Q09161	Nuclear cap-binding protein subunit 1	0.842064	0.38948	1.13361
Q09666	AHNAK	AHNAK	Q09666	Neuroblast differentiation-associated protein AHNAK	0.689203	0.455397	0.350492
Q0IIM8	TBC1D8B	TBC1D8B	Q0IIM8	TBC1 domain family member 8B	0.163642	0.850748	0.238231
Q0JRZ9	FCHO2	FCHO2	Q0JRZ9	F-BAR domain only protein 2	1.12965	0.310022	2.19263
Q0VDF9	HSPA14	HSPA14	Q0VDF9	Heat shock 70 kDa protein 14	0.31762	0.698862	-0.335875
Q0VDG4	SCRN3	SCRN3	Q0VDG4	Secernin-3	0.344994	0.676608	-0.870987
Q0VGL1	LAMTOR4	LAMTOR4	Q0VGL1	Ragulator complex protein LAMTOR4;Ragulator complex protein LAMTOR4, N-terminally processed	0.0143203	0.981142	-0.0501448
Q0ZGT2	NEXN	NEXN	Q0ZGT2	Nexilin	0.151671	0.858408	0.137156
Q10471	GALNT2	GALNT2	Q10471	Polypeptide N-acetylgalactosaminyltransferase 2;Polypeptide N-acetylgalactosaminyltransferase 2 soluble form	0.0558089	0.946752	0.141609
Q10472	GALNT1	GALNT1	Q10472;Q8IUC8	Polypeptide N-acetylgalactosaminyltransferase 1;Polypeptide N-acetylgalactosaminyltransferase 1 soluble form	0.16255	0.850453	0.417024
Q10567	AP1B1	AP1B1	Q10567	AP-1 complex subunit beta-1	1.12214	0.314422	-1.63103
Q10588	BST1	BST1	Q10588	ADP-ribosyl cyclase/cyclic ADP-ribose hydrolase 2	0.280809	0.735068	-0.368338
Q10713	PMPCA	PMPCA	Q10713	Mitochondrial-processing peptidase subunit alpha	0.566626	0.52197	0.411139
Q12765	SCRN1	SCRN1	Q12765	Secernin-1	2.51779	0.156772	-0.6073
Q12768	KIAA0196	KIAA0196	Q12768	WASH complex subunit strumpellin	1.24615	0.278022	0.667314
Q12769	NUP160	NUP160	Q12769	Nuclear pore complex protein Nup160	1.09431	0.325934	-1.14691
Q12788	TBL3	TBL3	Q12788	Transducin beta-like protein 3	0.467523	0.579505	0.960954
Q12792	TWF1	TWF1	Q12792	Twinfilin-1	0.493604	0.566909	-0.394546
Q12797	ASPH	ASPH	Q12797	Aspartyl/asparaginyl beta-hydroxylase	0.24221	0.77454	-0.161379
Q12800	TFCP2	TFCP2	Q12800	Alpha-globin transcription factor CP2	0.454917	0.59155	0.439499
Q12802	AKAP13	AKAP13	Q12802	A-kinase anchor protein 13	0.731224	0.433824	-0.805092
Q12805	EFEMP1	EFEMP1	Q12805	EGF-containing fibulin-like extracellular matrix protein 1	0.470842	0.579454	-1.04662
Q12849	GRSF1	GRSF1	Q12849	G-rich sequence factor 1	0.0925883	0.91351	0.463136
Q12874	SF3A3	SF3A3	Q12874	Splicing factor 3A subunit 3	0.387283	0.634173	0.570478
Q12884	FAP	FAP	Q12884	Prolyl endopeptidase FAP;Antiplasmin-cleaving enzyme FAP, soluble form	0.751913	0.430222	-0.346024
Q12888	TP53BP1	TP53BP1	Q12888	Tumor suppressor p53-binding protein 1	1.99579	0.167167	2.6484
Q12904	AIMP1	AIMP1	Q12904	Aminoacyl tRNA synthase complex-interacting multifunctional protein 1;Endothelial monocyte-activating polypeptide 2	0.438416	0.601243	-0.167763
Q12905	ILF2	ILF2	Q12905	Interleukin enhancer-binding factor 2	0.285056	0.733178	-0.180935
Q12906	ILF3	ILF3	Q12906	Interleukin enhancer-binding factor 3	0.218047	0.80468	-0.178437
Q12907	LMAN2	LMAN2	Q12907	Vesicular integral-membrane protein VIP36	1.6859	0.197787	-1.17987
Q12929	EPS8	EPS8	Q12929	Epidermal growth factor receptor kinase substrate 8	0.502897	0.559702	0.393202
Q12931	TRAP1	TRAP1	Q12931	Heat shock protein 75 kDa, mitochondrial	0.389422	0.633863	0.347767
Q12959	DLG1	DLG1	Q12959;Q15700	Disks large homolog 1	0.790502	0.411929	0.821968
Q12965	MYO1E	MYO1E	Q12965;O00160	Unconventional myosin-Ie	0.158677	0.854242	0.124314
Q12979	ABR	ABR	Q12979	Active breakpoint cluster region-related protein	2.20381	0.171837	4.4881
Q12996	CSTF3	CSTF3	Q12996	Cleavage stimulation factor subunit 3	0.0258005	0.969862	0.0651427
Q13011	ECH1	ECH1	Q13011	Delta(3,5)-Delta(2,4)-dienoyl-CoA isomerase, mitochondrial	0.528838	0.545086	-0.380879
Q13033	STRN3	STRN3	Q13033	Striatin-3	0.176928	0.839561	-0.288068
Q13042	CDC16	CDC16	Q13042	Cell division cycle protein 16 homolog	0.295701	0.722158	-0.469405
Q13045	FLII	FLII	Q13045	Protein flightless-1 homolog	1.06182	0.331507	0.375491
Q13049	TRIM32	TRIM32	Q13049	E3 ubiquitin-protein ligase TRIM32	1.57535	0.219223	0.923045
Q13057	COASY	COASY	Q13057	Bifunctional coenzyme A synthase;Phosphopantetheine adenylyltransferase;Dephospho-CoA kinase	0.927831	0.372805	0.575537
Q13085	ACACA	ACACA	Q13085	Acetyl-CoA carboxylase 1;Biotin carboxylase	0.622445	0.494859	0.812937
Q13098	GPS1	GPS1	Q13098	COP9 signalosome complex subunit 1	0.164837	0.849725	0.306396
Q13107	USP4	USP4	Q13107	Ubiquitin carboxyl-terminal hydrolase 4	0.840791	0.389186	-1.74203
Q13123	IK	IK	Q13123	Protein Red	0.960297	0.362898	0.816261
Q13126	MTAP	MTAP	Q13126	S-methyl-5-thioadenosine phosphorylase	0.78178	0.4101	0.683879
Q13131	PRKAA1	PRKAA1	Q13131;P54646	5-AMP-activated protein kinase catalytic subunit alpha-1	0.48966	0.569104	-0.199715
Q13144	EIF2B5	EIF2B5	Q13144	Translation initiation factor eIF-2B subunit epsilon	0.341268	0.677013	0.610414
Q13148	TARDBP	TARDBP	Q13148	TAR DNA-binding protein 43	0.726275	0.435701	-0.507135
Q13151	HNRNPA0	HNRNPA0	Q13151	Heterogeneous nuclear ribonucleoprotein A0	1.3159	0.261659	-1.8728
Q13155	AIMP2	AIMP2	Q13155	Aminoacyl tRNA synthase complex-interacting multifunctional protein 2	1.3868	0.254322	-1.43994
Q13162	PRDX4	PRDX4	Q13162	Peroxiredoxin-4	0.0650415	0.937839	0.0562172
Q13177	PAK2	PAK2	Q13177;O75914;Q13153	Serine/threonine-protein kinase PAK 2;PAK-2p27;PAK-2p34	1.70743	0.195489	-0.865227
Q13188	STK3	STK3	Q13188	Serine/threonine-protein kinase 3;Serine/threonine-protein kinase 3 36kDa subunit;Serine/threonine-protein kinase 3 20kDa subunit	0.523156	0.548764	0.94
Q13190	STX5	STX5	Q13190	Syntaxin-5	0.1272	0.88079	0.48297
Q13200	PSMD2	PSMD2	Q13200	26S proteasome non-ATPase regulatory subunit 2	1.74824	0.18578	-0.405289
Q13217	DNAJC3	DNAJC3	Q13217	DnaJ homolog subfamily C member 3	1.67825	0.20346	-1.28735
Q13228	SELENBP1	SELENBP1	Q13228	Selenium-binding protein 1	0.0789007	0.923992	0.0947742
Q13242	SRSF9	SRSF9	Q13242	Serine/arginine-rich splicing factor 9	0.0745261	0.930043	-0.191635
Q13247	SRSF6	SRSF6;SRSF4	Q13247;Q08170	Serine/arginine-rich splicing factor 6;Serine/arginine-rich splicing factor 4	0.796115	0.411962	1.77877
Q13263	TRIM28	TRIM28	Q13263	Transcription intermediary factor 1-beta	1.88454	0.182659	-0.760653
Q13283	G3BP1	G3BP1	Q13283	Ras GTPase-activating protein-binding protein 1	1.80849	0.186032	0.336
Q13286	CLN3	CLN3	Q13286	Battenin	0.620237	0.495974	-1.77656
Q13310	PABPC4	PABPC4	Q13310	Polyadenylate-binding protein 4	0.140638	0.870614	0.0724627
Q13325	IFIT5	IFIT5	Q13325	Interferon-induced protein with tetratricopeptide repeats 5	0.109607	0.898091	-0.304684
Q13347	EIF3I	EIF3I	Q13347	Eukaryotic translation initiation factor 3 subunit I	0.796696	0.412068	-1.05429
Q13363	CTBP1	CTBP1	Q13363	C-terminal-binding protein 1	1.48978	0.236141	-2.37501
Q13404	UBE2V1	UBE2V1	Q13404	Ubiquitin-conjugating enzyme E2 variant 1	0.0477418	0.953707	0.148611
Q13409	DYNC1I2	DYNC1I2	Q13409	Cytoplasmic dynein 1 intermediate chain 2	0.131084	0.878694	0.0972087
Q13418	ILK	ILK	Q13418	Integrin-linked protein kinase	0.0578167	0.94422	-0.0623633
Q13423	NNT	NNT	Q13423	NAD(P) transhydrogenase, mitochondrial	0.230838	0.787596	-0.0923818
Q13425	SNTB2	SNTB2	Q13425	Beta-2-syntrophin	0.0148311	0.981013	-0.0121562
Q13435	SF3B2	SF3B2	Q13435	Splicing factor 3B subunit 2	0.782784	0.40962	0.670924
Q13438	OS9	OS9	Q13438	Protein OS-9	1.8689	0.180251	2.14799
Q13439	GOLGA4	GOLGA4	Q13439	Golgin subfamily A member 4	1.58196	0.219271	3.77268
Q13442	PDAP1	PDAP1	Q13442	28 kDa heat- and acid-stable phosphoprotein	0.0396003	0.960495	-0.14327
Q13443	ADAM9	ADAM9	Q13443	Disintegrin and metalloproteinase domain-containing protein 9	2.37049	0.166108	3.16892
Q13445	TMED1	TMED1	Q13445	Transmembrane emp24 domain-containing protein 1	0.621306	0.495138	-0.825077
Q13451	FKBP5	FKBP5	Q13451	Peptidyl-prolyl cis-trans isomerase FKBP5;Peptidyl-prolyl cis-trans isomerase FKBP5, N-terminally processed	2.54462	0.160226	-1.12287
Q13454	TUSC3	TUSC3	Q13454	Tumor suppressor candidate 3	0.746378	0.43163	0.523131
Q13459	MYO9B	MYO9B	Q13459	Unconventional myosin-IXb	1.8765	0.181674	2.49008
Q13464	ROCK1	ROCK1	Q13464	Rho-associated protein kinase 1	0.212283	0.809308	-0.742082
Q13488	TCIRG1	TCIRG1	Q13488	V-type proton ATPase 116 kDa subunit a isoform 3	0.287173	0.731262	-0.350297
Q13492	PICALM	PICALM	Q13492;O60641	Phosphatidylinositol-binding clathrin assembly protein	0.927159	0.371568	0.860533
Q13501	SQSTM1	SQSTM1	Q13501	Sequestosome-1	1.05119	0.334871	-1.47443
Q13509	TUBB3	TUBB3	Q13509	Tubulin beta-3 chain	1.8504	0.180778	-1.41309
Q13510	ASAH1	ASAH1	Q13510	Acid ceramidase;Acid ceramidase subunit alpha;Acid ceramidase subunit beta	1.93418	0.180312	-1.71729
Q13523	PRPF4B	PRPF4B	Q13523	Serine/threonine-protein kinase PRP4 homolog	0.763829	0.424185	1.26098
Q13526	PIN1	PIN1	Q13526	Peptidyl-prolyl cis-trans isomerase NIMA-interacting 1	0.739087	0.432571	0.619699
Q13546	RIPK1	RIPK1	Q13546	Receptor-interacting serine/threonine-protein kinase 1	0.046574	0.953791	0.0661303
Q13555	CAMK2G	CAMK2G	Q13555	Calcium/calmodulin-dependent protein kinase type II subunit gamma	0.207526	0.812888	-0.654702
Q13557	CAMK2D	CAMK2D	Q13557	Calcium/calmodulin-dependent protein kinase type II subunit delta	0.163213	0.850273	0.110055
Q13561	DCTN2	DCTN2	Q13561	Dynactin subunit 2	0.394232	0.631944	0.16222
Q13564	NAE1	NAE1	Q13564	NEDD8-activating enzyme E1 regulatory subunit	0.770059	0.420332	-0.379199
Q13573	SNW1	SNW1	Q13573	SNW domain-containing protein 1	0.530084	0.543549	0.876077
Q13586	STIM1	STIM1	Q13586	Stromal interaction molecule 1	0.987139	0.356996	1.41926
Q13596	SNX1	SNX1	Q13596	Sorting nexin-1	0.29422	0.723033	0.538471
Q13601	KRR1	KRR1	Q13601	KRR1 small subunit processome component homolog	1.26424	0.271921	1.58904
Q13610	PWP1	PWP1	Q13610	Periodic tryptophan protein 1 homolog	0.0435798	0.956517	-0.115366
Q13616	CUL1	CUL1	Q13616	Cullin-1	0.147022	0.862627	-0.271834
Q13617	CUL2	CUL2	Q13617	Cullin-2	2.53916	0.157259	-1.91342
Q13618	CUL3	CUL3	Q13618	Cullin-3	1.02624	0.343994	0.564523
Q13619	CUL4A	CUL4A	Q13619	Cullin-4A	0.150434	0.859123	-0.44094
Q13620	CUL4B	CUL4B	Q13620	Cullin-4B	0.110521	0.897509	-0.278926
Q13630	TSTA3	TSTA3	Q13630	GDP-L-fucose synthase	1.01592	0.345297	1.32962
Q13637	RAB32	RAB32	Q13637;O14966;P57729	Ras-related protein Rab-32	0.279356	0.735374	-0.667711
Q13641	TPBG	TPBG	Q13641	Trophoblast glycoprotein	0.23516	0.782086	0.217188
Q13642	FHL1	FHL1	Q13642	Four and a half LIM domains protein 1	0.716349	0.43782	-0.862937
Q13643	FHL3	FHL3	Q13643	Four and a half LIM domains protein 3	1.60961	0.22022	1.85548
Q13724	MOGS	MOGS	Q13724	Mannosyl-oligosaccharide glucosidase	0.564898	0.521648	-0.977834
Q13740	ALCAM	ALCAM	Q13740	CD166 antigen	0.0634654	0.937853	0.0610873
Q13769	THOC5	THOC5	Q13769	THO complex subunit 5 homolog	0.471918	0.579725	-1.58027
Q13813	SPTAN1	SPTAN1	Q13813	Spectrin alpha chain, non-erythrocytic 1	0.217705	0.805352	-0.16066
Q13838	DDX39B	DDX39B	Q13838	Spliceosome RNA helicase DDX39B	0.210148	0.811318	-0.202754
Q13867	BLMH	BLMH	Q13867	Bleomycin hydrolase	0.507469	0.55756	-0.272326
Q13884	SNTB1	SNTB1	Q13884	Beta-1-syntrophin	0.0248643	0.969589	-0.0707519
Q6P1K8	GTF2H2C	GTF2H2C;GTF2H2	Q6P1K8;Q13888	General transcription factor IIH subunit 2-like protein;General transcription factor IIH subunit 2	0.618165	0.496182	0.73716
Q13907	IDI1	IDI1	Q13907	Isopentenyl-diphosphate Delta-isomerase 1	0.566996	0.522237	0.814989
Q14008	CKAP5	CKAP5	Q14008	Cytoskeleton-associated protein 5	1.81635	0.186366	0.549641
Q14019	COTL1	COTL1	Q14019	Coactosin-like protein	0.743066	0.431371	-1.76072
Q14103	HNRNPD	HNRNPD	Q14103	Heterogeneous nuclear ribonucleoprotein D0	2.16543	0.174627	-0.924505
Q14108	SCARB2	SCARB2	Q14108	Lysosome membrane protein 2	2.12566	0.176865	-1.35355
Q14137	BOP1	BOP1	Q14137	Ribosome biogenesis protein BOP1	1.14848	0.304925	-0.596951
Q14139	UBE4A	UBE4A	Q14139	Ubiquitin conjugation factor E4 A	0.0437447	0.956556	0.0364285
Q14151	SAFB2	SAFB2	Q14151	Scaffold attachment factor B2	0.0821151	0.921463	0.185988
Q14152	EIF3A	EIF3A	Q14152	Eukaryotic translation initiation factor 3 subunit A	0.131778	0.877829	-0.0496972
Q14155	ARHGEF7	ARHGEF7	Q14155	Rho guanine nucleotide exchange factor 7	0.0536888	0.949975	0.106679
Q14157	UBAP2L	UBAP2L	Q14157	Ubiquitin-associated protein 2-like	0.724008	0.436759	-0.405633
Q14160	SCRIB	SCRIB	Q14160	Protein scribble homolog	0.566646	0.522361	0.844568
Q14161	GIT2	GIT2	Q14161	ARF GTPase-activating protein GIT2	0.426292	0.610488	-0.650746
Q14165	MLEC	MLEC	Q14165	Malectin	1.94187	0.177882	-1.61859
Q14166	TTLL12	TTLL12	Q14166	Tubulin--tyrosine ligase-like protein 12	1.09468	0.326674	0.620767
Q14185	DOCK1	DOCK1	Q14185	Dedicator of cytokinesis protein 1	1.30284	0.264019	0.878163
Q14192	FHL2	FHL2	Q14192	Four and a half LIM domains protein 2	0.758267	0.427332	-0.595766
Q14195	DPYSL3	DPYSL3	Q14195	Dihydropyrimidinase-related protein 3	0.424095	0.611044	-0.408009
Q14203	DCTN1	DCTN1	Q14203	Dynactin subunit 1	0.544022	0.537215	-0.380926
Q14204	DYNC1H1	DYNC1H1	Q14204	Cytoplasmic dynein 1 heavy chain 1	0.178506	0.838482	-0.0511519
Q14232	EIF2B1	EIF2B1	Q14232	Translation initiation factor eIF-2B subunit alpha	0.373671	0.647044	0.353053
Q14240	EIF4A2	EIF4A2	Q14240	Eukaryotic initiation factor 4A-II;Eukaryotic initiation factor 4A-II, N-terminally processed	0.288165	0.72951	-0.212863
Q14247	CTTN	CTTN	Q14247	Src substrate cortactin	0.705416	0.44414	-0.830177
Q14249	ENDOG	ENDOG	Q14249	Endonuclease G, mitochondrial	0.2895	0.72865	0.515213
Q14254	FLOT2	FLOT2	Q14254	Flotillin-2	0.569101	0.521354	0.240215
Q14257	RCN2	RCN2	Q14257	Reticulocalbin-2	0.0827619	0.921749	0.260339
Q14258	TRIM25	TRIM25	Q14258	E3 ubiquitin/ISG15 ligase TRIM25	0.366245	0.653506	-0.0899728
Q14315	FLNC	FLNC	Q14315	Filamin-C	1.50606	0.236587	-0.332659
Q14318	FKBP8	FKBP8	Q14318	Peptidyl-prolyl cis-trans isomerase FKBP8	0.00337189	0.996675	-0.0058829
Q14344	GNA13	GNA13	Q14344	Guanine nucleotide-binding protein subunit alpha-13	0.0119647	0.982792	0.0243289
Q14376	GALE	GALE	Q14376	UDP-glucose 4-epimerase	0.0221776	0.972142	0.0816242
Q14444	CAPRIN1	CAPRIN1	Q14444	Caprin-1	0.015533	0.981077	0.0336564
Q14457	BECN1	BECN1	Q14457	Beclin-1	2.32338	0.158217	-1.55623
Q14498	RBM39	RBM39	Q14498	RNA-binding protein 39	0.0374362	0.962658	-0.0182877
Q14534	SQLE	SQLE	Q14534	Squalene monooxygenase	0.28074	0.734433	0.35921
Q14554	PDIA5	PDIA5	Q14554	Protein disulfide-isomerase A5	0.840814	0.389626	-0.717814
Q14558	PRPSAP1	PRPSAP1	Q14558	Phosphoribosyl pyrophosphate synthase-associated protein 1	0.665453	0.465958	0.369358
Q14573	ITPR3	ITPR3	Q14573	Inositol 1,4,5-trisphosphate receptor type 3	0.324424	0.691242	-0.812312
Q14653	IRF3	IRF3	Q14653	Interferon regulatory factor 3	0.845602	0.389979	-1.37969
Q14657	LAGE3	LAGE3	Q14657	EKC/KEOPS complex subunit LAGE3	0.113932	0.896136	0.131618
Q14669	TRIP12	TRIP12	Q14669	E3 ubiquitin-protein ligase TRIP12	0.552035	0.52961	0.84999
Q14677	CLINT1	CLINT1	Q14677	Clathrin interactor 1	0.342753	0.676629	0.279556
Q14683	SMC1A	SMC1A	Q14683	Structural maintenance of chromosomes protein 1A	0.4457	0.598404	-0.907753
Q14690	PDCD11	PDCD11	Q14690	Protein RRP5 homolog	0.105713	0.898259	-0.145861
Q14692	BMS1	BMS1	Q14692	Ribosome biogenesis protein BMS1 homolog	0.731208	0.43341	1.08359
Q14694	USP10	USP10	Q14694	Ubiquitin carboxyl-terminal hydrolase 10	1.32369	0.26349	1.52047
Q14697	GANAB	GANAB	Q14697	Neutral alpha-glucosidase AB	0.44726	0.597457	0.197069
Q14699	RFTN1	RFTN1	Q14699	Raftlin	0.32416	0.690987	-1.27804
Q14738	PPP2R5D	PPP2R5D	Q14738	Serine/threonine-protein phosphatase 2A 56 kDa regulatory subunit delta isoform	0.791797	0.411063	-0.482505
Q14739	LBR	LBR	Q14739	Lamin-B receptor	0.958506	0.36152	1.39378
Q14746	COG2	COG2	Q14746	Conserved oligomeric Golgi complex subunit 2	0.623263	0.494454	-0.485088
Q14764	MVP	MVP	Q14764	Major vault protein	2.03499	0.170955	-0.363271
Q14767	LTBP2	LTBP2	Q14767	Latent-transforming growth factor beta-binding protein 2	0.59721	0.506236	0.870038
Q14789	GOLGB1	GOLGB1	Q14789	Golgin subfamily B member 1	1.14491	0.304833	0.667659
Q14790	CASP8	CASP8	Q14790	Caspase-8;Caspase-8 subunit p18;Caspase-8 subunit p10	0.501532	0.559668	0.425859
Q14839	CHD4	CHD4	Q14839	Chromodomain-helicase-DNA-binding protein 4	0.521449	0.54975	-0.861533
Q14847	LASP1	LASP1	Q14847	LIM and SH3 domain protein 1	0.736579	0.432689	-0.464706
Q14914	PTGR1	PTGR1	Q14914	Prostaglandin reductase 1	1.78846	0.182812	-0.72322
Q14919	DRAP1	DRAP1	Q14919	Dr1-associated corepressor	0.136395	0.873677	-0.283077
Q14956	GPNMB	GPNMB	Q14956	Transmembrane glycoprotein NMB	0.403054	0.624996	-1.27523
Q14974	KPNB1	KPNB1	Q14974	Importin subunit beta-1	0.0689302	0.934675	-0.0217527
Q14978	NOLC1	NOLC1	Q14978	Nucleolar and coiled-body phosphoprotein 1	1.36185	0.260157	-1.1766
Q14980	NUMA1	NUMA1	Q14980	Nuclear mitotic apparatus protein 1	0.754379	0.429134	0.580341
Q14997	PSME4	PSME4	Q14997	Proteasome activator complex subunit 4	0.284332	0.733134	-0.503277
Q14999	CUL7	CUL7	Q14999	Cullin-7	0.862925	0.383925	-1.21901
Q14C86	GAPVD1	GAPVD1	Q14C86	GTPase-activating protein and VPS9 domain-containing protein 1	0.0361402	0.963462	-0.0658747
Q14CX7	NAA25	NAA25	Q14CX7	N-alpha-acetyltransferase 25, NatB auxiliary subunit	0.139464	0.871694	0.284806
Q15005	SPCS2	SPCS2	Q15005	Signal peptidase complex subunit 2	2.03075	0.167971	-2.62398
Q15006	EMC2	EMC2	Q15006	ER membrane protein complex subunit 2	1.10351	0.320741	1.49908
Q15008	PSMD6	PSMD6	Q15008	26S proteasome non-ATPase regulatory subunit 6	0.235505	0.781999	0.546089
Q15018	FAM175B	FAM175B	Q15018	BRISC complex subunit Abro1	0.643284	0.478678	-0.777191
Q15019	2023-09-02	2023-09-02	Q15019	Septin-2	0.398695	0.627267	0.328384
Q15020	SART3	SART3	Q15020	Squamous cell carcinoma antigen recognized by T-cells 3	0.84332	0.390221	0.626301
Q15024	EXOSC7	EXOSC7	Q15024	Exosome complex component RRP42	0.175353	0.839706	0.262441
Q15029	EFTUD2	EFTUD2	Q15029	116 kDa U5 small nuclear ribonucleoprotein component	0.630366	0.490274	-0.197398
Q15031	LARS2	LARS2	Q15031	Probable leucine--tRNA ligase, mitochondrial	0.345235	0.676455	0.672035
Q15036	SNX17	SNX17	Q15036	Sorting nexin-17	0.119467	0.889457	-0.218144
Q15042	RAB3GAP1	RAB3GAP1	Q15042	Rab3 GTPase-activating protein catalytic subunit	0.433589	0.606095	-0.658005
Q15043	SLC39A14	SLC39A14	Q15043	Zinc transporter ZIP14	0.605564	0.50393	1.22904
Q15046	KARS	KARS	Q15046	Lysine--tRNA ligase	0.383588	0.638626	-0.379519
Q15050	RRS1	RRS1	Q15050	Ribosome biogenesis regulatory protein homolog	0.283269	0.733534	0.905468
Q15056	EIF4H	EIF4H	Q15056	Eukaryotic translation initiation factor 4H	0.113194	0.895754	-0.120816
Q15057	ACAP2	ACAP2	Q15057	Arf-GAP with coiled-coil, ANK repeat and PH domain-containing protein 2	0.792995	0.412172	0.722297
Q15067	ACOX1	ACOX1	Q15067	Peroxisomal acyl-coenzyme A oxidase 1	0.930418	0.372122	1.41889
Q15075	EEA1	EEA1	Q15075	Early endosome antigen 1	0.733988	0.433253	0.369279
Q15084	PDIA6	PDIA6	Q15084	Protein disulfide-isomerase A6	0.544688	0.536817	-0.272049
Q15121	PEA15	PEA15	Q15121	Astrocytic phosphoprotein PEA-15	0.60525	0.503133	-1.69469
Q15126	PMVK	PMVK	Q15126	Phosphomevalonate kinase	1.02915	0.343824	-1.32882
Q15139	PRKD1	PRKD1	Q15139;Q00532;Q92772;Q8IVW4;Q9BZL6;O94806;O76039	Serine/threonine-protein kinase D1	1.83144	0.184848	2.25483
Q15149	PLEC	PLEC	Q15149	Plectin	0.63063	0.490452	-0.203289
Q15165	PON2	PON2	Q15165	Serum paraoxonase/arylesterase 2	0.88853	0.378374	-1.52462
Q15181	PPA1	PPA1	Q15181	Inorganic pyrophosphatase	1.03232	0.344746	-0.673545
Q15185	PTGES3	PTGES3	Q15185	Prostaglandin E synthase 3	1.26185	0.27302	-0.930661
Q15208	STK38	STK38	Q15208	Serine/threonine-protein kinase 38	0.168905	0.845576	0.33045
Q15233	NONO	NONO	Q15233	Non-POU domain-containing octamer-binding protein	1.59262	0.22173	-1.71391
Q15257	PPP2R4	PPP2R4	Q15257	Serine/threonine-protein phosphatase 2A activator	0.673013	0.463575	-1.10539
Q15269	PWP2	PWP2	Q15269	Periodic tryptophan protein 2 homolog	0.336381	0.682867	1.15327
Q15276	RABEP1	RABEP1	Q15276	Rab GTPase-binding effector protein 1	0.38276	0.639151	1.11006
Q15286	RAB35	RAB35	Q15286	Ras-related protein Rab-35	0.646591	0.477325	-1.7444
Q15293	RCN1	RCN1	Q15293	Reticulocalbin-1	1.81077	0.187021	-1.75729
Q15334	LLGL1	LLGL1	Q15334	Lethal(2) giant larvae protein homolog 1	0.857529	0.387692	-1.07637
Q15345	LRRC41	LRRC41	Q15345	Leucine-rich repeat-containing protein 41	0.0829598	0.921639	-0.215854
Q15363	TMED2	TMED2	Q15363	Transmembrane emp24 domain-containing protein 2	1.81233	0.187358	-2.33646
Q15365	PCBP1	PCBP1	Q15365	Poly(rC)-binding protein 1	0.381752	0.639741	0.345644
Q15366	PCBP2	PCBP2	Q15366	Poly(rC)-binding protein 2	0.904197	0.374943	0.573889
Q15370	TCEB2	TCEB2	Q15370	Transcription elongation factor B polypeptide 2	1.67791	0.202605	-2.11703
Q15386	UBE3C	UBE3C	Q15386	Ubiquitin-protein ligase E3C	0.0466525	0.953893	0.104035
Q15392	DHCR24	DHCR24	Q15392	Delta(24)-sterol reductase	0.916681	0.373368	-1.65884
Q15393	SF3B3	SF3B3	Q15393	Splicing factor 3B subunit 3	1.46093	0.242852	-0.38763
Q15397	KIAA0020	KIAA0020	Q15397	Pumilio domain-containing protein KIAA0020	0.00329628	0.996474	-0.0159818
Q15404	RSU1	RSU1	Q15404	Ras suppressor protein 1	0.470249	0.57965	0.415122
Q15417	CNN3	CNN3	Q15417	Calponin-3	0.844198	0.389909	1.17968
Q15424	SAFB	SAFB	Q15424	Scaffold attachment factor B1	0.149529	0.859953	0.0964985
Q15427	SF3B4	SF3B4	Q15427	Splicing factor 3B subunit 4	0.462104	0.585516	-0.548541
Q15428	SF3A2	SF3A2	Q15428	Splicing factor 3A subunit 2	0.485365	0.5699	-0.904146
Q15435	PPP1R7	PPP1R7	Q15435	Protein phosphatase 1 regulatory subunit 7	0.0620546	0.939772	-0.0952517
Q15436	SEC23A	SEC23A	Q15436	Protein transport protein Sec23A	0.139835	0.871555	-0.105586
Q15437	SEC23B	SEC23B	Q15437	Protein transport protein Sec23B	0.285325	0.732721	0.450825
Q15459	SF3A1	SF3A1	Q15459	Splicing factor 3A subunit 1	0.0337551	0.963332	-0.0424735
Q15477	SKIV2L	SKIV2L	Q15477	Helicase SKI2W	0.594094	0.508693	0.411705
Q15582	TGFBI	TGFBI	Q15582	Transforming growth factor-beta-induced protein ig-h3	0.0452508	0.955123	-0.0886472
Q15628	TRADD	TRADD	Q15628	Tumor necrosis factor receptor type 1-associated DEATH domain protein	0.689186	0.454988	-0.557728
Q15631	TSN	TSN	Q15631	Translin	0.441282	0.599031	-1.19977
Q15642	TRIP10	TRIP10	Q15642	Cdc42-interacting protein 4	0.066505	0.936399	-0.207035
Q15643	TRIP11	TRIP11	Q15643	Thyroid receptor-interacting protein 11	0.830494	0.391925	1.85363
Q15654	TRIP6	TRIP6	Q15654	Thyroid receptor-interacting protein 6	0.439729	0.600747	-0.374279
Q15691	MAPRE1	MAPRE1	Q15691	Microtubule-associated protein RP/EB family member 1	1.33933	0.262514	-0.533328
Q15717	ELAVL1	ELAVL1	Q15717;Q12926;P26378	ELAV-like protein 1	0.0496645	0.951783	0.0219129
Q15738	NSDHL	NSDHL	Q15738	Sterol-4-alpha-carboxylate 3-dehydrogenase, decarboxylating	0.0971772	0.906359	0.0704339
Q15746	MYLK	MYLK	Q15746	Myosin light chain kinase, smooth muscle;Myosin light chain kinase, smooth muscle, deglutamylated form	0.182473	0.835214	-0.200727
Q15750	TAB1	TAB1	Q15750	TGF-beta-activated kinase 1 and MAP3K7-binding protein 1	1.23872	0.27855	0.746787
Q15758	SLC1A5	SLC1A5	Q15758	Neutral amino acid transporter B(0)	0.78492	0.410397	1.15641
Q15785	TOMM34	TOMM34	Q15785	Mitochondrial import receptor subunit TOM34	0.868807	0.38204	1.48005
Q15796	SMAD2	SMAD2;SMAD3	Q15796;P84022;O15198	Mothers against decapentaplegic homolog 2;Mothers against decapentaplegic homolog 3	1.42549	0.249853	-0.381082
Q15813	TBCE	TBCE	Q15813	Tubulin-specific chaperone E	0.00189079	0.998084	0.00166639
Q15843	NEDD8	NEDD8	Q15843	NEDD8	0.084603	0.919792	-0.232824
Q15907	RAB11B	RAB11B	Q15907	Ras-related protein Rab-11B	0.328214	0.688488	-0.209976
Q15942	ZYX	ZYX	Q15942	Zyxin	1.45767	0.24416	-0.723727
Q16134	ETFDH	ETFDH	Q16134	Electron transfer flavoprotein-ubiquinone oxidoreductase, mitochondrial	0.855329	0.387675	0.735684
Q16181	2023-09-07	2023-09-07	Q16181;Q6ZU15	Septin-7	0.722073	0.43603	-0.532686
Q16186	ADRM1	ADRM1	Q16186	Proteasomal ubiquitin receptor ADRM1	0.865026	0.383228	0.773301
Q16204	CCDC6	CCDC6	Q16204	Coiled-coil domain-containing protein 6	0.14796	0.861025	0.14462
Q16222	UAP1	UAP1	Q16222	UDP-N-acetylhexosamine pyrophosphorylase;UDP-N-acetylgalactosamine pyrophosphorylase;UDP-N-acetylglucosamine pyrophosphorylase	0.604057	0.503528	-1.04753
Q16270	IGFBP7	IGFBP7	Q16270	Insulin-like growth factor-binding protein 7	0.286216	0.731384	0.495207
Q16401	PSMD5	PSMD5	Q16401	26S proteasome non-ATPase regulatory subunit 5	0.0208878	0.974303	0.0211461
Q16513	PKN2	PKN2	Q16513	Serine/threonine-protein kinase N2	0.740696	0.432253	0.806656
Q16531	DDB1	DDB1	Q16531	DNA damage-binding protein 1	1.05898	0.33187	-0.734505
Q16537	PPP2R5E	PPP2R5E	Q16537	Serine/threonine-protein phosphatase 2A 56 kDa regulatory subunit epsilon isoform	0.0213793	0.973682	-0.0348516
Q16539	MAPK14	MAPK14	Q16539	Mitogen-activated protein kinase 14	0.439856	0.600857	-0.572977
Q16543	CDC37	CDC37	Q16543	Hsp90 co-chaperone Cdc37;Hsp90 co-chaperone Cdc37, N-terminally processed	0.107343	0.898743	0.386236
Q16555	DPYSL2	DPYSL2	Q16555	Dihydropyrimidinase-related protein 2	0.818479	0.399653	-0.48966
Q16576	RBBP7	RBBP7	Q16576	Histone-binding protein RBBP7	0.509792	0.555462	-1.17111
Q16629	SRSF7	SRSF7	Q16629	Serine/arginine-rich splicing factor 7	0.0925564	0.913237	0.106681
Q16630	CPSF6	CPSF6	Q16630	Cleavage and polyadenylation specificity factor subunit 6	0.319744	0.697374	0.372164
Q16643	DBN1	DBN1	Q16643	Drebrin	1.49327	0.236168	-0.930975
Q16647	PTGIS	PTGIS	Q16647	Prostacyclin synthase	0.645935	0.477574	1.28845
Q16658	FSCN1	FSCN1	Q16658	Fascin	2.49087	0.159458	-0.71313
Q16666	IFI16	IFI16	Q16666;Q6K0P9	Gamma-interferon-inducible protein 16	0.428303	0.609522	-0.464764
Q16678	CYP1B1	CYP1B1	Q16678	Cytochrome P450 1B1	0.371747	0.649036	-1.63907
Q16698	DECR1	DECR1	Q16698	2,4-dienoyl-CoA reductase, mitochondrial	0.266148	0.750999	0.0908407
Q16706	MAN2A1	MAN2A1	Q16706	Alpha-mannosidase 2	0.856887	0.387781	-0.863301
Q16718	NDUFA5	NDUFA5	Q16718	NADH dehydrogenase [ubiquinone] 1 alpha subcomplex subunit 5	0.58882	0.512837	1.2592
Q16740	CLPP	CLPP	Q16740	ATP-dependent Clp protease proteolytic subunit, mitochondrial	1.45183	0.243832	1.79204
Q16762	TST	TST	Q16762	Thiosulfate sulfurtransferase	0.0425552	0.956397	-0.0996463
Q16774	GUK1	GUK1	Q16774	Guanylate kinase	0.450405	0.594387	0.82182
Q16777	HIST2H2AC	HIST2H2AC;HIST2H2AA3	Q16777;Q6FI13	Histone H2A type 2-C;Histone H2A type 2-A	2.46558	0.166033	0.903072
Q16795	NDUFA9	NDUFA9	Q16795	NADH dehydrogenase [ubiquinone] 1 alpha subcomplex subunit 9, mitochondrial	0.492744	0.567878	0.471753
Q16798	ME3	ME3	Q16798	NADP-dependent malic enzyme, mitochondrial	0.478234	0.57484	-1.17408
Q16822	PCK2	PCK2	Q16822	Phosphoenolpyruvate carboxykinase [GTP], mitochondrial	0.160202	0.852808	0.144087
Q16831	UPP1	UPP1	Q16831	Uridine phosphorylase 1	0.300659	0.717132	0.696137
Q16836	HADH	HADH	Q16836	Hydroxyacyl-coenzyme A dehydrogenase, mitochondrial	0.874057	0.382163	-1.47397
Q16850	CYP51A1	CYP51A1	Q16850	Lanosterol 14-alpha demethylase	0.0956489	0.90856	-0.0704015
Q16851	UGP2	UGP2	Q16851	UTP--glucose-1-phosphate uridylyltransferase	1.21339	0.283935	0.573126
Q16881	TXNRD1	TXNRD1	Q16881	Thioredoxin reductase 1, cytoplasmic	1.41464	0.255362	-0.156788
Q16891	IMMT	IMMT	Q16891	MICOS complex subunit MIC60	1.23191	0.278591	0.643173
Q1KMD3	HNRNPUL2	HNRNPUL2	Q1KMD3	Heterogeneous nuclear ribonucleoprotein U-like protein 2	1.08788	0.327966	-0.913039
Q27J81	INF2	INF2	Q27J81	Inverted formin-2	0.163699	0.850827	0.184519
Q29RF7	PDS5A	PDS5A	Q29RF7	Sister chromatid cohesion protein PDS5 homolog A	0.277444	0.738178	-0.226274
Q2M2I8	AAK1	AAK1	Q2M2I8;Q9NSY1	AP2-associated protein kinase 1	0.187977	0.830925	0.451658
Q2M389	KIAA1033	KIAA1033	Q2M389	WASH complex subunit 7	0.388317	0.634138	0.362993
Q2NL82	TSR1	TSR1	Q2NL82	Pre-rRNA-processing protein TSR1 homolog	0.491585	0.568	0.887121
Q2TAA2	IAH1	IAH1	Q2TAA2	Isoamyl acetate-hydrolyzing esterase 1 homolog	0.729054	0.435657	0.489604
Q2TAA5	ALG11	ALG11	Q2TAA5	GDP-Man:Man(3)GlcNAc(2)-PP-Dol alpha-1,2-mannosyltransferase	0.293596	0.7237	0.370663
Q2TAL8	QRICH1	QRICH1	Q2TAL8	Glutamine-rich protein 1	0.141257	0.870797	-0.182801
Q2TAY7	SMU1	SMU1	Q2TAY7	WD40 repeat-containing protein SMU1;WD40 repeat-containing protein SMU1, N-terminally processed	0.103871	0.899735	-0.340106
Q32MZ4	LRRFIP1	LRRFIP1	Q32MZ4	Leucine-rich repeat flightless-interacting protein 1	1.3415	0.262957	-1.80719
Q32P28	LEPRE1	LEPRE1	Q32P28	Prolyl 3-hydroxylase 1	0.265049	0.752322	-0.117115
Q32P44	EML3	EML3	Q32P44	Echinoderm microtubule-associated protein-like 3	0.0347169	0.96385	0.0828521
Q3KQU3	MAP7D1	MAP7D1	Q3KQU3	MAP7 domain-containing protein 1	1.75654	0.187924	2.45455
Q3KQV9	UAP1L1	UAP1L1	Q3KQV9	UDP-N-acetylhexosamine pyrophosphorylase-like protein 1	0.164687	0.849506	-0.122367
Q3LXA3	DAK	DAK	Q3LXA3	Bifunctional ATP-dependent dihydroxyacetone kinase/FAD-AMP lyase (cyclizing);ATP-dependent dihydroxyacetone kinase;FAD-AMP lyase (cyclizing)	1.30749	0.263773	1.21852
Q3SY69	ALDH1L2	ALDH1L2	Q3SY69	Mitochondrial 10-formyltetrahydrofolate dehydrogenase	0.413499	0.619241	-0.160965
Q3ZCM7	TUBB8	TUBB8	Q3ZCM7	Tubulin beta-8 chain	0.864228	0.382914	-1.13136
Q3ZCQ8	TIMM50	TIMM50	Q3ZCQ8	Mitochondrial import inner membrane translocase subunit TIM50	1.02647	0.34453	1.04858
Q49A26	GLYR1	GLYR1	Q49A26	Putative oxidoreductase GLYR1	0.839721	0.389296	1.01701
Q4G0J3	LARP7	LARP7	Q4G0J3	La-related protein 7	0.0768092	0.926452	-0.140368
Q4G0N4	NADK2	NADK2	Q4G0N4	NAD kinase 2, mitochondrial	0.510906	0.555745	0.621474
Q4G176	ACSF3	ACSF3	Q4G176	Acyl-CoA synthetase family member 3, mitochondrial	0.505885	0.55868	0.61995
Q4KMQ2	ANO6	ANO6	Q4KMQ2	Anoctamin-6	0.244333	0.774375	0.379141
Q4V328	GRIPAP1	GRIPAP1	Q4V328	GRIP1-associated protein 1	0.0199694	0.975005	-0.077167
Q4V9L6	TMEM119	TMEM119	Q4V9L6	Transmembrane protein 119	0.0508568	0.950486	-0.0938479
Q52LJ0	FAM98B	FAM98B	Q52LJ0	Protein FAM98B	0.243884	0.774343	-0.463052
Q53EL6	PDCD4	PDCD4	Q53EL6	Programmed cell death protein 4	0.141792	0.869783	-0.425882
Q53EP0	FNDC3B	FNDC3B	Q53EP0	Fibronectin type III domain-containing protein 3B	0.12656	0.88143	0.101286
Q53FA7	TP53I3	TP53I3	Q53FA7	Quinone oxidoreductase PIG3	0.394779	0.631093	0.399666
Q53GQ0	HSD17B12	HSD17B12	Q53GQ0	Very-long-chain 3-oxoacyl-CoA reductase	0.746734	0.431775	-0.42777
Q53GS9	USP39	USP39	Q53GS9	U4/U6.U5 tri-snRNP-associated protein 2	0.0650028	0.937618	0.157905
Q53H12	AGK	AGK	Q53H12	Acylglycerol kinase, mitochondrial	0.158329	0.854049	-0.26348
Q53H82	LACTB2	LACTB2	Q53H82	Beta-lactamase-like protein 2	0.509948	0.555774	-0.244389
Q53T59	HS1BP3	HS1BP3	Q53T59	HCLS1-binding protein 3	0.061131	0.940406	0.198396
Q58FF8	HSP90AB2P	HSP90AB2P	Q58FF8	Putative heat shock protein HSP 90-beta 2	0.323269	0.691885	-0.730427
Q5EB52	MEST	MEST	Q5EB52	Mesoderm-specific transcript homolog protein	0.259017	0.758261	-0.493547
Q5GLZ8	HERC4	HERC4	Q5GLZ8	Probable E3 ubiquitin-protein ligase HERC4	0.327207	0.689727	0.931554
Q5H8A4	PIGG	PIGG	Q5H8A4	GPI ethanolamine phosphate transferase 2	0.360377	0.658967	0.685122
Q5H9R7	PPP6R3	PPP6R3	Q5H9R7	Serine/threonine-protein phosphatase 6 regulatory subunit 3	0.789718	0.411222	-0.555773
Q5HYI7	MTX3	MTX3	Q5HYI7	Metaxin-3	0.0761665	0.927165	-0.183034
Q5JPE7	NOMO2	NOMO2;NOMO3;NOMO1	Q5JPE7;P69849;Q15155	Nodal modulator 2;Nodal modulator 3;Nodal modulator 1	0.63081	0.490762	0.475954
Q5JPH6	EARS2	EARS2	Q5JPH6	Probable glutamate--tRNA ligase, mitochondrial	0.00160577	0.998192	0.00455467
Q5JRA6	MIA3	MIA3	Q5JRA6	Melanoma inhibitory activity protein 3	0.792916	0.411739	1.00642
Q5JRX3	PITRM1	PITRM1	Q5JRX3	Presequence protease, mitochondrial	0.180236	0.836528	-0.104758
Q5JS37	NHLRC3	NHLRC3	Q5JS37	NHL repeat-containing protein 3	0.156478	0.857059	-0.404235
Q5JSL3	DOCK11	DOCK11	Q5JSL3	Dedicator of cytokinesis protein 11	0.46043	0.585249	0.497573
Q5JTH9	RRP12	RRP12	Q5JTH9	RRP12-like protein	0.359977	0.659199	-0.136408
Q5JTV8	TOR1AIP1	TOR1AIP1	Q5JTV8	Torsin-1A-interacting protein 1	0.0081069	0.988609	0.0109266
Q5JTZ9	AARS2	AARS2	Q5JTZ9	Alanine--tRNA ligase, mitochondrial	0.346789	0.674707	0.971795
Q5K651	SAMD9	SAMD9	Q5K651	Sterile alpha motif domain-containing protein 9	0.473427	0.578892	0.783025
Q5PRF9	SAMD4B	SAMD4B	Q5PRF9;Q9UPU9	Protein Smaug homolog 2	0.105241	0.898588	0.317209
Q5QJE6	DNTTIP2	DNTTIP2	Q5QJE6	Deoxynucleotidyltransferase terminal-interacting protein 2	0.959887	0.361554	1.0496
Q5SRE5	NUP188	NUP188	Q5SRE5	Nucleoporin NUP188 homolog	0.766825	0.421601	1.12163
Q5SSJ5	HP1BP3	HP1BP3	Q5SSJ5	Heterochromatin protein 1-binding protein 3	0.127959	0.880234	0.130394
Q5SXH7	PLEKHS1	PLEKHS1	Q5SXH7	Pleckstrin homology domain-containing family S member 1	1.13092	0.309594	4.06472
Q5SY16	NOL9	NOL9	Q5SY16	Polynucleotide 5-hydroxyl-kinase NOL9	0.868886	0.382397	1.25569
Q5T1M5	FKBP15	FKBP15	Q5T1M5	FK506-binding protein 15	0.0898899	0.916879	-0.134279
Q5T440	IBA57	IBA57	Q5T440	Putative transferase CAF17, mitochondrial	0.451657	0.594094	1.10474
Q5T447	HECTD3	HECTD3	Q5T447	E3 ubiquitin-protein ligase HECTD3	0.194858	0.825648	0.424305
Q5T4S7	UBR4	UBR4	Q5T4S7	E3 ubiquitin-protein ligase UBR4	0.410559	0.621729	-0.480994
Q5T5C0	STXBP5	STXBP5	Q5T5C0	Syntaxin-binding protein 5	0.660893	0.470472	0.661341
Q5T6V5	C9orf64	C9orf64	Q5T6V5	UPF0553 protein C9orf64	0.470929	0.57959	-0.863037
Q5T9A4	ATAD3B	ATAD3B	Q5T9A4	ATPase family AAA domain-containing protein 3B	0.611316	0.499355	-1.31328
Q5TAQ9	DCAF8	DCAF8	Q5TAQ9	DDB1- and CUL4-associated factor 8	0.808389	0.405456	1.51302
Q5TDH0	DDI2	DDI2	Q5TDH0	Protein DDI1 homolog 2	0.183057	0.835173	-0.239587
Q5TEC6	HIST2H3PS2	HIST2H3PS2	Q5TEC6	Histone H3	3.70199	0.0862857	4.45002
Q5TFE4	NT5DC1	NT5DC1	Q5TFE4	5-nucleotidase domain-containing protein 1	0.15433	0.857473	-0.425773
Q5VIR6	VPS53	VPS53	Q5VIR6	Vacuolar protein sorting-associated protein 53 homolog	0.131976	0.878012	-0.105148
Q5VSL9	STRIP1	STRIP1	Q5VSL9;Q9ULQ0	Striatin-interacting protein 1	1.16116	0.302435	0.681969
Q5VT25	CDC42BPA	CDC42BPA	Q5VT25	Serine/threonine-protein kinase MRCK alpha	0.569434	0.521295	-0.572515
Q5VTR2	RNF20	RNF20	Q5VTR2	E3 ubiquitin-protein ligase BRE1A	0.0177165	0.977269	-0.0508134
Q5VW32	BROX	BROX	Q5VW32	BRO1 domain-containing protein BROX	1.02755	0.344388	-1.00686
Q5VW36	FOCAD	FOCAD	Q5VW36	Focadhesin	0.203095	0.815507	-0.342678
Q5VYK3	ECM29	ECM29	Q5VYK3	Proteasome-associated protein ECM29 homolog	0.745242	0.43165	0.220583
Q5VYS8	ZCCHC6	ZCCHC6	Q5VYS8	Terminal uridylyltransferase 7	0.296345	0.721858	-0.54666
Q5VZ89	DENND4C	DENND4C	Q5VZ89	DENN domain-containing protein 4C	0.0838913	0.920146	-0.304336
Q5W0V3	FAM160B1	FAM160B1	Q5W0V3	Protein FAM160B1	1.4563	0.243988	-0.625573
Q5XKP0	QIL1	QIL1	Q5XKP0	Protein QIL1	0.689231	0.455695	-0.978037
Q5ZPR3	CD276	CD276	Q5ZPR3	CD276 antigen	0.118351	0.890752	0.320379
Q63HN8	RNF213	RNF213	Q63HN8	E3 ubiquitin-protein ligase RNF213	0.12203	0.886499	-0.292596
Q63HR2	TNS2	TNS2	Q63HR2	Tensin-2	0.433492	0.605495	0.987103
Q63ZY3	KANK2	KANK2	Q63ZY3	KN motif and ankyrin repeat domain-containing protein 2	0.365756	0.654112	0.733901
Q641Q2	FAM21A	FAM21A	Q641Q2	WASH complex subunit FAM21A	0.461135	0.585051	0.20233
Q658Y4	FAM91A1	FAM91A1	Q658Y4	Protein FAM91A1	0.438154	0.601033	0.820989
Q66K14	TBC1D9B	TBC1D9B	Q66K14	TBC1 domain family member 9B	0.37564	0.647497	0.501376
Q66K74	MAP1S	MAP1S	Q66K74	Microtubule-associated protein 1S;MAP1S heavy chain;MAP1S light chain	0.0509277	0.950605	0.0278721
Q676U5	ATG16L1	ATG16L1	Q676U5	Autophagy-related protein 16-1	0.175634	0.840002	0.488654
Q68CZ2	TNS3	TNS3	Q68CZ2	Tensin-3	0.00157694	0.997565	0.00600457
Q68E01	INTS3	INTS3	Q68E01	Integrator complex subunit 3	1.18312	0.296849	-1.22974
Q68EM7	ARHGAP17	ARHGAP17	Q68EM7	Rho GTPase-activating protein 17	0.490826	0.568804	-0.384981
Q69YQ0	SPECC1L	SPECC1L	Q69YQ0	Cytospin-A	0.285548	0.732519	0.523787
Q6DD88	ATL3	ATL3	Q6DD88	Atlastin-3	0.783487	0.409442	-0.810974
Q6DKI1	RPL7L1	RPL7L1	Q6DKI1	60S ribosomal protein L7-like 1	0.484762	0.569352	0.945369
Q6DKJ4	NXN	NXN	Q6DKJ4	Nucleoredoxin	0.879056	0.381309	-0.62985
Q6EMK4	VASN	VASN	Q6EMK4	Vasorin	0.920279	0.373467	0.958582
Q6FI81	CIAPIN1	CIAPIN1	Q6FI81	Anamorsin	0.242747	0.774694	0.281632
Q6GMV2	SMYD5	SMYD5	Q6GMV2	SET and MYND domain-containing protein 5	0.620094	0.495762	-0.820537
Q6GMV3	PTRHD1	PTRHD1	Q6GMV3	Putative peptidyl-tRNA hydrolase PTRHD1	0.37706	0.645414	0.761068
Q6IAA8	LAMTOR1	LAMTOR1	Q6IAA8	Ragulator complex protein LAMTOR1	0.179676	0.837129	-0.113539
Q6IAN0	DHRS7B	DHRS7B	Q6IAN0	Dehydrogenase/reductase SDR family member 7B	1.22529	0.279585	0.728259
Q6IBS0	TWF2	TWF2	Q6IBS0	Twinfilin-2	0.461488	0.584961	0.221298
Q6L8Q7	PDE12	PDE12	Q6L8Q7	2,5-phosphodiesterase 12	0.204552	0.815227	-0.328703
Q6N075	MFSD5	MFSD5	Q6N075	Molybdate-anion transporter	0.430493	0.606361	0.521887
Q8TCE6	FAM45A	FAM45A;FAM45B	Q8TCE6;Q6NSW5	Protein FAM45A;Protein FAM45B	1.59057	0.221323	0.997587
Q6NUK1	SLC25A24	SLC25A24	Q6NUK1	Calcium-binding mitochondrial carrier protein SCaMC-1	1.61413	0.221905	-1.17536
Q6NUM9	RETSAT	RETSAT	Q6NUM9	All-trans-retinol 13,14-reductase	0.417266	0.616616	-0.380203
Q6NUQ1	RINT1	RINT1	Q6NUQ1	RAD50-interacting protein 1	0.795031	0.411498	-0.812274
Q6NUQ4	TMEM214	TMEM214	Q6NUQ4	Transmembrane protein 214	0.699777	0.448018	0.601294
Q6NVY1	HIBCH	HIBCH	Q6NVY1	3-hydroxyisobutyryl-CoA hydrolase, mitochondrial	1.02039	0.344578	-0.65877
Q6NYC1	JMJD6	JMJD6	Q6NYC1	Bifunctional arginine demethylase and lysyl-hydroxylase JMJD6	0.181358	0.835119	-0.272476
Q6NYC8	PPP1R18	PPP1R18	Q6NYC8	Phostensin	0.540328	0.538361	-0.211142
Q6NZI2	PTRF	PTRF	Q6NZI2	Polymerase I and transcript release factor	0.946271	0.362043	-0.452725
Q6P158	DHX57	DHX57	Q6P158	Putative ATP-dependent RNA helicase DHX57	1.43067	0.247494	0.895765
Q6P1M0	SLC27A4	SLC27A4	Q6P1M0	Long-chain fatty acid transport protein 4	0.0523661	0.95065	0.110612
Q6P1N0	CC2D1A	CC2D1A	Q6P1N0	Coiled-coil and C2 domain-containing protein 1A	0.315459	0.700351	0.486085
Q6P2E9	EDC4	EDC4	Q6P2E9	Enhancer of mRNA-decapping protein 4	1.08766	0.326838	1.09786
Q6P2Q9	PRPF8	PRPF8	Q6P2Q9	Pre-mRNA-processing-splicing factor 8	0.0641992	0.938482	-0.0351327
Q6P3W7	SCYL2	SCYL2	Q6P3W7	SCY1-like protein 2	0.176777	0.83943	0.252003
Q6P3X3	TTC27	TTC27	Q6P3X3	Tetratricopeptide repeat protein 27	0.0225775	0.971291	0.073246
Q6P4Q7	CNNM4	CNNM4	Q6P4Q7	Metal transporter CNNM4	2.09467	0.171633	2.70937
Q6P587	FAHD1	FAHD1	Q6P587	Acylpyruvase FAHD1, mitochondrial	0.0720157	0.933016	-0.204846
Q6P996	PDXDC1	PDXDC1	Q6P996;Q6P474	Pyridoxal-dependent decarboxylase domain-containing protein 1	0.0893395	0.916614	0.104021
Q6P9B6	TLDC1	TLDC1	Q6P9B6	TLD domain-containing protein 1	0.419802	0.614855	0.676623
Q6P9B9	INTS5	INTS5	Q6P9B9	Integrator complex subunit 5	0.045046	0.955122	0.097441
Q6PCE3	PGM2L1	PGM2L1	Q6PCE3	Glucose 1,6-bisphosphate synthase	0.374802	0.647782	-0.270009
Q6PGP7	TTC37	TTC37	Q6PGP7	Tetratricopeptide repeat protein 37	0.586413	0.514173	0.875476
Q6PI48	DARS2	DARS2	Q6PI48	Aspartate--tRNA ligase, mitochondrial	1.02098	0.345873	1.1358
Q6PIU2	NCEH1	NCEH1	Q6PIU2	Neutral cholesterol ester hydrolase 1	0.0268527	0.969954	0.0145906
Q6PKG0	LARP1	LARP1	Q6PKG0;Q659C4	La-related protein 1	1.36097	0.259476	0.909725
Q6PML9	SLC30A9	SLC30A9	Q6PML9	Zinc transporter 9	2.05115	0.171878	2.00278
Q6RW13	AGTRAP	AGTRAP	Q6RW13	Type-1 angiotensin II receptor-associated protein	1.30735	0.263149	-1.18
Q6UB35	MTHFD1L	MTHFD1L	Q6UB35	Monofunctional C1-tetrahydrofolate synthase, mitochondrial	0.207126	0.813558	0.209314
Q6UN15	FIP1L1	FIP1L1	Q6UN15	Pre-mRNA 3-end-processing factor FIP1	1.5612	0.22	1.9835
Q6UWE0	LRSAM1	LRSAM1	Q6UWE0	E3 ubiquitin-protein ligase LRSAM1	0.411418	0.621278	0.942841
Q6UXV4	APOOL	APOOL	Q6UXV4	MICOS complex subunit MIC27	1.31203	0.263169	2.31874
Q6VY07	PACS1	PACS1	Q6VY07	Phosphofurin acidic cluster sorting protein 1	0.155532	0.857921	0.186786
Q6WCQ1	MPRIP	MPRIP	Q6WCQ1	Myosin phosphatase Rho-interacting protein	0.248488	0.769842	0.679597
Q6XQN6	NAPRT	NAPRT	Q6XQN6	Nicotinate phosphoribosyltransferase	1.45496	0.243429	-1.49629
Q6XZF7	DNMBP	DNMBP	Q6XZF7	Dynamin-binding protein	0.0211432	0.97382	0.0458613
Q6Y288	B3GALTL	B3GALTL	Q6Y288	Beta-1,3-glucosyltransferase	1.13297	0.309735	1.38018
Q6Y7W6	GIGYF2	GIGYF2	Q6Y7W6	PERQ amino acid-rich with GYF domain-containing protein 2	0.877805	0.379696	1.95827
Q6YHK3	CD109	CD109	Q6YHK3	CD109 antigen	0.579927	0.517445	1.13768
Q6YHU6	THADA	THADA	Q6YHU6	Thyroid adenoma-associated protein	0.538465	0.537499	-0.390012
Q6YN16	HSDL2	HSDL2	Q6YN16	Hydroxysteroid dehydrogenase-like protein 2	0.838574	0.389062	0.501774
Q6YP21	CCBL2	CCBL2	Q6YP21	Kynurenine--oxoglutarate transaminase 3	0.440575	0.600398	0.9024
Q6ZMG9	CERS6	CERS6	Q6ZMG9	Ceramide synthase 6	0.115365	0.894672	-0.198026
Q6ZMI0	PPP1R21	PPP1R21	Q6ZMI0	Protein phosphatase 1 regulatory subunit 21	0.591632	0.509826	1.10964
Q6ZMZ3	SYNE3	SYNE3	Q6ZMZ3	Nesprin-3	0.216976	0.805567	0.340202
Q6ZRP7	QSOX2	QSOX2	Q6ZRP7	Sulfhydryl oxidase 2	0.720668	0.43645	1.50064
Q6ZS17	FAM65A	FAM65A	Q6ZS17	Protein FAM65A	0.367246	0.653433	-0.639455
Q6ZSR9	FLJ45252	FLJ45252	Q6ZSR9	Uncharacterized protein FLJ45252	0.328156	0.688236	-0.440458
Q6ZSZ5	ARHGEF18	ARHGEF18	Q6ZSZ5	Rho guanine nucleotide exchange factor 18	0.959007	0.361511	-1.09664
Q6ZVM7	TOM1L2	TOM1L2	Q6ZVM7	TOM1-like protein 2	0.286912	0.731324	0.637037
Q6ZXV5	TMTC3	TMTC3	Q6ZXV5	Transmembrane and TPR repeat-containing protein 3	0.341254	0.676707	0.729978
Q709C8	VPS13C	VPS13C	Q709C8	Vacuolar protein sorting-associated protein 13C	0.365739	0.653856	0.552928
Q70E73	RAPH1	RAPH1	Q70E73	Ras-associated and pleckstrin homology domains-containing protein 1	0.0774503	0.926166	-0.0533352
Q70UQ0	IKBIP	IKBIP	Q70UQ0	Inhibitor of nuclear factor kappa-B kinase-interacting protein	0.484296	0.56933	0.505856
Q71DI3	HIST2H3A	HIST2H3A	Q71DI3	Histone H3.2	1.8931	0.182545	-5.4968
Q71UM5	RPS27L	RPS27L	Q71UM5	40S ribosomal protein S27-like	1.0878	0.327401	2.17357
Q7KZ85	SUPT6H	SUPT6H	Q7KZ85	Transcription elongation factor SPT6	0.0986979	0.905083	0.208331
Q7KZF4	SND1	SND1	Q7KZF4	Staphylococcal nuclease domain-containing protein 1	0.583638	0.515385	-0.246665
Q7L014	DDX46	DDX46	Q7L014	Probable ATP-dependent RNA helicase DDX46	0.31211	0.702834	-0.50922
Q7L0Y3	TRMT10C	TRMT10C	Q7L0Y3	Mitochondrial ribonuclease P protein 1	0.0799441	0.923285	-0.0862223
Q7L1Q6	BZW1	BZW1	Q7L1Q6	Basic leucine zipper and W2 domain-containing protein 1	0.365725	0.65349	-0.472232
Q7L2E3	DHX30	DHX30	Q7L2E3	Putative ATP-dependent RNA helicase DHX30	1.1086	0.32	1.77189
Q7L2H7	EIF3M	EIF3M	Q7L2H7	Eukaryotic translation initiation factor 3 subunit M	0.942171	0.3662	-0.222857
Q7L311	ARMCX2	ARMCX2	Q7L311	Armadillo repeat-containing X-linked protein 2	0.367612	0.652715	0.535859
Q7L523	RRAGA	RRAGA;RRAGB	Q7L523;Q5VZM2	Ras-related GTP-binding protein A;Ras-related GTP-binding protein B	1.20563	0.28688	-1.62954
Q7L576	CYFIP1	CYFIP1	Q7L576	Cytoplasmic FMR1-interacting protein 1	0.200678	0.817798	-0.145486
Q7L5N1	COPS6	COPS6	Q7L5N1	COP9 signalosome complex subunit 6	0.298979	0.718292	0.234929
Q7L775	EPM2AIP1	EPM2AIP1	Q7L775	EPM2A-interacting protein 1	0.137167	0.873668	0.244554
Q7L7V1	DHX32	DHX32	Q7L7V1	Putative pre-mRNA-splicing factor ATP-dependent RNA helicase DHX32	0.213195	0.809487	-0.248489
Q7Z2H8	SLC36A1	SLC36A1	Q7Z2H8	Proton-coupled amino acid transporter 1	1.8041	0.187354	1.6722
Q7Z2W4	ZC3HAV1	ZC3HAV1	Q7Z2W4	Zinc finger CCCH-type antiviral protein 1	0.167333	0.846727	0.213964
Q7Z2W9	MRPL21	MRPL21	Q7Z2W9	39S ribosomal protein L21, mitochondrial	0.368613	0.652387	0.510025
Q7Z2Z2	EFTUD1	EFTUD1	Q7Z2Z2	Elongation factor Tu GTP-binding domain-containing protein 1	1.50209	0.236436	0.59182
Q7Z3B4	NUP54	NUP54	Q7Z3B4	Nucleoporin p54	0.0292874	0.968898	-0.0376856
Q7Z3D6	C14orf159	C14orf159	Q7Z3D6	UPF0317 protein C14orf159, mitochondrial	2.20353	0.170101	1.02174
Q7Z3J2	C16orf62	C16orf62	Q7Z3J2	UPF0505 protein C16orf62	0.667714	0.464878	-0.922687
Q7Z3T8	ZFYVE16	ZFYVE16	Q7Z3T8	Zinc finger FYVE domain-containing protein 16	2.02288	0.166935	2.05631
Q7Z3U7	MON2	MON2	Q7Z3U7	Protein MON2 homolog	0.358075	0.660611	0.878367
Q7Z406	MYH14	MYH14	Q7Z406	Myosin-14	0.0994535	0.904915	0.314615
Q7Z434	MAVS	MAVS	Q7Z434	Mitochondrial antiviral-signaling protein	0.64699	0.477364	-1.59029
Q7Z460	CLASP1	CLASP1	Q7Z460	CLIP-associating protein 1	0.832074	0.392169	1.16546
Q7Z478	DHX29	DHX29	Q7Z478	ATP-dependent RNA helicase DHX29	0.732602	0.433234	0.622042
Q7Z4G4	TRMT11	TRMT11	Q7Z4G4	tRNA (guanine(10)-N2)-methyltransferase homolog	0.723091	0.436343	1.07222
Q7Z4H8	KDELC2	KDELC2	Q7Z4H8	KDEL motif-containing protein 2	0.201194	0.818007	0.586514
Q7Z4W1	DCXR	DCXR	Q7Z4W1	L-xylulose reductase	0.727625	0.435897	-1.06952
Q7Z5R6	APBB1IP	APBB1IP	Q7Z5R6	Amyloid beta A4 precursor protein-binding family B member 1-interacting protein	0.0988185	0.905046	0.196305
Q7Z6Z7	HUWE1	HUWE1	Q7Z6Z7	E3 ubiquitin-protein ligase HUWE1	0.510569	0.556124	0.22193
Q7Z739	YTHDF3	YTHDF3;YTHDF1	Q7Z739;Q9BYJ9	YTH domain-containing family protein 3;YTH domain-containing family protein 1	0.317786	0.698587	-0.573538
Q7Z7A4	PXK	PXK	Q7Z7A4	PX domain-containing protein kinase-like protein	0.15139	0.857947	0.325342
Q7Z7H5	TMED4	TMED4	Q7Z7H5	Transmembrane emp24 domain-containing protein 4	0.616964	0.496632	1.13011
Q7Z7M9	GALNT5	GALNT5	Q7Z7M9	Polypeptide N-acetylgalactosaminyltransferase 5	0.248654	0.770002	-0.718139
Q86TI0	TBC1D1	TBC1D1	Q86TI0	TBC1 domain family member 1	0.00250536	0.997683	0.0033861
Q86TI2	DPP9	DPP9	Q86TI2	Dipeptidyl peptidase 9	0.492081	0.568251	-0.64254
Q86TU7	SETD3	SETD3	Q86TU7	Histone-lysine N-methyltransferase setd3	1.22359	0.279487	1.42735
Q86U38	NOP9	NOP9	Q86U38	Nucleolar protein 9	0.22839	0.790257	-0.593104
Q86U42	PABPN1	PABPN1	Q86U42	Polyadenylate-binding protein 2	1.11552	0.317463	-1.23847
Q86UE4	MTDH	MTDH	Q86UE4	Protein LYRIC	1.58673	0.220558	-0.888631
Q86UP2	KTN1	KTN1	Q86UP2	Kinectin	2.10633	0.178052	0.577029
Q86UT6	NLRX1	NLRX1	Q86UT6	NLR family member X1	0.465368	0.582119	0.741815
Q86UU1	PHLDB1	PHLDB1	Q86UU1	Pleckstrin homology-like domain family B member 1	2.28326	0.159289	2.59905
Q86V81	ALYREF	ALYREF	Q86V81	THO complex subunit 4	1.29173	0.266064	-2.8334
Q86VP6	CAND1	CAND1	Q86VP6;O75155	Cullin-associated NEDD8-dissociated protein 1	0.0312648	0.966544	0.0194238
Q86VR2	FAM134C	FAM134C	Q86VR2	Protein FAM134C	0.985146	0.357004	1.10005
Q86VS8	HOOK3	HOOK3	Q86VS8	Protein Hook homolog 3	0.432754	0.604987	0.946932
Q86W92	PPFIBP1	PPFIBP1	Q86W92;Q8ND30	Liprin-beta-1	1.66669	0.204467	1.23476
Q86WA8	LONP2	LONP2	Q86WA8	Lon protease homolog 2, peroxisomal	0.351365	0.670838	0.711311
Q86X55	CARM1	CARM1	Q86X55	Histone-arginine methyltransferase CARM1	0.870669	0.381705	0.48419
Q86X76	NIT1	NIT1	Q86X76	Nitrilase homolog 1	1.10841	0.319431	-0.705253
Q86X83	COMMD2	COMMD2	Q86X83	COMM domain-containing protein 2	0.851873	0.388838	-1.88347
Q86XA9	HEATR5A	HEATR5A	Q86XA9	HEAT repeat-containing protein 5A	0.159683	0.853182	-0.40976
Q86XP3	DDX42	DDX42	Q86XP3	ATP-dependent RNA helicase DDX42	1.33108	0.262514	0.777162
Q86Y07	VRK2	VRK2	Q86Y07	Serine/threonine-protein kinase VRK2	0.925383	0.371984	0.953197
Q86Y56	DNAAF5	DNAAF5	Q86Y56	Dynein assembly factor 5, axonemal	0.743654	0.431229	0.600597
Q86Y82	STX12	STX12	Q86Y82	Syntaxin-12	0.541642	0.537952	1.2491
Q8IUD2	ERC1	ERC1	Q8IUD2;O15083	ELKS/Rab6-interacting/CAST family member 1	0.947294	0.361464	1.07508
Q8IUI8	CRLF3	CRLF3	Q8IUI8	Cytokine receptor-like factor 3	0.388773	0.634337	1.22402
Q8IUR7	ARMC8	ARMC8	Q8IUR7	Armadillo repeat-containing protein 8	1.32517	0.264227	-1.22174
Q8IV08	PLD3	PLD3	Q8IV08	Phospholipase D3	0.29816	0.719456	0.906002
Q8IV20	LACC1	LACC1	Q8IV20	Laccase domain-containing protein 1	0.406746	0.624069	0.498207
Q8IVD9	NUDCD3	NUDCD3	Q8IVD9	NudC domain-containing protein 3	0.619315	0.496491	-1.04122
Q8IVF7	FMNL3	FMNL3	Q8IVF7	Formin-like protein 3	0.129231	0.879543	0.357179
Q8IVG5	SAMD9L	SAMD9L	Q8IVG5	Sterile alpha motif domain-containing protein 9-like	0.618622	0.496725	0.878842
Q8IVH4	MMAA	MMAA	Q8IVH4	Methylmalonic aciduria type A protein, mitochondrial	0.468908	0.580253	1.32033
Q8IVL6	LEPREL2	LEPREL2	Q8IVL6	Prolyl 3-hydroxylase 3	0.953212	0.362	1.71236
Q8IW45	CARKD	CARKD	Q8IW45	ATP-dependent (S)-NAD(P)H-hydrate dehydratase	1.3972	0.256346	1.47597
Q8IWA0	WDR75	WDR75	Q8IWA0	WD repeat-containing protein 75	1.45538	0.244171	1.39473
Q8IWA4	MFN1	MFN1	Q8IWA4	Mitofusin-1	0.300842	0.717646	-0.300769
Q8IWA5	SLC44A2	SLC44A2	Q8IWA5	Choline transporter-like protein 2	0.869091	0.382338	-0.472951
Q8IWB1	ITPRIP	ITPRIP	Q8IWB1;REV__Q96B96	Inositol 1,4,5-trisphosphate receptor-interacting protein	0.239963	0.776823	0.206731
Q8IWB7	WDFY1	WDFY1	Q8IWB7	WD repeat and FYVE domain-containing protein 1	0.654474	0.471348	-0.765223
Q8IWE2	FAM114A1	FAM114A1	Q8IWE2	Protein NOXP20	0.0370427	0.962485	0.0199986
Q8IWT6	LRRC8A	LRRC8A	Q8IWT6	Volume-regulated anion channel subunit LRRC8A	0.34875	0.672899	0.58988
Q8IWV7	UBR1	UBR1	Q8IWV7	E3 ubiquitin-protein ligase UBR1	1.20755	0.285951	2.86916
Q8IWV8	UBR2	UBR2	Q8IWV8	E3 ubiquitin-protein ligase UBR2	1.94839	0.178213	2.19963
Q8IX12	CCAR1	CCAR1	Q8IX12	Cell division cycle and apoptosis regulator protein 1	0.138068	0.872316	0.349842
Q8IXB1	DNAJC10	DNAJC10	Q8IXB1	DnaJ homolog subfamily C member 10	0.208603	0.811771	0.528341
Q8IXI1	RHOT2	RHOT2	Q8IXI1	Mitochondrial Rho GTPase 2	0.718361	0.437139	1.05228
Q8IXI2	RHOT1	RHOT1	Q8IXI2	Mitochondrial Rho GTPase 1	0.799553	0.410011	0.886907
Q8IXJ6	SIRT2	SIRT2	Q8IXJ6	NAD-dependent protein deacetylase sirtuin-2	0.138504	0.872446	-0.317275
Q8IXT5	RBM12B	RBM12B	Q8IXT5	RNA-binding protein 12B	0.755506	0.428973	-0.839007
Q8IY17	PNPLA6	PNPLA6	Q8IY17	Neuropathy target esterase	0.0233466	0.96993	0.00618426
Q8IY81	FTSJ3	FTSJ3	Q8IY81	pre-rRNA processing protein FTSJ3	0.517409	0.550912	0.53554
Q8IYB3	SRRM1	SRRM1	Q8IYB3	Serine/arginine repetitive matrix protein 1	0.945513	0.36267	-0.853311
Q8IYB8	SUPV3L1	SUPV3L1	Q8IYB8	ATP-dependent RNA helicase SUPV3L1, mitochondrial	0.1848	0.833281	-0.172767
Q8IYD1	GSPT2	GSPT2	Q8IYD1	Eukaryotic peptide chain release factor GTP-binding subunit ERF3B	0.113055	0.895379	-0.192226
Q8IYI6	EXOC8	EXOC8	Q8IYI6	Exocyst complex component 8	0.0977959	0.905929	0.265085
Q8IYM9	TRIM22	TRIM22	Q8IYM9	E3 ubiquitin-protein ligase TRIM22	0.684065	0.456637	-1.60648
Q8IYS2	KIAA2013	KIAA2013	Q8IYS2	Uncharacterized protein KIAA2013	0.185379	0.83406	-0.538379
Q8IYU8	MICU2	MICU2	Q8IYU8	Calcium uptake protein 2, mitochondrial	0.588607	0.51283	0.446985
Q8IZ83	ALDH16A1	ALDH16A1	Q8IZ83	Aldehyde dehydrogenase family 16 member A1	0.605306	0.503438	-0.27693
Q8IZH2	XRN1	XRN1	Q8IZH2	5-3 exoribonuclease 1	0.106728	0.898578	0.137569
Q8IZL8	PELP1	PELP1	Q8IZL8	Proline-, glutamic acid- and leucine-rich protein 1	0.190383	0.829753	-0.181557
Q8IZP0	ABI1	ABI1	Q8IZP0	Abl interactor 1	0.284298	0.732509	-0.580819
Q8N0U8	VKORC1L1	VKORC1L1	Q8N0U8	Vitamin K epoxide reductase complex subunit 1-like protein 1	0.458037	0.587142	-0.461292
Q8N0X7	SPG20	SPG20	Q8N0X7	Spartin	1.04635	0.337644	0.720984
Q8N163	CCAR2	CCAR2	Q8N163	Cell cycle and apoptosis regulator protein 2	0.553371	0.528737	0.205722
Q8N1B4	VPS52	VPS52	Q8N1B4	Vacuolar protein sorting-associated protein 52 homolog	0.599286	0.505272	0.44232
Q8N1F7	NUP93	NUP93	Q8N1F7	Nuclear pore complex protein Nup93	0.739717	0.432479	-0.482592
Q8N1F8	STK11IP	STK11IP	Q8N1F8	Serine/threonine-protein kinase 11-interacting protein	0.0348425	0.964265	-0.0883047
Q8N1G4	LRRC47	LRRC47	Q8N1G4	Leucine-rich repeat-containing protein 47	0.511824	0.555783	0.271856
Q8N201	INTS1	INTS1	Q8N201	Integrator complex subunit 1	0.244573	0.774459	-0.277277
Q8N2G8	GHDC	GHDC	Q8N2G8	GH3 domain-containing protein	0.0518397	0.949979	0.0641987
Q8N2K0	ABHD12	ABHD12	Q8N2K0	Monoacylglycerol lipase ABHD12	0.306843	0.707874	-0.47747
Q8N392	ARHGAP18	ARHGAP18	Q8N392	Rho GTPase-activating protein 18	1.49562	0.236925	0.779404
Q8N3C0	ASCC3	ASCC3	Q8N3C0	Activating signal cointegrator 1 complex subunit 3	0.307283	0.708159	-0.638225
Q8N3U4	STAG2	STAG2	Q8N3U4	Cohesin subunit SA-2	0.128076	0.880396	0.0959493
Q8N3V7	SYNPO	SYNPO	Q8N3V7	Synaptopodin	0.715175	0.438165	1.33771
Q8N4L2	TMEM55A	TMEM55A	Q8N4L2	Type 2 phosphatidylinositol 4,5-bisphosphate 4-phosphatase	0.979241	0.357576	1.40321
Q8N573	OXR1	OXR1	Q8N573	Oxidation resistance protein 1	1.42261	0.250262	1.80916
Q8N5C1	FAM26E	FAM26E	Q8N5C1	Protein FAM26E	0.720956	0.436398	-1.09667
Q8N612	FAM160A2	FAM160A2	Q8N612	FTS and Hook-interacting protein	0.663753	0.467478	-0.839529
Q8N684	CPSF7	CPSF7	Q8N684	Cleavage and polyadenylation specificity factor subunit 7	0.699577	0.447618	0.243678
Q8N6T3	ARFGAP1	ARFGAP1	Q8N6T3	ADP-ribosylation factor GTPase-activating protein 1	0.0867123	0.919382	0.224696
Q8N766	EMC1	EMC1	Q8N766	ER membrane protein complex subunit 1	1.17151	0.302994	0.367139
Q8N7H5	PAF1	PAF1	Q8N7H5	RNA polymerase II-associated factor 1 homolog	0.962822	0.36209	1.39473
Q8N8S7	ENAH	ENAH	Q8N8S7;Q9UI08	Protein enabled homolog	0.0322474	0.965256	-0.137335
Q8N9N7	LRRC57	LRRC57	Q8N9N7	Leucine-rich repeat-containing protein 57	0.160526	0.852874	0.351178
Q8N9T8	KRI1	KRI1	Q8N9T8	Protein KRI1 homolog	0.914517	0.374323	1.56643
Q8NB37	PDDC1	PDDC1	Q8NB37	Parkinson disease 7 domain-containing protein 1	0.276664	0.739209	1.0997
Q8NB49	ATP11C	ATP11C	Q8NB49	Phospholipid-transporting ATPase IG	0.0395643	0.960279	-0.0638246
Q8NB90	SPATA5	SPATA5	Q8NB90	Spermatogenesis-associated protein 5	0.0742512	0.930207	0.110437
Q8NBF2	NHLRC2	NHLRC2	Q8NBF2	NHL repeat-containing protein 2	1.68742	0.196991	0.717067
Q8NBJ5	COLGALT1	COLGALT1	Q8NBJ5	Procollagen galactosyltransferase 1	0.067379	0.936299	0.264634
Q8NBJ7	SUMF2	SUMF2	Q8NBJ7	Sulfatase-modifying factor 2	0.162106	0.850423	0.416357
Q8NBM8	PCYOX1L	PCYOX1L	Q8NBM8	Prenylcysteine oxidase-like	0.0691308	0.934643	-0.188075
Q8NBQ5	HSD17B11	HSD17B11	Q8NBQ5	Estradiol 17-beta-dehydrogenase 11	0.130849	0.878237	0.206015
Q8NBS9	TXNDC5	TXNDC5	Q8NBS9	Thioredoxin domain-containing protein 5	0.320938	0.695442	0.351225
Q8NBU5	ATAD1	ATAD1	Q8NBU5	ATPase family AAA domain-containing protein 1	0.935839	0.369799	-2.5475
Q8NBX0	SCCPDH	SCCPDH	Q8NBX0	Saccharopine dehydrogenase-like oxidoreductase	1.14788	0.304472	-1.02198
Q8NC51	SERBP1	SERBP1	Q8NC51	Plasminogen activator inhibitor 1 RNA-binding protein	0.819274	0.3993	0.37834
Q8NC56	LEMD2	LEMD2	Q8NC56	LEM domain-containing protein 2	0.384866	0.636745	-0.445989
Q8NCA5	FAM98A	FAM98A	Q8NCA5	Protein FAM98A	0.291393	0.726201	1.00624
Q8NCE2	MTMR14	MTMR14	Q8NCE2	Myotubularin-related protein 14	1.76639	0.188734	1.57442
Q8NCN5	PDPR	PDPR	Q8NCN5	Pyruvate dehydrogenase phosphatase regulatory subunit, mitochondrial	0.0340665	0.964521	0.0324809
Q8NCW5	APOA1BP	APOA1BP	Q8NCW5	NAD(P)H-hydrate epimerase	0.0238962	0.969897	-0.0272706
Q8ND56	LSM14A	LSM14A	Q8ND56	Protein LSM14 homolog A	0.00505141	0.994059	-0.0157107
Q8ND76	CCNY	CCNY	Q8ND76	Cyclin-Y	0.855919	0.387986	0.901506
Q8NDH2	CCDC168	CCDC168	Q8NDH2	Coiled-coil domain-containing protein 168	0.633029	0.488027	0.754018
Q8NDH3	NPEPL1	NPEPL1	Q8NDH3	Probable aminopeptidase NPEPL1	0.605673	0.504236	-0.464808
Q8NDT2	RBM15B	RBM15B	Q8NDT2	Putative RNA-binding protein 15B	0.329212	0.68895	0.65327
Q8NE71	ABCF1	ABCF1	Q8NE71	ATP-binding cassette sub-family F member 1	0.614735	0.49769	-0.584446
Q8NE86	MCU	MCU	Q8NE86	Calcium uniporter protein, mitochondrial	0.0822433	0.922023	-0.194351
Q8NEB9	PIK3C3	PIK3C3	Q8NEB9	Phosphatidylinositol 3-kinase catalytic subunit type 3	0.932433	0.372256	-0.812641
Q8NEU8	APPL2	APPL2	Q8NEU8	DCC-interacting protein 13-beta	0.0237689	0.969746	0.0695807
Q8NEZ5	FBXO22	FBXO22	Q8NEZ5	F-box only protein 22	0.327943	0.688472	-0.424026
Q8NF37	LPCAT1	LPCAT1	Q8NF37	Lysophosphatidylcholine acyltransferase 1	0.52534	0.548237	0.948532
Q8NF91	SYNE1	SYNE1	Q8NF91	Nesprin-1	1.38328	0.255783	1.81653
Q8NFF5	FLAD1	FLAD1	Q8NFF5	FAD synthase;Molybdenum cofactor biosynthesis protein-like region;FAD synthase region	0.0269698	0.970041	0.0585365
Q8NFH3	NUP43	NUP43	Q8NFH3	Nucleoporin Nup43	0.24144	0.775421	-0.598728
Q8NFH4	NUP37	NUP37	Q8NFH4	Nucleoporin Nup37	0.601241	0.50477	-0.712254
Q8NFQ8	TOR1AIP2	TOR1AIP2	Q8NFQ8	Torsin-1A-interacting protein 2	1.20119	0.289543	1.35134
Q8NFW8	CMAS	CMAS	Q8NFW8	N-acylneuraminate cytidylyltransferase	0.478447	0.574742	-1.17683
Q8NHH9	ATL2	ATL2	Q8NHH9	Atlastin-2	0.382252	0.639249	0.841696
Q8NHP8	PLBD2	PLBD2	Q8NHP8	Putative phospholipase B-like 2;Putative phospholipase B-like 2 32 kDa form;Putative phospholipase B-like 2 45 kDa form	0.387969	0.634465	-0.317581
Q8NI27	THOC2	THOC2	Q8NI27	THO complex subunit 2	0.675485	0.462843	0.498859
Q8NI36	WDR36	WDR36	Q8NI36	WD repeat-containing protein 36	0.761736	0.425237	1.73927
Q8TAQ2	SMARCC2	SMARCC2	Q8TAQ2	SWI/SNF complex subunit SMARCC2	0.884234	0.379868	0.42894
Q8TAT6	NPLOC4	NPLOC4	Q8TAT6	Nuclear protein localization protein 4 homolog	0.717802	0.437022	0.572122
Q8TB40	ABHD4	ABHD4	Q8TB40	Abhydrolase domain-containing protein 4	0.0256982	0.9687	0.04389
Q8TB52	FBXO30	FBXO30	Q8TB52	F-box only protein 30	0.71675	0.437669	1.47198
Q8TB61	SLC35B2	SLC35B2	Q8TB61	Adenosine 3-phospho 5-phosphosulfate transporter 1	0.606068	0.50422	-0.81123
Q8TB72	PUM2	PUM2	Q8TB72	Pumilio homolog 2	0.0372942	0.962444	0.0556725
Q8TBC4	UBA3	UBA3	Q8TBC4	NEDD8-activating enzyme E1 catalytic subunit	0.607654	0.502452	0.363036
Q8TBX8	PIP4K2C	PIP4K2C	Q8TBX8	Phosphatidylinositol 5-phosphate 4-kinase type-2 gamma	1.83527	0.185516	-1.70978
Q8TC07	TBC1D15	TBC1D15	Q8TC07	TBC1 domain family member 15	0.0493743	0.95246	-0.0860962
Q8TC12	RDH11	RDH11	Q8TC12	Retinol dehydrogenase 11	0.164917	0.849957	-0.154468
Q8TCJ2	STT3B	STT3B	Q8TCJ2	Dolichyl-diphosphooligosaccharide--protein glycosyltransferase subunit STT3B	0.97719	0.358398	-2.14264
Q8TCS8	PNPT1	PNPT1	Q8TCS8	Polyribonucleotide nucleotidyltransferase 1, mitochondrial	0.0432178	0.956427	-0.055404
Q8TCT9	HM13	HM13	Q8TCT9	Minor histocompatibility antigen H13	0.89357	0.378017	0.785325
Q8TD19	NEK9	NEK9	Q8TD19	Serine/threonine-protein kinase Nek9	1.15138	0.304558	0.593046
Q8TD55	PLEKHO2	PLEKHO2	Q8TD55	Pleckstrin homology domain-containing family O member 2	0.458916	0.587368	0.545475
Q8TDN6	BRIX1	BRIX1	Q8TDN6	Ribosome biogenesis protein BRX1 homolog	1.82602	0.183849	1.46122
Q8TDQ7	GNPDA2	GNPDA2	Q8TDQ7	Glucosamine-6-phosphate isomerase 2	1.01191	0.3469	-1.63552
Q8TDX7	NEK7	NEK7;NEK6	Q8TDX7;Q9HC98	Serine/threonine-protein kinase Nek7;Serine/threonine-protein kinase Nek6	0.256515	0.761119	0.605027
[truncated: 835 more rows]
